# Supplementary material
Source: publisher figshare collection journal article supplement (https://frontiersin.figshare.com/ndownloader/files/28174452)
Supplement: Supplementary file 1 [file 28174452]

## Sheet: TableS1
Table S1: Number of sediment samples for which the two PCR repliates were successfully sequenced
area	molecule	37F	V1V2	37F (%)	V1V2 (%)
CCFZ	DNA	160	125	89.3855	69.8324
	RNA	141	43	78.7709	24.0223
Mid_Atlantic	DNA	23	22	85.1852	81.4815
	RNA	22	0	81.4815	0
North_Atlantic	DNA	14	0	77.7778	0
	RNA	6	0	33.3333	0
North_Pacific	DNA	31	33	93.9394	100
	RNA	33	0	100	0
South_Atlantic	DNA	5	0	62.5	0
	RNA	5	0	62.5	0
Southern_Ocean	DNA	41	23	89.1304	50
	RNA	35	0	76.087	0

## Sheet: TableS2
Table S2: Sample metadata, including reads and features counts after each filtering step
sample_name	BarcodeSequence	LinkerPrimerSequence	target_gene	marker	target_subfragment	molecule	sediment_sample	pcr_replicate	submitted_to_insdc	investigation_type	project_name	experimental_factor	alt_elev	env_biome	env_feature	env_material	env_package	rel_to_oxygen	nucl_acid_ext	nucl_acid_amp	lib_const_meth	chimera_check	dna_extracted	extract_concentration	forward_primer	reverse_primer	forward_primer_seq	reverse_primer_seq	pcr_primers	tagged_primers_combi	tagged_primers_combi_seq	library	lib_reads_seqd	lib_vector	lib_screen	sequencing_date	library_index	seq_meth	instrument	seq_quality_check	lane	ng_per_pooled_samp	lib_conc_init	lib_conc_final	lib_size	pcr_cond	pcr_conc_init	pcr_pooled_vol	pcr_pooled_ng
37F.DNA.1.A	CCCCCCCG	CCCCCCCG	18S_rRNA	37F	37F	DNA	1	A	No	MIMARKS-survey	DSMP	gene|marine_metagenome|uncultured_microorganism|uncultured_organism|ecotype|biological_replicate|technical_replicate|interspecies_interaction_between_organisms	0	marine_abyssal_zone_biome	marine_oligotrophic_desert	mud	sediment	aerobe	https://www.qiagen.com/us/cmp/ecom/powersoilkits?COECM_MOBIO_Branded_1707_SEA_PowerSoil__&kwid=%2Bpower%20%2Bsoil%20%2Brna	https://github.com/FranckLejzerowicz/protocols	TruSeq_Nano_PCR_free_Library_Preparation_Kit_single-end	uchime_4.2	TRUE	13.4	F1-A	15-D	CACACACAAAGGGCACCACAAGAACGC	AGTGCTGCCCACCTATCACACAATCATG	FWD:_{AAGGGCACCACAAGAACGC}_REV:_{CCACCTATCACACAATCATG}	F1-A_15-D	CACACACAAAGGGCACCACAAGAACGC_AGTGCTGCCCACCTATCACACAATCATG	AB02_37F_DNA_A_1_1	2007312	TruSeq	normalized	2016-05-20		Illumina	MiSeq	none	Lane_MiSeq_37F	40	115.46	4	47	initial_denaturation:95_5;_denaturation:_94_0.5;_annealing:52_0.2;_elongation:_72_1;_40_cycles;_final_elongation:72_2	10.7	3.74	40.02
37F.DNA.1.B	CCCCCCCT	CCCCCCCT	18S_rRNA	37F	37F	DNA	1	B	No	MIMARKS-survey	DSMP	gene|marine_metagenome|uncultured_microorganism|uncultured_organism|ecotype|biological_replicate|technical_replicate|interspecies_interaction_between_organisms	0	marine_abyssal_zone_biome	marine_oligotrophic_desert	mud	sediment	aerobe	https://www.qiagen.com/us/cmp/ecom/powersoilkits?COECM_MOBIO_Branded_1707_SEA_PowerSoil__&kwid=%2Bpower%20%2Bsoil%20%2Brna	https://github.com/FranckLejzerowicz/protocols	TruSeq_Nano_PCR_free_Library_Preparation_Kit_single-end	uchime_4.2	TRUE	13.4	F1-A	15-D	CACACACAAAGGGCACCACAAGAACGC	AGTGCTGCCCACCTATCACACAATCATG	FWD:_{AAGGGCACCACAAGAACGC}_REV:_{CCACCTATCACACAATCATG}	F1-A_15-D	CACACACAAAGGGCACCACAAGAACGC_AGTGCTGCCCACCTATCACACAATCATG	AB02_37F_DNA_B_1_1	1757175	TruSeq	normalized	2016-05-20		Illumina	MiSeq	none	Lane_MiSeq_37F	40	88.73	4	47	initial_denaturation:95_5;_denaturation:_94_0.5;_annealing:52_0.2;_elongation:_72_1;_40_cycles;_final_elongation:72_2	11.3	3.54	40
37F.DNA.2.A	CCCCCCGC	CCCCCCGC	18S_rRNA	37F	37F	DNA	2	A	No	MIMARKS-survey	DSMP	gene|marine_metagenome|uncultured_microorganism|uncultured_organism|ecotype|biological_replicate|technical_replicate|interspecies_interaction_between_organisms	0	marine_abyssal_zone_biome	marine_oligotrophic_desert	mud	sediment	aerobe	https://www.qiagen.com/us/cmp/ecom/powersoilkits?COECM_MOBIO_Branded_1707_SEA_PowerSoil__&kwid=%2Bpower%20%2Bsoil%20%2Brna	https://github.com/FranckLejzerowicz/protocols	TruSeq_Nano_PCR_free_Library_Preparation_Kit_single-end	uchime_4.2	TRUE	15.5	F1-A	15-H	CACACACAAAGGGCACCACAAGAACGC	ATGTCAGTCCACCTATCACACAATCATG	FWD:_{AAGGGCACCACAAGAACGC}_REV:_{CCACCTATCACACAATCATG}	F1-A_15-H	CACACACAAAGGGCACCACAAGAACGC_ATGTCAGTCCACCTATCACACAATCATG	AB02_37F_DNA_A_1_1	2007312	TruSeq	normalized	2016-05-20		Illumina	MiSeq	none	Lane_MiSeq_37F	40	115.46	4	47	initial_denaturation:95_5;_denaturation:_94_0.5;_annealing:52_0.2;_elongation:_72_1;_40_cycles;_final_elongation:72_2	14.9	2.68	39.93
37F.DNA.2.B	CCCCCCGG	CCCCCCGG	18S_rRNA	37F	37F	DNA	2	B	No	MIMARKS-survey	DSMP	gene|marine_metagenome|uncultured_microorganism|uncultured_organism|ecotype|biological_replicate|technical_replicate|interspecies_interaction_between_organisms	0	marine_abyssal_zone_biome	marine_oligotrophic_desert	mud	sediment	aerobe	https://www.qiagen.com/us/cmp/ecom/powersoilkits?COECM_MOBIO_Branded_1707_SEA_PowerSoil__&kwid=%2Bpower%20%2Bsoil%20%2Brna	https://github.com/FranckLejzerowicz/protocols	TruSeq_Nano_PCR_free_Library_Preparation_Kit_single-end	uchime_4.2	TRUE	15.5	F1-A	15-H	CACACACAAAGGGCACCACAAGAACGC	ATGTCAGTCCACCTATCACACAATCATG	FWD:_{AAGGGCACCACAAGAACGC}_REV:_{CCACCTATCACACAATCATG}	F1-A_15-H	CACACACAAAGGGCACCACAAGAACGC_ATGTCAGTCCACCTATCACACAATCATG	AB02_37F_DNA_B_1_1	1757175	TruSeq	normalized	2016-05-20		Illumina	MiSeq	none	Lane_MiSeq_37F	40	88.73	4	47	initial_denaturation:95_5;_denaturation:_94_0.5;_annealing:52_0.2;_elongation:_72_1;_40_cycles;_final_elongation:72_2	15.1	2.65	40.02
37F.DNA.3.A	CCCCCCGT	CCCCCCGT	18S_rRNA	37F	37F	DNA	3	A	No	MIMARKS-survey	DSMP	gene|marine_metagenome|uncultured_microorganism|uncultured_organism|ecotype|biological_replicate|technical_replicate|interspecies_interaction_between_organisms	0	marine_abyssal_zone_biome	marine_oligotrophic_desert	mud	sediment	aerobe	https://www.qiagen.com/us/cmp/ecom/powersoilkits?COECM_MOBIO_Branded_1707_SEA_PowerSoil__&kwid=%2Bpower%20%2Bsoil%20%2Brna	https://github.com/FranckLejzerowicz/protocols	TruSeq_Nano_PCR_free_Library_Preparation_Kit_single-end	uchime_4.2	TRUE	16.3	F1-A	15-M	CACACACAAAGGGCACCACAAGAACGC	CGACGAGCCCACCTATCACACAATCATG	FWD:_{AAGGGCACCACAAGAACGC}_REV:_{CCACCTATCACACAATCATG}	F1-A_15-M	CACACACAAAGGGCACCACAAGAACGC_CGACGAGCCCACCTATCACACAATCATG	AB02_37F_DNA_A_1_1	2007312	TruSeq	normalized	2016-05-20		Illumina	MiSeq	none	Lane_MiSeq_37F	40	115.46	4	47	initial_denaturation:95_5;_denaturation:_94_0.5;_annealing:52_0.2;_elongation:_72_1;_40_cycles;_final_elongation:72_2	14.6	2.74	40
37F.DNA.3.B	CCCCCCTC	CCCCCCTC	18S_rRNA	37F	37F	DNA	3	B	No	MIMARKS-survey	DSMP	gene|marine_metagenome|uncultured_microorganism|uncultured_organism|ecotype|biological_replicate|technical_replicate|interspecies_interaction_between_organisms	0	marine_abyssal_zone_biome	marine_oligotrophic_desert	mud	sediment	aerobe	https://www.qiagen.com/us/cmp/ecom/powersoilkits?COECM_MOBIO_Branded_1707_SEA_PowerSoil__&kwid=%2Bpower%20%2Bsoil%20%2Brna	https://github.com/FranckLejzerowicz/protocols	TruSeq_Nano_PCR_free_Library_Preparation_Kit_single-end	uchime_4.2	TRUE	16.3	F1-A	15-M	CACACACAAAGGGCACCACAAGAACGC	CGACGAGCCCACCTATCACACAATCATG	FWD:_{AAGGGCACCACAAGAACGC}_REV:_{CCACCTATCACACAATCATG}	F1-A_15-M	CACACACAAAGGGCACCACAAGAACGC_CGACGAGCCCACCTATCACACAATCATG	AB02_37F_DNA_B_1_1	1757175	TruSeq	normalized	2016-05-20		Illumina	MiSeq	none	Lane_MiSeq_37F	40	88.73	4	47	initial_denaturation:95_5;_denaturation:_94_0.5;_annealing:52_0.2;_elongation:_72_1;_40_cycles;_final_elongation:72_2	15.5	2.58	39.99
37F.DNA.4.A	CCCCCCTG	CCCCCCTG	18S_rRNA	37F	37F	DNA	4	A	No	MIMARKS-survey	DSMP	gene|marine_metagenome|uncultured_microorganism|uncultured_organism|ecotype|biological_replicate|technical_replicate|interspecies_interaction_between_organisms	0	marine_abyssal_zone_biome	marine_oligotrophic_desert	mud	sediment	aerobe	https://www.qiagen.com/us/cmp/ecom/powersoilkits?COECM_MOBIO_Branded_1707_SEA_PowerSoil__&kwid=%2Bpower%20%2Bsoil%20%2Brna	https://github.com/FranckLejzerowicz/protocols	TruSeq_Nano_PCR_free_Library_Preparation_Kit_single-end	uchime_4.2	TRUE	16.4	F1-A	15-P	CACACACAAAGGGCACCACAAGAACGC	CTAGCATCCCACCTATCACACAATCATG	FWD:_{AAGGGCACCACAAGAACGC}_REV:_{CCACCTATCACACAATCATG}	F1-A_15-P	CACACACAAAGGGCACCACAAGAACGC_CTAGCATCCCACCTATCACACAATCATG	AB02_37F_DNA_A_1_1	2007312	TruSeq	normalized	2016-05-20		Illumina	MiSeq	none	Lane_MiSeq_37F	40	115.46	4	47	initial_denaturation:95_5;_denaturation:_94_0.5;_annealing:52_0.2;_elongation:_72_1;_40_cycles;_final_elongation:72_2	11.6	3.45	40.02
37F.DNA.4.B	CCCCCCTT	CCCCCCTT	18S_rRNA	37F	37F	DNA	4	B	No	MIMARKS-survey	DSMP	gene|marine_metagenome|uncultured_microorganism|uncultured_organism|ecotype|biological_replicate|technical_replicate|interspecies_interaction_between_organisms	0	marine_abyssal_zone_biome	marine_oligotrophic_desert	mud	sediment	aerobe	https://www.qiagen.com/us/cmp/ecom/powersoilkits?COECM_MOBIO_Branded_1707_SEA_PowerSoil__&kwid=%2Bpower%20%2Bsoil%20%2Brna	https://github.com/FranckLejzerowicz/protocols	TruSeq_Nano_PCR_free_Library_Preparation_Kit_single-end	uchime_4.2	TRUE	16.4	F1-A	15-P	CACACACAAAGGGCACCACAAGAACGC	CTAGCATCCCACCTATCACACAATCATG	FWD:_{AAGGGCACCACAAGAACGC}_REV:_{CCACCTATCACACAATCATG}	F1-A_15-P	CACACACAAAGGGCACCACAAGAACGC_CTAGCATCCCACCTATCACACAATCATG	AB02_37F_DNA_B_1_1	1757175	TruSeq	normalized	2016-05-20		Illumina	MiSeq	none	Lane_MiSeq_37F	40	88.73	4	47	initial_denaturation:95_5;_denaturation:_94_0.5;_annealing:52_0.2;_elongation:_72_1;_40_cycles;_final_elongation:72_2	11.1	3.6	39.96
37F.DNA.5.A	CCCCCGCC	CCCCCGCC	18S_rRNA	37F	37F	DNA	5	A	No	MIMARKS-survey	DSMP	gene|marine_metagenome|uncultured_microorganism|uncultured_organism|ecotype|biological_replicate|technical_replicate|interspecies_interaction_between_organisms	0	marine_abyssal_zone_biome	marine_oligotrophic_desert	mud	sediment	aerobe	https://www.qiagen.com/us/cmp/ecom/powersoilkits?COECM_MOBIO_Branded_1707_SEA_PowerSoil__&kwid=%2Bpower%20%2Bsoil%20%2Brna	https://github.com/FranckLejzerowicz/protocols	TruSeq_Nano_PCR_free_Library_Preparation_Kit_single-end	uchime_4.2	TRUE	12.5	F1-B	15-F	CACATGATAAGGGCACCACAAGAACGC	ATATCTACCCACCTATCACACAATCATG	FWD:_{AAGGGCACCACAAGAACGC}_REV:_{CCACCTATCACACAATCATG}	F1-B_15-F	CACATGATAAGGGCACCACAAGAACGC_ATATCTACCCACCTATCACACAATCATG	AB02_37F_DNA_A_1_1	2007312	TruSeq	normalized	2016-05-20		Illumina	MiSeq	none	Lane_MiSeq_37F	40	115.46	4	47	initial_denaturation:95_5;_denaturation:_94_0.5;_annealing:52_0.2;_elongation:_72_1;_40_cycles;_final_elongation:72_2	9.36	4.27	39.97
37F.DNA.5.B	CCCCCGCG	CCCCCGCG	18S_rRNA	37F	37F	DNA	5	B	No	MIMARKS-survey	DSMP	gene|marine_metagenome|uncultured_microorganism|uncultured_organism|ecotype|biological_replicate|technical_replicate|interspecies_interaction_between_organisms	0	marine_abyssal_zone_biome	marine_oligotrophic_desert	mud	sediment	aerobe	https://www.qiagen.com/us/cmp/ecom/powersoilkits?COECM_MOBIO_Branded_1707_SEA_PowerSoil__&kwid=%2Bpower%20%2Bsoil%20%2Brna	https://github.com/FranckLejzerowicz/protocols	TruSeq_Nano_PCR_free_Library_Preparation_Kit_single-end	uchime_4.2	TRUE	12.5	F1-B	15-F	CACATGATAAGGGCACCACAAGAACGC	ATATCTACCCACCTATCACACAATCATG	FWD:_{AAGGGCACCACAAGAACGC}_REV:_{CCACCTATCACACAATCATG}	F1-B_15-F	CACATGATAAGGGCACCACAAGAACGC_ATATCTACCCACCTATCACACAATCATG	AB02_37F_DNA_B_1_1	1757175	TruSeq	normalized	2016-05-20		Illumina	MiSeq	none	Lane_MiSeq_37F	40	88.73	4	47	initial_denaturation:95_5;_denaturation:_94_0.5;_annealing:52_0.2;_elongation:_72_1;_40_cycles;_final_elongation:72_2	9.79	4.09	40.04
37F.DNA.6.A	CCCCCGCT	CCCCCGCT	18S_rRNA	37F	37F	DNA	6	A	No	MIMARKS-survey	DSMP	gene|marine_metagenome|uncultured_microorganism|uncultured_organism|ecotype|biological_replicate|technical_replicate|interspecies_interaction_between_organisms	0	marine_abyssal_zone_biome	marine_oligotrophic_desert	mud	sediment	aerobe	https://www.qiagen.com/us/cmp/ecom/powersoilkits?COECM_MOBIO_Branded_1707_SEA_PowerSoil__&kwid=%2Bpower%20%2Bsoil%20%2Brna	https://github.com/FranckLejzerowicz/protocols	TruSeq_Nano_PCR_free_Library_Preparation_Kit_single-end	uchime_4.2	TRUE	15.8	F1-B	15-I	CACATGATAAGGGCACCACAAGAACGC	ATGTGCTCCCACCTATCACACAATCATG	FWD:_{AAGGGCACCACAAGAACGC}_REV:_{CCACCTATCACACAATCATG}	F1-B_15-I	CACATGATAAGGGCACCACAAGAACGC_ATGTGCTCCCACCTATCACACAATCATG	AB02_37F_DNA_A_1_1	2007312	TruSeq	normalized	2016-05-20		Illumina	MiSeq	none	Lane_MiSeq_37F	40	115.46	4	47	initial_denaturation:95_5;_denaturation:_94_0.5;_annealing:52_0.2;_elongation:_72_1;_40_cycles;_final_elongation:72_2	10.3	3.88	39.96
37F.DNA.6.B	CCCCCGGC	CCCCCGGC	18S_rRNA	37F	37F	DNA	6	B	No	MIMARKS-survey	DSMP	gene|marine_metagenome|uncultured_microorganism|uncultured_organism|ecotype|biological_replicate|technical_replicate|interspecies_interaction_between_organisms	0	marine_abyssal_zone_biome	marine_oligotrophic_desert	mud	sediment	aerobe	https://www.qiagen.com/us/cmp/ecom/powersoilkits?COECM_MOBIO_Branded_1707_SEA_PowerSoil__&kwid=%2Bpower%20%2Bsoil%20%2Brna	https://github.com/FranckLejzerowicz/protocols	TruSeq_Nano_PCR_free_Library_Preparation_Kit_single-end	uchime_4.2	TRUE	15.8	F1-B	15-I	CACATGATAAGGGCACCACAAGAACGC	ATGTGCTCCCACCTATCACACAATCATG	FWD:_{AAGGGCACCACAAGAACGC}_REV:_{CCACCTATCACACAATCATG}	F1-B_15-I	CACATGATAAGGGCACCACAAGAACGC_ATGTGCTCCCACCTATCACACAATCATG	AB02_37F_DNA_B_1_1	1757175	TruSeq	normalized	2016-05-20		Illumina	MiSeq	none	Lane_MiSeq_37F	40	88.73	4	47	initial_denaturation:95_5;_denaturation:_94_0.5;_annealing:52_0.2;_elongation:_72_1;_40_cycles;_final_elongation:72_2	10.8	3.7	39.96
37F.DNA.7.A	CCCCCGGG	CCCCCGGG	18S_rRNA	37F	37F	DNA	7	A	No	MIMARKS-survey	DSMP	gene|marine_metagenome|uncultured_microorganism|uncultured_organism|ecotype|biological_replicate|technical_replicate|interspecies_interaction_between_organisms	0	marine_abyssal_zone_biome	marine_oligotrophic_desert	mud	sediment	aerobe	https://www.qiagen.com/us/cmp/ecom/powersoilkits?COECM_MOBIO_Branded_1707_SEA_PowerSoil__&kwid=%2Bpower%20%2Bsoil%20%2Brna	https://github.com/FranckLejzerowicz/protocols	TruSeq_Nano_PCR_free_Library_Preparation_Kit_single-end	uchime_4.2	TRUE	54	F1-A	15-A	CACACACAAAGGGCACCACAAGAACGC	AGACACACCCACCTATCACACAATCATG	FWD:_{AAGGGCACCACAAGAACGC}_REV:_{CCACCTATCACACAATCATG}	F1-A_15-A	CACACACAAAGGGCACCACAAGAACGC_AGACACACCCACCTATCACACAATCATG	DSMP_37F_DNA_A_1_1	15294031	TruSeq	normalized	2017-07-04	TruSeq1	Illumina	HiSeq_2500	none	lane_pool37F	30	22.46	4	42	initial_denaturation:95_5;_denaturation:_94_0.5;_annealing:52_0.2;_elongation:_72_1;_40_cycles;_final_elongation:72_2	7.4	4.05	29.97
37F.DNA.8.A	CCCCCGTC	CCCCCGTC	18S_rRNA	37F	37F	DNA	8	A	No	MIMARKS-survey	DSMP	gene|marine_metagenome|uncultured_microorganism|uncultured_organism|ecotype|biological_replicate|technical_replicate|interspecies_interaction_between_organisms	0	marine_abyssal_zone_biome	marine_oligotrophic_desert	mud	sediment	aerobe	https://www.qiagen.com/us/cmp/ecom/powersoilkits?COECM_MOBIO_Branded_1707_SEA_PowerSoil__&kwid=%2Bpower%20%2Bsoil%20%2Brna	https://github.com/FranckLejzerowicz/protocols	TruSeq_Nano_PCR_free_Library_Preparation_Kit_single-end	uchime_4.2	TRUE	36.6	F1-A	15-C	CACACACAAAGGGCACCACAAGAACGC	AGTCGCGTCCACCTATCACACAATCATG	FWD:_{AAGGGCACCACAAGAACGC}_REV:_{CCACCTATCACACAATCATG}	F1-A_15-C	CACACACAAAGGGCACCACAAGAACGC_AGTCGCGTCCACCTATCACACAATCATG	DSMP_37F_DNA_A_1_2	15316119	TruSeq	normalized	2017-07-04	TruSeq4	Illumina	HiSeq_2500	none	lane_pool37F	27	20.04	4	42	initial_denaturation:95_5;_denaturation:_94_0.5;_annealing:52_0.2;_elongation:_72_1;_40_cycles;_final_elongation:72_2	4.8	5.63	27.02
37F.DNA.8.B	CCCCCGTG	CCCCCGTG	18S_rRNA	37F	37F	DNA	8	B	No	MIMARKS-survey	DSMP	gene|marine_metagenome|uncultured_microorganism|uncultured_organism|ecotype|biological_replicate|technical_replicate|interspecies_interaction_between_organisms	0	marine_abyssal_zone_biome	marine_oligotrophic_desert	mud	sediment	aerobe	https://www.qiagen.com/us/cmp/ecom/powersoilkits?COECM_MOBIO_Branded_1707_SEA_PowerSoil__&kwid=%2Bpower%20%2Bsoil%20%2Brna	https://github.com/FranckLejzerowicz/protocols	TruSeq_Nano_PCR_free_Library_Preparation_Kit_single-end	uchime_4.2	TRUE	36.6	F1-A	15-C	CACACACAAAGGGCACCACAAGAACGC	AGTCGCGTCCACCTATCACACAATCATG	FWD:_{AAGGGCACCACAAGAACGC}_REV:_{CCACCTATCACACAATCATG}	F1-A_15-C	CACACACAAAGGGCACCACAAGAACGC_AGTCGCGTCCACCTATCACACAATCATG	DSMP_37F_DNA_B_1_3	1877212	TruSeq	normalized	2017-07-04	TruSeq10	Illumina	HiSeq_2500	none	lane_pool37F	40	535.96	4	41	initial_denaturation:95_5;_denaturation:_94_0.5;_annealing:52_0.2;_elongation:_72_1;_40_cycles;_final_elongation:72_2	3.9	10.26	40.01
37F.DNA.9.A	CCCCCGTT	CCCCCGTT	18S_rRNA	37F	37F	DNA	9	A	No	MIMARKS-survey	DSMP	gene|marine_metagenome|uncultured_microorganism|uncultured_organism|ecotype|biological_replicate|technical_replicate|interspecies_interaction_between_organisms	0	marine_abyssal_zone_biome	marine_oligotrophic_desert	mud	sediment	aerobe	https://www.qiagen.com/us/cmp/ecom/powersoilkits?COECM_MOBIO_Branded_1707_SEA_PowerSoil__&kwid=%2Bpower%20%2Bsoil%20%2Brna	https://github.com/FranckLejzerowicz/protocols	TruSeq_Nano_PCR_free_Library_Preparation_Kit_single-end	uchime_4.2	TRUE	46.4	F1-A	15-K	CACACACAAAGGGCACCACAAGAACGC	CATCGTACCCACCTATCACACAATCATG	FWD:_{AAGGGCACCACAAGAACGC}_REV:_{CCACCTATCACACAATCATG}	F1-A_15-K	CACACACAAAGGGCACCACAAGAACGC_CATCGTACCCACCTATCACACAATCATG	DSMP_37F_DNA_A_1_3	18703377	TruSeq	normalized	2017-07-04	TruSeq5	Illumina	HiSeq_2500	none	lane_pool37F	27.5	17.75	4	41	initial_denaturation:95_5;_denaturation:_94_0.5;_annealing:52_0.2;_elongation:_72_1;_40_cycles;_final_elongation:72_2	6.1	4.51	27.51
37F.DNA.9.B	CCCCCTCC	CCCCCTCC	18S_rRNA	37F	37F	DNA	9	B	No	MIMARKS-survey	DSMP	gene|marine_metagenome|uncultured_microorganism|uncultured_organism|ecotype|biological_replicate|technical_replicate|interspecies_interaction_between_organisms	0	marine_abyssal_zone_biome	marine_oligotrophic_desert	mud	sediment	aerobe	https://www.qiagen.com/us/cmp/ecom/powersoilkits?COECM_MOBIO_Branded_1707_SEA_PowerSoil__&kwid=%2Bpower%20%2Bsoil%20%2Brna	https://github.com/FranckLejzerowicz/protocols	TruSeq_Nano_PCR_free_Library_Preparation_Kit_single-end	uchime_4.2	TRUE	46.4	F1-A	15-K	CACACACAAAGGGCACCACAAGAACGC	CATCGTACCCACCTATCACACAATCATG	FWD:_{AAGGGCACCACAAGAACGC}_REV:_{CCACCTATCACACAATCATG}	F1-A_15-K	CACACACAAAGGGCACCACAAGAACGC_CATCGTACCCACCTATCACACAATCATG	DSMP_37F_DNA_B_1_2	2198874	TruSeq	normalized	2017-07-04	TruSeq9	Illumina	HiSeq_2500	none	lane_pool37F	40	307.78	4	42	initial_denaturation:95_5;_denaturation:_94_0.5;_annealing:52_0.2;_elongation:_72_1;_40_cycles;_final_elongation:72_2	3.9	10.26	40.01
37F.DNA.10.A	CCCCCTCG	CCCCCTCG	18S_rRNA	37F	37F	DNA	10	A	No	MIMARKS-survey	DSMP	gene|marine_metagenome|uncultured_microorganism|uncultured_organism|ecotype|biological_replicate|technical_replicate|interspecies_interaction_between_organisms	0	marine_abyssal_zone_biome	marine_oligotrophic_desert	mud	sediment	aerobe	https://www.qiagen.com/us/cmp/ecom/powersoilkits?COECM_MOBIO_Branded_1707_SEA_PowerSoil__&kwid=%2Bpower%20%2Bsoil%20%2Brna	https://github.com/FranckLejzerowicz/protocols	TruSeq_Nano_PCR_free_Library_Preparation_Kit_single-end	uchime_4.2	TRUE	38.2	F1-A	15-N	CACACACAAAGGGCACCACAAGAACGC	CGAGACGTCCACCTATCACACAATCATG	FWD:_{AAGGGCACCACAAGAACGC}_REV:_{CCACCTATCACACAATCATG}	F1-A_15-N	CACACACAAAGGGCACCACAAGAACGC_CGAGACGTCCACCTATCACACAATCATG	DSMP_37F_DNA_A_1_3	18703377	TruSeq	normalized	2017-07-04	TruSeq5	Illumina	HiSeq_2500	none	lane_pool37F	27.5	17.75	4	41	initial_denaturation:95_5;_denaturation:_94_0.5;_annealing:52_0.2;_elongation:_72_1;_40_cycles;_final_elongation:72_2	4.9	5.61	27.49
37F.DNA.10.B	CCCCCTCT	CCCCCTCT	18S_rRNA	37F	37F	DNA	10	B	No	MIMARKS-survey	DSMP	gene|marine_metagenome|uncultured_microorganism|uncultured_organism|ecotype|biological_replicate|technical_replicate|interspecies_interaction_between_organisms	0	marine_abyssal_zone_biome	marine_oligotrophic_desert	mud	sediment	aerobe	https://www.qiagen.com/us/cmp/ecom/powersoilkits?COECM_MOBIO_Branded_1707_SEA_PowerSoil__&kwid=%2Bpower%20%2Bsoil%20%2Brna	https://github.com/FranckLejzerowicz/protocols	TruSeq_Nano_PCR_free_Library_Preparation_Kit_single-end	uchime_4.2	TRUE	38.2	F1-A	15-N	CACACACAAAGGGCACCACAAGAACGC	CGAGACGTCCACCTATCACACAATCATG	FWD:_{AAGGGCACCACAAGAACGC}_REV:_{CCACCTATCACACAATCATG}	F1-A_15-N	CACACACAAAGGGCACCACAAGAACGC_CGAGACGTCCACCTATCACACAATCATG	DSMP_37F_DNA_B_1_1	2278945	TruSeq	normalized	2017-07-04	TruSeq8	Illumina	HiSeq_2500	none	lane_pool37F	40	337.28	4	42	initial_denaturation:95_5;_denaturation:_94_0.5;_annealing:52_0.2;_elongation:_72_1;_40_cycles;_final_elongation:72_2	3.3	12.12	40
37F.DNA.11.A	CCCCCTGC	CCCCCTGC	18S_rRNA	37F	37F	DNA	11	A	No	MIMARKS-survey	DSMP	gene|marine_metagenome|uncultured_microorganism|uncultured_organism|ecotype|biological_replicate|technical_replicate|interspecies_interaction_between_organisms	0	marine_abyssal_zone_biome	marine_oligotrophic_desert	mud	sediment	aerobe	https://www.qiagen.com/us/cmp/ecom/powersoilkits?COECM_MOBIO_Branded_1707_SEA_PowerSoil__&kwid=%2Bpower%20%2Bsoil%20%2Brna	https://github.com/FranckLejzerowicz/protocols	TruSeq_Nano_PCR_free_Library_Preparation_Kit_single-end	uchime_4.2	TRUE	46.9	F1-A	15-Q	CACACACAAAGGGCACCACAAGAACGC	CTGCACGCCCACCTATCACACAATCATG	FWD:_{AAGGGCACCACAAGAACGC}_REV:_{CCACCTATCACACAATCATG}	F1-A_15-Q	CACACACAAAGGGCACCACAAGAACGC_CTGCACGCCCACCTATCACACAATCATG	DSMP_37F_DNA_A_1_2	15316119	TruSeq	normalized	2017-07-04	TruSeq4	Illumina	HiSeq_2500	none	lane_pool37F	27	20.04	4	42	initial_denaturation:95_5;_denaturation:_94_0.5;_annealing:52_0.2;_elongation:_72_1;_40_cycles;_final_elongation:72_2	7.6	3.55	26.98
37F.DNA.11.B	CCCCCTGG	CCCCCTGG	18S_rRNA	37F	37F	DNA	11	B	No	MIMARKS-survey	DSMP	gene|marine_metagenome|uncultured_microorganism|uncultured_organism|ecotype|biological_replicate|technical_replicate|interspecies_interaction_between_organisms	0	marine_abyssal_zone_biome	marine_oligotrophic_desert	mud	sediment	aerobe	https://www.qiagen.com/us/cmp/ecom/powersoilkits?COECM_MOBIO_Branded_1707_SEA_PowerSoil__&kwid=%2Bpower%20%2Bsoil%20%2Brna	https://github.com/FranckLejzerowicz/protocols	TruSeq_Nano_PCR_free_Library_Preparation_Kit_single-end	uchime_4.2	TRUE	46.9	F1-A	15-Q	CACACACAAAGGGCACCACAAGAACGC	CTGCACGCCCACCTATCACACAATCATG	FWD:_{AAGGGCACCACAAGAACGC}_REV:_{CCACCTATCACACAATCATG}	F1-A_15-Q	CACACACAAAGGGCACCACAAGAACGC_CTGCACGCCCACCTATCACACAATCATG	DSMP_37F_DNA_B_1_2	2198874	TruSeq	normalized	2017-07-04	TruSeq9	Illumina	HiSeq_2500	none	lane_pool37F	40	307.78	4	42	initial_denaturation:95_5;_denaturation:_94_0.5;_annealing:52_0.2;_elongation:_72_1;_40_cycles;_final_elongation:72_2	7.4	5.41	40.03
37F.DNA.12.A	CCCCCTGT	CCCCCTGT	18S_rRNA	37F	37F	DNA	12	A	No	MIMARKS-survey	DSMP	gene|marine_metagenome|uncultured_microorganism|uncultured_organism|ecotype|biological_replicate|technical_replicate|interspecies_interaction_between_organisms	0	marine_abyssal_zone_biome	marine_oligotrophic_desert	mud	sediment	aerobe	https://www.qiagen.com/us/cmp/ecom/powersoilkits?COECM_MOBIO_Branded_1707_SEA_PowerSoil__&kwid=%2Bpower%20%2Bsoil%20%2Brna	https://github.com/FranckLejzerowicz/protocols	TruSeq_Nano_PCR_free_Library_Preparation_Kit_single-end	uchime_4.2	TRUE	40.6	F1-A	15-Z	CACACACAAAGGGCACCACAAGAACGC	TGTGCATGCCACCTATCACACAATCATG	FWD:_{AAGGGCACCACAAGAACGC}_REV:_{CCACCTATCACACAATCATG}	F1-A_15-Z	CACACACAAAGGGCACCACAAGAACGC_TGTGCATGCCACCTATCACACAATCATG	DSMP_37F_DNA_A_1_3	18703377	TruSeq	normalized	2017-07-04	TruSeq5	Illumina	HiSeq_2500	none	lane_pool37F	27.5	17.75	4	41	initial_denaturation:95_5;_denaturation:_94_0.5;_annealing:52_0.2;_elongation:_72_1;_40_cycles;_final_elongation:72_2	2.5	11	27.5
37F.DNA.12.B	CCCCCTTC	CCCCCTTC	18S_rRNA	37F	37F	DNA	12	B	No	MIMARKS-survey	DSMP	gene|marine_metagenome|uncultured_microorganism|uncultured_organism|ecotype|biological_replicate|technical_replicate|interspecies_interaction_between_organisms	0	marine_abyssal_zone_biome	marine_oligotrophic_desert	mud	sediment	aerobe	https://www.qiagen.com/us/cmp/ecom/powersoilkits?COECM_MOBIO_Branded_1707_SEA_PowerSoil__&kwid=%2Bpower%20%2Bsoil%20%2Brna	https://github.com/FranckLejzerowicz/protocols	TruSeq_Nano_PCR_free_Library_Preparation_Kit_single-end	uchime_4.2	TRUE	40.6	F1-A	15-Z	CACACACAAAGGGCACCACAAGAACGC	TGTGCATGCCACCTATCACACAATCATG	FWD:_{AAGGGCACCACAAGAACGC}_REV:_{CCACCTATCACACAATCATG}	F1-A_15-Z	CACACACAAAGGGCACCACAAGAACGC_TGTGCATGCCACCTATCACACAATCATG	DSMP_37F_DNA_B_1_3	1877212	TruSeq	normalized	2017-07-04	TruSeq10	Illumina	HiSeq_2500	none	lane_pool37F	40	535.96	4	41	initial_denaturation:95_5;_denaturation:_94_0.5;_annealing:52_0.2;_elongation:_72_1;_40_cycles;_final_elongation:72_2	5.1	7.84	39.98
37F.DNA.13.A	CCCCCTTG	CCCCCTTG	18S_rRNA	37F	37F	DNA	13	A	No	MIMARKS-survey	DSMP	gene|marine_metagenome|uncultured_microorganism|uncultured_organism|ecotype|biological_replicate|technical_replicate|interspecies_interaction_between_organisms	0	marine_abyssal_zone_biome	marine_oligotrophic_desert	mud	sediment	aerobe	https://www.qiagen.com/us/cmp/ecom/powersoilkits?COECM_MOBIO_Branded_1707_SEA_PowerSoil__&kwid=%2Bpower%20%2Bsoil%20%2Brna	https://github.com/FranckLejzerowicz/protocols	TruSeq_Nano_PCR_free_Library_Preparation_Kit_single-end	uchime_4.2	TRUE	15.3	F1-B	15-Q	CACATGATAAGGGCACCACAAGAACGC	CTGCACGCCCACCTATCACACAATCATG	FWD:_{AAGGGCACCACAAGAACGC}_REV:_{CCACCTATCACACAATCATG}	F1-B_15-Q	CACATGATAAGGGCACCACAAGAACGC_CTGCACGCCCACCTATCACACAATCATG	AB02_37F_DNA_A_1_1	2007312	TruSeq	normalized	2016-05-20		Illumina	MiSeq	none	Lane_MiSeq_37F	40	115.46	4	47	initial_denaturation:95_5;_denaturation:_94_0.5;_annealing:52_0.2;_elongation:_72_1;_40_cycles;_final_elongation:72_2	15	2.67	40.05
37F.DNA.13.B	CCCCCTTT	CCCCCTTT	18S_rRNA	37F	37F	DNA	13	B	No	MIMARKS-survey	DSMP	gene|marine_metagenome|uncultured_microorganism|uncultured_organism|ecotype|biological_replicate|technical_replicate|interspecies_interaction_between_organisms	0	marine_abyssal_zone_biome	marine_oligotrophic_desert	mud	sediment	aerobe	https://www.qiagen.com/us/cmp/ecom/powersoilkits?COECM_MOBIO_Branded_1707_SEA_PowerSoil__&kwid=%2Bpower%20%2Bsoil%20%2Brna	https://github.com/FranckLejzerowicz/protocols	TruSeq_Nano_PCR_free_Library_Preparation_Kit_single-end	uchime_4.2	TRUE	15.3	F1-B	15-Q	CACATGATAAGGGCACCACAAGAACGC	CTGCACGCCCACCTATCACACAATCATG	FWD:_{AAGGGCACCACAAGAACGC}_REV:_{CCACCTATCACACAATCATG}	F1-B_15-Q	CACATGATAAGGGCACCACAAGAACGC_CTGCACGCCCACCTATCACACAATCATG	AB02_37F_DNA_B_1_1	1757175	TruSeq	normalized	2016-05-20		Illumina	MiSeq	none	Lane_MiSeq_37F	40	88.73	4	47	initial_denaturation:95_5;_denaturation:_94_0.5;_annealing:52_0.2;_elongation:_72_1;_40_cycles;_final_elongation:72_2	14.2	2.82	40.04
37F.DNA.14.A	CCCCGCCC	CCCCGCCC	18S_rRNA	37F	37F	DNA	14	A	No	MIMARKS-survey	DSMP	gene|marine_metagenome|uncultured_microorganism|uncultured_organism|ecotype|biological_replicate|technical_replicate|interspecies_interaction_between_organisms	0	marine_abyssal_zone_biome	marine_oligotrophic_desert	mud	sediment	aerobe	https://www.qiagen.com/us/cmp/ecom/powersoilkits?COECM_MOBIO_Branded_1707_SEA_PowerSoil__&kwid=%2Bpower%20%2Bsoil%20%2Brna	https://github.com/FranckLejzerowicz/protocols	TruSeq_Nano_PCR_free_Library_Preparation_Kit_single-end	uchime_4.2	TRUE	15.7	F1-B	15-X	CACATGATAAGGGCACCACAAGAACGC	TGATGCATCCACCTATCACACAATCATG	FWD:_{AAGGGCACCACAAGAACGC}_REV:_{CCACCTATCACACAATCATG}	F1-B_15-X	CACATGATAAGGGCACCACAAGAACGC_TGATGCATCCACCTATCACACAATCATG	AB02_37F_DNA_A_1_1	2007312	TruSeq	normalized	2016-05-20		Illumina	MiSeq	none	Lane_MiSeq_37F	40	115.46	4	47	initial_denaturation:95_5;_denaturation:_94_0.5;_annealing:52_0.2;_elongation:_72_1;_40_cycles;_final_elongation:72_2	10.1	3.96	40
37F.DNA.14.B	CCCCGCCG	CCCCGCCG	18S_rRNA	37F	37F	DNA	14	B	No	MIMARKS-survey	DSMP	gene|marine_metagenome|uncultured_microorganism|uncultured_organism|ecotype|biological_replicate|technical_replicate|interspecies_interaction_between_organisms	0	marine_abyssal_zone_biome	marine_oligotrophic_desert	mud	sediment	aerobe	https://www.qiagen.com/us/cmp/ecom/powersoilkits?COECM_MOBIO_Branded_1707_SEA_PowerSoil__&kwid=%2Bpower%20%2Bsoil%20%2Brna	https://github.com/FranckLejzerowicz/protocols	TruSeq_Nano_PCR_free_Library_Preparation_Kit_single-end	uchime_4.2	TRUE	15.7	F1-B	15-X	CACATGATAAGGGCACCACAAGAACGC	TGATGCATCCACCTATCACACAATCATG	FWD:_{AAGGGCACCACAAGAACGC}_REV:_{CCACCTATCACACAATCATG}	F1-B_15-X	CACATGATAAGGGCACCACAAGAACGC_TGATGCATCCACCTATCACACAATCATG	AB02_37F_DNA_B_1_1	1757175	TruSeq	normalized	2016-05-20		Illumina	MiSeq	none	Lane_MiSeq_37F	40	88.73	4	47	initial_denaturation:95_5;_denaturation:_94_0.5;_annealing:52_0.2;_elongation:_72_1;_40_cycles;_final_elongation:72_2	10.1	3.96	40
37F.DNA.15.A	CCCCGCCT	CCCCGCCT	18S_rRNA	37F	37F	DNA	15	A	No	MIMARKS-survey	DSMP	gene|marine_metagenome|uncultured_microorganism|uncultured_organism|ecotype|biological_replicate|technical_replicate|interspecies_interaction_between_organisms	0	marine_abyssal_zone_biome	marine_oligotrophic_desert	mud	sediment	aerobe	https://www.qiagen.com/us/cmp/ecom/powersoilkits?COECM_MOBIO_Branded_1707_SEA_PowerSoil__&kwid=%2Bpower%20%2Bsoil%20%2Brna	https://github.com/FranckLejzerowicz/protocols	TruSeq_Nano_PCR_free_Library_Preparation_Kit_single-end	uchime_4.2	TRUE	13.2	F1-C	15-B	CACTGATCAAGGGCACCACAAGAACGC	AGATGATGCCACCTATCACACAATCATG	FWD:_{AAGGGCACCACAAGAACGC}_REV:_{CCACCTATCACACAATCATG}	F1-C_15-B	CACTGATCAAGGGCACCACAAGAACGC_AGATGATGCCACCTATCACACAATCATG	AB02_37F_DNA_A_1_1	2007312	TruSeq	normalized	2016-05-20		Illumina	MiSeq	none	Lane_MiSeq_37F	40	115.46	4	47	initial_denaturation:95_5;_denaturation:_94_0.5;_annealing:52_0.2;_elongation:_72_1;_40_cycles;_final_elongation:72_2	11.7	3.42	40.01
37F.DNA.15.B	CCCCGCGC	CCCCGCGC	18S_rRNA	37F	37F	DNA	15	B	No	MIMARKS-survey	DSMP	gene|marine_metagenome|uncultured_microorganism|uncultured_organism|ecotype|biological_replicate|technical_replicate|interspecies_interaction_between_organisms	0	marine_abyssal_zone_biome	marine_oligotrophic_desert	mud	sediment	aerobe	https://www.qiagen.com/us/cmp/ecom/powersoilkits?COECM_MOBIO_Branded_1707_SEA_PowerSoil__&kwid=%2Bpower%20%2Bsoil%20%2Brna	https://github.com/FranckLejzerowicz/protocols	TruSeq_Nano_PCR_free_Library_Preparation_Kit_single-end	uchime_4.2	TRUE	13.2	F1-C	15-B	CACTGATCAAGGGCACCACAAGAACGC	AGATGATGCCACCTATCACACAATCATG	FWD:_{AAGGGCACCACAAGAACGC}_REV:_{CCACCTATCACACAATCATG}	F1-C_15-B	CACTGATCAAGGGCACCACAAGAACGC_AGATGATGCCACCTATCACACAATCATG	AB02_37F_DNA_B_1_1	1757175	TruSeq	normalized	2016-05-20		Illumina	MiSeq	none	Lane_MiSeq_37F	40	88.73	4	47	initial_denaturation:95_5;_denaturation:_94_0.5;_annealing:52_0.2;_elongation:_72_1;_40_cycles;_final_elongation:72_2	12.2	3.28	40.02
37F.DNA.16.A	CCCCGCGG	CCCCGCGG	18S_rRNA	37F	37F	DNA	16	A	No	MIMARKS-survey	DSMP	gene|marine_metagenome|uncultured_microorganism|uncultured_organism|ecotype|biological_replicate|technical_replicate|interspecies_interaction_between_organisms	0	marine_abyssal_zone_biome	marine_oligotrophic_desert	mud	sediment	aerobe	https://www.qiagen.com/us/cmp/ecom/powersoilkits?COECM_MOBIO_Branded_1707_SEA_PowerSoil__&kwid=%2Bpower%20%2Bsoil%20%2Brna	https://github.com/FranckLejzerowicz/protocols	TruSeq_Nano_PCR_free_Library_Preparation_Kit_single-end	uchime_4.2	TRUE	16.4	F1-C	15-K	CACTGATCAAGGGCACCACAAGAACGC	CATCGTACCCACCTATCACACAATCATG	FWD:_{AAGGGCACCACAAGAACGC}_REV:_{CCACCTATCACACAATCATG}	F1-C_15-K	CACTGATCAAGGGCACCACAAGAACGC_CATCGTACCCACCTATCACACAATCATG	AB02_37F_DNA_A_1_1	2007312	TruSeq	normalized	2016-05-20		Illumina	MiSeq	none	Lane_MiSeq_37F	40	115.46	4	47	initial_denaturation:95_5;_denaturation:_94_0.5;_annealing:52_0.2;_elongation:_72_1;_40_cycles;_final_elongation:72_2	13	3.08	40.04
37F.DNA.16.B	CCCCGCGT	CCCCGCGT	18S_rRNA	37F	37F	DNA	16	B	No	MIMARKS-survey	DSMP	gene|marine_metagenome|uncultured_microorganism|uncultured_organism|ecotype|biological_replicate|technical_replicate|interspecies_interaction_between_organisms	0	marine_abyssal_zone_biome	marine_oligotrophic_desert	mud	sediment	aerobe	https://www.qiagen.com/us/cmp/ecom/powersoilkits?COECM_MOBIO_Branded_1707_SEA_PowerSoil__&kwid=%2Bpower%20%2Bsoil%20%2Brna	https://github.com/FranckLejzerowicz/protocols	TruSeq_Nano_PCR_free_Library_Preparation_Kit_single-end	uchime_4.2	TRUE	16.4	F1-C	15-K	CACTGATCAAGGGCACCACAAGAACGC	CATCGTACCCACCTATCACACAATCATG	FWD:_{AAGGGCACCACAAGAACGC}_REV:_{CCACCTATCACACAATCATG}	F1-C_15-K	CACTGATCAAGGGCACCACAAGAACGC_CATCGTACCCACCTATCACACAATCATG	AB02_37F_DNA_B_1_1	1757175	TruSeq	normalized	2016-05-20		Illumina	MiSeq	none	Lane_MiSeq_37F	40	88.73	4	47	initial_denaturation:95_5;_denaturation:_94_0.5;_annealing:52_0.2;_elongation:_72_1;_40_cycles;_final_elongation:72_2	12.6	3.17	39.94
37F.DNA.17.A	CCCCGCTC	CCCCGCTC	18S_rRNA	37F	37F	DNA	17	A	No	MIMARKS-survey	DSMP	gene|marine_metagenome|uncultured_microorganism|uncultured_organism|ecotype|biological_replicate|technical_replicate|interspecies_interaction_between_organisms	0	marine_abyssal_zone_biome	marine_oligotrophic_desert	mud	sediment	aerobe	https://www.qiagen.com/us/cmp/ecom/powersoilkits?COECM_MOBIO_Branded_1707_SEA_PowerSoil__&kwid=%2Bpower%20%2Bsoil%20%2Brna	https://github.com/FranckLejzerowicz/protocols	TruSeq_Nano_PCR_free_Library_Preparation_Kit_single-end	uchime_4.2	TRUE	16.1	F1-C	15-W	CACTGATCAAGGGCACCACAAGAACGC	TGATATGCCCACCTATCACACAATCATG	FWD:_{AAGGGCACCACAAGAACGC}_REV:_{CCACCTATCACACAATCATG}	F1-C_15-W	CACTGATCAAGGGCACCACAAGAACGC_TGATATGCCCACCTATCACACAATCATG	AB02_37F_DNA_A_1_1	2007312	TruSeq	normalized	2016-05-20		Illumina	MiSeq	none	Lane_MiSeq_37F	40	115.46	4	47	initial_denaturation:95_5;_denaturation:_94_0.5;_annealing:52_0.2;_elongation:_72_1;_40_cycles;_final_elongation:72_2	9.71	4.12	40.01
37F.DNA.17.B	CCCCGCTG	CCCCGCTG	18S_rRNA	37F	37F	DNA	17	B	No	MIMARKS-survey	DSMP	gene|marine_metagenome|uncultured_microorganism|uncultured_organism|ecotype|biological_replicate|technical_replicate|interspecies_interaction_between_organisms	0	marine_abyssal_zone_biome	marine_oligotrophic_desert	mud	sediment	aerobe	https://www.qiagen.com/us/cmp/ecom/powersoilkits?COECM_MOBIO_Branded_1707_SEA_PowerSoil__&kwid=%2Bpower%20%2Bsoil%20%2Brna	https://github.com/FranckLejzerowicz/protocols	TruSeq_Nano_PCR_free_Library_Preparation_Kit_single-end	uchime_4.2	TRUE	16.1	F1-C	15-W	CACTGATCAAGGGCACCACAAGAACGC	TGATATGCCCACCTATCACACAATCATG	FWD:_{AAGGGCACCACAAGAACGC}_REV:_{CCACCTATCACACAATCATG}	F1-C_15-W	CACTGATCAAGGGCACCACAAGAACGC_TGATATGCCCACCTATCACACAATCATG	AB02_37F_DNA_B_1_1	1757175	TruSeq	normalized	2016-05-20		Illumina	MiSeq	none	Lane_MiSeq_37F	40	88.73	4	47	initial_denaturation:95_5;_denaturation:_94_0.5;_annealing:52_0.2;_elongation:_72_1;_40_cycles;_final_elongation:72_2	9.95	4.02	40
37F.DNA.18.A	CCCCGCTT	CCCCGCTT	18S_rRNA	37F	37F	DNA	18	A	No	MIMARKS-survey	DSMP	gene|marine_metagenome|uncultured_microorganism|uncultured_organism|ecotype|biological_replicate|technical_replicate|interspecies_interaction_between_organisms	0	marine_abyssal_zone_biome	marine_oligotrophic_desert	mud	sediment	aerobe	https://www.qiagen.com/us/cmp/ecom/powersoilkits?COECM_MOBIO_Branded_1707_SEA_PowerSoil__&kwid=%2Bpower%20%2Bsoil%20%2Brna	https://github.com/FranckLejzerowicz/protocols	TruSeq_Nano_PCR_free_Library_Preparation_Kit_single-end	uchime_4.2	TRUE	15.6	F1-C	15-Z	CACTGATCAAGGGCACCACAAGAACGC	TGTGCATGCCACCTATCACACAATCATG	FWD:_{AAGGGCACCACAAGAACGC}_REV:_{CCACCTATCACACAATCATG}	F1-C_15-Z	CACTGATCAAGGGCACCACAAGAACGC_TGTGCATGCCACCTATCACACAATCATG	AB02_37F_DNA_A_1_1	2007312	TruSeq	normalized	2016-05-20		Illumina	MiSeq	none	Lane_MiSeq_37F	40	115.46	4	47	initial_denaturation:95_5;_denaturation:_94_0.5;_annealing:52_0.2;_elongation:_72_1;_40_cycles;_final_elongation:72_2	11.4	3.51	40.01
37F.DNA.18.B	CCCCGGCC	CCCCGGCC	18S_rRNA	37F	37F	DNA	18	B	No	MIMARKS-survey	DSMP	gene|marine_metagenome|uncultured_microorganism|uncultured_organism|ecotype|biological_replicate|technical_replicate|interspecies_interaction_between_organisms	0	marine_abyssal_zone_biome	marine_oligotrophic_desert	mud	sediment	aerobe	https://www.qiagen.com/us/cmp/ecom/powersoilkits?COECM_MOBIO_Branded_1707_SEA_PowerSoil__&kwid=%2Bpower%20%2Bsoil%20%2Brna	https://github.com/FranckLejzerowicz/protocols	TruSeq_Nano_PCR_free_Library_Preparation_Kit_single-end	uchime_4.2	TRUE	15.6	F1-C	15-Z	CACTGATCAAGGGCACCACAAGAACGC	TGTGCATGCCACCTATCACACAATCATG	FWD:_{AAGGGCACCACAAGAACGC}_REV:_{CCACCTATCACACAATCATG}	F1-C_15-Z	CACTGATCAAGGGCACCACAAGAACGC_TGTGCATGCCACCTATCACACAATCATG	AB02_37F_DNA_B_1_1	1757175	TruSeq	normalized	2016-05-20		Illumina	MiSeq	none	Lane_MiSeq_37F	40	88.73	4	47	initial_denaturation:95_5;_denaturation:_94_0.5;_annealing:52_0.2;_elongation:_72_1;_40_cycles;_final_elongation:72_2	10.3	3.88	39.96
37F.DNA.19.A	CCCCGGCG	CCCCGGCG	18S_rRNA	37F	37F	DNA	19	A	No	MIMARKS-survey	DSMP	gene|marine_metagenome|uncultured_microorganism|uncultured_organism|ecotype|biological_replicate|technical_replicate|interspecies_interaction_between_organisms	0	marine_abyssal_zone_biome	marine_oligotrophic_desert	mud	sediment	aerobe	https://www.qiagen.com/us/cmp/ecom/powersoilkits?COECM_MOBIO_Branded_1707_SEA_PowerSoil__&kwid=%2Bpower%20%2Bsoil%20%2Brna	https://github.com/FranckLejzerowicz/protocols	TruSeq_Nano_PCR_free_Library_Preparation_Kit_single-end	uchime_4.2	TRUE	16.3	F1-D	15-A	CAGCGTACAAGGGCACCACAAGAACGC	AGACACACCCACCTATCACACAATCATG	FWD:_{AAGGGCACCACAAGAACGC}_REV:_{CCACCTATCACACAATCATG}	F1-D_15-A	CAGCGTACAAGGGCACCACAAGAACGC_AGACACACCCACCTATCACACAATCATG	AB02_37F_DNA_A_1_1	2007312	TruSeq	normalized	2016-05-20		Illumina	MiSeq	none	Lane_MiSeq_37F	40	115.46	4	47	initial_denaturation:95_5;_denaturation:_94_0.5;_annealing:52_0.2;_elongation:_72_1;_40_cycles;_final_elongation:72_2	17.6	2.27	39.95
37F.DNA.19.B	CCCCGGCT	CCCCGGCT	18S_rRNA	37F	37F	DNA	19	B	No	MIMARKS-survey	DSMP	gene|marine_metagenome|uncultured_microorganism|uncultured_organism|ecotype|biological_replicate|technical_replicate|interspecies_interaction_between_organisms	0	marine_abyssal_zone_biome	marine_oligotrophic_desert	mud	sediment	aerobe	https://www.qiagen.com/us/cmp/ecom/powersoilkits?COECM_MOBIO_Branded_1707_SEA_PowerSoil__&kwid=%2Bpower%20%2Bsoil%20%2Brna	https://github.com/FranckLejzerowicz/protocols	TruSeq_Nano_PCR_free_Library_Preparation_Kit_single-end	uchime_4.2	TRUE	16.3	F1-D	15-A	CAGCGTACAAGGGCACCACAAGAACGC	AGACACACCCACCTATCACACAATCATG	FWD:_{AAGGGCACCACAAGAACGC}_REV:_{CCACCTATCACACAATCATG}	F1-D_15-A	CAGCGTACAAGGGCACCACAAGAACGC_AGACACACCCACCTATCACACAATCATG	AB02_37F_DNA_B_1_1	1757175	TruSeq	normalized	2016-05-20		Illumina	MiSeq	none	Lane_MiSeq_37F	40	88.73	4	47	initial_denaturation:95_5;_denaturation:_94_0.5;_annealing:52_0.2;_elongation:_72_1;_40_cycles;_final_elongation:72_2	17.2	2.33	40.08
37F.DNA.20.A	CCCCGGGC	CCCCGGGC	18S_rRNA	37F	37F	DNA	20	A	No	MIMARKS-survey	DSMP	gene|marine_metagenome|uncultured_microorganism|uncultured_organism|ecotype|biological_replicate|technical_replicate|interspecies_interaction_between_organisms	0	marine_abyssal_zone_biome	marine_oligotrophic_desert	mud	sediment	aerobe	https://www.qiagen.com/us/cmp/ecom/powersoilkits?COECM_MOBIO_Branded_1707_SEA_PowerSoil__&kwid=%2Bpower%20%2Bsoil%20%2Brna	https://github.com/FranckLejzerowicz/protocols	TruSeq_Nano_PCR_free_Library_Preparation_Kit_single-end	uchime_4.2	TRUE	16.1	F1-D	15-G	CAGCGTACAAGGGCACCACAAGAACGC	ATGCGTAGCCACCTATCACACAATCATG	FWD:_{AAGGGCACCACAAGAACGC}_REV:_{CCACCTATCACACAATCATG}	F1-D_15-G	CAGCGTACAAGGGCACCACAAGAACGC_ATGCGTAGCCACCTATCACACAATCATG	AB02_37F_DNA_A_1_1	2007312	TruSeq	normalized	2016-05-20		Illumina	MiSeq	none	Lane_MiSeq_37F	40	115.46	4	47	initial_denaturation:95_5;_denaturation:_94_0.5;_annealing:52_0.2;_elongation:_72_1;_40_cycles;_final_elongation:72_2	12.6	3.17	39.94
37F.DNA.20.B	CCCCGGGG	CCCCGGGG	18S_rRNA	37F	37F	DNA	20	B	No	MIMARKS-survey	DSMP	gene|marine_metagenome|uncultured_microorganism|uncultured_organism|ecotype|biological_replicate|technical_replicate|interspecies_interaction_between_organisms	0	marine_abyssal_zone_biome	marine_oligotrophic_desert	mud	sediment	aerobe	https://www.qiagen.com/us/cmp/ecom/powersoilkits?COECM_MOBIO_Branded_1707_SEA_PowerSoil__&kwid=%2Bpower%20%2Bsoil%20%2Brna	https://github.com/FranckLejzerowicz/protocols	TruSeq_Nano_PCR_free_Library_Preparation_Kit_single-end	uchime_4.2	TRUE	16.1	F1-D	15-G	CAGCGTACAAGGGCACCACAAGAACGC	ATGCGTAGCCACCTATCACACAATCATG	FWD:_{AAGGGCACCACAAGAACGC}_REV:_{CCACCTATCACACAATCATG}	F1-D_15-G	CAGCGTACAAGGGCACCACAAGAACGC_ATGCGTAGCCACCTATCACACAATCATG	AB02_37F_DNA_B_1_1	1757175	TruSeq	normalized	2016-05-20		Illumina	MiSeq	none	Lane_MiSeq_37F	40	88.73	4	47	initial_denaturation:95_5;_denaturation:_94_0.5;_annealing:52_0.2;_elongation:_72_1;_40_cycles;_final_elongation:72_2	12.5	3.2	40
37F.DNA.21.A	CCCCGGGT	CCCCGGGT	18S_rRNA	37F	37F	DNA	21	A	No	MIMARKS-survey	DSMP	gene|marine_metagenome|uncultured_microorganism|uncultured_organism|ecotype|biological_replicate|technical_replicate|interspecies_interaction_between_organisms	0	marine_abyssal_zone_biome	marine_oligotrophic_desert	mud	sediment	aerobe	https://www.qiagen.com/us/cmp/ecom/powersoilkits?COECM_MOBIO_Branded_1707_SEA_PowerSoil__&kwid=%2Bpower%20%2Bsoil%20%2Brna	https://github.com/FranckLejzerowicz/protocols	TruSeq_Nano_PCR_free_Library_Preparation_Kit_single-end	uchime_4.2	TRUE	16.4	F1-D	15-N	CAGCGTACAAGGGCACCACAAGAACGC	CGAGACGTCCACCTATCACACAATCATG	FWD:_{AAGGGCACCACAAGAACGC}_REV:_{CCACCTATCACACAATCATG}	F1-D_15-N	CAGCGTACAAGGGCACCACAAGAACGC_CGAGACGTCCACCTATCACACAATCATG	AB02_37F_DNA_A_1_1	2007312	TruSeq	normalized	2016-05-20		Illumina	MiSeq	none	Lane_MiSeq_37F	40	115.46	4	47	initial_denaturation:95_5;_denaturation:_94_0.5;_annealing:52_0.2;_elongation:_72_1;_40_cycles;_final_elongation:72_2	15	2.67	40.05
37F.DNA.21.B	CCCCGGTC	CCCCGGTC	18S_rRNA	37F	37F	DNA	21	B	No	MIMARKS-survey	DSMP	gene|marine_metagenome|uncultured_microorganism|uncultured_organism|ecotype|biological_replicate|technical_replicate|interspecies_interaction_between_organisms	0	marine_abyssal_zone_biome	marine_oligotrophic_desert	mud	sediment	aerobe	https://www.qiagen.com/us/cmp/ecom/powersoilkits?COECM_MOBIO_Branded_1707_SEA_PowerSoil__&kwid=%2Bpower%20%2Bsoil%20%2Brna	https://github.com/FranckLejzerowicz/protocols	TruSeq_Nano_PCR_free_Library_Preparation_Kit_single-end	uchime_4.2	TRUE	16.4	F1-D	15-N	CAGCGTACAAGGGCACCACAAGAACGC	CGAGACGTCCACCTATCACACAATCATG	FWD:_{AAGGGCACCACAAGAACGC}_REV:_{CCACCTATCACACAATCATG}	F1-D_15-N	CAGCGTACAAGGGCACCACAAGAACGC_CGAGACGTCCACCTATCACACAATCATG	AB02_37F_DNA_B_1_1	1757175	TruSeq	normalized	2016-05-20		Illumina	MiSeq	none	Lane_MiSeq_37F	40	88.73	4	47	initial_denaturation:95_5;_denaturation:_94_0.5;_annealing:52_0.2;_elongation:_72_1;_40_cycles;_final_elongation:72_2	15.6	2.56	39.94
37F.DNA.22.A	CCCCGGTG	CCCCGGTG	18S_rRNA	37F	37F	DNA	22	A	No	MIMARKS-survey	DSMP	gene|marine_metagenome|uncultured_microorganism|uncultured_organism|ecotype|biological_replicate|technical_replicate|interspecies_interaction_between_organisms	0	marine_abyssal_zone_biome	marine_oligotrophic_desert	mud	sediment	aerobe	https://www.qiagen.com/us/cmp/ecom/powersoilkits?COECM_MOBIO_Branded_1707_SEA_PowerSoil__&kwid=%2Bpower%20%2Bsoil%20%2Brna	https://github.com/FranckLejzerowicz/protocols	TruSeq_Nano_PCR_free_Library_Preparation_Kit_single-end	uchime_4.2	TRUE	15.9	F1-D	15-T	CAGCGTACAAGGGCACCACAAGAACGC	TAGTGAGCCCACCTATCACACAATCATG	FWD:_{AAGGGCACCACAAGAACGC}_REV:_{CCACCTATCACACAATCATG}	F1-D_15-T	CAGCGTACAAGGGCACCACAAGAACGC_TAGTGAGCCCACCTATCACACAATCATG	AB02_37F_DNA_A_1_1	2007312	TruSeq	normalized	2016-05-20		Illumina	MiSeq	none	Lane_MiSeq_37F	40	115.46	4	47	initial_denaturation:95_5;_denaturation:_94_0.5;_annealing:52_0.2;_elongation:_72_1;_40_cycles;_final_elongation:72_2	11.9	3.36	39.98
37F.DNA.22.B	CCCCGGTT	CCCCGGTT	18S_rRNA	37F	37F	DNA	22	B	No	MIMARKS-survey	DSMP	gene|marine_metagenome|uncultured_microorganism|uncultured_organism|ecotype|biological_replicate|technical_replicate|interspecies_interaction_between_organisms	0	marine_abyssal_zone_biome	marine_oligotrophic_desert	mud	sediment	aerobe	https://www.qiagen.com/us/cmp/ecom/powersoilkits?COECM_MOBIO_Branded_1707_SEA_PowerSoil__&kwid=%2Bpower%20%2Bsoil%20%2Brna	https://github.com/FranckLejzerowicz/protocols	TruSeq_Nano_PCR_free_Library_Preparation_Kit_single-end	uchime_4.2	TRUE	15.9	F1-D	15-T	CAGCGTACAAGGGCACCACAAGAACGC	TAGTGAGCCCACCTATCACACAATCATG	FWD:_{AAGGGCACCACAAGAACGC}_REV:_{CCACCTATCACACAATCATG}	F1-D_15-T	CAGCGTACAAGGGCACCACAAGAACGC_TAGTGAGCCCACCTATCACACAATCATG	AB02_37F_DNA_B_1_1	1757175	TruSeq	normalized	2016-05-20		Illumina	MiSeq	none	Lane_MiSeq_37F	40	88.73	4	47	initial_denaturation:95_5;_denaturation:_94_0.5;_annealing:52_0.2;_elongation:_72_1;_40_cycles;_final_elongation:72_2	11.8	3.39	40
37F.DNA.23.A	CCCCGTCC	CCCCGTCC	18S_rRNA	37F	37F	DNA	23	A	No	MIMARKS-survey	DSMP	gene|marine_metagenome|uncultured_microorganism|uncultured_organism|ecotype|biological_replicate|technical_replicate|interspecies_interaction_between_organisms	0	marine_abyssal_zone_biome	marine_oligotrophic_desert	mud	sediment	aerobe	https://www.qiagen.com/us/cmp/ecom/powersoilkits?COECM_MOBIO_Branded_1707_SEA_PowerSoil__&kwid=%2Bpower%20%2Bsoil%20%2Brna	https://github.com/FranckLejzerowicz/protocols	TruSeq_Nano_PCR_free_Library_Preparation_Kit_single-end	uchime_4.2	TRUE	14.1	F1-E	15-P	CAGTCGTAAAGGGCACCACAAGAACGC	CTAGCATCCCACCTATCACACAATCATG	FWD:_{AAGGGCACCACAAGAACGC}_REV:_{CCACCTATCACACAATCATG}	F1-E_15-P	CAGTCGTAAAGGGCACCACAAGAACGC_CTAGCATCCCACCTATCACACAATCATG	AB02_37F_DNA_A_1_1	2007312	TruSeq	normalized	2016-05-20		Illumina	MiSeq	none	Lane_MiSeq_37F	40	115.46	4	47	initial_denaturation:95_5;_denaturation:_94_0.5;_annealing:52_0.2;_elongation:_72_1;_40_cycles;_final_elongation:72_2	11.6	3.45	40.02
37F.DNA.23.B	CCCCGTCG	CCCCGTCG	18S_rRNA	37F	37F	DNA	23	B	No	MIMARKS-survey	DSMP	gene|marine_metagenome|uncultured_microorganism|uncultured_organism|ecotype|biological_replicate|technical_replicate|interspecies_interaction_between_organisms	0	marine_abyssal_zone_biome	marine_oligotrophic_desert	mud	sediment	aerobe	https://www.qiagen.com/us/cmp/ecom/powersoilkits?COECM_MOBIO_Branded_1707_SEA_PowerSoil__&kwid=%2Bpower%20%2Bsoil%20%2Brna	https://github.com/FranckLejzerowicz/protocols	TruSeq_Nano_PCR_free_Library_Preparation_Kit_single-end	uchime_4.2	TRUE	14.1	F1-E	15-P	CAGTCGTAAAGGGCACCACAAGAACGC	CTAGCATCCCACCTATCACACAATCATG	FWD:_{AAGGGCACCACAAGAACGC}_REV:_{CCACCTATCACACAATCATG}	F1-E_15-P	CAGTCGTAAAGGGCACCACAAGAACGC_CTAGCATCCCACCTATCACACAATCATG	AB02_37F_DNA_B_1_1	1757175	TruSeq	normalized	2016-05-20		Illumina	MiSeq	none	Lane_MiSeq_37F	40	88.73	4	47	initial_denaturation:95_5;_denaturation:_94_0.5;_annealing:52_0.2;_elongation:_72_1;_40_cycles;_final_elongation:72_2	12.9	3.1	39.99
37F.DNA.24.A	CCCCGTCT	CCCCGTCT	18S_rRNA	37F	37F	DNA	24	A	No	MIMARKS-survey	DSMP	gene|marine_metagenome|uncultured_microorganism|uncultured_organism|ecotype|biological_replicate|technical_replicate|interspecies_interaction_between_organisms	0	marine_abyssal_zone_biome	marine_oligotrophic_desert	mud	sediment	aerobe	https://www.qiagen.com/us/cmp/ecom/powersoilkits?COECM_MOBIO_Branded_1707_SEA_PowerSoil__&kwid=%2Bpower%20%2Bsoil%20%2Brna	https://github.com/FranckLejzerowicz/protocols	TruSeq_Nano_PCR_free_Library_Preparation_Kit_single-end	uchime_4.2	TRUE	15.4	F1-E	15-S	CAGTCGTAAAGGGCACCACAAGAACGC	TAGCATGTCCACCTATCACACAATCATG	FWD:_{AAGGGCACCACAAGAACGC}_REV:_{CCACCTATCACACAATCATG}	F1-E_15-S	CAGTCGTAAAGGGCACCACAAGAACGC_TAGCATGTCCACCTATCACACAATCATG	AB02_37F_DNA_A_1_1	2007312	TruSeq	normalized	2016-05-20		Illumina	MiSeq	none	Lane_MiSeq_37F	40	115.46	4	47	initial_denaturation:95_5;_denaturation:_94_0.5;_annealing:52_0.2;_elongation:_72_1;_40_cycles;_final_elongation:72_2	9.94	4.02	39.96
37F.DNA.24.B	CCCCGTGC	CCCCGTGC	18S_rRNA	37F	37F	DNA	24	B	No	MIMARKS-survey	DSMP	gene|marine_metagenome|uncultured_microorganism|uncultured_organism|ecotype|biological_replicate|technical_replicate|interspecies_interaction_between_organisms	0	marine_abyssal_zone_biome	marine_oligotrophic_desert	mud	sediment	aerobe	https://www.qiagen.com/us/cmp/ecom/powersoilkits?COECM_MOBIO_Branded_1707_SEA_PowerSoil__&kwid=%2Bpower%20%2Bsoil%20%2Brna	https://github.com/FranckLejzerowicz/protocols	TruSeq_Nano_PCR_free_Library_Preparation_Kit_single-end	uchime_4.2	TRUE	15.4	F1-E	15-S	CAGTCGTAAAGGGCACCACAAGAACGC	TAGCATGTCCACCTATCACACAATCATG	FWD:_{AAGGGCACCACAAGAACGC}_REV:_{CCACCTATCACACAATCATG}	F1-E_15-S	CAGTCGTAAAGGGCACCACAAGAACGC_TAGCATGTCCACCTATCACACAATCATG	AB02_37F_DNA_B_1_1	1757175	TruSeq	normalized	2016-05-20		Illumina	MiSeq	none	Lane_MiSeq_37F	40	88.73	4	47	initial_denaturation:95_5;_denaturation:_94_0.5;_annealing:52_0.2;_elongation:_72_1;_40_cycles;_final_elongation:72_2	9.77	4.09	39.96
37F.DNA.25.A	CCCCGTGG	CCCCGTGG	18S_rRNA	37F	37F	DNA	25	A	No	MIMARKS-survey	DSMP	gene|marine_metagenome|uncultured_microorganism|uncultured_organism|ecotype|biological_replicate|technical_replicate|interspecies_interaction_between_organisms	0	marine_abyssal_zone_biome	marine_oligotrophic_desert	mud	sediment	aerobe	https://www.qiagen.com/us/cmp/ecom/powersoilkits?COECM_MOBIO_Branded_1707_SEA_PowerSoil__&kwid=%2Bpower%20%2Bsoil%20%2Brna	https://github.com/FranckLejzerowicz/protocols	TruSeq_Nano_PCR_free_Library_Preparation_Kit_single-end	uchime_4.2	TRUE	14.9	F1-E	15-U	CAGTCGTAAAGGGCACCACAAGAACGC	TATCGCTGCCACCTATCACACAATCATG	FWD:_{AAGGGCACCACAAGAACGC}_REV:_{CCACCTATCACACAATCATG}	F1-E_15-U	CAGTCGTAAAGGGCACCACAAGAACGC_TATCGCTGCCACCTATCACACAATCATG	AB02_37F_DNA_A_1_1	2007312	TruSeq	normalized	2016-05-20		Illumina	MiSeq	none	Lane_MiSeq_37F	40	115.46	4	47	initial_denaturation:95_5;_denaturation:_94_0.5;_annealing:52_0.2;_elongation:_72_1;_40_cycles;_final_elongation:72_2	10.8	3.7	39.96
37F.DNA.25.B	CCCCGTGT	CCCCGTGT	18S_rRNA	37F	37F	DNA	25	B	No	MIMARKS-survey	DSMP	gene|marine_metagenome|uncultured_microorganism|uncultured_organism|ecotype|biological_replicate|technical_replicate|interspecies_interaction_between_organisms	0	marine_abyssal_zone_biome	marine_oligotrophic_desert	mud	sediment	aerobe	https://www.qiagen.com/us/cmp/ecom/powersoilkits?COECM_MOBIO_Branded_1707_SEA_PowerSoil__&kwid=%2Bpower%20%2Bsoil%20%2Brna	https://github.com/FranckLejzerowicz/protocols	TruSeq_Nano_PCR_free_Library_Preparation_Kit_single-end	uchime_4.2	TRUE	14.9	F1-E	15-U	CAGTCGTAAAGGGCACCACAAGAACGC	TATCGCTGCCACCTATCACACAATCATG	FWD:_{AAGGGCACCACAAGAACGC}_REV:_{CCACCTATCACACAATCATG}	F1-E_15-U	CAGTCGTAAAGGGCACCACAAGAACGC_TATCGCTGCCACCTATCACACAATCATG	AB02_37F_DNA_B_1_1	1757175	TruSeq	normalized	2016-05-20		Illumina	MiSeq	none	Lane_MiSeq_37F	40	88.73	4	47	initial_denaturation:95_5;_denaturation:_94_0.5;_annealing:52_0.2;_elongation:_72_1;_40_cycles;_final_elongation:72_2	10.9	3.67	40
37F.DNA.26.A	CCCCGTTC	CCCCGTTC	18S_rRNA	37F	37F	DNA	26	A	No	MIMARKS-survey	DSMP	gene|marine_metagenome|uncultured_microorganism|uncultured_organism|ecotype|biological_replicate|technical_replicate|interspecies_interaction_between_organisms	0	marine_abyssal_zone_biome	marine_oligotrophic_desert	mud	sediment	aerobe	https://www.qiagen.com/us/cmp/ecom/powersoilkits?COECM_MOBIO_Branded_1707_SEA_PowerSoil__&kwid=%2Bpower%20%2Bsoil%20%2Brna	https://github.com/FranckLejzerowicz/protocols	TruSeq_Nano_PCR_free_Library_Preparation_Kit_single-end	uchime_4.2	TRUE	15.2	F1-E	15-Y	CAGTCGTAAAGGGCACCACAAGAACGC	TGTCATAGCCACCTATCACACAATCATG	FWD:_{AAGGGCACCACAAGAACGC}_REV:_{CCACCTATCACACAATCATG}	F1-E_15-Y	CAGTCGTAAAGGGCACCACAAGAACGC_TGTCATAGCCACCTATCACACAATCATG	AB02_37F_DNA_A_1_1	2007312	TruSeq	normalized	2016-05-20		Illumina	MiSeq	none	Lane_MiSeq_37F	40	115.46	4	47	initial_denaturation:95_5;_denaturation:_94_0.5;_annealing:52_0.2;_elongation:_72_1;_40_cycles;_final_elongation:72_2	9.53	4.2	40.03
37F.DNA.26.B	CCCCGTTG	CCCCGTTG	18S_rRNA	37F	37F	DNA	26	B	No	MIMARKS-survey	DSMP	gene|marine_metagenome|uncultured_microorganism|uncultured_organism|ecotype|biological_replicate|technical_replicate|interspecies_interaction_between_organisms	0	marine_abyssal_zone_biome	marine_oligotrophic_desert	mud	sediment	aerobe	https://www.qiagen.com/us/cmp/ecom/powersoilkits?COECM_MOBIO_Branded_1707_SEA_PowerSoil__&kwid=%2Bpower%20%2Bsoil%20%2Brna	https://github.com/FranckLejzerowicz/protocols	TruSeq_Nano_PCR_free_Library_Preparation_Kit_single-end	uchime_4.2	TRUE	15.2	F1-E	15-Y	CAGTCGTAAAGGGCACCACAAGAACGC	TGTCATAGCCACCTATCACACAATCATG	FWD:_{AAGGGCACCACAAGAACGC}_REV:_{CCACCTATCACACAATCATG}	F1-E_15-Y	CAGTCGTAAAGGGCACCACAAGAACGC_TGTCATAGCCACCTATCACACAATCATG	AB02_37F_DNA_B_1_1	1757175	TruSeq	normalized	2016-05-20		Illumina	MiSeq	none	Lane_MiSeq_37F	40	88.73	4	47	initial_denaturation:95_5;_denaturation:_94_0.5;_annealing:52_0.2;_elongation:_72_1;_40_cycles;_final_elongation:72_2	9.73	4.11	39.99
37F.DNA.27.A	CCCCGTTT	CCCCGTTT	18S_rRNA	37F	37F	DNA	27	A	No	MIMARKS-survey	DSMP	gene|marine_metagenome|uncultured_microorganism|uncultured_organism|ecotype|biological_replicate|technical_replicate|interspecies_interaction_between_organisms	0	marine_abyssal_zone_biome	marine_oligotrophic_desert	mud	sediment	aerobe	https://www.qiagen.com/us/cmp/ecom/powersoilkits?COECM_MOBIO_Branded_1707_SEA_PowerSoil__&kwid=%2Bpower%20%2Bsoil%20%2Brna	https://github.com/FranckLejzerowicz/protocols	TruSeq_Nano_PCR_free_Library_Preparation_Kit_single-end	uchime_4.2	TRUE	15.7	F1-F	15-J	CGATCTACAAGGGCACCACAAGAACGC	CAGTGCAGCCACCTATCACACAATCATG	FWD:_{AAGGGCACCACAAGAACGC}_REV:_{CCACCTATCACACAATCATG}	F1-F_15-J	CGATCTACAAGGGCACCACAAGAACGC_CAGTGCAGCCACCTATCACACAATCATG	AB02_37F_DNA_A_1_1	2007312	TruSeq	normalized	2016-05-20		Illumina	MiSeq	none	Lane_MiSeq_37F	40	115.46	4	47	initial_denaturation:95_5;_denaturation:_94_0.5;_annealing:52_0.2;_elongation:_72_1;_40_cycles;_final_elongation:72_2	13.1	3.05	39.95
37F.DNA.27.B	CCCCTCCC	CCCCTCCC	18S_rRNA	37F	37F	DNA	27	B	No	MIMARKS-survey	DSMP	gene|marine_metagenome|uncultured_microorganism|uncultured_organism|ecotype|biological_replicate|technical_replicate|interspecies_interaction_between_organisms	0	marine_abyssal_zone_biome	marine_oligotrophic_desert	mud	sediment	aerobe	https://www.qiagen.com/us/cmp/ecom/powersoilkits?COECM_MOBIO_Branded_1707_SEA_PowerSoil__&kwid=%2Bpower%20%2Bsoil%20%2Brna	https://github.com/FranckLejzerowicz/protocols	TruSeq_Nano_PCR_free_Library_Preparation_Kit_single-end	uchime_4.2	TRUE	15.7	F1-F	15-J	CGATCTACAAGGGCACCACAAGAACGC	CAGTGCAGCCACCTATCACACAATCATG	FWD:_{AAGGGCACCACAAGAACGC}_REV:_{CCACCTATCACACAATCATG}	F1-F_15-J	CGATCTACAAGGGCACCACAAGAACGC_CAGTGCAGCCACCTATCACACAATCATG	AB02_37F_DNA_B_1_1	1757175	TruSeq	normalized	2016-05-20		Illumina	MiSeq	none	Lane_MiSeq_37F	40	88.73	4	47	initial_denaturation:95_5;_denaturation:_94_0.5;_annealing:52_0.2;_elongation:_72_1;_40_cycles;_final_elongation:72_2	14.4	2.78	40.03
37F.DNA.28.A	CCCCTCCG	CCCCTCCG	18S_rRNA	37F	37F	DNA	28	A	No	MIMARKS-survey	DSMP	gene|marine_metagenome|uncultured_microorganism|uncultured_organism|ecotype|biological_replicate|technical_replicate|interspecies_interaction_between_organisms	0	marine_abyssal_zone_biome	marine_oligotrophic_desert	mud	sediment	aerobe	https://www.qiagen.com/us/cmp/ecom/powersoilkits?COECM_MOBIO_Branded_1707_SEA_PowerSoil__&kwid=%2Bpower%20%2Bsoil%20%2Brna	https://github.com/FranckLejzerowicz/protocols	TruSeq_Nano_PCR_free_Library_Preparation_Kit_single-end	uchime_4.2	TRUE	14.9	F1-F	15-Q	CGATCTACAAGGGCACCACAAGAACGC	CTGCACGCCCACCTATCACACAATCATG	FWD:_{AAGGGCACCACAAGAACGC}_REV:_{CCACCTATCACACAATCATG}	F1-F_15-Q	CGATCTACAAGGGCACCACAAGAACGC_CTGCACGCCCACCTATCACACAATCATG	AB02_37F_DNA_A_1_1	2007312	TruSeq	normalized	2016-05-20		Illumina	MiSeq	none	Lane_MiSeq_37F	40	115.46	4	47	initial_denaturation:95_5;_denaturation:_94_0.5;_annealing:52_0.2;_elongation:_72_1;_40_cycles;_final_elongation:72_2	11.9	3.36	39.98
37F.DNA.28.B	CCCCTCCT	CCCCTCCT	18S_rRNA	37F	37F	DNA	28	B	No	MIMARKS-survey	DSMP	gene|marine_metagenome|uncultured_microorganism|uncultured_organism|ecotype|biological_replicate|technical_replicate|interspecies_interaction_between_organisms	0	marine_abyssal_zone_biome	marine_oligotrophic_desert	mud	sediment	aerobe	https://www.qiagen.com/us/cmp/ecom/powersoilkits?COECM_MOBIO_Branded_1707_SEA_PowerSoil__&kwid=%2Bpower%20%2Bsoil%20%2Brna	https://github.com/FranckLejzerowicz/protocols	TruSeq_Nano_PCR_free_Library_Preparation_Kit_single-end	uchime_4.2	TRUE	14.9	F1-F	15-Q	CGATCTACAAGGGCACCACAAGAACGC	CTGCACGCCCACCTATCACACAATCATG	FWD:_{AAGGGCACCACAAGAACGC}_REV:_{CCACCTATCACACAATCATG}	F1-F_15-Q	CGATCTACAAGGGCACCACAAGAACGC_CTGCACGCCCACCTATCACACAATCATG	AB02_37F_DNA_B_1_1	1757175	TruSeq	normalized	2016-05-20		Illumina	MiSeq	none	Lane_MiSeq_37F	40	88.73	4	47	initial_denaturation:95_5;_denaturation:_94_0.5;_annealing:52_0.2;_elongation:_72_1;_40_cycles;_final_elongation:72_2	11.1	3.6	39.96
37F.DNA.29.A	CCCCTCGC	CCCCTCGC	18S_rRNA	37F	37F	DNA	29	A	No	MIMARKS-survey	DSMP	gene|marine_metagenome|uncultured_microorganism|uncultured_organism|ecotype|biological_replicate|technical_replicate|interspecies_interaction_between_organisms	0	marine_abyssal_zone_biome	marine_oligotrophic_desert	mud	sediment	aerobe	https://www.qiagen.com/us/cmp/ecom/powersoilkits?COECM_MOBIO_Branded_1707_SEA_PowerSoil__&kwid=%2Bpower%20%2Bsoil%20%2Brna	https://github.com/FranckLejzerowicz/protocols	TruSeq_Nano_PCR_free_Library_Preparation_Kit_single-end	uchime_4.2	TRUE	13.6	F1-F	15-R	CGATCTACAAGGGCACCACAAGAACGC	CTGTATATCCACCTATCACACAATCATG	FWD:_{AAGGGCACCACAAGAACGC}_REV:_{CCACCTATCACACAATCATG}	F1-F_15-R	CGATCTACAAGGGCACCACAAGAACGC_CTGTATATCCACCTATCACACAATCATG	AB02_37F_DNA_A_1_1	2007312	TruSeq	normalized	2016-05-20		Illumina	MiSeq	none	Lane_MiSeq_37F	40	115.46	4	47	initial_denaturation:95_5;_denaturation:_94_0.5;_annealing:52_0.2;_elongation:_72_1;_40_cycles;_final_elongation:72_2	9.65	4.15	40.05
37F.DNA.29.B	CCCCTCGG	CCCCTCGG	18S_rRNA	37F	37F	DNA	29	B	No	MIMARKS-survey	DSMP	gene|marine_metagenome|uncultured_microorganism|uncultured_organism|ecotype|biological_replicate|technical_replicate|interspecies_interaction_between_organisms	0	marine_abyssal_zone_biome	marine_oligotrophic_desert	mud	sediment	aerobe	https://www.qiagen.com/us/cmp/ecom/powersoilkits?COECM_MOBIO_Branded_1707_SEA_PowerSoil__&kwid=%2Bpower%20%2Bsoil%20%2Brna	https://github.com/FranckLejzerowicz/protocols	TruSeq_Nano_PCR_free_Library_Preparation_Kit_single-end	uchime_4.2	TRUE	13.6	F1-F	15-R	CGATCTACAAGGGCACCACAAGAACGC	CTGTATATCCACCTATCACACAATCATG	FWD:_{AAGGGCACCACAAGAACGC}_REV:_{CCACCTATCACACAATCATG}	F1-F_15-R	CGATCTACAAGGGCACCACAAGAACGC_CTGTATATCCACCTATCACACAATCATG	AB02_37F_DNA_B_1_1	1757175	TruSeq	normalized	2016-05-20		Illumina	MiSeq	none	Lane_MiSeq_37F	40	88.73	4	47	initial_denaturation:95_5;_denaturation:_94_0.5;_annealing:52_0.2;_elongation:_72_1;_40_cycles;_final_elongation:72_2	9.52	4.2	39.98
37F.DNA.30.A	CCCCTCGT	CCCCTCGT	18S_rRNA	37F	37F	DNA	30	A	No	MIMARKS-survey	DSMP	gene|marine_metagenome|uncultured_microorganism|uncultured_organism|ecotype|biological_replicate|technical_replicate|interspecies_interaction_between_organisms	0	marine_abyssal_zone_biome	marine_oligotrophic_desert	mud	sediment	aerobe	https://www.qiagen.com/us/cmp/ecom/powersoilkits?COECM_MOBIO_Branded_1707_SEA_PowerSoil__&kwid=%2Bpower%20%2Bsoil%20%2Brna	https://github.com/FranckLejzerowicz/protocols	TruSeq_Nano_PCR_free_Library_Preparation_Kit_single-end	uchime_4.2	TRUE	14.4	F1-F	15-V	CGATCTACAAGGGCACCACAAGAACGC	TATGACATCCACCTATCACACAATCATG	FWD:_{AAGGGCACCACAAGAACGC}_REV:_{CCACCTATCACACAATCATG}	F1-F_15-V	CGATCTACAAGGGCACCACAAGAACGC_TATGACATCCACCTATCACACAATCATG	AB02_37F_DNA_A_1_1	2007312	TruSeq	normalized	2016-05-20		Illumina	MiSeq	none	Lane_MiSeq_37F	40	115.46	4	47	initial_denaturation:95_5;_denaturation:_94_0.5;_annealing:52_0.2;_elongation:_72_1;_40_cycles;_final_elongation:72_2	7.9	5.06	39.97
37F.DNA.30.B	CCCCTCTC	CCCCTCTC	18S_rRNA	37F	37F	DNA	30	B	No	MIMARKS-survey	DSMP	gene|marine_metagenome|uncultured_microorganism|uncultured_organism|ecotype|biological_replicate|technical_replicate|interspecies_interaction_between_organisms	0	marine_abyssal_zone_biome	marine_oligotrophic_desert	mud	sediment	aerobe	https://www.qiagen.com/us/cmp/ecom/powersoilkits?COECM_MOBIO_Branded_1707_SEA_PowerSoil__&kwid=%2Bpower%20%2Bsoil%20%2Brna	https://github.com/FranckLejzerowicz/protocols	TruSeq_Nano_PCR_free_Library_Preparation_Kit_single-end	uchime_4.2	TRUE	14.4	F1-F	15-V	CGATCTACAAGGGCACCACAAGAACGC	TATGACATCCACCTATCACACAATCATG	FWD:_{AAGGGCACCACAAGAACGC}_REV:_{CCACCTATCACACAATCATG}	F1-F_15-V	CGATCTACAAGGGCACCACAAGAACGC_TATGACATCCACCTATCACACAATCATG	AB02_37F_DNA_B_1_1	1757175	TruSeq	normalized	2016-05-20		Illumina	MiSeq	none	Lane_MiSeq_37F	40	88.73	4	47	initial_denaturation:95_5;_denaturation:_94_0.5;_annealing:52_0.2;_elongation:_72_1;_40_cycles;_final_elongation:72_2	7.8	5.13	40.01
37F.DNA.31.A	CCCCTCTG	CCCCTCTG	18S_rRNA	37F	37F	DNA	31	A	No	MIMARKS-survey	DSMP	gene|marine_metagenome|uncultured_microorganism|uncultured_organism|ecotype|biological_replicate|technical_replicate|interspecies_interaction_between_organisms	0	marine_abyssal_zone_biome	marine_oligotrophic_desert	mud	sediment	aerobe	https://www.qiagen.com/us/cmp/ecom/powersoilkits?COECM_MOBIO_Branded_1707_SEA_PowerSoil__&kwid=%2Bpower%20%2Bsoil%20%2Brna	https://github.com/FranckLejzerowicz/protocols	TruSeq_Nano_PCR_free_Library_Preparation_Kit_single-end	uchime_4.2	TRUE	36.3	F1-B	15-F	CACATGATAAGGGCACCACAAGAACGC	ATATCTACCCACCTATCACACAATCATG	FWD:_{AAGGGCACCACAAGAACGC}_REV:_{CCACCTATCACACAATCATG}	F1-B_15-F	CACATGATAAGGGCACCACAAGAACGC_ATATCTACCCACCTATCACACAATCATG	DSMP_37F_DNA_A_1_1	15294031	TruSeq	normalized	2017-07-04	TruSeq1	Illumina	HiSeq_2500	none	lane_pool37F	30	22.46	4	42	initial_denaturation:95_5;_denaturation:_94_0.5;_annealing:52_0.2;_elongation:_72_1;_40_cycles;_final_elongation:72_2	0.84	50	42
37F.DNA.31.B	CCCCTCTT	CCCCTCTT	18S_rRNA	37F	37F	DNA	31	B	No	MIMARKS-survey	DSMP	gene|marine_metagenome|uncultured_microorganism|uncultured_organism|ecotype|biological_replicate|technical_replicate|interspecies_interaction_between_organisms	0	marine_abyssal_zone_biome	marine_oligotrophic_desert	mud	sediment	aerobe	https://www.qiagen.com/us/cmp/ecom/powersoilkits?COECM_MOBIO_Branded_1707_SEA_PowerSoil__&kwid=%2Bpower%20%2Bsoil%20%2Brna	https://github.com/FranckLejzerowicz/protocols	TruSeq_Nano_PCR_free_Library_Preparation_Kit_single-end	uchime_4.2	TRUE	36.3	F1-B	15-F	CACATGATAAGGGCACCACAAGAACGC	ATATCTACCCACCTATCACACAATCATG	FWD:_{AAGGGCACCACAAGAACGC}_REV:_{CCACCTATCACACAATCATG}	F1-B_15-F	CACATGATAAGGGCACCACAAGAACGC_ATATCTACCCACCTATCACACAATCATG	DSMP_37F_DNA_B_1_1	2278945	TruSeq	normalized	2017-07-04	TruSeq8	Illumina	HiSeq_2500	none	lane_pool37F	40	337.28	4	42	initial_denaturation:95_5;_denaturation:_94_0.5;_annealing:52_0.2;_elongation:_72_1;_40_cycles;_final_elongation:72_2	0.92	50	46
37F.DNA.32.A	CCCCTGCC	CCCCTGCC	18S_rRNA	37F	37F	DNA	32	A	No	MIMARKS-survey	DSMP	gene|marine_metagenome|uncultured_microorganism|uncultured_organism|ecotype|biological_replicate|technical_replicate|interspecies_interaction_between_organisms	0	marine_abyssal_zone_biome	marine_oligotrophic_desert	mud	sediment	aerobe	https://www.qiagen.com/us/cmp/ecom/powersoilkits?COECM_MOBIO_Branded_1707_SEA_PowerSoil__&kwid=%2Bpower%20%2Bsoil%20%2Brna	https://github.com/FranckLejzerowicz/protocols	TruSeq_Nano_PCR_free_Library_Preparation_Kit_single-end	uchime_4.2	TRUE	39.3	F1-B	15-H	CACATGATAAGGGCACCACAAGAACGC	ATGTCAGTCCACCTATCACACAATCATG	FWD:_{AAGGGCACCACAAGAACGC}_REV:_{CCACCTATCACACAATCATG}	F1-B_15-H	CACATGATAAGGGCACCACAAGAACGC_ATGTCAGTCCACCTATCACACAATCATG	DSMP_37F_DNA_A_1_1	15294031	TruSeq	normalized	2017-07-04	TruSeq1	Illumina	HiSeq_2500	none	lane_pool37F	30	22.46	4	42	initial_denaturation:95_5;_denaturation:_94_0.5;_annealing:52_0.2;_elongation:_72_1;_40_cycles;_final_elongation:72_2	2.2	13.64	30.01
37F.DNA.32.B	CCCCTGCG	CCCCTGCG	18S_rRNA	37F	37F	DNA	32	B	No	MIMARKS-survey	DSMP	gene|marine_metagenome|uncultured_microorganism|uncultured_organism|ecotype|biological_replicate|technical_replicate|interspecies_interaction_between_organisms	0	marine_abyssal_zone_biome	marine_oligotrophic_desert	mud	sediment	aerobe	https://www.qiagen.com/us/cmp/ecom/powersoilkits?COECM_MOBIO_Branded_1707_SEA_PowerSoil__&kwid=%2Bpower%20%2Bsoil%20%2Brna	https://github.com/FranckLejzerowicz/protocols	TruSeq_Nano_PCR_free_Library_Preparation_Kit_single-end	uchime_4.2	TRUE	39.3	F1-B	15-H	CACATGATAAGGGCACCACAAGAACGC	ATGTCAGTCCACCTATCACACAATCATG	FWD:_{AAGGGCACCACAAGAACGC}_REV:_{CCACCTATCACACAATCATG}	F1-B_15-H	CACATGATAAGGGCACCACAAGAACGC_ATGTCAGTCCACCTATCACACAATCATG	DSMP_37F_DNA_B_1_1	2278945	TruSeq	normalized	2017-07-04	TruSeq8	Illumina	HiSeq_2500	none	lane_pool37F	40	337.28	4	42	initial_denaturation:95_5;_denaturation:_94_0.5;_annealing:52_0.2;_elongation:_72_1;_40_cycles;_final_elongation:72_2	2.2	18.18	40
37F.DNA.33.A	CCCCTGCT	CCCCTGCT	18S_rRNA	37F	37F	DNA	33	A	No	MIMARKS-survey	DSMP	gene|marine_metagenome|uncultured_microorganism|uncultured_organism|ecotype|biological_replicate|technical_replicate|interspecies_interaction_between_organisms	0	marine_abyssal_zone_biome	marine_oligotrophic_desert	mud	sediment	aerobe	https://www.qiagen.com/us/cmp/ecom/powersoilkits?COECM_MOBIO_Branded_1707_SEA_PowerSoil__&kwid=%2Bpower%20%2Bsoil%20%2Brna	https://github.com/FranckLejzerowicz/protocols	TruSeq_Nano_PCR_free_Library_Preparation_Kit_single-end	uchime_4.2	TRUE	60	F1-B	15-M	CACATGATAAGGGCACCACAAGAACGC	CGACGAGCCCACCTATCACACAATCATG	FWD:_{AAGGGCACCACAAGAACGC}_REV:_{CCACCTATCACACAATCATG}	F1-B_15-M	CACATGATAAGGGCACCACAAGAACGC_CGACGAGCCCACCTATCACACAATCATG	DSMP_37F_DNA_A_1_2	15316119	TruSeq	normalized	2017-07-04	TruSeq4	Illumina	HiSeq_2500	none	lane_pool37F	27	20.04	4	42	initial_denaturation:95_5;_denaturation:_94_0.5;_annealing:52_0.2;_elongation:_72_1;_40_cycles;_final_elongation:72_2	5.5	4.91	27.01
37F.DNA.33.B	CCCCTGGC	CCCCTGGC	18S_rRNA	37F	37F	DNA	33	B	No	MIMARKS-survey	DSMP	gene|marine_metagenome|uncultured_microorganism|uncultured_organism|ecotype|biological_replicate|technical_replicate|interspecies_interaction_between_organisms	0	marine_abyssal_zone_biome	marine_oligotrophic_desert	mud	sediment	aerobe	https://www.qiagen.com/us/cmp/ecom/powersoilkits?COECM_MOBIO_Branded_1707_SEA_PowerSoil__&kwid=%2Bpower%20%2Bsoil%20%2Brna	https://github.com/FranckLejzerowicz/protocols	TruSeq_Nano_PCR_free_Library_Preparation_Kit_single-end	uchime_4.2	TRUE	60	F1-B	15-M	CACATGATAAGGGCACCACAAGAACGC	CGACGAGCCCACCTATCACACAATCATG	FWD:_{AAGGGCACCACAAGAACGC}_REV:_{CCACCTATCACACAATCATG}	F1-B_15-M	CACATGATAAGGGCACCACAAGAACGC_CGACGAGCCCACCTATCACACAATCATG	DSMP_37F_DNA_B_1_1	2278945	TruSeq	normalized	2017-07-04	TruSeq8	Illumina	HiSeq_2500	none	lane_pool37F	40	337.28	4	42	initial_denaturation:95_5;_denaturation:_94_0.5;_annealing:52_0.2;_elongation:_72_1;_40_cycles;_final_elongation:72_2	1.92	20.83	39.99
37F.DNA.34.A	CCCCTGGG	CCCCTGGG	18S_rRNA	37F	37F	DNA	34	A	No	MIMARKS-survey	DSMP	gene|marine_metagenome|uncultured_microorganism|uncultured_organism|ecotype|biological_replicate|technical_replicate|interspecies_interaction_between_organisms	0	marine_abyssal_zone_biome	marine_oligotrophic_desert	mud	sediment	aerobe	https://www.qiagen.com/us/cmp/ecom/powersoilkits?COECM_MOBIO_Branded_1707_SEA_PowerSoil__&kwid=%2Bpower%20%2Bsoil%20%2Brna	https://github.com/FranckLejzerowicz/protocols	TruSeq_Nano_PCR_free_Library_Preparation_Kit_single-end	uchime_4.2	TRUE	46.1	F1-B	15-O	CACATGATAAGGGCACCACAAGAACGC	CGAGCTAGCCACCTATCACACAATCATG	FWD:_{AAGGGCACCACAAGAACGC}_REV:_{CCACCTATCACACAATCATG}	F1-B_15-O	CACATGATAAGGGCACCACAAGAACGC_CGAGCTAGCCACCTATCACACAATCATG	DSMP_37F_DNA_A_1_3	18703377	TruSeq	normalized	2017-07-04	TruSeq5	Illumina	HiSeq_2500	none	lane_pool37F	27.5	17.75	4	41	initial_denaturation:95_5;_denaturation:_94_0.5;_annealing:52_0.2;_elongation:_72_1;_40_cycles;_final_elongation:72_2	1.96	14.03	27.5
37F.DNA.34.B	CCCCTGGT	CCCCTGGT	18S_rRNA	37F	37F	DNA	34	B	No	MIMARKS-survey	DSMP	gene|marine_metagenome|uncultured_microorganism|uncultured_organism|ecotype|biological_replicate|technical_replicate|interspecies_interaction_between_organisms	0	marine_abyssal_zone_biome	marine_oligotrophic_desert	mud	sediment	aerobe	https://www.qiagen.com/us/cmp/ecom/powersoilkits?COECM_MOBIO_Branded_1707_SEA_PowerSoil__&kwid=%2Bpower%20%2Bsoil%20%2Brna	https://github.com/FranckLejzerowicz/protocols	TruSeq_Nano_PCR_free_Library_Preparation_Kit_single-end	uchime_4.2	TRUE	46.1	F1-B	15-O	CACATGATAAGGGCACCACAAGAACGC	CGAGCTAGCCACCTATCACACAATCATG	FWD:_{AAGGGCACCACAAGAACGC}_REV:_{CCACCTATCACACAATCATG}	F1-B_15-O	CACATGATAAGGGCACCACAAGAACGC_CGAGCTAGCCACCTATCACACAATCATG	DSMP_37F_DNA_B_1_3	1877212	TruSeq	normalized	2017-07-04	TruSeq10	Illumina	HiSeq_2500	none	lane_pool37F	40	535.96	4	41	initial_denaturation:95_5;_denaturation:_94_0.5;_annealing:52_0.2;_elongation:_72_1;_40_cycles;_final_elongation:72_2	1.1	50	55
37F.DNA.35.A	CCCCTGTC	CCCCTGTC	18S_rRNA	37F	37F	DNA	35	A	No	MIMARKS-survey	DSMP	gene|marine_metagenome|uncultured_microorganism|uncultured_organism|ecotype|biological_replicate|technical_replicate|interspecies_interaction_between_organisms	0	marine_abyssal_zone_biome	marine_oligotrophic_desert	mud	sediment	aerobe	https://www.qiagen.com/us/cmp/ecom/powersoilkits?COECM_MOBIO_Branded_1707_SEA_PowerSoil__&kwid=%2Bpower%20%2Bsoil%20%2Brna	https://github.com/FranckLejzerowicz/protocols	TruSeq_Nano_PCR_free_Library_Preparation_Kit_single-end	uchime_4.2	TRUE	45.1	F1-B	15-U	CACATGATAAGGGCACCACAAGAACGC	TATCGCTGCCACCTATCACACAATCATG	FWD:_{AAGGGCACCACAAGAACGC}_REV:_{CCACCTATCACACAATCATG}	F1-B_15-U	CACATGATAAGGGCACCACAAGAACGC_TATCGCTGCCACCTATCACACAATCATG	DSMP_37F_DNA_A_1_3	18703377	TruSeq	normalized	2017-07-04	TruSeq5	Illumina	HiSeq_2500	none	lane_pool37F	27.5	17.75	4	41	initial_denaturation:95_5;_denaturation:_94_0.5;_annealing:52_0.2;_elongation:_72_1;_40_cycles;_final_elongation:72_2	1.3	21.15	27.49
37F.DNA.35.B	CCCCTGTG	CCCCTGTG	18S_rRNA	37F	37F	DNA	35	B	No	MIMARKS-survey	DSMP	gene|marine_metagenome|uncultured_microorganism|uncultured_organism|ecotype|biological_replicate|technical_replicate|interspecies_interaction_between_organisms	0	marine_abyssal_zone_biome	marine_oligotrophic_desert	mud	sediment	aerobe	https://www.qiagen.com/us/cmp/ecom/powersoilkits?COECM_MOBIO_Branded_1707_SEA_PowerSoil__&kwid=%2Bpower%20%2Bsoil%20%2Brna	https://github.com/FranckLejzerowicz/protocols	TruSeq_Nano_PCR_free_Library_Preparation_Kit_single-end	uchime_4.2	TRUE	45.1	F1-B	15-U	CACATGATAAGGGCACCACAAGAACGC	TATCGCTGCCACCTATCACACAATCATG	FWD:_{AAGGGCACCACAAGAACGC}_REV:_{CCACCTATCACACAATCATG}	F1-B_15-U	CACATGATAAGGGCACCACAAGAACGC_TATCGCTGCCACCTATCACACAATCATG	DSMP_37F_DNA_B_1_3	1877212	TruSeq	normalized	2017-07-04	TruSeq10	Illumina	HiSeq_2500	none	lane_pool37F	40	535.96	4	41	initial_denaturation:95_5;_denaturation:_94_0.5;_annealing:52_0.2;_elongation:_72_1;_40_cycles;_final_elongation:72_2	1.08	50	54
37F.DNA.36.A	CCCCTGTT	CCCCTGTT	18S_rRNA	37F	37F	DNA	36	A	No	MIMARKS-survey	DSMP	gene|marine_metagenome|uncultured_microorganism|uncultured_organism|ecotype|biological_replicate|technical_replicate|interspecies_interaction_between_organisms	0	marine_abyssal_zone_biome	marine_oligotrophic_desert	mud	sediment	aerobe	https://www.qiagen.com/us/cmp/ecom/powersoilkits?COECM_MOBIO_Branded_1707_SEA_PowerSoil__&kwid=%2Bpower%20%2Bsoil%20%2Brna	https://github.com/FranckLejzerowicz/protocols	TruSeq_Nano_PCR_free_Library_Preparation_Kit_single-end	uchime_4.2	TRUE	42	F1-B	15-W	CACATGATAAGGGCACCACAAGAACGC	TGATATGCCCACCTATCACACAATCATG	FWD:_{AAGGGCACCACAAGAACGC}_REV:_{CCACCTATCACACAATCATG}	F1-B_15-W	CACATGATAAGGGCACCACAAGAACGC_TGATATGCCCACCTATCACACAATCATG	DSMP_37F_DNA_A_1_3	18703377	TruSeq	normalized	2017-07-04	TruSeq5	Illumina	HiSeq_2500	none	lane_pool37F	27.5	17.75	4	41	initial_denaturation:95_5;_denaturation:_94_0.5;_annealing:52_0.2;_elongation:_72_1;_40_cycles;_final_elongation:72_2	0.88	50	44
37F.DNA.36.B	CCCCTTCC	CCCCTTCC	18S_rRNA	37F	37F	DNA	36	B	No	MIMARKS-survey	DSMP	gene|marine_metagenome|uncultured_microorganism|uncultured_organism|ecotype|biological_replicate|technical_replicate|interspecies_interaction_between_organisms	0	marine_abyssal_zone_biome	marine_oligotrophic_desert	mud	sediment	aerobe	https://www.qiagen.com/us/cmp/ecom/powersoilkits?COECM_MOBIO_Branded_1707_SEA_PowerSoil__&kwid=%2Bpower%20%2Bsoil%20%2Brna	https://github.com/FranckLejzerowicz/protocols	TruSeq_Nano_PCR_free_Library_Preparation_Kit_single-end	uchime_4.2	TRUE	42	F1-B	15-W	CACATGATAAGGGCACCACAAGAACGC	TGATATGCCCACCTATCACACAATCATG	FWD:_{AAGGGCACCACAAGAACGC}_REV:_{CCACCTATCACACAATCATG}	F1-B_15-W	CACATGATAAGGGCACCACAAGAACGC_TGATATGCCCACCTATCACACAATCATG	DSMP_37F_DNA_B_1_2	2198874	TruSeq	normalized	2017-07-04	TruSeq9	Illumina	HiSeq_2500	none	lane_pool37F	40	307.78	4	42	initial_denaturation:95_5;_denaturation:_94_0.5;_annealing:52_0.2;_elongation:_72_1;_40_cycles;_final_elongation:72_2	1.04	50	52
37F.DNA.38.A	CCCCTTGC	CCCCTTGC	18S_rRNA	37F	37F	DNA	38	A	No	MIMARKS-survey	DSMP	gene|marine_metagenome|uncultured_microorganism|uncultured_organism|ecotype|biological_replicate|technical_replicate|interspecies_interaction_between_organisms	0	marine_abyssal_zone_biome	marine_oligotrophic_desert	mud	sediment	aerobe	https://www.qiagen.com/us/cmp/ecom/powersoilkits?COECM_MOBIO_Branded_1707_SEA_PowerSoil__&kwid=%2Bpower%20%2Bsoil%20%2Brna	https://github.com/FranckLejzerowicz/protocols	TruSeq_Nano_PCR_free_Library_Preparation_Kit_single-end	uchime_4.2	TRUE	17	F1-G	15-F	CGATGACAAAGGGCACCACAAGAACGC	ATATCTACCCACCTATCACACAATCATG	FWD:_{AAGGGCACCACAAGAACGC}_REV:_{CCACCTATCACACAATCATG}	F1-G_15-F	CGATGACAAAGGGCACCACAAGAACGC_ATATCTACCCACCTATCACACAATCATG	AB02_37F_DNA_A_1_1	2007312	TruSeq	normalized	2016-05-20		Illumina	MiSeq	none	Lane_MiSeq_37F	40	115.46	4	47	initial_denaturation:95_5;_denaturation:_94_0.5;_annealing:52_0.2;_elongation:_72_1;_40_cycles;_final_elongation:72_2	12.7	3.15	40
37F.DNA.38.B	CCCCTTGG	CCCCTTGG	18S_rRNA	37F	37F	DNA	38	B	No	MIMARKS-survey	DSMP	gene|marine_metagenome|uncultured_microorganism|uncultured_organism|ecotype|biological_replicate|technical_replicate|interspecies_interaction_between_organisms	0	marine_abyssal_zone_biome	marine_oligotrophic_desert	mud	sediment	aerobe	https://www.qiagen.com/us/cmp/ecom/powersoilkits?COECM_MOBIO_Branded_1707_SEA_PowerSoil__&kwid=%2Bpower%20%2Bsoil%20%2Brna	https://github.com/FranckLejzerowicz/protocols	TruSeq_Nano_PCR_free_Library_Preparation_Kit_single-end	uchime_4.2	TRUE	17	F1-G	15-F	CGATGACAAAGGGCACCACAAGAACGC	ATATCTACCCACCTATCACACAATCATG	FWD:_{AAGGGCACCACAAGAACGC}_REV:_{CCACCTATCACACAATCATG}	F1-G_15-F	CGATGACAAAGGGCACCACAAGAACGC_ATATCTACCCACCTATCACACAATCATG	AB02_37F_DNA_B_1_1	1757175	TruSeq	normalized	2016-05-20		Illumina	MiSeq	none	Lane_MiSeq_37F	40	88.73	4	47	initial_denaturation:95_5;_denaturation:_94_0.5;_annealing:52_0.2;_elongation:_72_1;_40_cycles;_final_elongation:72_2	12.7	3.15	40
37F.DNA.39.A	CCCCTTGT	CCCCTTGT	18S_rRNA	37F	37F	DNA	39	A	No	MIMARKS-survey	DSMP	gene|marine_metagenome|uncultured_microorganism|uncultured_organism|ecotype|biological_replicate|technical_replicate|interspecies_interaction_between_organisms	0	marine_abyssal_zone_biome	marine_oligotrophic_desert	mud	sediment	aerobe	https://www.qiagen.com/us/cmp/ecom/powersoilkits?COECM_MOBIO_Branded_1707_SEA_PowerSoil__&kwid=%2Bpower%20%2Bsoil%20%2Brna	https://github.com/FranckLejzerowicz/protocols	TruSeq_Nano_PCR_free_Library_Preparation_Kit_single-end	uchime_4.2	TRUE	7	F1-G	15-K	CGATGACAAAGGGCACCACAAGAACGC	CATCGTACCCACCTATCACACAATCATG	FWD:_{AAGGGCACCACAAGAACGC}_REV:_{CCACCTATCACACAATCATG}	F1-G_15-K	CGATGACAAAGGGCACCACAAGAACGC_CATCGTACCCACCTATCACACAATCATG	AB02_37F_DNA_A_1_1	2007312	TruSeq	normalized	2016-05-20		Illumina	MiSeq	none	Lane_MiSeq_37F	40	115.46	4	47	initial_denaturation:95_5;_denaturation:_94_0.5;_annealing:52_0.2;_elongation:_72_1;_40_cycles;_final_elongation:72_2	15.9	2.52	40.07
37F.DNA.39.B	CCCCTTTC	CCCCTTTC	18S_rRNA	37F	37F	DNA	39	B	No	MIMARKS-survey	DSMP	gene|marine_metagenome|uncultured_microorganism|uncultured_organism|ecotype|biological_replicate|technical_replicate|interspecies_interaction_between_organisms	0	marine_abyssal_zone_biome	marine_oligotrophic_desert	mud	sediment	aerobe	https://www.qiagen.com/us/cmp/ecom/powersoilkits?COECM_MOBIO_Branded_1707_SEA_PowerSoil__&kwid=%2Bpower%20%2Bsoil%20%2Brna	https://github.com/FranckLejzerowicz/protocols	TruSeq_Nano_PCR_free_Library_Preparation_Kit_single-end	uchime_4.2	TRUE	7	F1-G	15-K	CGATGACAAAGGGCACCACAAGAACGC	CATCGTACCCACCTATCACACAATCATG	FWD:_{AAGGGCACCACAAGAACGC}_REV:_{CCACCTATCACACAATCATG}	F1-G_15-K	CGATGACAAAGGGCACCACAAGAACGC_CATCGTACCCACCTATCACACAATCATG	AB02_37F_DNA_B_1_1	1757175	TruSeq	normalized	2016-05-20		Illumina	MiSeq	none	Lane_MiSeq_37F	40	88.73	4	47	initial_denaturation:95_5;_denaturation:_94_0.5;_annealing:52_0.2;_elongation:_72_1;_40_cycles;_final_elongation:72_2	15.9	2.52	40.07
37F.DNA.40.A	CCCCTTTG	CCCCTTTG	18S_rRNA	37F	37F	DNA	40	A	No	MIMARKS-survey	DSMP	gene|marine_metagenome|uncultured_microorganism|uncultured_organism|ecotype|biological_replicate|technical_replicate|interspecies_interaction_between_organisms	0	marine_abyssal_zone_biome	marine_oligotrophic_desert	mud	sediment	aerobe	https://www.qiagen.com/us/cmp/ecom/powersoilkits?COECM_MOBIO_Branded_1707_SEA_PowerSoil__&kwid=%2Bpower%20%2Bsoil%20%2Brna	https://github.com/FranckLejzerowicz/protocols	TruSeq_Nano_PCR_free_Library_Preparation_Kit_single-end	uchime_4.2	TRUE	9.7	F1-G	15-O	CGATGACAAAGGGCACCACAAGAACGC	CGAGCTAGCCACCTATCACACAATCATG	FWD:_{AAGGGCACCACAAGAACGC}_REV:_{CCACCTATCACACAATCATG}	F1-G_15-O	CGATGACAAAGGGCACCACAAGAACGC_CGAGCTAGCCACCTATCACACAATCATG	AB02_37F_DNA_A_1_1	2007312	TruSeq	normalized	2016-05-20		Illumina	MiSeq	none	Lane_MiSeq_37F	40	115.46	4	47	initial_denaturation:95_5;_denaturation:_94_0.5;_annealing:52_0.2;_elongation:_72_1;_40_cycles;_final_elongation:72_2	15.7	2.55	40.03
37F.DNA.40.B	CCCCTTTT	CCCCTTTT	18S_rRNA	37F	37F	DNA	40	B	No	MIMARKS-survey	DSMP	gene|marine_metagenome|uncultured_microorganism|uncultured_organism|ecotype|biological_replicate|technical_replicate|interspecies_interaction_between_organisms	0	marine_abyssal_zone_biome	marine_oligotrophic_desert	mud	sediment	aerobe	https://www.qiagen.com/us/cmp/ecom/powersoilkits?COECM_MOBIO_Branded_1707_SEA_PowerSoil__&kwid=%2Bpower%20%2Bsoil%20%2Brna	https://github.com/FranckLejzerowicz/protocols	TruSeq_Nano_PCR_free_Library_Preparation_Kit_single-end	uchime_4.2	TRUE	9.7	F1-G	15-O	CGATGACAAAGGGCACCACAAGAACGC	CGAGCTAGCCACCTATCACACAATCATG	FWD:_{AAGGGCACCACAAGAACGC}_REV:_{CCACCTATCACACAATCATG}	F1-G_15-O	CGATGACAAAGGGCACCACAAGAACGC_CGAGCTAGCCACCTATCACACAATCATG	AB02_37F_DNA_B_1_1	1757175	TruSeq	normalized	2016-05-20		Illumina	MiSeq	none	Lane_MiSeq_37F	40	88.73	4	47	initial_denaturation:95_5;_denaturation:_94_0.5;_annealing:52_0.2;_elongation:_72_1;_40_cycles;_final_elongation:72_2	15.7	2.55	40.03
37F.DNA.41.A	CCCGCCCC	CCCGCCCC	18S_rRNA	37F	37F	DNA	41	A	No	MIMARKS-survey	DSMP	gene|marine_metagenome|uncultured_microorganism|uncultured_organism|ecotype|biological_replicate|technical_replicate|interspecies_interaction_between_organisms	0	marine_abyssal_zone_biome	marine_oligotrophic_desert	mud	sediment	aerobe	https://www.qiagen.com/us/cmp/ecom/powersoilkits?COECM_MOBIO_Branded_1707_SEA_PowerSoil__&kwid=%2Bpower%20%2Bsoil%20%2Brna	https://github.com/FranckLejzerowicz/protocols	TruSeq_Nano_PCR_free_Library_Preparation_Kit_single-end	uchime_4.2	TRUE	15.1	F1-H	15-N	CGCACGTCAAGGGCACCACAAGAACGC	CGAGACGTCCACCTATCACACAATCATG	FWD:_{AAGGGCACCACAAGAACGC}_REV:_{CCACCTATCACACAATCATG}	F1-H_15-N	CGCACGTCAAGGGCACCACAAGAACGC_CGAGACGTCCACCTATCACACAATCATG	AB02_37F_DNA_A_1_1	2007312	TruSeq	normalized	2016-05-20		Illumina	MiSeq	none	Lane_MiSeq_37F	40	115.46	4	47	initial_denaturation:95_5;_denaturation:_94_0.5;_annealing:52_0.2;_elongation:_72_1;_40_cycles;_final_elongation:72_2	13.1	3.05	39.95
37F.DNA.41.B	CCCGCCCG	CCCGCCCG	18S_rRNA	37F	37F	DNA	41	B	No	MIMARKS-survey	DSMP	gene|marine_metagenome|uncultured_microorganism|uncultured_organism|ecotype|biological_replicate|technical_replicate|interspecies_interaction_between_organisms	0	marine_abyssal_zone_biome	marine_oligotrophic_desert	mud	sediment	aerobe	https://www.qiagen.com/us/cmp/ecom/powersoilkits?COECM_MOBIO_Branded_1707_SEA_PowerSoil__&kwid=%2Bpower%20%2Bsoil%20%2Brna	https://github.com/FranckLejzerowicz/protocols	TruSeq_Nano_PCR_free_Library_Preparation_Kit_single-end	uchime_4.2	TRUE	15.1	F1-H	15-N	CGCACGTCAAGGGCACCACAAGAACGC	CGAGACGTCCACCTATCACACAATCATG	FWD:_{AAGGGCACCACAAGAACGC}_REV:_{CCACCTATCACACAATCATG}	F1-H_15-N	CGCACGTCAAGGGCACCACAAGAACGC_CGAGACGTCCACCTATCACACAATCATG	AB02_37F_DNA_B_1_1	1757175	TruSeq	normalized	2016-05-20		Illumina	MiSeq	none	Lane_MiSeq_37F	40	88.73	4	47	initial_denaturation:95_5;_denaturation:_94_0.5;_annealing:52_0.2;_elongation:_72_1;_40_cycles;_final_elongation:72_2	13.1	3.05	39.95
37F.DNA.43.A	CCCGCCCT	CCCGCCCT	18S_rRNA	37F	37F	DNA	43	A	No	MIMARKS-survey	DSMP	gene|marine_metagenome|uncultured_microorganism|uncultured_organism|ecotype|biological_replicate|technical_replicate|interspecies_interaction_between_organisms	0	marine_abyssal_zone_biome	marine_oligotrophic_desert	mud	sediment	aerobe	https://www.qiagen.com/us/cmp/ecom/powersoilkits?COECM_MOBIO_Branded_1707_SEA_PowerSoil__&kwid=%2Bpower%20%2Bsoil%20%2Brna	https://github.com/FranckLejzerowicz/protocols	TruSeq_Nano_PCR_free_Library_Preparation_Kit_single-end	uchime_4.2	TRUE	42.1	F1-C	15-B	CACTGATCAAGGGCACCACAAGAACGC	AGATGATGCCACCTATCACACAATCATG	FWD:_{AAGGGCACCACAAGAACGC}_REV:_{CCACCTATCACACAATCATG}	F1-C_15-B	CACTGATCAAGGGCACCACAAGAACGC_AGATGATGCCACCTATCACACAATCATG	DSMP_37F_DNA_A_1_3	18703377	TruSeq	normalized	2017-07-04	TruSeq5	Illumina	HiSeq_2500	none	lane_pool37F	27.5	17.75	4	41	initial_denaturation:95_5;_denaturation:_94_0.5;_annealing:52_0.2;_elongation:_72_1;_40_cycles;_final_elongation:72_2	3.7	7.43	27.49
37F.DNA.43.B	CCCGCCGC	CCCGCCGC	18S_rRNA	37F	37F	DNA	43	B	No	MIMARKS-survey	DSMP	gene|marine_metagenome|uncultured_microorganism|uncultured_organism|ecotype|biological_replicate|technical_replicate|interspecies_interaction_between_organisms	0	marine_abyssal_zone_biome	marine_oligotrophic_desert	mud	sediment	aerobe	https://www.qiagen.com/us/cmp/ecom/powersoilkits?COECM_MOBIO_Branded_1707_SEA_PowerSoil__&kwid=%2Bpower%20%2Bsoil%20%2Brna	https://github.com/FranckLejzerowicz/protocols	TruSeq_Nano_PCR_free_Library_Preparation_Kit_single-end	uchime_4.2	TRUE	42.1	F1-C	15-B	CACTGATCAAGGGCACCACAAGAACGC	AGATGATGCCACCTATCACACAATCATG	FWD:_{AAGGGCACCACAAGAACGC}_REV:_{CCACCTATCACACAATCATG}	F1-C_15-B	CACTGATCAAGGGCACCACAAGAACGC_AGATGATGCCACCTATCACACAATCATG	DSMP_37F_DNA_B_1_2	2198874	TruSeq	normalized	2017-07-04	TruSeq9	Illumina	HiSeq_2500	none	lane_pool37F	40	307.78	4	42	initial_denaturation:95_5;_denaturation:_94_0.5;_annealing:52_0.2;_elongation:_72_1;_40_cycles;_final_elongation:72_2	3.8	10.53	40.01
37F.DNA.44.A	CCCGCCGG	CCCGCCGG	18S_rRNA	37F	37F	DNA	44	A	No	MIMARKS-survey	DSMP	gene|marine_metagenome|uncultured_microorganism|uncultured_organism|ecotype|biological_replicate|technical_replicate|interspecies_interaction_between_organisms	0	marine_abyssal_zone_biome	marine_oligotrophic_desert	mud	sediment	aerobe	https://www.qiagen.com/us/cmp/ecom/powersoilkits?COECM_MOBIO_Branded_1707_SEA_PowerSoil__&kwid=%2Bpower%20%2Bsoil%20%2Brna	https://github.com/FranckLejzerowicz/protocols	TruSeq_Nano_PCR_free_Library_Preparation_Kit_single-end	uchime_4.2	TRUE	45.6	F1-C	15-E	CACTGATCAAGGGCACCACAAGAACGC	ATAGACTGCCACCTATCACACAATCATG	FWD:_{AAGGGCACCACAAGAACGC}_REV:_{CCACCTATCACACAATCATG}	F1-C_15-E	CACTGATCAAGGGCACCACAAGAACGC_ATAGACTGCCACCTATCACACAATCATG	DSMP_37F_DNA_A_1_2	15316119	TruSeq	normalized	2017-07-04	TruSeq4	Illumina	HiSeq_2500	none	lane_pool37F	27	20.04	4	42	initial_denaturation:95_5;_denaturation:_94_0.5;_annealing:52_0.2;_elongation:_72_1;_40_cycles;_final_elongation:72_2	1.36	19.85	27
37F.DNA.44.B	CCCGCCGT	CCCGCCGT	18S_rRNA	37F	37F	DNA	44	B	No	MIMARKS-survey	DSMP	gene|marine_metagenome|uncultured_microorganism|uncultured_organism|ecotype|biological_replicate|technical_replicate|interspecies_interaction_between_organisms	0	marine_abyssal_zone_biome	marine_oligotrophic_desert	mud	sediment	aerobe	https://www.qiagen.com/us/cmp/ecom/powersoilkits?COECM_MOBIO_Branded_1707_SEA_PowerSoil__&kwid=%2Bpower%20%2Bsoil%20%2Brna	https://github.com/FranckLejzerowicz/protocols	TruSeq_Nano_PCR_free_Library_Preparation_Kit_single-end	uchime_4.2	TRUE	45.6	F1-C	15-E	CACTGATCAAGGGCACCACAAGAACGC	ATAGACTGCCACCTATCACACAATCATG	FWD:_{AAGGGCACCACAAGAACGC}_REV:_{CCACCTATCACACAATCATG}	F1-C_15-E	CACTGATCAAGGGCACCACAAGAACGC_ATAGACTGCCACCTATCACACAATCATG	DSMP_37F_DNA_B_1_2	2198874	TruSeq	normalized	2017-07-04	TruSeq9	Illumina	HiSeq_2500	none	lane_pool37F	40	307.78	4	42	initial_denaturation:95_5;_denaturation:_94_0.5;_annealing:52_0.2;_elongation:_72_1;_40_cycles;_final_elongation:72_2	1.2	50	60
37F.DNA.45.A	CCCGCCTC	CCCGCCTC	18S_rRNA	37F	37F	DNA	45	A	No	MIMARKS-survey	DSMP	gene|marine_metagenome|uncultured_microorganism|uncultured_organism|ecotype|biological_replicate|technical_replicate|interspecies_interaction_between_organisms	0	marine_abyssal_zone_biome	marine_oligotrophic_desert	mud	sediment	aerobe	https://www.qiagen.com/us/cmp/ecom/powersoilkits?COECM_MOBIO_Branded_1707_SEA_PowerSoil__&kwid=%2Bpower%20%2Bsoil%20%2Brna	https://github.com/FranckLejzerowicz/protocols	TruSeq_Nano_PCR_free_Library_Preparation_Kit_single-end	uchime_4.2	TRUE	31.2	F1-C	15-G	CACTGATCAAGGGCACCACAAGAACGC	ATGCGTAGCCACCTATCACACAATCATG	FWD:_{AAGGGCACCACAAGAACGC}_REV:_{CCACCTATCACACAATCATG}	F1-C_15-G	CACTGATCAAGGGCACCACAAGAACGC_ATGCGTAGCCACCTATCACACAATCATG	DSMP_37F_DNA_A_1_1	15294031	TruSeq	normalized	2017-07-04	TruSeq1	Illumina	HiSeq_2500	none	lane_pool37F	30	22.46	4	42	initial_denaturation:95_5;_denaturation:_94_0.5;_annealing:52_0.2;_elongation:_72_1;_40_cycles;_final_elongation:72_2	4.4	6.82	30.01
37F.DNA.45.B	CCCGCCTG	CCCGCCTG	18S_rRNA	37F	37F	DNA	45	B	No	MIMARKS-survey	DSMP	gene|marine_metagenome|uncultured_microorganism|uncultured_organism|ecotype|biological_replicate|technical_replicate|interspecies_interaction_between_organisms	0	marine_abyssal_zone_biome	marine_oligotrophic_desert	mud	sediment	aerobe	https://www.qiagen.com/us/cmp/ecom/powersoilkits?COECM_MOBIO_Branded_1707_SEA_PowerSoil__&kwid=%2Bpower%20%2Bsoil%20%2Brna	https://github.com/FranckLejzerowicz/protocols	TruSeq_Nano_PCR_free_Library_Preparation_Kit_single-end	uchime_4.2	TRUE	31.2	F1-C	15-G	CACTGATCAAGGGCACCACAAGAACGC	ATGCGTAGCCACCTATCACACAATCATG	FWD:_{AAGGGCACCACAAGAACGC}_REV:_{CCACCTATCACACAATCATG}	F1-C_15-G	CACTGATCAAGGGCACCACAAGAACGC_ATGCGTAGCCACCTATCACACAATCATG	DSMP_37F_DNA_B_1_1	2278945	TruSeq	normalized	2017-07-04	TruSeq8	Illumina	HiSeq_2500	none	lane_pool37F	40	337.28	4	42	initial_denaturation:95_5;_denaturation:_94_0.5;_annealing:52_0.2;_elongation:_72_1;_40_cycles;_final_elongation:72_2	5.4	7.41	40.01
37F.DNA.46.A	CCCGCCTT	CCCGCCTT	18S_rRNA	37F	37F	DNA	46	A	No	MIMARKS-survey	DSMP	gene|marine_metagenome|uncultured_microorganism|uncultured_organism|ecotype|biological_replicate|technical_replicate|interspecies_interaction_between_organisms	0	marine_abyssal_zone_biome	marine_oligotrophic_desert	mud	sediment	aerobe	https://www.qiagen.com/us/cmp/ecom/powersoilkits?COECM_MOBIO_Branded_1707_SEA_PowerSoil__&kwid=%2Bpower%20%2Bsoil%20%2Brna	https://github.com/FranckLejzerowicz/protocols	TruSeq_Nano_PCR_free_Library_Preparation_Kit_single-end	uchime_4.2	TRUE	46.8	F1-C	15-I	CACTGATCAAGGGCACCACAAGAACGC	ATGTGCTCCCACCTATCACACAATCATG	FWD:_{AAGGGCACCACAAGAACGC}_REV:_{CCACCTATCACACAATCATG}	F1-C_15-I	CACTGATCAAGGGCACCACAAGAACGC_ATGTGCTCCCACCTATCACACAATCATG	DSMP_37F_DNA_A_1_2	15316119	TruSeq	normalized	2017-07-04	TruSeq4	Illumina	HiSeq_2500	none	lane_pool37F	27	20.04	4	42	initial_denaturation:95_5;_denaturation:_94_0.5;_annealing:52_0.2;_elongation:_72_1;_40_cycles;_final_elongation:72_2	8.2	3.29	26.98
37F.DNA.46.B	CCCGCGCC	CCCGCGCC	18S_rRNA	37F	37F	DNA	46	B	No	MIMARKS-survey	DSMP	gene|marine_metagenome|uncultured_microorganism|uncultured_organism|ecotype|biological_replicate|technical_replicate|interspecies_interaction_between_organisms	0	marine_abyssal_zone_biome	marine_oligotrophic_desert	mud	sediment	aerobe	https://www.qiagen.com/us/cmp/ecom/powersoilkits?COECM_MOBIO_Branded_1707_SEA_PowerSoil__&kwid=%2Bpower%20%2Bsoil%20%2Brna	https://github.com/FranckLejzerowicz/protocols	TruSeq_Nano_PCR_free_Library_Preparation_Kit_single-end	uchime_4.2	TRUE	46.8	F1-C	15-I	CACTGATCAAGGGCACCACAAGAACGC	ATGTGCTCCCACCTATCACACAATCATG	FWD:_{AAGGGCACCACAAGAACGC}_REV:_{CCACCTATCACACAATCATG}	F1-C_15-I	CACTGATCAAGGGCACCACAAGAACGC_ATGTGCTCCCACCTATCACACAATCATG	DSMP_37F_DNA_B_1_3	1877212	TruSeq	normalized	2017-07-04	TruSeq10	Illumina	HiSeq_2500	none	lane_pool37F	40	535.96	4	41	initial_denaturation:95_5;_denaturation:_94_0.5;_annealing:52_0.2;_elongation:_72_1;_40_cycles;_final_elongation:72_2	8.3	4.82	40.01
37F.DNA.47.A	CCCGCGCG	CCCGCGCG	18S_rRNA	37F	37F	DNA	47	A	No	MIMARKS-survey	DSMP	gene|marine_metagenome|uncultured_microorganism|uncultured_organism|ecotype|biological_replicate|technical_replicate|interspecies_interaction_between_organisms	0	marine_abyssal_zone_biome	marine_oligotrophic_desert	mud	sediment	aerobe	https://www.qiagen.com/us/cmp/ecom/powersoilkits?COECM_MOBIO_Branded_1707_SEA_PowerSoil__&kwid=%2Bpower%20%2Bsoil%20%2Brna	https://github.com/FranckLejzerowicz/protocols	TruSeq_Nano_PCR_free_Library_Preparation_Kit_single-end	uchime_4.2	TRUE	51	F1-C	15-P	CACTGATCAAGGGCACCACAAGAACGC	CTAGCATCCCACCTATCACACAATCATG	FWD:_{AAGGGCACCACAAGAACGC}_REV:_{CCACCTATCACACAATCATG}	F1-C_15-P	CACTGATCAAGGGCACCACAAGAACGC_CTAGCATCCCACCTATCACACAATCATG	DSMP_37F_DNA_A_1_3	18703377	TruSeq	normalized	2017-07-04	TruSeq5	Illumina	HiSeq_2500	none	lane_pool37F	27.5	17.75	4	41	initial_denaturation:95_5;_denaturation:_94_0.5;_annealing:52_0.2;_elongation:_72_1;_40_cycles;_final_elongation:72_2	5.1	5.39	27.49
37F.DNA.47.B	CCCGCGCT	CCCGCGCT	18S_rRNA	37F	37F	DNA	47	B	No	MIMARKS-survey	DSMP	gene|marine_metagenome|uncultured_microorganism|uncultured_organism|ecotype|biological_replicate|technical_replicate|interspecies_interaction_between_organisms	0	marine_abyssal_zone_biome	marine_oligotrophic_desert	mud	sediment	aerobe	https://www.qiagen.com/us/cmp/ecom/powersoilkits?COECM_MOBIO_Branded_1707_SEA_PowerSoil__&kwid=%2Bpower%20%2Bsoil%20%2Brna	https://github.com/FranckLejzerowicz/protocols	TruSeq_Nano_PCR_free_Library_Preparation_Kit_single-end	uchime_4.2	TRUE	51	F1-C	15-P	CACTGATCAAGGGCACCACAAGAACGC	CTAGCATCCCACCTATCACACAATCATG	FWD:_{AAGGGCACCACAAGAACGC}_REV:_{CCACCTATCACACAATCATG}	F1-C_15-P	CACTGATCAAGGGCACCACAAGAACGC_CTAGCATCCCACCTATCACACAATCATG	DSMP_37F_DNA_B_1_1	2278945	TruSeq	normalized	2017-07-04	TruSeq8	Illumina	HiSeq_2500	none	lane_pool37F	40	337.28	4	42	initial_denaturation:95_5;_denaturation:_94_0.5;_annealing:52_0.2;_elongation:_72_1;_40_cycles;_final_elongation:72_2	3.3	12.12	40
37F.DNA.48.A	CCCGCGGC	CCCGCGGC	18S_rRNA	37F	37F	DNA	48	A	No	MIMARKS-survey	DSMP	gene|marine_metagenome|uncultured_microorganism|uncultured_organism|ecotype|biological_replicate|technical_replicate|interspecies_interaction_between_organisms	0	marine_abyssal_zone_biome	marine_oligotrophic_desert	mud	sediment	aerobe	https://www.qiagen.com/us/cmp/ecom/powersoilkits?COECM_MOBIO_Branded_1707_SEA_PowerSoil__&kwid=%2Bpower%20%2Bsoil%20%2Brna	https://github.com/FranckLejzerowicz/protocols	TruSeq_Nano_PCR_free_Library_Preparation_Kit_single-end	uchime_4.2	TRUE	38.1	F1-C	15-R	CACTGATCAAGGGCACCACAAGAACGC	CTGTATATCCACCTATCACACAATCATG	FWD:_{AAGGGCACCACAAGAACGC}_REV:_{CCACCTATCACACAATCATG}	F1-C_15-R	CACTGATCAAGGGCACCACAAGAACGC_CTGTATATCCACCTATCACACAATCATG	DSMP_37F_DNA_A_1_3	18703377	TruSeq	normalized	2017-07-04	TruSeq5	Illumina	HiSeq_2500	none	lane_pool37F	27.5	17.75	4	41	initial_denaturation:95_5;_denaturation:_94_0.5;_annealing:52_0.2;_elongation:_72_1;_40_cycles;_final_elongation:72_2	1.1	25	27.5
37F.DNA.48.B	CCCGCGGG	CCCGCGGG	18S_rRNA	37F	37F	DNA	48	B	No	MIMARKS-survey	DSMP	gene|marine_metagenome|uncultured_microorganism|uncultured_organism|ecotype|biological_replicate|technical_replicate|interspecies_interaction_between_organisms	0	marine_abyssal_zone_biome	marine_oligotrophic_desert	mud	sediment	aerobe	https://www.qiagen.com/us/cmp/ecom/powersoilkits?COECM_MOBIO_Branded_1707_SEA_PowerSoil__&kwid=%2Bpower%20%2Bsoil%20%2Brna	https://github.com/FranckLejzerowicz/protocols	TruSeq_Nano_PCR_free_Library_Preparation_Kit_single-end	uchime_4.2	TRUE	38.1	F1-C	15-R	CACTGATCAAGGGCACCACAAGAACGC	CTGTATATCCACCTATCACACAATCATG	FWD:_{AAGGGCACCACAAGAACGC}_REV:_{CCACCTATCACACAATCATG}	F1-C_15-R	CACTGATCAAGGGCACCACAAGAACGC_CTGTATATCCACCTATCACACAATCATG	DSMP_37F_DNA_B_1_3	1877212	TruSeq	normalized	2017-07-04	TruSeq10	Illumina	HiSeq_2500	none	lane_pool37F	40	535.96	4	41	initial_denaturation:95_5;_denaturation:_94_0.5;_annealing:52_0.2;_elongation:_72_1;_40_cycles;_final_elongation:72_2	1.8	22.22	40
37F.DNA.49.A	CCCGCGGT	CCCGCGGT	18S_rRNA	37F	37F	DNA	49	A	No	MIMARKS-survey	DSMP	gene|marine_metagenome|uncultured_microorganism|uncultured_organism|ecotype|biological_replicate|technical_replicate|interspecies_interaction_between_organisms	0	marine_abyssal_zone_biome	marine_oligotrophic_desert	mud	sediment	aerobe	https://www.qiagen.com/us/cmp/ecom/powersoilkits?COECM_MOBIO_Branded_1707_SEA_PowerSoil__&kwid=%2Bpower%20%2Bsoil%20%2Brna	https://github.com/FranckLejzerowicz/protocols	TruSeq_Nano_PCR_free_Library_Preparation_Kit_single-end	uchime_4.2	TRUE	15.2	F1-H	15-Y	CGCACGTCAAGGGCACCACAAGAACGC	TGTCATAGCCACCTATCACACAATCATG	FWD:_{AAGGGCACCACAAGAACGC}_REV:_{CCACCTATCACACAATCATG}	F1-H_15-Y	CGCACGTCAAGGGCACCACAAGAACGC_TGTCATAGCCACCTATCACACAATCATG	AB02_37F_DNA_A_1_1	2007312	TruSeq	normalized	2016-05-20		Illumina	MiSeq	none	Lane_MiSeq_37F	40	115.46	4	47	initial_denaturation:95_5;_denaturation:_94_0.5;_annealing:52_0.2;_elongation:_72_1;_40_cycles;_final_elongation:72_2	8.94	4.47	39.96
37F.DNA.49.B	CCCGCGTC	CCCGCGTC	18S_rRNA	37F	37F	DNA	49	B	No	MIMARKS-survey	DSMP	gene|marine_metagenome|uncultured_microorganism|uncultured_organism|ecotype|biological_replicate|technical_replicate|interspecies_interaction_between_organisms	0	marine_abyssal_zone_biome	marine_oligotrophic_desert	mud	sediment	aerobe	https://www.qiagen.com/us/cmp/ecom/powersoilkits?COECM_MOBIO_Branded_1707_SEA_PowerSoil__&kwid=%2Bpower%20%2Bsoil%20%2Brna	https://github.com/FranckLejzerowicz/protocols	TruSeq_Nano_PCR_free_Library_Preparation_Kit_single-end	uchime_4.2	TRUE	15.2	F1-H	15-Y	CGCACGTCAAGGGCACCACAAGAACGC	TGTCATAGCCACCTATCACACAATCATG	FWD:_{AAGGGCACCACAAGAACGC}_REV:_{CCACCTATCACACAATCATG}	F1-H_15-Y	CGCACGTCAAGGGCACCACAAGAACGC_TGTCATAGCCACCTATCACACAATCATG	AB02_37F_DNA_B_1_1	1757175	TruSeq	normalized	2016-05-20		Illumina	MiSeq	none	Lane_MiSeq_37F	40	88.73	4	47	initial_denaturation:95_5;_denaturation:_94_0.5;_annealing:52_0.2;_elongation:_72_1;_40_cycles;_final_elongation:72_2	8.94	4.47	39.96
37F.DNA.50.A	CCCGCGTG	CCCGCGTG	18S_rRNA	37F	37F	DNA	50	A	No	MIMARKS-survey	DSMP	gene|marine_metagenome|uncultured_microorganism|uncultured_organism|ecotype|biological_replicate|technical_replicate|interspecies_interaction_between_organisms	0	marine_abyssal_zone_biome	marine_oligotrophic_desert	mud	sediment	aerobe	https://www.qiagen.com/us/cmp/ecom/powersoilkits?COECM_MOBIO_Branded_1707_SEA_PowerSoil__&kwid=%2Bpower%20%2Bsoil%20%2Brna	https://github.com/FranckLejzerowicz/protocols	TruSeq_Nano_PCR_free_Library_Preparation_Kit_single-end	uchime_4.2	TRUE	12.3	F1-I	15-A	GACTGTATAAGGGCACCACAAGAACGC	AGACACACCCACCTATCACACAATCATG	FWD:_{AAGGGCACCACAAGAACGC}_REV:_{CCACCTATCACACAATCATG}	F1-I_15-A	GACTGTATAAGGGCACCACAAGAACGC_AGACACACCCACCTATCACACAATCATG	AB02_37F_DNA_A_1_1	2007312	TruSeq	normalized	2016-05-20		Illumina	MiSeq	none	Lane_MiSeq_37F	40	115.46	4	47	initial_denaturation:95_5;_denaturation:_94_0.5;_annealing:52_0.2;_elongation:_72_1;_40_cycles;_final_elongation:72_2	7.2	5.56	40.03
37F.DNA.50.B	CCCGCGTT	CCCGCGTT	18S_rRNA	37F	37F	DNA	50	B	No	MIMARKS-survey	DSMP	gene|marine_metagenome|uncultured_microorganism|uncultured_organism|ecotype|biological_replicate|technical_replicate|interspecies_interaction_between_organisms	0	marine_abyssal_zone_biome	marine_oligotrophic_desert	mud	sediment	aerobe	https://www.qiagen.com/us/cmp/ecom/powersoilkits?COECM_MOBIO_Branded_1707_SEA_PowerSoil__&kwid=%2Bpower%20%2Bsoil%20%2Brna	https://github.com/FranckLejzerowicz/protocols	TruSeq_Nano_PCR_free_Library_Preparation_Kit_single-end	uchime_4.2	TRUE	12.3	F1-I	15-A	GACTGTATAAGGGCACCACAAGAACGC	AGACACACCCACCTATCACACAATCATG	FWD:_{AAGGGCACCACAAGAACGC}_REV:_{CCACCTATCACACAATCATG}	F1-I_15-A	GACTGTATAAGGGCACCACAAGAACGC_AGACACACCCACCTATCACACAATCATG	AB02_37F_DNA_B_1_1	1757175	TruSeq	normalized	2016-05-20		Illumina	MiSeq	none	Lane_MiSeq_37F	40	88.73	4	47	initial_denaturation:95_5;_denaturation:_94_0.5;_annealing:52_0.2;_elongation:_72_1;_40_cycles;_final_elongation:72_2	7.2	5.56	40.03
37F.DNA.51.A	CCCGCTCC	CCCGCTCC	18S_rRNA	37F	37F	DNA	51	A	No	MIMARKS-survey	DSMP	gene|marine_metagenome|uncultured_microorganism|uncultured_organism|ecotype|biological_replicate|technical_replicate|interspecies_interaction_between_organisms	0	marine_abyssal_zone_biome	marine_oligotrophic_desert	mud	sediment	aerobe	https://www.qiagen.com/us/cmp/ecom/powersoilkits?COECM_MOBIO_Branded_1707_SEA_PowerSoil__&kwid=%2Bpower%20%2Bsoil%20%2Brna	https://github.com/FranckLejzerowicz/protocols	TruSeq_Nano_PCR_free_Library_Preparation_Kit_single-end	uchime_4.2	TRUE	14.5	F1-I	15-E	GACTGTATAAGGGCACCACAAGAACGC	ATAGACTGCCACCTATCACACAATCATG	FWD:_{AAGGGCACCACAAGAACGC}_REV:_{CCACCTATCACACAATCATG}	F1-I_15-E	GACTGTATAAGGGCACCACAAGAACGC_ATAGACTGCCACCTATCACACAATCATG	AB02_37F_DNA_A_1_1	2007312	TruSeq	normalized	2016-05-20		Illumina	MiSeq	none	Lane_MiSeq_37F	40	115.46	4	47	initial_denaturation:95_5;_denaturation:_94_0.5;_annealing:52_0.2;_elongation:_72_1;_40_cycles;_final_elongation:72_2	14.5	2.76	40.02
37F.DNA.51.B	CCCGCTCG	CCCGCTCG	18S_rRNA	37F	37F	DNA	51	B	No	MIMARKS-survey	DSMP	gene|marine_metagenome|uncultured_microorganism|uncultured_organism|ecotype|biological_replicate|technical_replicate|interspecies_interaction_between_organisms	0	marine_abyssal_zone_biome	marine_oligotrophic_desert	mud	sediment	aerobe	https://www.qiagen.com/us/cmp/ecom/powersoilkits?COECM_MOBIO_Branded_1707_SEA_PowerSoil__&kwid=%2Bpower%20%2Bsoil%20%2Brna	https://github.com/FranckLejzerowicz/protocols	TruSeq_Nano_PCR_free_Library_Preparation_Kit_single-end	uchime_4.2	TRUE	14.5	F1-I	15-E	GACTGTATAAGGGCACCACAAGAACGC	ATAGACTGCCACCTATCACACAATCATG	FWD:_{AAGGGCACCACAAGAACGC}_REV:_{CCACCTATCACACAATCATG}	F1-I_15-E	GACTGTATAAGGGCACCACAAGAACGC_ATAGACTGCCACCTATCACACAATCATG	AB02_37F_DNA_B_1_1	1757175	TruSeq	normalized	2016-05-20		Illumina	MiSeq	none	Lane_MiSeq_37F	40	88.73	4	47	initial_denaturation:95_5;_denaturation:_94_0.5;_annealing:52_0.2;_elongation:_72_1;_40_cycles;_final_elongation:72_2	14.5	2.76	40.02
37F.DNA.52.A	CCCGCTCT	CCCGCTCT	18S_rRNA	37F	37F	DNA	52	A	No	MIMARKS-survey	DSMP	gene|marine_metagenome|uncultured_microorganism|uncultured_organism|ecotype|biological_replicate|technical_replicate|interspecies_interaction_between_organisms	0	marine_abyssal_zone_biome	marine_oligotrophic_desert	mud	sediment	aerobe	https://www.qiagen.com/us/cmp/ecom/powersoilkits?COECM_MOBIO_Branded_1707_SEA_PowerSoil__&kwid=%2Bpower%20%2Bsoil%20%2Brna	https://github.com/FranckLejzerowicz/protocols	TruSeq_Nano_PCR_free_Library_Preparation_Kit_single-end	uchime_4.2	TRUE	11	F1-I	15-I	GACTGTATAAGGGCACCACAAGAACGC	ATGTGCTCCCACCTATCACACAATCATG	FWD:_{AAGGGCACCACAAGAACGC}_REV:_{CCACCTATCACACAATCATG}	F1-I_15-I	GACTGTATAAGGGCACCACAAGAACGC_ATGTGCTCCCACCTATCACACAATCATG	AB02_37F_DNA_A_1_1	2007312	TruSeq	normalized	2016-05-20		Illumina	MiSeq	none	Lane_MiSeq_37F	40	115.46	4	47	initial_denaturation:95_5;_denaturation:_94_0.5;_annealing:52_0.2;_elongation:_72_1;_40_cycles;_final_elongation:72_2	14.7	2.72	39.98
37F.DNA.52.B	CCCGCTGC	CCCGCTGC	18S_rRNA	37F	37F	DNA	52	B	No	MIMARKS-survey	DSMP	gene|marine_metagenome|uncultured_microorganism|uncultured_organism|ecotype|biological_replicate|technical_replicate|interspecies_interaction_between_organisms	0	marine_abyssal_zone_biome	marine_oligotrophic_desert	mud	sediment	aerobe	https://www.qiagen.com/us/cmp/ecom/powersoilkits?COECM_MOBIO_Branded_1707_SEA_PowerSoil__&kwid=%2Bpower%20%2Bsoil%20%2Brna	https://github.com/FranckLejzerowicz/protocols	TruSeq_Nano_PCR_free_Library_Preparation_Kit_single-end	uchime_4.2	TRUE	11	F1-I	15-I	GACTGTATAAGGGCACCACAAGAACGC	ATGTGCTCCCACCTATCACACAATCATG	FWD:_{AAGGGCACCACAAGAACGC}_REV:_{CCACCTATCACACAATCATG}	F1-I_15-I	GACTGTATAAGGGCACCACAAGAACGC_ATGTGCTCCCACCTATCACACAATCATG	AB02_37F_DNA_B_1_1	1757175	TruSeq	normalized	2016-05-20		Illumina	MiSeq	none	Lane_MiSeq_37F	40	88.73	4	47	initial_denaturation:95_5;_denaturation:_94_0.5;_annealing:52_0.2;_elongation:_72_1;_40_cycles;_final_elongation:72_2	14.7	2.72	39.98
37F.DNA.53.A	CCCGCTGG	CCCGCTGG	18S_rRNA	37F	37F	DNA	53	A	No	MIMARKS-survey	DSMP	gene|marine_metagenome|uncultured_microorganism|uncultured_organism|ecotype|biological_replicate|technical_replicate|interspecies_interaction_between_organisms	0	marine_abyssal_zone_biome	marine_oligotrophic_desert	mud	sediment	aerobe	https://www.qiagen.com/us/cmp/ecom/powersoilkits?COECM_MOBIO_Branded_1707_SEA_PowerSoil__&kwid=%2Bpower%20%2Bsoil%20%2Brna	https://github.com/FranckLejzerowicz/protocols	TruSeq_Nano_PCR_free_Library_Preparation_Kit_single-end	uchime_4.2	TRUE	13.8	F1-I	15-L	GACTGTATAAGGGCACCACAAGAACGC	CATGCAGTCCACCTATCACACAATCATG	FWD:_{AAGGGCACCACAAGAACGC}_REV:_{CCACCTATCACACAATCATG}	F1-I_15-L	GACTGTATAAGGGCACCACAAGAACGC_CATGCAGTCCACCTATCACACAATCATG	AB02_37F_DNA_A_1_1	2007312	TruSeq	normalized	2016-05-20		Illumina	MiSeq	none	Lane_MiSeq_37F	40	115.46	4	47	initial_denaturation:95_5;_denaturation:_94_0.5;_annealing:52_0.2;_elongation:_72_1;_40_cycles;_final_elongation:72_2	17	2.35	39.95
37F.DNA.53.B	CCCGCTGT	CCCGCTGT	18S_rRNA	37F	37F	DNA	53	B	No	MIMARKS-survey	DSMP	gene|marine_metagenome|uncultured_microorganism|uncultured_organism|ecotype|biological_replicate|technical_replicate|interspecies_interaction_between_organisms	0	marine_abyssal_zone_biome	marine_oligotrophic_desert	mud	sediment	aerobe	https://www.qiagen.com/us/cmp/ecom/powersoilkits?COECM_MOBIO_Branded_1707_SEA_PowerSoil__&kwid=%2Bpower%20%2Bsoil%20%2Brna	https://github.com/FranckLejzerowicz/protocols	TruSeq_Nano_PCR_free_Library_Preparation_Kit_single-end	uchime_4.2	TRUE	13.8	F1-I	15-L	GACTGTATAAGGGCACCACAAGAACGC	CATGCAGTCCACCTATCACACAATCATG	FWD:_{AAGGGCACCACAAGAACGC}_REV:_{CCACCTATCACACAATCATG}	F1-I_15-L	GACTGTATAAGGGCACCACAAGAACGC_CATGCAGTCCACCTATCACACAATCATG	AB02_37F_DNA_B_1_1	1757175	TruSeq	normalized	2016-05-20		Illumina	MiSeq	none	Lane_MiSeq_37F	40	88.73	4	47	initial_denaturation:95_5;_denaturation:_94_0.5;_annealing:52_0.2;_elongation:_72_1;_40_cycles;_final_elongation:72_2	16.6	2.41	40.01
37F.DNA.54.A	CCCGCTTC	CCCGCTTC	18S_rRNA	37F	37F	DNA	54	A	No	MIMARKS-survey	DSMP	gene|marine_metagenome|uncultured_microorganism|uncultured_organism|ecotype|biological_replicate|technical_replicate|interspecies_interaction_between_organisms	0	marine_abyssal_zone_biome	marine_oligotrophic_desert	mud	sediment	aerobe	https://www.qiagen.com/us/cmp/ecom/powersoilkits?COECM_MOBIO_Branded_1707_SEA_PowerSoil__&kwid=%2Bpower%20%2Bsoil%20%2Brna	https://github.com/FranckLejzerowicz/protocols	TruSeq_Nano_PCR_free_Library_Preparation_Kit_single-end	uchime_4.2	TRUE	12.1	F1-J	15-G	GAGACTCTAAGGGCACCACAAGAACGC	ATGCGTAGCCACCTATCACACAATCATG	FWD:_{AAGGGCACCACAAGAACGC}_REV:_{CCACCTATCACACAATCATG}	F1-J_15-G	GAGACTCTAAGGGCACCACAAGAACGC_ATGCGTAGCCACCTATCACACAATCATG	AB02_37F_DNA_A_1_1	2007312	TruSeq	normalized	2016-05-20		Illumina	MiSeq	none	Lane_MiSeq_37F	40	115.46	4	47	initial_denaturation:95_5;_denaturation:_94_0.5;_annealing:52_0.2;_elongation:_72_1;_40_cycles;_final_elongation:72_2	11.3	3.54	40
37F.DNA.54.B	CCCGCTTG	CCCGCTTG	18S_rRNA	37F	37F	DNA	54	B	No	MIMARKS-survey	DSMP	gene|marine_metagenome|uncultured_microorganism|uncultured_organism|ecotype|biological_replicate|technical_replicate|interspecies_interaction_between_organisms	0	marine_abyssal_zone_biome	marine_oligotrophic_desert	mud	sediment	aerobe	https://www.qiagen.com/us/cmp/ecom/powersoilkits?COECM_MOBIO_Branded_1707_SEA_PowerSoil__&kwid=%2Bpower%20%2Bsoil%20%2Brna	https://github.com/FranckLejzerowicz/protocols	TruSeq_Nano_PCR_free_Library_Preparation_Kit_single-end	uchime_4.2	TRUE	12.1	F1-J	15-G	GAGACTCTAAGGGCACCACAAGAACGC	ATGCGTAGCCACCTATCACACAATCATG	FWD:_{AAGGGCACCACAAGAACGC}_REV:_{CCACCTATCACACAATCATG}	F1-J_15-G	GAGACTCTAAGGGCACCACAAGAACGC_ATGCGTAGCCACCTATCACACAATCATG	AB02_37F_DNA_B_1_1	1757175	TruSeq	normalized	2016-05-20		Illumina	MiSeq	none	Lane_MiSeq_37F	40	88.73	4	47	initial_denaturation:95_5;_denaturation:_94_0.5;_annealing:52_0.2;_elongation:_72_1;_40_cycles;_final_elongation:72_2	11.3	3.54	40
37F.DNA.55.A	CCCGCTTT	CCCGCTTT	18S_rRNA	37F	37F	DNA	55	A	No	MIMARKS-survey	DSMP	gene|marine_metagenome|uncultured_microorganism|uncultured_organism|ecotype|biological_replicate|technical_replicate|interspecies_interaction_between_organisms	0	marine_abyssal_zone_biome	marine_oligotrophic_desert	mud	sediment	aerobe	https://www.qiagen.com/us/cmp/ecom/powersoilkits?COECM_MOBIO_Branded_1707_SEA_PowerSoil__&kwid=%2Bpower%20%2Bsoil%20%2Brna	https://github.com/FranckLejzerowicz/protocols	TruSeq_Nano_PCR_free_Library_Preparation_Kit_single-end	uchime_4.2	TRUE	14.6	F1-J	15-M	GAGACTCTAAGGGCACCACAAGAACGC	CGACGAGCCCACCTATCACACAATCATG	FWD:_{AAGGGCACCACAAGAACGC}_REV:_{CCACCTATCACACAATCATG}	F1-J_15-M	GAGACTCTAAGGGCACCACAAGAACGC_CGACGAGCCCACCTATCACACAATCATG	AB02_37F_DNA_A_1_1	2007312	TruSeq	normalized	2016-05-20		Illumina	MiSeq	none	Lane_MiSeq_37F	40	115.46	4	47	initial_denaturation:95_5;_denaturation:_94_0.5;_annealing:52_0.2;_elongation:_72_1;_40_cycles;_final_elongation:72_2	16.2	2.47	40.01
37F.DNA.55.B	CCCGGCCC	CCCGGCCC	18S_rRNA	37F	37F	DNA	55	B	No	MIMARKS-survey	DSMP	gene|marine_metagenome|uncultured_microorganism|uncultured_organism|ecotype|biological_replicate|technical_replicate|interspecies_interaction_between_organisms	0	marine_abyssal_zone_biome	marine_oligotrophic_desert	mud	sediment	aerobe	https://www.qiagen.com/us/cmp/ecom/powersoilkits?COECM_MOBIO_Branded_1707_SEA_PowerSoil__&kwid=%2Bpower%20%2Bsoil%20%2Brna	https://github.com/FranckLejzerowicz/protocols	TruSeq_Nano_PCR_free_Library_Preparation_Kit_single-end	uchime_4.2	TRUE	14.6	F1-J	15-M	GAGACTCTAAGGGCACCACAAGAACGC	CGACGAGCCCACCTATCACACAATCATG	FWD:_{AAGGGCACCACAAGAACGC}_REV:_{CCACCTATCACACAATCATG}	F1-J_15-M	GAGACTCTAAGGGCACCACAAGAACGC_CGACGAGCCCACCTATCACACAATCATG	AB02_37F_DNA_B_1_1	1757175	TruSeq	normalized	2016-05-20		Illumina	MiSeq	none	Lane_MiSeq_37F	40	88.73	4	47	initial_denaturation:95_5;_denaturation:_94_0.5;_annealing:52_0.2;_elongation:_72_1;_40_cycles;_final_elongation:72_2	16.2	2.47	40.01
37F.DNA.56.A	CCCGGCCG	CCCGGCCG	18S_rRNA	37F	37F	DNA	56	A	No	MIMARKS-survey	DSMP	gene|marine_metagenome|uncultured_microorganism|uncultured_organism|ecotype|biological_replicate|technical_replicate|interspecies_interaction_between_organisms	0	marine_abyssal_zone_biome	marine_oligotrophic_desert	mud	sediment	aerobe	https://www.qiagen.com/us/cmp/ecom/powersoilkits?COECM_MOBIO_Branded_1707_SEA_PowerSoil__&kwid=%2Bpower%20%2Bsoil%20%2Brna	https://github.com/FranckLejzerowicz/protocols	TruSeq_Nano_PCR_free_Library_Preparation_Kit_single-end	uchime_4.2	TRUE	12.8	F1-J	15-R	GAGACTCTAAGGGCACCACAAGAACGC	CTGTATATCCACCTATCACACAATCATG	FWD:_{AAGGGCACCACAAGAACGC}_REV:_{CCACCTATCACACAATCATG}	F1-J_15-R	GAGACTCTAAGGGCACCACAAGAACGC_CTGTATATCCACCTATCACACAATCATG	AB02_37F_DNA_A_1_1	2007312	TruSeq	normalized	2016-05-20		Illumina	MiSeq	none	Lane_MiSeq_37F	40	115.46	4	47	initial_denaturation:95_5;_denaturation:_94_0.5;_annealing:52_0.2;_elongation:_72_1;_40_cycles;_final_elongation:72_2	11.8	3.39	40
37F.DNA.56.B	CCCGGCCT	CCCGGCCT	18S_rRNA	37F	37F	DNA	56	B	No	MIMARKS-survey	DSMP	gene|marine_metagenome|uncultured_microorganism|uncultured_organism|ecotype|biological_replicate|technical_replicate|interspecies_interaction_between_organisms	0	marine_abyssal_zone_biome	marine_oligotrophic_desert	mud	sediment	aerobe	https://www.qiagen.com/us/cmp/ecom/powersoilkits?COECM_MOBIO_Branded_1707_SEA_PowerSoil__&kwid=%2Bpower%20%2Bsoil%20%2Brna	https://github.com/FranckLejzerowicz/protocols	TruSeq_Nano_PCR_free_Library_Preparation_Kit_single-end	uchime_4.2	TRUE	12.8	F1-J	15-R	GAGACTCTAAGGGCACCACAAGAACGC	CTGTATATCCACCTATCACACAATCATG	FWD:_{AAGGGCACCACAAGAACGC}_REV:_{CCACCTATCACACAATCATG}	F1-J_15-R	GAGACTCTAAGGGCACCACAAGAACGC_CTGTATATCCACCTATCACACAATCATG	AB02_37F_DNA_B_1_1	1757175	TruSeq	normalized	2016-05-20		Illumina	MiSeq	none	Lane_MiSeq_37F	40	88.73	4	47	initial_denaturation:95_5;_denaturation:_94_0.5;_annealing:52_0.2;_elongation:_72_1;_40_cycles;_final_elongation:72_2	11.8	3.39	40
37F.DNA.58.A	CCCGGCGT	CCCGGCGT	18S_rRNA	37F	37F	DNA	58	A	No	MIMARKS-survey	DSMP	gene|marine_metagenome|uncultured_microorganism|uncultured_organism|ecotype|biological_replicate|technical_replicate|interspecies_interaction_between_organisms	0	marine_abyssal_zone_biome	marine_oligotrophic_desert	mud	sediment	aerobe	https://www.qiagen.com/us/cmp/ecom/powersoilkits?COECM_MOBIO_Branded_1707_SEA_PowerSoil__&kwid=%2Bpower%20%2Bsoil%20%2Brna	https://github.com/FranckLejzerowicz/protocols	TruSeq_Nano_PCR_free_Library_Preparation_Kit_single-end	uchime_4.2	TRUE	13.9	F1-K	15-K	GAGAGATAAAGGGCACCACAAGAACGC	CATCGTACCCACCTATCACACAATCATG	FWD:_{AAGGGCACCACAAGAACGC}_REV:_{CCACCTATCACACAATCATG}	F1-K_15-K	GAGAGATAAAGGGCACCACAAGAACGC_CATCGTACCCACCTATCACACAATCATG	AB02_37F_DNA_A_1_1	2007312	TruSeq	normalized	2016-05-20		Illumina	MiSeq	none	Lane_MiSeq_37F	40	115.46	4	47	initial_denaturation:95_5;_denaturation:_94_0.5;_annealing:52_0.2;_elongation:_72_1;_40_cycles;_final_elongation:72_2	13.8	2.9	40.02
37F.DNA.58.B	CCCGGCTC	CCCGGCTC	18S_rRNA	37F	37F	DNA	58	B	No	MIMARKS-survey	DSMP	gene|marine_metagenome|uncultured_microorganism|uncultured_organism|ecotype|biological_replicate|technical_replicate|interspecies_interaction_between_organisms	0	marine_abyssal_zone_biome	marine_oligotrophic_desert	mud	sediment	aerobe	https://www.qiagen.com/us/cmp/ecom/powersoilkits?COECM_MOBIO_Branded_1707_SEA_PowerSoil__&kwid=%2Bpower%20%2Bsoil%20%2Brna	https://github.com/FranckLejzerowicz/protocols	TruSeq_Nano_PCR_free_Library_Preparation_Kit_single-end	uchime_4.2	TRUE	13.9	F1-K	15-K	GAGAGATAAAGGGCACCACAAGAACGC	CATCGTACCCACCTATCACACAATCATG	FWD:_{AAGGGCACCACAAGAACGC}_REV:_{CCACCTATCACACAATCATG}	F1-K_15-K	GAGAGATAAAGGGCACCACAAGAACGC_CATCGTACCCACCTATCACACAATCATG	AB02_37F_DNA_B_1_1	1757175	TruSeq	normalized	2016-05-20		Illumina	MiSeq	none	Lane_MiSeq_37F	40	88.73	4	47	initial_denaturation:95_5;_denaturation:_94_0.5;_annealing:52_0.2;_elongation:_72_1;_40_cycles;_final_elongation:72_2	13.8	2.9	40.02
37F.DNA.59.A	CCCGGCTG	CCCGGCTG	18S_rRNA	37F	37F	DNA	59	A	No	MIMARKS-survey	DSMP	gene|marine_metagenome|uncultured_microorganism|uncultured_organism|ecotype|biological_replicate|technical_replicate|interspecies_interaction_between_organisms	0	marine_abyssal_zone_biome	marine_oligotrophic_desert	mud	sediment	aerobe	https://www.qiagen.com/us/cmp/ecom/powersoilkits?COECM_MOBIO_Branded_1707_SEA_PowerSoil__&kwid=%2Bpower%20%2Bsoil%20%2Brna	https://github.com/FranckLejzerowicz/protocols	TruSeq_Nano_PCR_free_Library_Preparation_Kit_single-end	uchime_4.2	TRUE	14.2	F1-K	15-O	GAGAGATAAAGGGCACCACAAGAACGC	CGAGCTAGCCACCTATCACACAATCATG	FWD:_{AAGGGCACCACAAGAACGC}_REV:_{CCACCTATCACACAATCATG}	F1-K_15-O	GAGAGATAAAGGGCACCACAAGAACGC_CGAGCTAGCCACCTATCACACAATCATG	AB02_37F_DNA_A_1_1	2007312	TruSeq	normalized	2016-05-20		Illumina	MiSeq	none	Lane_MiSeq_37F	40	115.46	4	47	initial_denaturation:95_5;_denaturation:_94_0.5;_annealing:52_0.2;_elongation:_72_1;_40_cycles;_final_elongation:72_2	14.6	2.74	40
37F.DNA.59.B	CCCGGCTT	CCCGGCTT	18S_rRNA	37F	37F	DNA	59	B	No	MIMARKS-survey	DSMP	gene|marine_metagenome|uncultured_microorganism|uncultured_organism|ecotype|biological_replicate|technical_replicate|interspecies_interaction_between_organisms	0	marine_abyssal_zone_biome	marine_oligotrophic_desert	mud	sediment	aerobe	https://www.qiagen.com/us/cmp/ecom/powersoilkits?COECM_MOBIO_Branded_1707_SEA_PowerSoil__&kwid=%2Bpower%20%2Bsoil%20%2Brna	https://github.com/FranckLejzerowicz/protocols	TruSeq_Nano_PCR_free_Library_Preparation_Kit_single-end	uchime_4.2	TRUE	14.2	F1-K	15-O	GAGAGATAAAGGGCACCACAAGAACGC	CGAGCTAGCCACCTATCACACAATCATG	FWD:_{AAGGGCACCACAAGAACGC}_REV:_{CCACCTATCACACAATCATG}	F1-K_15-O	GAGAGATAAAGGGCACCACAAGAACGC_CGAGCTAGCCACCTATCACACAATCATG	AB02_37F_DNA_B_1_1	1757175	TruSeq	normalized	2016-05-20		Illumina	MiSeq	none	Lane_MiSeq_37F	40	88.73	4	47	initial_denaturation:95_5;_denaturation:_94_0.5;_annealing:52_0.2;_elongation:_72_1;_40_cycles;_final_elongation:72_2	14.6	2.74	40
37F.DNA.60.A	CCCGGGCC	CCCGGGCC	18S_rRNA	37F	37F	DNA	60	A	No	MIMARKS-survey	DSMP	gene|marine_metagenome|uncultured_microorganism|uncultured_organism|ecotype|biological_replicate|technical_replicate|interspecies_interaction_between_organisms	0	marine_abyssal_zone_biome	marine_oligotrophic_desert	mud	sediment	aerobe	https://www.qiagen.com/us/cmp/ecom/powersoilkits?COECM_MOBIO_Branded_1707_SEA_PowerSoil__&kwid=%2Bpower%20%2Bsoil%20%2Brna	https://github.com/FranckLejzerowicz/protocols	TruSeq_Nano_PCR_free_Library_Preparation_Kit_single-end	uchime_4.2	TRUE	14.9	F1-K	15-Q	GAGAGATAAAGGGCACCACAAGAACGC	CTGCACGCCCACCTATCACACAATCATG	FWD:_{AAGGGCACCACAAGAACGC}_REV:_{CCACCTATCACACAATCATG}	F1-K_15-Q	GAGAGATAAAGGGCACCACAAGAACGC_CTGCACGCCCACCTATCACACAATCATG	AB02_37F_DNA_A_1_1	2007312	TruSeq	normalized	2016-05-20		Illumina	MiSeq	none	Lane_MiSeq_37F	40	115.46	4	47	initial_denaturation:95_5;_denaturation:_94_0.5;_annealing:52_0.2;_elongation:_72_1;_40_cycles;_final_elongation:72_2	16.3	2.45	39.94
37F.DNA.60.B	CCCGGGCG	CCCGGGCG	18S_rRNA	37F	37F	DNA	60	B	No	MIMARKS-survey	DSMP	gene|marine_metagenome|uncultured_microorganism|uncultured_organism|ecotype|biological_replicate|technical_replicate|interspecies_interaction_between_organisms	0	marine_abyssal_zone_biome	marine_oligotrophic_desert	mud	sediment	aerobe	https://www.qiagen.com/us/cmp/ecom/powersoilkits?COECM_MOBIO_Branded_1707_SEA_PowerSoil__&kwid=%2Bpower%20%2Bsoil%20%2Brna	https://github.com/FranckLejzerowicz/protocols	TruSeq_Nano_PCR_free_Library_Preparation_Kit_single-end	uchime_4.2	TRUE	14.9	F1-K	15-Q	GAGAGATAAAGGGCACCACAAGAACGC	CTGCACGCCCACCTATCACACAATCATG	FWD:_{AAGGGCACCACAAGAACGC}_REV:_{CCACCTATCACACAATCATG}	F1-K_15-Q	GAGAGATAAAGGGCACCACAAGAACGC_CTGCACGCCCACCTATCACACAATCATG	AB02_37F_DNA_B_1_1	1757175	TruSeq	normalized	2016-05-20		Illumina	MiSeq	none	Lane_MiSeq_37F	40	88.73	4	47	initial_denaturation:95_5;_denaturation:_94_0.5;_annealing:52_0.2;_elongation:_72_1;_40_cycles;_final_elongation:72_2	16.3	2.45	39.94
37F.DNA.61.A	CCCGGGCT	CCCGGGCT	18S_rRNA	37F	37F	DNA	61	A	No	MIMARKS-survey	DSMP	gene|marine_metagenome|uncultured_microorganism|uncultured_organism|ecotype|biological_replicate|technical_replicate|interspecies_interaction_between_organisms	0	marine_abyssal_zone_biome	marine_oligotrophic_desert	mud	sediment	aerobe	https://www.qiagen.com/us/cmp/ecom/powersoilkits?COECM_MOBIO_Branded_1707_SEA_PowerSoil__&kwid=%2Bpower%20%2Bsoil%20%2Brna	https://github.com/FranckLejzerowicz/protocols	TruSeq_Nano_PCR_free_Library_Preparation_Kit_single-end	uchime_4.2	TRUE	16.1	F1-K	15-X	GAGAGATAAAGGGCACCACAAGAACGC	TGATGCATCCACCTATCACACAATCATG	FWD:_{AAGGGCACCACAAGAACGC}_REV:_{CCACCTATCACACAATCATG}	F1-K_15-X	GAGAGATAAAGGGCACCACAAGAACGC_TGATGCATCCACCTATCACACAATCATG	AB02_37F_DNA_A_1_1	2007312	TruSeq	normalized	2016-05-20		Illumina	MiSeq	none	Lane_MiSeq_37F	40	115.46	4	47	initial_denaturation:95_5;_denaturation:_94_0.5;_annealing:52_0.2;_elongation:_72_1;_40_cycles;_final_elongation:72_2	9.24	4.33	40.01
37F.DNA.61.B	CCCGGGGC	CCCGGGGC	18S_rRNA	37F	37F	DNA	61	B	No	MIMARKS-survey	DSMP	gene|marine_metagenome|uncultured_microorganism|uncultured_organism|ecotype|biological_replicate|technical_replicate|interspecies_interaction_between_organisms	0	marine_abyssal_zone_biome	marine_oligotrophic_desert	mud	sediment	aerobe	https://www.qiagen.com/us/cmp/ecom/powersoilkits?COECM_MOBIO_Branded_1707_SEA_PowerSoil__&kwid=%2Bpower%20%2Bsoil%20%2Brna	https://github.com/FranckLejzerowicz/protocols	TruSeq_Nano_PCR_free_Library_Preparation_Kit_single-end	uchime_4.2	TRUE	16.1	F1-K	15-X	GAGAGATAAAGGGCACCACAAGAACGC	TGATGCATCCACCTATCACACAATCATG	FWD:_{AAGGGCACCACAAGAACGC}_REV:_{CCACCTATCACACAATCATG}	F1-K_15-X	GAGAGATAAAGGGCACCACAAGAACGC_TGATGCATCCACCTATCACACAATCATG	AB02_37F_DNA_B_1_1	1757175	TruSeq	normalized	2016-05-20		Illumina	MiSeq	none	Lane_MiSeq_37F	40	88.73	4	47	initial_denaturation:95_5;_denaturation:_94_0.5;_annealing:52_0.2;_elongation:_72_1;_40_cycles;_final_elongation:72_2	9.24	4.33	40.01
37F.DNA.62.A	CCCGGGGG	CCCGGGGG	18S_rRNA	37F	37F	DNA	62	A	No	MIMARKS-survey	DSMP	gene|marine_metagenome|uncultured_microorganism|uncultured_organism|ecotype|biological_replicate|technical_replicate|interspecies_interaction_between_organisms	0	marine_abyssal_zone_biome	marine_oligotrophic_desert	mud	sediment	aerobe	https://www.qiagen.com/us/cmp/ecom/powersoilkits?COECM_MOBIO_Branded_1707_SEA_PowerSoil__&kwid=%2Bpower%20%2Bsoil%20%2Brna	https://github.com/FranckLejzerowicz/protocols	TruSeq_Nano_PCR_free_Library_Preparation_Kit_single-end	uchime_4.2	TRUE	14.6	F1-L	15-N	GCACTGCAAAGGGCACCACAAGAACGC	CGAGACGTCCACCTATCACACAATCATG	FWD:_{AAGGGCACCACAAGAACGC}_REV:_{CCACCTATCACACAATCATG}	F1-L_15-N	GCACTGCAAAGGGCACCACAAGAACGC_CGAGACGTCCACCTATCACACAATCATG	AB02_37F_DNA_A_1_1	2007312	TruSeq	normalized	2016-05-20		Illumina	MiSeq	none	Lane_MiSeq_37F	40	115.46	4	47	initial_denaturation:95_5;_denaturation:_94_0.5;_annealing:52_0.2;_elongation:_72_1;_40_cycles;_final_elongation:72_2	14.5	2.76	40.02
37F.DNA.62.B	CCCGGGGT	CCCGGGGT	18S_rRNA	37F	37F	DNA	62	B	No	MIMARKS-survey	DSMP	gene|marine_metagenome|uncultured_microorganism|uncultured_organism|ecotype|biological_replicate|technical_replicate|interspecies_interaction_between_organisms	0	marine_abyssal_zone_biome	marine_oligotrophic_desert	mud	sediment	aerobe	https://www.qiagen.com/us/cmp/ecom/powersoilkits?COECM_MOBIO_Branded_1707_SEA_PowerSoil__&kwid=%2Bpower%20%2Bsoil%20%2Brna	https://github.com/FranckLejzerowicz/protocols	TruSeq_Nano_PCR_free_Library_Preparation_Kit_single-end	uchime_4.2	TRUE	14.6	F1-L	15-N	GCACTGCAAAGGGCACCACAAGAACGC	CGAGACGTCCACCTATCACACAATCATG	FWD:_{AAGGGCACCACAAGAACGC}_REV:_{CCACCTATCACACAATCATG}	F1-L_15-N	GCACTGCAAAGGGCACCACAAGAACGC_CGAGACGTCCACCTATCACACAATCATG	AB02_37F_DNA_B_1_1	1757175	TruSeq	normalized	2016-05-20		Illumina	MiSeq	none	Lane_MiSeq_37F	40	88.73	4	47	initial_denaturation:95_5;_denaturation:_94_0.5;_annealing:52_0.2;_elongation:_72_1;_40_cycles;_final_elongation:72_2	14.5	2.76	40.02
37F.DNA.63.A	CCCGGGTC	CCCGGGTC	18S_rRNA	37F	37F	DNA	63	A	No	MIMARKS-survey	DSMP	gene|marine_metagenome|uncultured_microorganism|uncultured_organism|ecotype|biological_replicate|technical_replicate|interspecies_interaction_between_organisms	0	marine_abyssal_zone_biome	marine_oligotrophic_desert	mud	sediment	aerobe	https://www.qiagen.com/us/cmp/ecom/powersoilkits?COECM_MOBIO_Branded_1707_SEA_PowerSoil__&kwid=%2Bpower%20%2Bsoil%20%2Brna	https://github.com/FranckLejzerowicz/protocols	TruSeq_Nano_PCR_free_Library_Preparation_Kit_single-end	uchime_4.2	TRUE	17	F1-L	15-P	GCACTGCAAAGGGCACCACAAGAACGC	CTAGCATCCCACCTATCACACAATCATG	FWD:_{AAGGGCACCACAAGAACGC}_REV:_{CCACCTATCACACAATCATG}	F1-L_15-P	GCACTGCAAAGGGCACCACAAGAACGC_CTAGCATCCCACCTATCACACAATCATG	AB02_37F_DNA_A_1_1	2007312	TruSeq	normalized	2016-05-20		Illumina	MiSeq	none	Lane_MiSeq_37F	40	115.46	4	47	initial_denaturation:95_5;_denaturation:_94_0.5;_annealing:52_0.2;_elongation:_72_1;_40_cycles;_final_elongation:72_2	12.2	3.28	40.02
37F.DNA.63.B	CCCGGGTG	CCCGGGTG	18S_rRNA	37F	37F	DNA	63	B	No	MIMARKS-survey	DSMP	gene|marine_metagenome|uncultured_microorganism|uncultured_organism|ecotype|biological_replicate|technical_replicate|interspecies_interaction_between_organisms	0	marine_abyssal_zone_biome	marine_oligotrophic_desert	mud	sediment	aerobe	https://www.qiagen.com/us/cmp/ecom/powersoilkits?COECM_MOBIO_Branded_1707_SEA_PowerSoil__&kwid=%2Bpower%20%2Bsoil%20%2Brna	https://github.com/FranckLejzerowicz/protocols	TruSeq_Nano_PCR_free_Library_Preparation_Kit_single-end	uchime_4.2	TRUE	17	F1-L	15-P	GCACTGCAAAGGGCACCACAAGAACGC	CTAGCATCCCACCTATCACACAATCATG	FWD:_{AAGGGCACCACAAGAACGC}_REV:_{CCACCTATCACACAATCATG}	F1-L_15-P	GCACTGCAAAGGGCACCACAAGAACGC_CTAGCATCCCACCTATCACACAATCATG	AB02_37F_DNA_B_1_1	1757175	TruSeq	normalized	2016-05-20		Illumina	MiSeq	none	Lane_MiSeq_37F	40	88.73	4	47	initial_denaturation:95_5;_denaturation:_94_0.5;_annealing:52_0.2;_elongation:_72_1;_40_cycles;_final_elongation:72_2	12.2	3.28	40.02
37F.DNA.64.A	CCCGGGTT	CCCGGGTT	18S_rRNA	37F	37F	DNA	64	A	No	MIMARKS-survey	DSMP	gene|marine_metagenome|uncultured_microorganism|uncultured_organism|ecotype|biological_replicate|technical_replicate|interspecies_interaction_between_organisms	0	marine_abyssal_zone_biome	marine_oligotrophic_desert	mud	sediment	aerobe	https://www.qiagen.com/us/cmp/ecom/powersoilkits?COECM_MOBIO_Branded_1707_SEA_PowerSoil__&kwid=%2Bpower%20%2Bsoil%20%2Brna	https://github.com/FranckLejzerowicz/protocols	TruSeq_Nano_PCR_free_Library_Preparation_Kit_single-end	uchime_4.2	TRUE	15.8	F1-L	15-V	GCACTGCAAAGGGCACCACAAGAACGC	TATGACATCCACCTATCACACAATCATG	FWD:_{AAGGGCACCACAAGAACGC}_REV:_{CCACCTATCACACAATCATG}	F1-L_15-V	GCACTGCAAAGGGCACCACAAGAACGC_TATGACATCCACCTATCACACAATCATG	AB02_37F_DNA_A_1_1	2007312	TruSeq	normalized	2016-05-20		Illumina	MiSeq	none	Lane_MiSeq_37F	40	115.46	4	47	initial_denaturation:95_5;_denaturation:_94_0.5;_annealing:52_0.2;_elongation:_72_1;_40_cycles;_final_elongation:72_2	8.74	4.58	40.03
37F.DNA.64.B	CCCGGTCC	CCCGGTCC	18S_rRNA	37F	37F	DNA	64	B	No	MIMARKS-survey	DSMP	gene|marine_metagenome|uncultured_microorganism|uncultured_organism|ecotype|biological_replicate|technical_replicate|interspecies_interaction_between_organisms	0	marine_abyssal_zone_biome	marine_oligotrophic_desert	mud	sediment	aerobe	https://www.qiagen.com/us/cmp/ecom/powersoilkits?COECM_MOBIO_Branded_1707_SEA_PowerSoil__&kwid=%2Bpower%20%2Bsoil%20%2Brna	https://github.com/FranckLejzerowicz/protocols	TruSeq_Nano_PCR_free_Library_Preparation_Kit_single-end	uchime_4.2	TRUE	15.8	F1-L	15-V	GCACTGCAAAGGGCACCACAAGAACGC	TATGACATCCACCTATCACACAATCATG	FWD:_{AAGGGCACCACAAGAACGC}_REV:_{CCACCTATCACACAATCATG}	F1-L_15-V	GCACTGCAAAGGGCACCACAAGAACGC_TATGACATCCACCTATCACACAATCATG	AB02_37F_DNA_B_1_1	1757175	TruSeq	normalized	2016-05-20		Illumina	MiSeq	none	Lane_MiSeq_37F	40	88.73	4	47	initial_denaturation:95_5;_denaturation:_94_0.5;_annealing:52_0.2;_elongation:_72_1;_40_cycles;_final_elongation:72_2	8.74	4.58	40.03
37F.DNA.65.A	CCCGGTCG	CCCGGTCG	18S_rRNA	37F	37F	DNA	65	A	No	MIMARKS-survey	DSMP	gene|marine_metagenome|uncultured_microorganism|uncultured_organism|ecotype|biological_replicate|technical_replicate|interspecies_interaction_between_organisms	0	marine_abyssal_zone_biome	marine_oligotrophic_desert	mud	sediment	aerobe	https://www.qiagen.com/us/cmp/ecom/powersoilkits?COECM_MOBIO_Branded_1707_SEA_PowerSoil__&kwid=%2Bpower%20%2Bsoil%20%2Brna	https://github.com/FranckLejzerowicz/protocols	TruSeq_Nano_PCR_free_Library_Preparation_Kit_single-end	uchime_4.2	TRUE	16.7	F1-M	15-E	GCATCATCAAGGGCACCACAAGAACGC	ATAGACTGCCACCTATCACACAATCATG	FWD:_{AAGGGCACCACAAGAACGC}_REV:_{CCACCTATCACACAATCATG}	F1-M_15-E	GCATCATCAAGGGCACCACAAGAACGC_ATAGACTGCCACCTATCACACAATCATG	AB02_37F_DNA_A_1_1	2007312	TruSeq	normalized	2016-05-20		Illumina	MiSeq	none	Lane_MiSeq_37F	40	115.46	4	47	initial_denaturation:95_5;_denaturation:_94_0.5;_annealing:52_0.2;_elongation:_72_1;_40_cycles;_final_elongation:72_2	12.1	3.31	40.05
37F.DNA.65.B	CCCGGTCT	CCCGGTCT	18S_rRNA	37F	37F	DNA	65	B	No	MIMARKS-survey	DSMP	gene|marine_metagenome|uncultured_microorganism|uncultured_organism|ecotype|biological_replicate|technical_replicate|interspecies_interaction_between_organisms	0	marine_abyssal_zone_biome	marine_oligotrophic_desert	mud	sediment	aerobe	https://www.qiagen.com/us/cmp/ecom/powersoilkits?COECM_MOBIO_Branded_1707_SEA_PowerSoil__&kwid=%2Bpower%20%2Bsoil%20%2Brna	https://github.com/FranckLejzerowicz/protocols	TruSeq_Nano_PCR_free_Library_Preparation_Kit_single-end	uchime_4.2	TRUE	16.7	F1-M	15-E	GCATCATCAAGGGCACCACAAGAACGC	ATAGACTGCCACCTATCACACAATCATG	FWD:_{AAGGGCACCACAAGAACGC}_REV:_{CCACCTATCACACAATCATG}	F1-M_15-E	GCATCATCAAGGGCACCACAAGAACGC_ATAGACTGCCACCTATCACACAATCATG	AB02_37F_DNA_B_1_1	1757175	TruSeq	normalized	2016-05-20		Illumina	MiSeq	none	Lane_MiSeq_37F	40	88.73	4	47	initial_denaturation:95_5;_denaturation:_94_0.5;_annealing:52_0.2;_elongation:_72_1;_40_cycles;_final_elongation:72_2	12.1	3.31	40.05
37F.DNA.66.A	CCCGGTGC	CCCGGTGC	18S_rRNA	37F	37F	DNA	66	A	No	MIMARKS-survey	DSMP	gene|marine_metagenome|uncultured_microorganism|uncultured_organism|ecotype|biological_replicate|technical_replicate|interspecies_interaction_between_organisms	0	marine_abyssal_zone_biome	marine_oligotrophic_desert	mud	sediment	aerobe	https://www.qiagen.com/us/cmp/ecom/powersoilkits?COECM_MOBIO_Branded_1707_SEA_PowerSoil__&kwid=%2Bpower%20%2Bsoil%20%2Brna	https://github.com/FranckLejzerowicz/protocols	TruSeq_Nano_PCR_free_Library_Preparation_Kit_single-end	uchime_4.2	TRUE	16.1	F1-M	15-L	GCATCATCAAGGGCACCACAAGAACGC	CATGCAGTCCACCTATCACACAATCATG	FWD:_{AAGGGCACCACAAGAACGC}_REV:_{CCACCTATCACACAATCATG}	F1-M_15-L	GCATCATCAAGGGCACCACAAGAACGC_CATGCAGTCCACCTATCACACAATCATG	AB02_37F_DNA_A_1_1	2007312	TruSeq	normalized	2016-05-20		Illumina	MiSeq	none	Lane_MiSeq_37F	40	115.46	4	47	initial_denaturation:95_5;_denaturation:_94_0.5;_annealing:52_0.2;_elongation:_72_1;_40_cycles;_final_elongation:72_2	12.1	3.31	40.05
37F.DNA.66.B	CCCGGTGG	CCCGGTGG	18S_rRNA	37F	37F	DNA	66	B	No	MIMARKS-survey	DSMP	gene|marine_metagenome|uncultured_microorganism|uncultured_organism|ecotype|biological_replicate|technical_replicate|interspecies_interaction_between_organisms	0	marine_abyssal_zone_biome	marine_oligotrophic_desert	mud	sediment	aerobe	https://www.qiagen.com/us/cmp/ecom/powersoilkits?COECM_MOBIO_Branded_1707_SEA_PowerSoil__&kwid=%2Bpower%20%2Bsoil%20%2Brna	https://github.com/FranckLejzerowicz/protocols	TruSeq_Nano_PCR_free_Library_Preparation_Kit_single-end	uchime_4.2	TRUE	16.1	F1-M	15-L	GCATCATCAAGGGCACCACAAGAACGC	CATGCAGTCCACCTATCACACAATCATG	FWD:_{AAGGGCACCACAAGAACGC}_REV:_{CCACCTATCACACAATCATG}	F1-M_15-L	GCATCATCAAGGGCACCACAAGAACGC_CATGCAGTCCACCTATCACACAATCATG	AB02_37F_DNA_B_1_1	1757175	TruSeq	normalized	2016-05-20		Illumina	MiSeq	none	Lane_MiSeq_37F	40	88.73	4	47	initial_denaturation:95_5;_denaturation:_94_0.5;_annealing:52_0.2;_elongation:_72_1;_40_cycles;_final_elongation:72_2	12.1	3.31	40.05
37F.DNA.67.A	CCCGGTGT	CCCGGTGT	18S_rRNA	37F	37F	DNA	67	A	No	MIMARKS-survey	DSMP	gene|marine_metagenome|uncultured_microorganism|uncultured_organism|ecotype|biological_replicate|technical_replicate|interspecies_interaction_between_organisms	0	marine_abyssal_zone_biome	marine_oligotrophic_desert	mud	sediment	aerobe	https://www.qiagen.com/us/cmp/ecom/powersoilkits?COECM_MOBIO_Branded_1707_SEA_PowerSoil__&kwid=%2Bpower%20%2Bsoil%20%2Brna	https://github.com/FranckLejzerowicz/protocols	TruSeq_Nano_PCR_free_Library_Preparation_Kit_single-end	uchime_4.2	TRUE	39.9	F1-D	15-J	CAGCGTACAAGGGCACCACAAGAACGC	CAGTGCAGCCACCTATCACACAATCATG	FWD:_{AAGGGCACCACAAGAACGC}_REV:_{CCACCTATCACACAATCATG}	F1-D_15-J	CAGCGTACAAGGGCACCACAAGAACGC_CAGTGCAGCCACCTATCACACAATCATG	DSMP_37F_DNA_A_1_2	15316119	TruSeq	normalized	2017-07-04	TruSeq4	Illumina	HiSeq_2500	none	lane_pool37F	27	20.04	4	42	initial_denaturation:95_5;_denaturation:_94_0.5;_annealing:52_0.2;_elongation:_72_1;_40_cycles;_final_elongation:72_2	4.7	5.75	27.03
37F.DNA.67.B	CCCGGTTC	CCCGGTTC	18S_rRNA	37F	37F	DNA	67	B	No	MIMARKS-survey	DSMP	gene|marine_metagenome|uncultured_microorganism|uncultured_organism|ecotype|biological_replicate|technical_replicate|interspecies_interaction_between_organisms	0	marine_abyssal_zone_biome	marine_oligotrophic_desert	mud	sediment	aerobe	https://www.qiagen.com/us/cmp/ecom/powersoilkits?COECM_MOBIO_Branded_1707_SEA_PowerSoil__&kwid=%2Bpower%20%2Bsoil%20%2Brna	https://github.com/FranckLejzerowicz/protocols	TruSeq_Nano_PCR_free_Library_Preparation_Kit_single-end	uchime_4.2	TRUE	39.9	F1-D	15-J	CAGCGTACAAGGGCACCACAAGAACGC	CAGTGCAGCCACCTATCACACAATCATG	FWD:_{AAGGGCACCACAAGAACGC}_REV:_{CCACCTATCACACAATCATG}	F1-D_15-J	CAGCGTACAAGGGCACCACAAGAACGC_CAGTGCAGCCACCTATCACACAATCATG	DSMP_37F_DNA_B_1_2	2198874	TruSeq	normalized	2017-07-04	TruSeq9	Illumina	HiSeq_2500	none	lane_pool37F	40	307.78	4	42	initial_denaturation:95_5;_denaturation:_94_0.5;_annealing:52_0.2;_elongation:_72_1;_40_cycles;_final_elongation:72_2	4.2	9.52	39.98
37F.DNA.68.A	CCCGGTTG	CCCGGTTG	18S_rRNA	37F	37F	DNA	68	A	No	MIMARKS-survey	DSMP	gene|marine_metagenome|uncultured_microorganism|uncultured_organism|ecotype|biological_replicate|technical_replicate|interspecies_interaction_between_organisms	0	marine_abyssal_zone_biome	marine_oligotrophic_desert	mud	sediment	aerobe	https://www.qiagen.com/us/cmp/ecom/powersoilkits?COECM_MOBIO_Branded_1707_SEA_PowerSoil__&kwid=%2Bpower%20%2Bsoil%20%2Brna	https://github.com/FranckLejzerowicz/protocols	TruSeq_Nano_PCR_free_Library_Preparation_Kit_single-end	uchime_4.2	TRUE	1.03	F1-D	15-S	CAGCGTACAAGGGCACCACAAGAACGC	TAGCATGTCCACCTATCACACAATCATG	FWD:_{AAGGGCACCACAAGAACGC}_REV:_{CCACCTATCACACAATCATG}	F1-D_15-S	CAGCGTACAAGGGCACCACAAGAACGC_TAGCATGTCCACCTATCACACAATCATG	DSMP_37F_DNA_A_1_3	18703377	TruSeq	normalized	2017-07-04	TruSeq5	Illumina	HiSeq_2500	none	lane_pool37F	27.5	17.75	4	41	initial_denaturation:95_5;_denaturation:_94_0.5;_annealing:52_0.2;_elongation:_72_1;_40_cycles;_final_elongation:72_2	1.08	25.46	27.5
37F.DNA.68.B	CCCGGTTT	CCCGGTTT	18S_rRNA	37F	37F	DNA	68	B	No	MIMARKS-survey	DSMP	gene|marine_metagenome|uncultured_microorganism|uncultured_organism|ecotype|biological_replicate|technical_replicate|interspecies_interaction_between_organisms	0	marine_abyssal_zone_biome	marine_oligotrophic_desert	mud	sediment	aerobe	https://www.qiagen.com/us/cmp/ecom/powersoilkits?COECM_MOBIO_Branded_1707_SEA_PowerSoil__&kwid=%2Bpower%20%2Bsoil%20%2Brna	https://github.com/FranckLejzerowicz/protocols	TruSeq_Nano_PCR_free_Library_Preparation_Kit_single-end	uchime_4.2	TRUE	1.03	F1-D	15-S	CAGCGTACAAGGGCACCACAAGAACGC	TAGCATGTCCACCTATCACACAATCATG	FWD:_{AAGGGCACCACAAGAACGC}_REV:_{CCACCTATCACACAATCATG}	F1-D_15-S	CAGCGTACAAGGGCACCACAAGAACGC_TAGCATGTCCACCTATCACACAATCATG	DSMP_37F_DNA_B_1_2	2198874	TruSeq	normalized	2017-07-04	TruSeq9	Illumina	HiSeq_2500	none	lane_pool37F	40	307.78	4	42	initial_denaturation:95_5;_denaturation:_94_0.5;_annealing:52_0.2;_elongation:_72_1;_40_cycles;_final_elongation:72_2	0.84	50	42
37F.DNA.69.A	CCCGTCCC	CCCGTCCC	18S_rRNA	37F	37F	DNA	69	A	No	MIMARKS-survey	DSMP	gene|marine_metagenome|uncultured_microorganism|uncultured_organism|ecotype|biological_replicate|technical_replicate|interspecies_interaction_between_organisms	0	marine_abyssal_zone_biome	marine_oligotrophic_desert	mud	sediment	aerobe	https://www.qiagen.com/us/cmp/ecom/powersoilkits?COECM_MOBIO_Branded_1707_SEA_PowerSoil__&kwid=%2Bpower%20%2Bsoil%20%2Brna	https://github.com/FranckLejzerowicz/protocols	TruSeq_Nano_PCR_free_Library_Preparation_Kit_single-end	uchime_4.2	TRUE	28.3	F1-D	15-V	CAGCGTACAAGGGCACCACAAGAACGC	TATGACATCCACCTATCACACAATCATG	FWD:_{AAGGGCACCACAAGAACGC}_REV:_{CCACCTATCACACAATCATG}	F1-D_15-V	CAGCGTACAAGGGCACCACAAGAACGC_TATGACATCCACCTATCACACAATCATG	DSMP_37F_DNA_A_1_1	15294031	TruSeq	normalized	2017-07-04	TruSeq1	Illumina	HiSeq_2500	none	lane_pool37F	30	22.46	4	42	initial_denaturation:95_5;_denaturation:_94_0.5;_annealing:52_0.2;_elongation:_72_1;_40_cycles;_final_elongation:72_2	1.04	50	52
37F.DNA.69.B	CCCGTCCG	CCCGTCCG	18S_rRNA	37F	37F	DNA	69	B	No	MIMARKS-survey	DSMP	gene|marine_metagenome|uncultured_microorganism|uncultured_organism|ecotype|biological_replicate|technical_replicate|interspecies_interaction_between_organisms	0	marine_abyssal_zone_biome	marine_oligotrophic_desert	mud	sediment	aerobe	https://www.qiagen.com/us/cmp/ecom/powersoilkits?COECM_MOBIO_Branded_1707_SEA_PowerSoil__&kwid=%2Bpower%20%2Bsoil%20%2Brna	https://github.com/FranckLejzerowicz/protocols	TruSeq_Nano_PCR_free_Library_Preparation_Kit_single-end	uchime_4.2	TRUE	28.3	F1-D	15-V	CAGCGTACAAGGGCACCACAAGAACGC	TATGACATCCACCTATCACACAATCATG	FWD:_{AAGGGCACCACAAGAACGC}_REV:_{CCACCTATCACACAATCATG}	F1-D_15-V	CAGCGTACAAGGGCACCACAAGAACGC_TATGACATCCACCTATCACACAATCATG	DSMP_37F_DNA_B_1_1	2278945	TruSeq	normalized	2017-07-04	TruSeq8	Illumina	HiSeq_2500	none	lane_pool37F	40	337.28	4	42	initial_denaturation:95_5;_denaturation:_94_0.5;_annealing:52_0.2;_elongation:_72_1;_40_cycles;_final_elongation:72_2	1.08	50	54
37F.DNA.70.A	CCCGTCCT	CCCGTCCT	18S_rRNA	37F	37F	DNA	70	A	No	MIMARKS-survey	DSMP	gene|marine_metagenome|uncultured_microorganism|uncultured_organism|ecotype|biological_replicate|technical_replicate|interspecies_interaction_between_organisms	0	marine_abyssal_zone_biome	marine_oligotrophic_desert	mud	sediment	aerobe	https://www.qiagen.com/us/cmp/ecom/powersoilkits?COECM_MOBIO_Branded_1707_SEA_PowerSoil__&kwid=%2Bpower%20%2Bsoil%20%2Brna	https://github.com/FranckLejzerowicz/protocols	TruSeq_Nano_PCR_free_Library_Preparation_Kit_single-end	uchime_4.2	TRUE	35.7	F1-D	15-W	CAGCGTACAAGGGCACCACAAGAACGC	TGATATGCCCACCTATCACACAATCATG	FWD:_{AAGGGCACCACAAGAACGC}_REV:_{CCACCTATCACACAATCATG}	F1-D_15-W	CAGCGTACAAGGGCACCACAAGAACGC_TGATATGCCCACCTATCACACAATCATG	DSMP_37F_DNA_A_1_2	15316119	TruSeq	normalized	2017-07-04	TruSeq4	Illumina	HiSeq_2500	none	lane_pool37F	27	20.04	4	42	initial_denaturation:95_5;_denaturation:_94_0.5;_annealing:52_0.2;_elongation:_72_1;_40_cycles;_final_elongation:72_2	2.6	10.38	26.99
37F.DNA.70.B	CCCGTCGC	CCCGTCGC	18S_rRNA	37F	37F	DNA	70	B	No	MIMARKS-survey	DSMP	gene|marine_metagenome|uncultured_microorganism|uncultured_organism|ecotype|biological_replicate|technical_replicate|interspecies_interaction_between_organisms	0	marine_abyssal_zone_biome	marine_oligotrophic_desert	mud	sediment	aerobe	https://www.qiagen.com/us/cmp/ecom/powersoilkits?COECM_MOBIO_Branded_1707_SEA_PowerSoil__&kwid=%2Bpower%20%2Bsoil%20%2Brna	https://github.com/FranckLejzerowicz/protocols	TruSeq_Nano_PCR_free_Library_Preparation_Kit_single-end	uchime_4.2	TRUE	35.7	F1-D	15-W	CAGCGTACAAGGGCACCACAAGAACGC	TGATATGCCCACCTATCACACAATCATG	FWD:_{AAGGGCACCACAAGAACGC}_REV:_{CCACCTATCACACAATCATG}	F1-D_15-W	CAGCGTACAAGGGCACCACAAGAACGC_TGATATGCCCACCTATCACACAATCATG	DSMP_37F_DNA_B_1_3	1877212	TruSeq	normalized	2017-07-04	TruSeq10	Illumina	HiSeq_2500	none	lane_pool37F	40	535.96	4	41	initial_denaturation:95_5;_denaturation:_94_0.5;_annealing:52_0.2;_elongation:_72_1;_40_cycles;_final_elongation:72_2	1.84	21.74	40
37F.DNA.71.A	CCCGTCGG	CCCGTCGG	18S_rRNA	37F	37F	DNA	71	A	No	MIMARKS-survey	DSMP	gene|marine_metagenome|uncultured_microorganism|uncultured_organism|ecotype|biological_replicate|technical_replicate|interspecies_interaction_between_organisms	0	marine_abyssal_zone_biome	marine_oligotrophic_desert	mud	sediment	aerobe	https://www.qiagen.com/us/cmp/ecom/powersoilkits?COECM_MOBIO_Branded_1707_SEA_PowerSoil__&kwid=%2Bpower%20%2Bsoil%20%2Brna	https://github.com/FranckLejzerowicz/protocols	TruSeq_Nano_PCR_free_Library_Preparation_Kit_single-end	uchime_4.2	TRUE	32	F1-D	15-X	CAGCGTACAAGGGCACCACAAGAACGC	TGATGCATCCACCTATCACACAATCATG	FWD:_{AAGGGCACCACAAGAACGC}_REV:_{CCACCTATCACACAATCATG}	F1-D_15-X	CAGCGTACAAGGGCACCACAAGAACGC_TGATGCATCCACCTATCACACAATCATG	DSMP_37F_DNA_A_1_1	15294031	TruSeq	normalized	2017-07-04	TruSeq1	Illumina	HiSeq_2500	none	lane_pool37F	30	22.46	4	42	initial_denaturation:95_5;_denaturation:_94_0.5;_annealing:52_0.2;_elongation:_72_1;_40_cycles;_final_elongation:72_2	1.52	19.74	30
37F.DNA.71.B	CCCGTCGT	CCCGTCGT	18S_rRNA	37F	37F	DNA	71	B	No	MIMARKS-survey	DSMP	gene|marine_metagenome|uncultured_microorganism|uncultured_organism|ecotype|biological_replicate|technical_replicate|interspecies_interaction_between_organisms	0	marine_abyssal_zone_biome	marine_oligotrophic_desert	mud	sediment	aerobe	https://www.qiagen.com/us/cmp/ecom/powersoilkits?COECM_MOBIO_Branded_1707_SEA_PowerSoil__&kwid=%2Bpower%20%2Bsoil%20%2Brna	https://github.com/FranckLejzerowicz/protocols	TruSeq_Nano_PCR_free_Library_Preparation_Kit_single-end	uchime_4.2	TRUE	32	F1-D	15-X	CAGCGTACAAGGGCACCACAAGAACGC	TGATGCATCCACCTATCACACAATCATG	FWD:_{AAGGGCACCACAAGAACGC}_REV:_{CCACCTATCACACAATCATG}	F1-D_15-X	CAGCGTACAAGGGCACCACAAGAACGC_TGATGCATCCACCTATCACACAATCATG	DSMP_37F_DNA_B_1_2	2198874	TruSeq	normalized	2017-07-04	TruSeq9	Illumina	HiSeq_2500	none	lane_pool37F	40	307.78	4	42	initial_denaturation:95_5;_denaturation:_94_0.5;_annealing:52_0.2;_elongation:_72_1;_40_cycles;_final_elongation:72_2	1.52	26.32	40.01
37F.DNA.74.A	CCCGTCTT	CCCGTCTT	18S_rRNA	37F	37F	DNA	74	A	No	MIMARKS-survey	DSMP	gene|marine_metagenome|uncultured_microorganism|uncultured_organism|ecotype|biological_replicate|technical_replicate|interspecies_interaction_between_organisms	0	marine_abyssal_zone_biome	marine_oligotrophic_desert	mud	sediment	aerobe	https://www.qiagen.com/us/cmp/ecom/powersoilkits?COECM_MOBIO_Branded_1707_SEA_PowerSoil__&kwid=%2Bpower%20%2Bsoil%20%2Brna	https://github.com/FranckLejzerowicz/protocols	TruSeq_Nano_PCR_free_Library_Preparation_Kit_single-end	uchime_4.2	TRUE	17.3	F1-M	15-Y	GCATCATCAAGGGCACCACAAGAACGC	TGTCATAGCCACCTATCACACAATCATG	FWD:_{AAGGGCACCACAAGAACGC}_REV:_{CCACCTATCACACAATCATG}	F1-M_15-Y	GCATCATCAAGGGCACCACAAGAACGC_TGTCATAGCCACCTATCACACAATCATG	AB02_37F_DNA_A_2_1	1515177	TruSeq	normalized	2016-05-20		Illumina	MiSeq	none	Lane_MiSeq_37F	40	112.19	4	46	initial_denaturation:95_5;_denaturation:_94_0.5;_annealing:52_0.2;_elongation:_72_1;_40_cycles;_final_elongation:72_2	8.45	4.73	39.97
37F.DNA.74.B	CCCGTGCC	CCCGTGCC	18S_rRNA	37F	37F	DNA	74	B	No	MIMARKS-survey	DSMP	gene|marine_metagenome|uncultured_microorganism|uncultured_organism|ecotype|biological_replicate|technical_replicate|interspecies_interaction_between_organisms	0	marine_abyssal_zone_biome	marine_oligotrophic_desert	mud	sediment	aerobe	https://www.qiagen.com/us/cmp/ecom/powersoilkits?COECM_MOBIO_Branded_1707_SEA_PowerSoil__&kwid=%2Bpower%20%2Bsoil%20%2Brna	https://github.com/FranckLejzerowicz/protocols	TruSeq_Nano_PCR_free_Library_Preparation_Kit_single-end	uchime_4.2	TRUE	17.3	F1-M	15-Y	GCATCATCAAGGGCACCACAAGAACGC	TGTCATAGCCACCTATCACACAATCATG	FWD:_{AAGGGCACCACAAGAACGC}_REV:_{CCACCTATCACACAATCATG}	F1-M_15-Y	GCATCATCAAGGGCACCACAAGAACGC_TGTCATAGCCACCTATCACACAATCATG	AB02_37F_DNA_B_2_1	1717014	TruSeq	normalized	2016-05-20		Illumina	MiSeq	none	Lane_MiSeq_37F	40	86.68	4	46	initial_denaturation:95_5;_denaturation:_94_0.5;_annealing:52_0.2;_elongation:_72_1;_40_cycles;_final_elongation:72_2	8.45	4.73	39.97
37F.DNA.76.A	CCCGTGGC	CCCGTGGC	18S_rRNA	37F	37F	DNA	76	A	No	MIMARKS-survey	DSMP	gene|marine_metagenome|uncultured_microorganism|uncultured_organism|ecotype|biological_replicate|technical_replicate|interspecies_interaction_between_organisms	0	marine_abyssal_zone_biome	marine_oligotrophic_desert	mud	sediment	aerobe	https://www.qiagen.com/us/cmp/ecom/powersoilkits?COECM_MOBIO_Branded_1707_SEA_PowerSoil__&kwid=%2Bpower%20%2Bsoil%20%2Brna	https://github.com/FranckLejzerowicz/protocols	TruSeq_Nano_PCR_free_Library_Preparation_Kit_single-end	uchime_4.2	TRUE	18	F1-N	15-J	GCGATGTCAAGGGCACCACAAGAACGC	CAGTGCAGCCACCTATCACACAATCATG	FWD:_{AAGGGCACCACAAGAACGC}_REV:_{CCACCTATCACACAATCATG}	F1-N_15-J	GCGATGTCAAGGGCACCACAAGAACGC_CAGTGCAGCCACCTATCACACAATCATG	AB02_37F_DNA_A_2_1	1515177	TruSeq	normalized	2016-05-20		Illumina	MiSeq	none	Lane_MiSeq_37F	40	112.19	4	46	initial_denaturation:95_5;_denaturation:_94_0.5;_annealing:52_0.2;_elongation:_72_1;_40_cycles;_final_elongation:72_2	12.8	3.13	40.06
37F.DNA.76.B	CCCGTGGG	CCCGTGGG	18S_rRNA	37F	37F	DNA	76	B	No	MIMARKS-survey	DSMP	gene|marine_metagenome|uncultured_microorganism|uncultured_organism|ecotype|biological_replicate|technical_replicate|interspecies_interaction_between_organisms	0	marine_abyssal_zone_biome	marine_oligotrophic_desert	mud	sediment	aerobe	https://www.qiagen.com/us/cmp/ecom/powersoilkits?COECM_MOBIO_Branded_1707_SEA_PowerSoil__&kwid=%2Bpower%20%2Bsoil%20%2Brna	https://github.com/FranckLejzerowicz/protocols	TruSeq_Nano_PCR_free_Library_Preparation_Kit_single-end	uchime_4.2	TRUE	18	F1-N	15-J	GCGATGTCAAGGGCACCACAAGAACGC	CAGTGCAGCCACCTATCACACAATCATG	FWD:_{AAGGGCACCACAAGAACGC}_REV:_{CCACCTATCACACAATCATG}	F1-N_15-J	GCGATGTCAAGGGCACCACAAGAACGC_CAGTGCAGCCACCTATCACACAATCATG	AB02_37F_DNA_B_2_1	1717014	TruSeq	normalized	2016-05-20		Illumina	MiSeq	none	Lane_MiSeq_37F	40	86.68	4	46	initial_denaturation:95_5;_denaturation:_94_0.5;_annealing:52_0.2;_elongation:_72_1;_40_cycles;_final_elongation:72_2	12.8	3.13	40.06
37F.DNA.77.A	CCCGTGGT	CCCGTGGT	18S_rRNA	37F	37F	DNA	77	A	No	MIMARKS-survey	DSMP	gene|marine_metagenome|uncultured_microorganism|uncultured_organism|ecotype|biological_replicate|technical_replicate|interspecies_interaction_between_organisms	0	marine_abyssal_zone_biome	marine_oligotrophic_desert	mud	sediment	aerobe	https://www.qiagen.com/us/cmp/ecom/powersoilkits?COECM_MOBIO_Branded_1707_SEA_PowerSoil__&kwid=%2Bpower%20%2Bsoil%20%2Brna	https://github.com/FranckLejzerowicz/protocols	TruSeq_Nano_PCR_free_Library_Preparation_Kit_single-end	uchime_4.2	TRUE	18.3	F1-N	15-R	GCGATGTCAAGGGCACCACAAGAACGC	CTGTATATCCACCTATCACACAATCATG	FWD:_{AAGGGCACCACAAGAACGC}_REV:_{CCACCTATCACACAATCATG}	F1-N_15-R	GCGATGTCAAGGGCACCACAAGAACGC_CTGTATATCCACCTATCACACAATCATG	AB02_37F_DNA_A_2_1	1515177	TruSeq	normalized	2016-05-20		Illumina	MiSeq	none	Lane_MiSeq_37F	40	112.19	4	46	initial_denaturation:95_5;_denaturation:_94_0.5;_annealing:52_0.2;_elongation:_72_1;_40_cycles;_final_elongation:72_2	10.3	3.88	39.96
37F.DNA.77.B	CCCGTGTC	CCCGTGTC	18S_rRNA	37F	37F	DNA	77	B	No	MIMARKS-survey	DSMP	gene|marine_metagenome|uncultured_microorganism|uncultured_organism|ecotype|biological_replicate|technical_replicate|interspecies_interaction_between_organisms	0	marine_abyssal_zone_biome	marine_oligotrophic_desert	mud	sediment	aerobe	https://www.qiagen.com/us/cmp/ecom/powersoilkits?COECM_MOBIO_Branded_1707_SEA_PowerSoil__&kwid=%2Bpower%20%2Bsoil%20%2Brna	https://github.com/FranckLejzerowicz/protocols	TruSeq_Nano_PCR_free_Library_Preparation_Kit_single-end	uchime_4.2	TRUE	18.3	F1-N	15-R	GCGATGTCAAGGGCACCACAAGAACGC	CTGTATATCCACCTATCACACAATCATG	FWD:_{AAGGGCACCACAAGAACGC}_REV:_{CCACCTATCACACAATCATG}	F1-N_15-R	GCGATGTCAAGGGCACCACAAGAACGC_CTGTATATCCACCTATCACACAATCATG	AB02_37F_DNA_B_2_1	1717014	TruSeq	normalized	2016-05-20		Illumina	MiSeq	none	Lane_MiSeq_37F	40	86.68	4	46	initial_denaturation:95_5;_denaturation:_94_0.5;_annealing:52_0.2;_elongation:_72_1;_40_cycles;_final_elongation:72_2	10.3	3.88	39.96
37F.DNA.78.A	CCCGTGTG	CCCGTGTG	18S_rRNA	37F	37F	DNA	78	A	No	MIMARKS-survey	DSMP	gene|marine_metagenome|uncultured_microorganism|uncultured_organism|ecotype|biological_replicate|technical_replicate|interspecies_interaction_between_organisms	0	marine_abyssal_zone_biome	marine_oligotrophic_desert	mud	sediment	aerobe	https://www.qiagen.com/us/cmp/ecom/powersoilkits?COECM_MOBIO_Branded_1707_SEA_PowerSoil__&kwid=%2Bpower%20%2Bsoil%20%2Brna	https://github.com/FranckLejzerowicz/protocols	TruSeq_Nano_PCR_free_Library_Preparation_Kit_single-end	uchime_4.2	TRUE	20	F1-O	15-B	GCGTGTCAAAGGGCACCACAAGAACGC	AGATGATGCCACCTATCACACAATCATG	FWD:_{AAGGGCACCACAAGAACGC}_REV:_{CCACCTATCACACAATCATG}	F1-O_15-B	GCGTGTCAAAGGGCACCACAAGAACGC_AGATGATGCCACCTATCACACAATCATG	AB02_37F_DNA_A_2_1	1515177	TruSeq	normalized	2016-05-20		Illumina	MiSeq	none	Lane_MiSeq_37F	40	112.19	4	46	initial_denaturation:95_5;_denaturation:_94_0.5;_annealing:52_0.2;_elongation:_72_1;_40_cycles;_final_elongation:72_2	11.1	3.6	39.96
37F.DNA.78.B	CCCGTGTT	CCCGTGTT	18S_rRNA	37F	37F	DNA	78	B	No	MIMARKS-survey	DSMP	gene|marine_metagenome|uncultured_microorganism|uncultured_organism|ecotype|biological_replicate|technical_replicate|interspecies_interaction_between_organisms	0	marine_abyssal_zone_biome	marine_oligotrophic_desert	mud	sediment	aerobe	https://www.qiagen.com/us/cmp/ecom/powersoilkits?COECM_MOBIO_Branded_1707_SEA_PowerSoil__&kwid=%2Bpower%20%2Bsoil%20%2Brna	https://github.com/FranckLejzerowicz/protocols	TruSeq_Nano_PCR_free_Library_Preparation_Kit_single-end	uchime_4.2	TRUE	20	F1-O	15-B	GCGTGTCAAAGGGCACCACAAGAACGC	AGATGATGCCACCTATCACACAATCATG	FWD:_{AAGGGCACCACAAGAACGC}_REV:_{CCACCTATCACACAATCATG}	F1-O_15-B	GCGTGTCAAAGGGCACCACAAGAACGC_AGATGATGCCACCTATCACACAATCATG	AB02_37F_DNA_B_2_1	1717014	TruSeq	normalized	2016-05-20		Illumina	MiSeq	none	Lane_MiSeq_37F	40	86.68	4	46	initial_denaturation:95_5;_denaturation:_94_0.5;_annealing:52_0.2;_elongation:_72_1;_40_cycles;_final_elongation:72_2	11.1	3.6	39.96
37F.DNA.82.A	CCCGTTCC	CCCGTTCC	18S_rRNA	37F	37F	DNA	82	A	No	MIMARKS-survey	DSMP	gene|marine_metagenome|uncultured_microorganism|uncultured_organism|ecotype|biological_replicate|technical_replicate|interspecies_interaction_between_organisms	0	marine_abyssal_zone_biome	marine_oligotrophic_desert	mud	sediment	aerobe	https://www.qiagen.com/us/cmp/ecom/powersoilkits?COECM_MOBIO_Branded_1707_SEA_PowerSoil__&kwid=%2Bpower%20%2Bsoil%20%2Brna	https://github.com/FranckLejzerowicz/protocols	TruSeq_Nano_PCR_free_Library_Preparation_Kit_single-end	uchime_4.2	TRUE	14.5	F1-O	15-I	GCGTGTCAAAGGGCACCACAAGAACGC	ATGTGCTCCCACCTATCACACAATCATG	FWD:_{AAGGGCACCACAAGAACGC}_REV:_{CCACCTATCACACAATCATG}	F1-O_15-I	GCGTGTCAAAGGGCACCACAAGAACGC_ATGTGCTCCCACCTATCACACAATCATG	AB02_37F_DNA_A_2_1	1515177	TruSeq	normalized	2016-05-20		Illumina	MiSeq	none	Lane_MiSeq_37F	40	112.19	4	46	initial_denaturation:95_5;_denaturation:_94_0.5;_annealing:52_0.2;_elongation:_72_1;_40_cycles;_final_elongation:72_2	9.76	4.1	40.02
37F.DNA.82.B	CCCGTTCG	CCCGTTCG	18S_rRNA	37F	37F	DNA	82	B	No	MIMARKS-survey	DSMP	gene|marine_metagenome|uncultured_microorganism|uncultured_organism|ecotype|biological_replicate|technical_replicate|interspecies_interaction_between_organisms	0	marine_abyssal_zone_biome	marine_oligotrophic_desert	mud	sediment	aerobe	https://www.qiagen.com/us/cmp/ecom/powersoilkits?COECM_MOBIO_Branded_1707_SEA_PowerSoil__&kwid=%2Bpower%20%2Bsoil%20%2Brna	https://github.com/FranckLejzerowicz/protocols	TruSeq_Nano_PCR_free_Library_Preparation_Kit_single-end	uchime_4.2	TRUE	14.5	F1-O	15-I	GCGTGTCAAAGGGCACCACAAGAACGC	ATGTGCTCCCACCTATCACACAATCATG	FWD:_{AAGGGCACCACAAGAACGC}_REV:_{CCACCTATCACACAATCATG}	F1-O_15-I	GCGTGTCAAAGGGCACCACAAGAACGC_ATGTGCTCCCACCTATCACACAATCATG	AB02_37F_DNA_B_2_1	1717014	TruSeq	normalized	2016-05-20		Illumina	MiSeq	none	Lane_MiSeq_37F	40	86.68	4	46	initial_denaturation:95_5;_denaturation:_94_0.5;_annealing:52_0.2;_elongation:_72_1;_40_cycles;_final_elongation:72_2	9.76	4.1	40.02
37F.DNA.83.A	CCCGTTCT	CCCGTTCT	18S_rRNA	37F	37F	DNA	83	A	No	MIMARKS-survey	DSMP	gene|marine_metagenome|uncultured_microorganism|uncultured_organism|ecotype|biological_replicate|technical_replicate|interspecies_interaction_between_organisms	0	marine_abyssal_zone_biome	marine_oligotrophic_desert	mud	sediment	aerobe	https://www.qiagen.com/us/cmp/ecom/powersoilkits?COECM_MOBIO_Branded_1707_SEA_PowerSoil__&kwid=%2Bpower%20%2Bsoil%20%2Brna	https://github.com/FranckLejzerowicz/protocols	TruSeq_Nano_PCR_free_Library_Preparation_Kit_single-end	uchime_4.2	TRUE	15.1	F1-O	15-U	GCGTGTCAAAGGGCACCACAAGAACGC	TATCGCTGCCACCTATCACACAATCATG	FWD:_{AAGGGCACCACAAGAACGC}_REV:_{CCACCTATCACACAATCATG}	F1-O_15-U	GCGTGTCAAAGGGCACCACAAGAACGC_TATCGCTGCCACCTATCACACAATCATG	AB02_37F_DNA_A_2_1	1515177	TruSeq	normalized	2016-05-20		Illumina	MiSeq	none	Lane_MiSeq_37F	40	112.19	4	46	initial_denaturation:95_5;_denaturation:_94_0.5;_annealing:52_0.2;_elongation:_72_1;_40_cycles;_final_elongation:72_2	10.2	3.92	39.98
37F.DNA.83.B	CCCGTTGC	CCCGTTGC	18S_rRNA	37F	37F	DNA	83	B	No	MIMARKS-survey	DSMP	gene|marine_metagenome|uncultured_microorganism|uncultured_organism|ecotype|biological_replicate|technical_replicate|interspecies_interaction_between_organisms	0	marine_abyssal_zone_biome	marine_oligotrophic_desert	mud	sediment	aerobe	https://www.qiagen.com/us/cmp/ecom/powersoilkits?COECM_MOBIO_Branded_1707_SEA_PowerSoil__&kwid=%2Bpower%20%2Bsoil%20%2Brna	https://github.com/FranckLejzerowicz/protocols	TruSeq_Nano_PCR_free_Library_Preparation_Kit_single-end	uchime_4.2	TRUE	15.1	F1-O	15-U	GCGTGTCAAAGGGCACCACAAGAACGC	TATCGCTGCCACCTATCACACAATCATG	FWD:_{AAGGGCACCACAAGAACGC}_REV:_{CCACCTATCACACAATCATG}	F1-O_15-U	GCGTGTCAAAGGGCACCACAAGAACGC_TATCGCTGCCACCTATCACACAATCATG	AB02_37F_DNA_B_2_1	1717014	TruSeq	normalized	2016-05-20		Illumina	MiSeq	none	Lane_MiSeq_37F	40	86.68	4	46	initial_denaturation:95_5;_denaturation:_94_0.5;_annealing:52_0.2;_elongation:_72_1;_40_cycles;_final_elongation:72_2	10.2	3.92	39.98
37F.DNA.84.A	CCCGTTGG	CCCGTTGG	18S_rRNA	37F	37F	DNA	84	A	No	MIMARKS-survey	DSMP	gene|marine_metagenome|uncultured_microorganism|uncultured_organism|ecotype|biological_replicate|technical_replicate|interspecies_interaction_between_organisms	0	marine_abyssal_zone_biome	marine_oligotrophic_desert	mud	sediment	aerobe	https://www.qiagen.com/us/cmp/ecom/powersoilkits?COECM_MOBIO_Branded_1707_SEA_PowerSoil__&kwid=%2Bpower%20%2Bsoil%20%2Brna	https://github.com/FranckLejzerowicz/protocols	TruSeq_Nano_PCR_free_Library_Preparation_Kit_single-end	uchime_4.2	TRUE	15.6	F1-P	15-M	TACTCGACAAGGGCACCACAAGAACGC	CGACGAGCCCACCTATCACACAATCATG	FWD:_{AAGGGCACCACAAGAACGC}_REV:_{CCACCTATCACACAATCATG}	F1-P_15-M	TACTCGACAAGGGCACCACAAGAACGC_CGACGAGCCCACCTATCACACAATCATG	AB02_37F_DNA_A_2_1	1515177	TruSeq	normalized	2016-05-20		Illumina	MiSeq	none	Lane_MiSeq_37F	40	112.19	4	46	initial_denaturation:95_5;_denaturation:_94_0.5;_annealing:52_0.2;_elongation:_72_1;_40_cycles;_final_elongation:72_2	12.5	3.2	40
37F.DNA.84.B	CCCGTTGT	CCCGTTGT	18S_rRNA	37F	37F	DNA	84	B	No	MIMARKS-survey	DSMP	gene|marine_metagenome|uncultured_microorganism|uncultured_organism|ecotype|biological_replicate|technical_replicate|interspecies_interaction_between_organisms	0	marine_abyssal_zone_biome	marine_oligotrophic_desert	mud	sediment	aerobe	https://www.qiagen.com/us/cmp/ecom/powersoilkits?COECM_MOBIO_Branded_1707_SEA_PowerSoil__&kwid=%2Bpower%20%2Bsoil%20%2Brna	https://github.com/FranckLejzerowicz/protocols	TruSeq_Nano_PCR_free_Library_Preparation_Kit_single-end	uchime_4.2	TRUE	15.6	F1-P	15-M	TACTCGACAAGGGCACCACAAGAACGC	CGACGAGCCCACCTATCACACAATCATG	FWD:_{AAGGGCACCACAAGAACGC}_REV:_{CCACCTATCACACAATCATG}	F1-P_15-M	TACTCGACAAGGGCACCACAAGAACGC_CGACGAGCCCACCTATCACACAATCATG	AB02_37F_DNA_B_2_1	1717014	TruSeq	normalized	2016-05-20		Illumina	MiSeq	none	Lane_MiSeq_37F	40	86.68	4	46	initial_denaturation:95_5;_denaturation:_94_0.5;_annealing:52_0.2;_elongation:_72_1;_40_cycles;_final_elongation:72_2	12.5	3.2	40
37F.DNA.85.A	CCCGTTTC	CCCGTTTC	18S_rRNA	37F	37F	DNA	85	A	No	MIMARKS-survey	DSMP	gene|marine_metagenome|uncultured_microorganism|uncultured_organism|ecotype|biological_replicate|technical_replicate|interspecies_interaction_between_organisms	0	marine_abyssal_zone_biome	marine_oligotrophic_desert	mud	sediment	aerobe	https://www.qiagen.com/us/cmp/ecom/powersoilkits?COECM_MOBIO_Branded_1707_SEA_PowerSoil__&kwid=%2Bpower%20%2Bsoil%20%2Brna	https://github.com/FranckLejzerowicz/protocols	TruSeq_Nano_PCR_free_Library_Preparation_Kit_single-end	uchime_4.2	TRUE	16.7	F1-P	15-T	TACTCGACAAGGGCACCACAAGAACGC	TAGTGAGCCCACCTATCACACAATCATG	FWD:_{AAGGGCACCACAAGAACGC}_REV:_{CCACCTATCACACAATCATG}	F1-P_15-T	TACTCGACAAGGGCACCACAAGAACGC_TAGTGAGCCCACCTATCACACAATCATG	AB02_37F_DNA_A_2_1	1515177	TruSeq	normalized	2016-05-20		Illumina	MiSeq	none	Lane_MiSeq_37F	40	112.19	4	46	initial_denaturation:95_5;_denaturation:_94_0.5;_annealing:52_0.2;_elongation:_72_1;_40_cycles;_final_elongation:72_2	10.1	3.96	40
37F.DNA.85.B	CCCGTTTG	CCCGTTTG	18S_rRNA	37F	37F	DNA	85	B	No	MIMARKS-survey	DSMP	gene|marine_metagenome|uncultured_microorganism|uncultured_organism|ecotype|biological_replicate|technical_replicate|interspecies_interaction_between_organisms	0	marine_abyssal_zone_biome	marine_oligotrophic_desert	mud	sediment	aerobe	https://www.qiagen.com/us/cmp/ecom/powersoilkits?COECM_MOBIO_Branded_1707_SEA_PowerSoil__&kwid=%2Bpower%20%2Bsoil%20%2Brna	https://github.com/FranckLejzerowicz/protocols	TruSeq_Nano_PCR_free_Library_Preparation_Kit_single-end	uchime_4.2	TRUE	16.7	F1-P	15-T	TACTCGACAAGGGCACCACAAGAACGC	TAGTGAGCCCACCTATCACACAATCATG	FWD:_{AAGGGCACCACAAGAACGC}_REV:_{CCACCTATCACACAATCATG}	F1-P_15-T	TACTCGACAAGGGCACCACAAGAACGC_TAGTGAGCCCACCTATCACACAATCATG	AB02_37F_DNA_B_2_1	1717014	TruSeq	normalized	2016-05-20		Illumina	MiSeq	none	Lane_MiSeq_37F	40	86.68	4	46	initial_denaturation:95_5;_denaturation:_94_0.5;_annealing:52_0.2;_elongation:_72_1;_40_cycles;_final_elongation:72_2	10.1	3.96	40
37F.DNA.86.A	CCCGTTTT	CCCGTTTT	18S_rRNA	37F	37F	DNA	86	A	No	MIMARKS-survey	DSMP	gene|marine_metagenome|uncultured_microorganism|uncultured_organism|ecotype|biological_replicate|technical_replicate|interspecies_interaction_between_organisms	0	marine_abyssal_zone_biome	marine_oligotrophic_desert	mud	sediment	aerobe	https://www.qiagen.com/us/cmp/ecom/powersoilkits?COECM_MOBIO_Branded_1707_SEA_PowerSoil__&kwid=%2Bpower%20%2Bsoil%20%2Brna	https://github.com/FranckLejzerowicz/protocols	TruSeq_Nano_PCR_free_Library_Preparation_Kit_single-end	uchime_4.2	TRUE	18.3	F1-P	15-V	TACTCGACAAGGGCACCACAAGAACGC	TATGACATCCACCTATCACACAATCATG	FWD:_{AAGGGCACCACAAGAACGC}_REV:_{CCACCTATCACACAATCATG}	F1-P_15-V	TACTCGACAAGGGCACCACAAGAACGC_TATGACATCCACCTATCACACAATCATG	AB02_37F_DNA_A_2_1	1515177	TruSeq	normalized	2016-05-20		Illumina	MiSeq	none	Lane_MiSeq_37F	40	112.19	4	46	initial_denaturation:95_5;_denaturation:_94_0.5;_annealing:52_0.2;_elongation:_72_1;_40_cycles;_final_elongation:72_2	7.23	5.53	39.98
37F.DNA.86.B	CCCTCCCC	CCCTCCCC	18S_rRNA	37F	37F	DNA	86	B	No	MIMARKS-survey	DSMP	gene|marine_metagenome|uncultured_microorganism|uncultured_organism|ecotype|biological_replicate|technical_replicate|interspecies_interaction_between_organisms	0	marine_abyssal_zone_biome	marine_oligotrophic_desert	mud	sediment	aerobe	https://www.qiagen.com/us/cmp/ecom/powersoilkits?COECM_MOBIO_Branded_1707_SEA_PowerSoil__&kwid=%2Bpower%20%2Bsoil%20%2Brna	https://github.com/FranckLejzerowicz/protocols	TruSeq_Nano_PCR_free_Library_Preparation_Kit_single-end	uchime_4.2	TRUE	18.3	F1-P	15-V	TACTCGACAAGGGCACCACAAGAACGC	TATGACATCCACCTATCACACAATCATG	FWD:_{AAGGGCACCACAAGAACGC}_REV:_{CCACCTATCACACAATCATG}	F1-P_15-V	TACTCGACAAGGGCACCACAAGAACGC_TATGACATCCACCTATCACACAATCATG	AB02_37F_DNA_B_2_1	1717014	TruSeq	normalized	2016-05-20		Illumina	MiSeq	none	Lane_MiSeq_37F	40	86.68	4	46	initial_denaturation:95_5;_denaturation:_94_0.5;_annealing:52_0.2;_elongation:_72_1;_40_cycles;_final_elongation:72_2	7.23	5.53	39.98
37F.DNA.87.A	CCCTCCCG	CCCTCCCG	18S_rRNA	37F	37F	DNA	87	A	No	MIMARKS-survey	DSMP	gene|marine_metagenome|uncultured_microorganism|uncultured_organism|ecotype|biological_replicate|technical_replicate|interspecies_interaction_between_organisms	0	marine_abyssal_zone_biome	marine_oligotrophic_desert	mud	sediment	aerobe	https://www.qiagen.com/us/cmp/ecom/powersoilkits?COECM_MOBIO_Branded_1707_SEA_PowerSoil__&kwid=%2Bpower%20%2Bsoil%20%2Brna	https://github.com/FranckLejzerowicz/protocols	TruSeq_Nano_PCR_free_Library_Preparation_Kit_single-end	uchime_4.2	TRUE	14	F1-P	15-Z	TACTCGACAAGGGCACCACAAGAACGC	TGTGCATGCCACCTATCACACAATCATG	FWD:_{AAGGGCACCACAAGAACGC}_REV:_{CCACCTATCACACAATCATG}	F1-P_15-Z	TACTCGACAAGGGCACCACAAGAACGC_TGTGCATGCCACCTATCACACAATCATG	AB02_37F_DNA_A_2_1	1515177	TruSeq	normalized	2016-05-20		Illumina	MiSeq	none	Lane_MiSeq_37F	40	112.19	4	46	initial_denaturation:95_5;_denaturation:_94_0.5;_annealing:52_0.2;_elongation:_72_1;_40_cycles;_final_elongation:72_2	9.47	4.22	39.96
37F.DNA.87.B	CCCTCCCT	CCCTCCCT	18S_rRNA	37F	37F	DNA	87	B	No	MIMARKS-survey	DSMP	gene|marine_metagenome|uncultured_microorganism|uncultured_organism|ecotype|biological_replicate|technical_replicate|interspecies_interaction_between_organisms	0	marine_abyssal_zone_biome	marine_oligotrophic_desert	mud	sediment	aerobe	https://www.qiagen.com/us/cmp/ecom/powersoilkits?COECM_MOBIO_Branded_1707_SEA_PowerSoil__&kwid=%2Bpower%20%2Bsoil%20%2Brna	https://github.com/FranckLejzerowicz/protocols	TruSeq_Nano_PCR_free_Library_Preparation_Kit_single-end	uchime_4.2	TRUE	14	F1-P	15-Z	TACTCGACAAGGGCACCACAAGAACGC	TGTGCATGCCACCTATCACACAATCATG	FWD:_{AAGGGCACCACAAGAACGC}_REV:_{CCACCTATCACACAATCATG}	F1-P_15-Z	TACTCGACAAGGGCACCACAAGAACGC_TGTGCATGCCACCTATCACACAATCATG	AB02_37F_DNA_B_2_1	1717014	TruSeq	normalized	2016-05-20		Illumina	MiSeq	none	Lane_MiSeq_37F	40	86.68	4	46	initial_denaturation:95_5;_denaturation:_94_0.5;_annealing:52_0.2;_elongation:_72_1;_40_cycles;_final_elongation:72_2	9.47	4.22	39.96
37F.DNA.94.A	CCCTCCGC	CCCTCCGC	18S_rRNA	37F	37F	DNA	94	A	No	MIMARKS-survey	DSMP	gene|marine_metagenome|uncultured_microorganism|uncultured_organism|ecotype|biological_replicate|technical_replicate|interspecies_interaction_between_organisms	0	marine_abyssal_zone_biome	marine_oligotrophic_desert	mud	sediment	aerobe	https://www.qiagen.com/us/cmp/ecom/powersoilkits?COECM_MOBIO_Branded_1707_SEA_PowerSoil__&kwid=%2Bpower%20%2Bsoil%20%2Brna	https://github.com/FranckLejzerowicz/protocols	TruSeq_Nano_PCR_free_Library_Preparation_Kit_single-end	uchime_4.2	TRUE	12.2	F1-Q	15-D	TAGATGCAAAGGGCACCACAAGAACGC	AGTGCTGCCCACCTATCACACAATCATG	FWD:_{AAGGGCACCACAAGAACGC}_REV:_{CCACCTATCACACAATCATG}	F1-Q_15-D	TAGATGCAAAGGGCACCACAAGAACGC_AGTGCTGCCCACCTATCACACAATCATG	AB02_37F_DNA_A_2_1	1515177	TruSeq	normalized	2016-05-20		Illumina	MiSeq	none	Lane_MiSeq_37F	40	112.19	4	46	initial_denaturation:95_5;_denaturation:_94_0.5;_annealing:52_0.2;_elongation:_72_1;_40_cycles;_final_elongation:72_2	14.5	2.76	40.02
37F.DNA.94.B	CCCTCCGG	CCCTCCGG	18S_rRNA	37F	37F	DNA	94	B	No	MIMARKS-survey	DSMP	gene|marine_metagenome|uncultured_microorganism|uncultured_organism|ecotype|biological_replicate|technical_replicate|interspecies_interaction_between_organisms	0	marine_abyssal_zone_biome	marine_oligotrophic_desert	mud	sediment	aerobe	https://www.qiagen.com/us/cmp/ecom/powersoilkits?COECM_MOBIO_Branded_1707_SEA_PowerSoil__&kwid=%2Bpower%20%2Bsoil%20%2Brna	https://github.com/FranckLejzerowicz/protocols	TruSeq_Nano_PCR_free_Library_Preparation_Kit_single-end	uchime_4.2	TRUE	12.2	F1-Q	15-D	TAGATGCAAAGGGCACCACAAGAACGC	AGTGCTGCCCACCTATCACACAATCATG	FWD:_{AAGGGCACCACAAGAACGC}_REV:_{CCACCTATCACACAATCATG}	F1-Q_15-D	TAGATGCAAAGGGCACCACAAGAACGC_AGTGCTGCCCACCTATCACACAATCATG	AB02_37F_DNA_B_2_1	1717014	TruSeq	normalized	2016-05-20		Illumina	MiSeq	none	Lane_MiSeq_37F	40	86.68	4	46	initial_denaturation:95_5;_denaturation:_94_0.5;_annealing:52_0.2;_elongation:_72_1;_40_cycles;_final_elongation:72_2	14.5	2.76	40.02
37F.DNA.95.A	CCCTCCGT	CCCTCCGT	18S_rRNA	37F	37F	DNA	95	A	No	MIMARKS-survey	DSMP	gene|marine_metagenome|uncultured_microorganism|uncultured_organism|ecotype|biological_replicate|technical_replicate|interspecies_interaction_between_organisms	0	marine_abyssal_zone_biome	marine_oligotrophic_desert	mud	sediment	aerobe	https://www.qiagen.com/us/cmp/ecom/powersoilkits?COECM_MOBIO_Branded_1707_SEA_PowerSoil__&kwid=%2Bpower%20%2Bsoil%20%2Brna	https://github.com/FranckLejzerowicz/protocols	TruSeq_Nano_PCR_free_Library_Preparation_Kit_single-end	uchime_4.2	TRUE	13.6	F1-Q	15-N	TAGATGCAAAGGGCACCACAAGAACGC	CGAGACGTCCACCTATCACACAATCATG	FWD:_{AAGGGCACCACAAGAACGC}_REV:_{CCACCTATCACACAATCATG}	F1-Q_15-N	TAGATGCAAAGGGCACCACAAGAACGC_CGAGACGTCCACCTATCACACAATCATG	AB02_37F_DNA_A_2_1	1515177	TruSeq	normalized	2016-05-20		Illumina	MiSeq	none	Lane_MiSeq_37F	40	112.19	4	46	initial_denaturation:95_5;_denaturation:_94_0.5;_annealing:52_0.2;_elongation:_72_1;_40_cycles;_final_elongation:72_2	13.2	3.03	40
37F.DNA.95.B	CCCTCCTC	CCCTCCTC	18S_rRNA	37F	37F	DNA	95	B	No	MIMARKS-survey	DSMP	gene|marine_metagenome|uncultured_microorganism|uncultured_organism|ecotype|biological_replicate|technical_replicate|interspecies_interaction_between_organisms	0	marine_abyssal_zone_biome	marine_oligotrophic_desert	mud	sediment	aerobe	https://www.qiagen.com/us/cmp/ecom/powersoilkits?COECM_MOBIO_Branded_1707_SEA_PowerSoil__&kwid=%2Bpower%20%2Bsoil%20%2Brna	https://github.com/FranckLejzerowicz/protocols	TruSeq_Nano_PCR_free_Library_Preparation_Kit_single-end	uchime_4.2	TRUE	13.6	F1-Q	15-N	TAGATGCAAAGGGCACCACAAGAACGC	CGAGACGTCCACCTATCACACAATCATG	FWD:_{AAGGGCACCACAAGAACGC}_REV:_{CCACCTATCACACAATCATG}	F1-Q_15-N	TAGATGCAAAGGGCACCACAAGAACGC_CGAGACGTCCACCTATCACACAATCATG	AB02_37F_DNA_B_2_1	1717014	TruSeq	normalized	2016-05-20		Illumina	MiSeq	none	Lane_MiSeq_37F	40	86.68	4	46	initial_denaturation:95_5;_denaturation:_94_0.5;_annealing:52_0.2;_elongation:_72_1;_40_cycles;_final_elongation:72_2	13.2	3.03	40
37F.DNA.97.A	CCCTCCTG	CCCTCCTG	18S_rRNA	37F	37F	DNA	97	A	No	MIMARKS-survey	DSMP	gene|marine_metagenome|uncultured_microorganism|uncultured_organism|ecotype|biological_replicate|technical_replicate|interspecies_interaction_between_organisms	0	marine_abyssal_zone_biome	marine_oligotrophic_desert	mud	sediment	aerobe	https://www.qiagen.com/us/cmp/ecom/powersoilkits?COECM_MOBIO_Branded_1707_SEA_PowerSoil__&kwid=%2Bpower%20%2Bsoil%20%2Brna	https://github.com/FranckLejzerowicz/protocols	TruSeq_Nano_PCR_free_Library_Preparation_Kit_single-end	uchime_4.2	TRUE	16.7	F1-Q	15-X	TAGATGCAAAGGGCACCACAAGAACGC	TGATGCATCCACCTATCACACAATCATG	FWD:_{AAGGGCACCACAAGAACGC}_REV:_{CCACCTATCACACAATCATG}	F1-Q_15-X	TAGATGCAAAGGGCACCACAAGAACGC_TGATGCATCCACCTATCACACAATCATG	AB02_37F_DNA_A_2_1	1515177	TruSeq	normalized	2016-05-20		Illumina	MiSeq	none	Lane_MiSeq_37F	40	112.19	4	46	initial_denaturation:95_5;_denaturation:_94_0.5;_annealing:52_0.2;_elongation:_72_1;_40_cycles;_final_elongation:72_2	10.7	3.74	40.02
37F.DNA.97.B	CCCTCCTT	CCCTCCTT	18S_rRNA	37F	37F	DNA	97	B	No	MIMARKS-survey	DSMP	gene|marine_metagenome|uncultured_microorganism|uncultured_organism|ecotype|biological_replicate|technical_replicate|interspecies_interaction_between_organisms	0	marine_abyssal_zone_biome	marine_oligotrophic_desert	mud	sediment	aerobe	https://www.qiagen.com/us/cmp/ecom/powersoilkits?COECM_MOBIO_Branded_1707_SEA_PowerSoil__&kwid=%2Bpower%20%2Bsoil%20%2Brna	https://github.com/FranckLejzerowicz/protocols	TruSeq_Nano_PCR_free_Library_Preparation_Kit_single-end	uchime_4.2	TRUE	16.7	F1-Q	15-X	TAGATGCAAAGGGCACCACAAGAACGC	TGATGCATCCACCTATCACACAATCATG	FWD:_{AAGGGCACCACAAGAACGC}_REV:_{CCACCTATCACACAATCATG}	F1-Q_15-X	TAGATGCAAAGGGCACCACAAGAACGC_TGATGCATCCACCTATCACACAATCATG	AB02_37F_DNA_B_2_1	1717014	TruSeq	normalized	2016-05-20		Illumina	MiSeq	none	Lane_MiSeq_37F	40	86.68	4	46	initial_denaturation:95_5;_denaturation:_94_0.5;_annealing:52_0.2;_elongation:_72_1;_40_cycles;_final_elongation:72_2	10.7	3.74	40.02
37F.DNA.98.A	CCCTCGCC	CCCTCGCC	18S_rRNA	37F	37F	DNA	98	A	No	MIMARKS-survey	DSMP	gene|marine_metagenome|uncultured_microorganism|uncultured_organism|ecotype|biological_replicate|technical_replicate|interspecies_interaction_between_organisms	0	marine_abyssal_zone_biome	marine_oligotrophic_desert	mud	sediment	aerobe	https://www.qiagen.com/us/cmp/ecom/powersoilkits?COECM_MOBIO_Branded_1707_SEA_PowerSoil__&kwid=%2Bpower%20%2Bsoil%20%2Brna	https://github.com/FranckLejzerowicz/protocols	TruSeq_Nano_PCR_free_Library_Preparation_Kit_single-end	uchime_4.2	TRUE	18	F1-R	15-J	TAGCTATCAAGGGCACCACAAGAACGC	CAGTGCAGCCACCTATCACACAATCATG	FWD:_{AAGGGCACCACAAGAACGC}_REV:_{CCACCTATCACACAATCATG}	F1-R_15-J	TAGCTATCAAGGGCACCACAAGAACGC_CAGTGCAGCCACCTATCACACAATCATG	AB02_37F_DNA_A_2_1	1515177	TruSeq	normalized	2016-05-20		Illumina	MiSeq	none	Lane_MiSeq_37F	40	112.19	4	46	initial_denaturation:95_5;_denaturation:_94_0.5;_annealing:52_0.2;_elongation:_72_1;_40_cycles;_final_elongation:72_2	17.3	2.31	39.96
37F.DNA.98.B	CCCTCGCG	CCCTCGCG	18S_rRNA	37F	37F	DNA	98	B	No	MIMARKS-survey	DSMP	gene|marine_metagenome|uncultured_microorganism|uncultured_organism|ecotype|biological_replicate|technical_replicate|interspecies_interaction_between_organisms	0	marine_abyssal_zone_biome	marine_oligotrophic_desert	mud	sediment	aerobe	https://www.qiagen.com/us/cmp/ecom/powersoilkits?COECM_MOBIO_Branded_1707_SEA_PowerSoil__&kwid=%2Bpower%20%2Bsoil%20%2Brna	https://github.com/FranckLejzerowicz/protocols	TruSeq_Nano_PCR_free_Library_Preparation_Kit_single-end	uchime_4.2	TRUE	18	F1-R	15-J	TAGCTATCAAGGGCACCACAAGAACGC	CAGTGCAGCCACCTATCACACAATCATG	FWD:_{AAGGGCACCACAAGAACGC}_REV:_{CCACCTATCACACAATCATG}	F1-R_15-J	TAGCTATCAAGGGCACCACAAGAACGC_CAGTGCAGCCACCTATCACACAATCATG	AB02_37F_DNA_B_2_1	1717014	TruSeq	normalized	2016-05-20		Illumina	MiSeq	none	Lane_MiSeq_37F	40	86.68	4	46	initial_denaturation:95_5;_denaturation:_94_0.5;_annealing:52_0.2;_elongation:_72_1;_40_cycles;_final_elongation:72_2	17.3	2.31	39.96
37F.DNA.99.A	CCCTCGCT	CCCTCGCT	18S_rRNA	37F	37F	DNA	99	A	No	MIMARKS-survey	DSMP	gene|marine_metagenome|uncultured_microorganism|uncultured_organism|ecotype|biological_replicate|technical_replicate|interspecies_interaction_between_organisms	0	marine_abyssal_zone_biome	marine_oligotrophic_desert	mud	sediment	aerobe	https://www.qiagen.com/us/cmp/ecom/powersoilkits?COECM_MOBIO_Branded_1707_SEA_PowerSoil__&kwid=%2Bpower%20%2Bsoil%20%2Brna	https://github.com/FranckLejzerowicz/protocols	TruSeq_Nano_PCR_free_Library_Preparation_Kit_single-end	uchime_4.2	TRUE	17	F1-R	15-O	TAGCTATCAAGGGCACCACAAGAACGC	CGAGCTAGCCACCTATCACACAATCATG	FWD:_{AAGGGCACCACAAGAACGC}_REV:_{CCACCTATCACACAATCATG}	F1-R_15-O	TAGCTATCAAGGGCACCACAAGAACGC_CGAGCTAGCCACCTATCACACAATCATG	AB02_37F_DNA_A_2_1	1515177	TruSeq	normalized	2016-05-20		Illumina	MiSeq	none	Lane_MiSeq_37F	40	112.19	4	46	initial_denaturation:95_5;_denaturation:_94_0.5;_annealing:52_0.2;_elongation:_72_1;_40_cycles;_final_elongation:72_2	10.8	3.7	39.96
37F.DNA.99.B	CCCTCGGC	CCCTCGGC	18S_rRNA	37F	37F	DNA	99	B	No	MIMARKS-survey	DSMP	gene|marine_metagenome|uncultured_microorganism|uncultured_organism|ecotype|biological_replicate|technical_replicate|interspecies_interaction_between_organisms	0	marine_abyssal_zone_biome	marine_oligotrophic_desert	mud	sediment	aerobe	https://www.qiagen.com/us/cmp/ecom/powersoilkits?COECM_MOBIO_Branded_1707_SEA_PowerSoil__&kwid=%2Bpower%20%2Bsoil%20%2Brna	https://github.com/FranckLejzerowicz/protocols	TruSeq_Nano_PCR_free_Library_Preparation_Kit_single-end	uchime_4.2	TRUE	17	F1-R	15-O	TAGCTATCAAGGGCACCACAAGAACGC	CGAGCTAGCCACCTATCACACAATCATG	FWD:_{AAGGGCACCACAAGAACGC}_REV:_{CCACCTATCACACAATCATG}	F1-R_15-O	TAGCTATCAAGGGCACCACAAGAACGC_CGAGCTAGCCACCTATCACACAATCATG	AB02_37F_DNA_B_2_1	1717014	TruSeq	normalized	2016-05-20		Illumina	MiSeq	none	Lane_MiSeq_37F	40	86.68	4	46	initial_denaturation:95_5;_denaturation:_94_0.5;_annealing:52_0.2;_elongation:_72_1;_40_cycles;_final_elongation:72_2	10.8	3.7	39.96
37F.DNA.100.A	CCCTCGGG	CCCTCGGG	18S_rRNA	37F	37F	DNA	100	A	No	MIMARKS-survey	DSMP	gene|marine_metagenome|uncultured_microorganism|uncultured_organism|ecotype|biological_replicate|technical_replicate|interspecies_interaction_between_organisms	0	marine_abyssal_zone_biome	marine_oligotrophic_desert	mud	sediment	aerobe	https://www.qiagen.com/us/cmp/ecom/powersoilkits?COECM_MOBIO_Branded_1707_SEA_PowerSoil__&kwid=%2Bpower%20%2Bsoil%20%2Brna	https://github.com/FranckLejzerowicz/protocols	TruSeq_Nano_PCR_free_Library_Preparation_Kit_single-end	uchime_4.2	TRUE	17.7	F1-R	15-T	TAGCTATCAAGGGCACCACAAGAACGC	TAGTGAGCCCACCTATCACACAATCATG	FWD:_{AAGGGCACCACAAGAACGC}_REV:_{CCACCTATCACACAATCATG}	F1-R_15-T	TAGCTATCAAGGGCACCACAAGAACGC_TAGTGAGCCCACCTATCACACAATCATG	AB02_37F_DNA_A_2_1	1515177	TruSeq	normalized	2016-05-20		Illumina	MiSeq	none	Lane_MiSeq_37F	40	112.19	4	46	initial_denaturation:95_5;_denaturation:_94_0.5;_annealing:52_0.2;_elongation:_72_1;_40_cycles;_final_elongation:72_2	10.3	3.88	39.96
37F.DNA.100.B	CCCTCGGT	CCCTCGGT	18S_rRNA	37F	37F	DNA	100	B	No	MIMARKS-survey	DSMP	gene|marine_metagenome|uncultured_microorganism|uncultured_organism|ecotype|biological_replicate|technical_replicate|interspecies_interaction_between_organisms	0	marine_abyssal_zone_biome	marine_oligotrophic_desert	mud	sediment	aerobe	https://www.qiagen.com/us/cmp/ecom/powersoilkits?COECM_MOBIO_Branded_1707_SEA_PowerSoil__&kwid=%2Bpower%20%2Bsoil%20%2Brna	https://github.com/FranckLejzerowicz/protocols	TruSeq_Nano_PCR_free_Library_Preparation_Kit_single-end	uchime_4.2	TRUE	17.7	F1-R	15-T	TAGCTATCAAGGGCACCACAAGAACGC	TAGTGAGCCCACCTATCACACAATCATG	FWD:_{AAGGGCACCACAAGAACGC}_REV:_{CCACCTATCACACAATCATG}	F1-R_15-T	TAGCTATCAAGGGCACCACAAGAACGC_TAGTGAGCCCACCTATCACACAATCATG	AB02_37F_DNA_B_2_1	1717014	TruSeq	normalized	2016-05-20		Illumina	MiSeq	none	Lane_MiSeq_37F	40	86.68	4	46	initial_denaturation:95_5;_denaturation:_94_0.5;_annealing:52_0.2;_elongation:_72_1;_40_cycles;_final_elongation:72_2	10.3	3.88	39.96
37F.DNA.101.A	CCCTCGTC	CCCTCGTC	18S_rRNA	37F	37F	DNA	101	A	No	MIMARKS-survey	DSMP	gene|marine_metagenome|uncultured_microorganism|uncultured_organism|ecotype|biological_replicate|technical_replicate|interspecies_interaction_between_organisms	0	marine_abyssal_zone_biome	marine_oligotrophic_desert	mud	sediment	aerobe	https://www.qiagen.com/us/cmp/ecom/powersoilkits?COECM_MOBIO_Branded_1707_SEA_PowerSoil__&kwid=%2Bpower%20%2Bsoil%20%2Brna	https://github.com/FranckLejzerowicz/protocols	TruSeq_Nano_PCR_free_Library_Preparation_Kit_single-end	uchime_4.2	TRUE	18.3	F1-S	15-B	TAGTGACTAAGGGCACCACAAGAACGC	AGATGATGCCACCTATCACACAATCATG	FWD:_{AAGGGCACCACAAGAACGC}_REV:_{CCACCTATCACACAATCATG}	F1-S_15-B	TAGTGACTAAGGGCACCACAAGAACGC_AGATGATGCCACCTATCACACAATCATG	AB02_37F_DNA_A_2_1	1515177	TruSeq	normalized	2016-05-20		Illumina	MiSeq	none	Lane_MiSeq_37F	40	112.19	4	46	initial_denaturation:95_5;_denaturation:_94_0.5;_annealing:52_0.2;_elongation:_72_1;_40_cycles;_final_elongation:72_2	9.6	4.17	40.03
37F.DNA.101.B	CCCTCGTG	CCCTCGTG	18S_rRNA	37F	37F	DNA	101	B	No	MIMARKS-survey	DSMP	gene|marine_metagenome|uncultured_microorganism|uncultured_organism|ecotype|biological_replicate|technical_replicate|interspecies_interaction_between_organisms	0	marine_abyssal_zone_biome	marine_oligotrophic_desert	mud	sediment	aerobe	https://www.qiagen.com/us/cmp/ecom/powersoilkits?COECM_MOBIO_Branded_1707_SEA_PowerSoil__&kwid=%2Bpower%20%2Bsoil%20%2Brna	https://github.com/FranckLejzerowicz/protocols	TruSeq_Nano_PCR_free_Library_Preparation_Kit_single-end	uchime_4.2	TRUE	18.3	F1-S	15-B	TAGTGACTAAGGGCACCACAAGAACGC	AGATGATGCCACCTATCACACAATCATG	FWD:_{AAGGGCACCACAAGAACGC}_REV:_{CCACCTATCACACAATCATG}	F1-S_15-B	TAGTGACTAAGGGCACCACAAGAACGC_AGATGATGCCACCTATCACACAATCATG	AB02_37F_DNA_B_2_1	1717014	TruSeq	normalized	2016-05-20		Illumina	MiSeq	none	Lane_MiSeq_37F	40	86.68	4	46	initial_denaturation:95_5;_denaturation:_94_0.5;_annealing:52_0.2;_elongation:_72_1;_40_cycles;_final_elongation:72_2	9.6	4.17	40.03
37F.DNA.102.A	CCCTCGTT	CCCTCGTT	18S_rRNA	37F	37F	DNA	102	A	No	MIMARKS-survey	DSMP	gene|marine_metagenome|uncultured_microorganism|uncultured_organism|ecotype|biological_replicate|technical_replicate|interspecies_interaction_between_organisms	0	marine_abyssal_zone_biome	marine_oligotrophic_desert	mud	sediment	aerobe	https://www.qiagen.com/us/cmp/ecom/powersoilkits?COECM_MOBIO_Branded_1707_SEA_PowerSoil__&kwid=%2Bpower%20%2Bsoil%20%2Brna	https://github.com/FranckLejzerowicz/protocols	TruSeq_Nano_PCR_free_Library_Preparation_Kit_single-end	uchime_4.2	TRUE	18.7	F1-S	15-H	TAGTGACTAAGGGCACCACAAGAACGC	ATGTCAGTCCACCTATCACACAATCATG	FWD:_{AAGGGCACCACAAGAACGC}_REV:_{CCACCTATCACACAATCATG}	F1-S_15-H	TAGTGACTAAGGGCACCACAAGAACGC_ATGTCAGTCCACCTATCACACAATCATG	AB02_37F_DNA_A_2_1	1515177	TruSeq	normalized	2016-05-20		Illumina	MiSeq	none	Lane_MiSeq_37F	40	112.19	4	46	initial_denaturation:95_5;_denaturation:_94_0.5;_annealing:52_0.2;_elongation:_72_1;_40_cycles;_final_elongation:72_2	9.36	4.27	39.97
37F.DNA.102.B	CCCTCTCC	CCCTCTCC	18S_rRNA	37F	37F	DNA	102	B	No	MIMARKS-survey	DSMP	gene|marine_metagenome|uncultured_microorganism|uncultured_organism|ecotype|biological_replicate|technical_replicate|interspecies_interaction_between_organisms	0	marine_abyssal_zone_biome	marine_oligotrophic_desert	mud	sediment	aerobe	https://www.qiagen.com/us/cmp/ecom/powersoilkits?COECM_MOBIO_Branded_1707_SEA_PowerSoil__&kwid=%2Bpower%20%2Bsoil%20%2Brna	https://github.com/FranckLejzerowicz/protocols	TruSeq_Nano_PCR_free_Library_Preparation_Kit_single-end	uchime_4.2	TRUE	18.7	F1-S	15-H	TAGTGACTAAGGGCACCACAAGAACGC	ATGTCAGTCCACCTATCACACAATCATG	FWD:_{AAGGGCACCACAAGAACGC}_REV:_{CCACCTATCACACAATCATG}	F1-S_15-H	TAGTGACTAAGGGCACCACAAGAACGC_ATGTCAGTCCACCTATCACACAATCATG	AB02_37F_DNA_B_2_1	1717014	TruSeq	normalized	2016-05-20		Illumina	MiSeq	none	Lane_MiSeq_37F	40	86.68	4	46	initial_denaturation:95_5;_denaturation:_94_0.5;_annealing:52_0.2;_elongation:_72_1;_40_cycles;_final_elongation:72_2	9.36	4.27	39.97
37F.DNA.103.A	CCCTCTCG	CCCTCTCG	18S_rRNA	37F	37F	DNA	103	A	No	MIMARKS-survey	DSMP	gene|marine_metagenome|uncultured_microorganism|uncultured_organism|ecotype|biological_replicate|technical_replicate|interspecies_interaction_between_organisms	0	marine_abyssal_zone_biome	marine_oligotrophic_desert	mud	sediment	aerobe	https://www.qiagen.com/us/cmp/ecom/powersoilkits?COECM_MOBIO_Branded_1707_SEA_PowerSoil__&kwid=%2Bpower%20%2Bsoil%20%2Brna	https://github.com/FranckLejzerowicz/protocols	TruSeq_Nano_PCR_free_Library_Preparation_Kit_single-end	uchime_4.2	TRUE	17.7	F1-S	15-R	TAGTGACTAAGGGCACCACAAGAACGC	CTGTATATCCACCTATCACACAATCATG	FWD:_{AAGGGCACCACAAGAACGC}_REV:_{CCACCTATCACACAATCATG}	F1-S_15-R	TAGTGACTAAGGGCACCACAAGAACGC_CTGTATATCCACCTATCACACAATCATG	AB02_37F_DNA_A_2_1	1515177	TruSeq	normalized	2016-05-20		Illumina	MiSeq	none	Lane_MiSeq_37F	40	112.19	4	46	initial_denaturation:95_5;_denaturation:_94_0.5;_annealing:52_0.2;_elongation:_72_1;_40_cycles;_final_elongation:72_2	7.11	5.63	40.03
37F.DNA.103.B	CCCTCTCT	CCCTCTCT	18S_rRNA	37F	37F	DNA	103	B	No	MIMARKS-survey	DSMP	gene|marine_metagenome|uncultured_microorganism|uncultured_organism|ecotype|biological_replicate|technical_replicate|interspecies_interaction_between_organisms	0	marine_abyssal_zone_biome	marine_oligotrophic_desert	mud	sediment	aerobe	https://www.qiagen.com/us/cmp/ecom/powersoilkits?COECM_MOBIO_Branded_1707_SEA_PowerSoil__&kwid=%2Bpower%20%2Bsoil%20%2Brna	https://github.com/FranckLejzerowicz/protocols	TruSeq_Nano_PCR_free_Library_Preparation_Kit_single-end	uchime_4.2	TRUE	17.7	F1-S	15-R	TAGTGACTAAGGGCACCACAAGAACGC	CTGTATATCCACCTATCACACAATCATG	FWD:_{AAGGGCACCACAAGAACGC}_REV:_{CCACCTATCACACAATCATG}	F1-S_15-R	TAGTGACTAAGGGCACCACAAGAACGC_CTGTATATCCACCTATCACACAATCATG	AB02_37F_DNA_B_2_1	1717014	TruSeq	normalized	2016-05-20		Illumina	MiSeq	none	Lane_MiSeq_37F	40	86.68	4	46	initial_denaturation:95_5;_denaturation:_94_0.5;_annealing:52_0.2;_elongation:_72_1;_40_cycles;_final_elongation:72_2	7.11	5.63	40.03
37F.DNA.104.A	CCCTCTGC	CCCTCTGC	18S_rRNA	37F	37F	DNA	104	A	No	MIMARKS-survey	DSMP	gene|marine_metagenome|uncultured_microorganism|uncultured_organism|ecotype|biological_replicate|technical_replicate|interspecies_interaction_between_organisms	0	marine_abyssal_zone_biome	marine_oligotrophic_desert	mud	sediment	aerobe	https://www.qiagen.com/us/cmp/ecom/powersoilkits?COECM_MOBIO_Branded_1707_SEA_PowerSoil__&kwid=%2Bpower%20%2Bsoil%20%2Brna	https://github.com/FranckLejzerowicz/protocols	TruSeq_Nano_PCR_free_Library_Preparation_Kit_single-end	uchime_4.2	TRUE	17.3	F1-S	15-Y	TAGTGACTAAGGGCACCACAAGAACGC	TGTCATAGCCACCTATCACACAATCATG	FWD:_{AAGGGCACCACAAGAACGC}_REV:_{CCACCTATCACACAATCATG}	F1-S_15-Y	TAGTGACTAAGGGCACCACAAGAACGC_TGTCATAGCCACCTATCACACAATCATG	AB02_37F_DNA_A_2_1	1515177	TruSeq	normalized	2016-05-20		Illumina	MiSeq	none	Lane_MiSeq_37F	40	112.19	4	46	initial_denaturation:95_5;_denaturation:_94_0.5;_annealing:52_0.2;_elongation:_72_1;_40_cycles;_final_elongation:72_2	7	5.71	39.97
37F.DNA.104.B	CCCTCTGG	CCCTCTGG	18S_rRNA	37F	37F	DNA	104	B	No	MIMARKS-survey	DSMP	gene|marine_metagenome|uncultured_microorganism|uncultured_organism|ecotype|biological_replicate|technical_replicate|interspecies_interaction_between_organisms	0	marine_abyssal_zone_biome	marine_oligotrophic_desert	mud	sediment	aerobe	https://www.qiagen.com/us/cmp/ecom/powersoilkits?COECM_MOBIO_Branded_1707_SEA_PowerSoil__&kwid=%2Bpower%20%2Bsoil%20%2Brna	https://github.com/FranckLejzerowicz/protocols	TruSeq_Nano_PCR_free_Library_Preparation_Kit_single-end	uchime_4.2	TRUE	17.3	F1-S	15-Y	TAGTGACTAAGGGCACCACAAGAACGC	TGTCATAGCCACCTATCACACAATCATG	FWD:_{AAGGGCACCACAAGAACGC}_REV:_{CCACCTATCACACAATCATG}	F1-S_15-Y	TAGTGACTAAGGGCACCACAAGAACGC_TGTCATAGCCACCTATCACACAATCATG	AB02_37F_DNA_B_2_1	1717014	TruSeq	normalized	2016-05-20		Illumina	MiSeq	none	Lane_MiSeq_37F	40	86.68	4	46	initial_denaturation:95_5;_denaturation:_94_0.5;_annealing:52_0.2;_elongation:_72_1;_40_cycles;_final_elongation:72_2	7	5.71	39.97
37F.DNA.105.A	CCCTCTGT	CCCTCTGT	18S_rRNA	37F	37F	DNA	105	A	No	MIMARKS-survey	DSMP	gene|marine_metagenome|uncultured_microorganism|uncultured_organism|ecotype|biological_replicate|technical_replicate|interspecies_interaction_between_organisms	0	marine_abyssal_zone_biome	marine_oligotrophic_desert	mud	sediment	aerobe	https://www.qiagen.com/us/cmp/ecom/powersoilkits?COECM_MOBIO_Branded_1707_SEA_PowerSoil__&kwid=%2Bpower%20%2Bsoil%20%2Brna	https://github.com/FranckLejzerowicz/protocols	TruSeq_Nano_PCR_free_Library_Preparation_Kit_single-end	uchime_4.2	TRUE	17.7	F1-T	15-A	TCACGATAAAGGGCACCACAAGAACGC	AGACACACCCACCTATCACACAATCATG	FWD:_{AAGGGCACCACAAGAACGC}_REV:_{CCACCTATCACACAATCATG}	F1-T_15-A	TCACGATAAAGGGCACCACAAGAACGC_AGACACACCCACCTATCACACAATCATG	AB02_37F_DNA_A_2_1	1515177	TruSeq	normalized	2016-05-20		Illumina	MiSeq	none	Lane_MiSeq_37F	40	112.19	4	46	initial_denaturation:95_5;_denaturation:_94_0.5;_annealing:52_0.2;_elongation:_72_1;_40_cycles;_final_elongation:72_2	11.1	3.6	39.96
37F.DNA.105.B	CCCTCTTC	CCCTCTTC	18S_rRNA	37F	37F	DNA	105	B	No	MIMARKS-survey	DSMP	gene|marine_metagenome|uncultured_microorganism|uncultured_organism|ecotype|biological_replicate|technical_replicate|interspecies_interaction_between_organisms	0	marine_abyssal_zone_biome	marine_oligotrophic_desert	mud	sediment	aerobe	https://www.qiagen.com/us/cmp/ecom/powersoilkits?COECM_MOBIO_Branded_1707_SEA_PowerSoil__&kwid=%2Bpower%20%2Bsoil%20%2Brna	https://github.com/FranckLejzerowicz/protocols	TruSeq_Nano_PCR_free_Library_Preparation_Kit_single-end	uchime_4.2	TRUE	17.7	F1-T	15-A	TCACGATAAAGGGCACCACAAGAACGC	AGACACACCCACCTATCACACAATCATG	FWD:_{AAGGGCACCACAAGAACGC}_REV:_{CCACCTATCACACAATCATG}	F1-T_15-A	TCACGATAAAGGGCACCACAAGAACGC_AGACACACCCACCTATCACACAATCATG	AB02_37F_DNA_B_2_1	1717014	TruSeq	normalized	2016-05-20		Illumina	MiSeq	none	Lane_MiSeq_37F	40	86.68	4	46	initial_denaturation:95_5;_denaturation:_94_0.5;_annealing:52_0.2;_elongation:_72_1;_40_cycles;_final_elongation:72_2	11.1	3.6	39.96
37F.DNA.106.A	CCCTCTTG	CCCTCTTG	18S_rRNA	37F	37F	DNA	106	A	No	MIMARKS-survey	DSMP	gene|marine_metagenome|uncultured_microorganism|uncultured_organism|ecotype|biological_replicate|technical_replicate|interspecies_interaction_between_organisms	0	marine_abyssal_zone_biome	marine_oligotrophic_desert	mud	sediment	aerobe	https://www.qiagen.com/us/cmp/ecom/powersoilkits?COECM_MOBIO_Branded_1707_SEA_PowerSoil__&kwid=%2Bpower%20%2Bsoil%20%2Brna	https://github.com/FranckLejzerowicz/protocols	TruSeq_Nano_PCR_free_Library_Preparation_Kit_single-end	uchime_4.2	TRUE	18	F1-T	15-F	TCACGATAAAGGGCACCACAAGAACGC	ATATCTACCCACCTATCACACAATCATG	FWD:_{AAGGGCACCACAAGAACGC}_REV:_{CCACCTATCACACAATCATG}	F1-T_15-F	TCACGATAAAGGGCACCACAAGAACGC_ATATCTACCCACCTATCACACAATCATG	AB02_37F_DNA_A_2_1	1515177	TruSeq	normalized	2016-05-20		Illumina	MiSeq	none	Lane_MiSeq_37F	40	112.19	4	46	initial_denaturation:95_5;_denaturation:_94_0.5;_annealing:52_0.2;_elongation:_72_1;_40_cycles;_final_elongation:72_2	9.72	4.12	40.05
37F.DNA.106.B	CCCTCTTT	CCCTCTTT	18S_rRNA	37F	37F	DNA	106	B	No	MIMARKS-survey	DSMP	gene|marine_metagenome|uncultured_microorganism|uncultured_organism|ecotype|biological_replicate|technical_replicate|interspecies_interaction_between_organisms	0	marine_abyssal_zone_biome	marine_oligotrophic_desert	mud	sediment	aerobe	https://www.qiagen.com/us/cmp/ecom/powersoilkits?COECM_MOBIO_Branded_1707_SEA_PowerSoil__&kwid=%2Bpower%20%2Bsoil%20%2Brna	https://github.com/FranckLejzerowicz/protocols	TruSeq_Nano_PCR_free_Library_Preparation_Kit_single-end	uchime_4.2	TRUE	18	F1-T	15-F	TCACGATAAAGGGCACCACAAGAACGC	ATATCTACCCACCTATCACACAATCATG	FWD:_{AAGGGCACCACAAGAACGC}_REV:_{CCACCTATCACACAATCATG}	F1-T_15-F	TCACGATAAAGGGCACCACAAGAACGC_ATATCTACCCACCTATCACACAATCATG	AB02_37F_DNA_B_2_1	1717014	TruSeq	normalized	2016-05-20		Illumina	MiSeq	none	Lane_MiSeq_37F	40	86.68	4	46	initial_denaturation:95_5;_denaturation:_94_0.5;_annealing:52_0.2;_elongation:_72_1;_40_cycles;_final_elongation:72_2	9.72	4.12	40.05
37F.DNA.107.A	CCCTGCCC	CCCTGCCC	18S_rRNA	37F	37F	DNA	107	A	No	MIMARKS-survey	DSMP	gene|marine_metagenome|uncultured_microorganism|uncultured_organism|ecotype|biological_replicate|technical_replicate|interspecies_interaction_between_organisms	0	marine_abyssal_zone_biome	marine_oligotrophic_desert	mud	sediment	aerobe	https://www.qiagen.com/us/cmp/ecom/powersoilkits?COECM_MOBIO_Branded_1707_SEA_PowerSoil__&kwid=%2Bpower%20%2Bsoil%20%2Brna	https://github.com/FranckLejzerowicz/protocols	TruSeq_Nano_PCR_free_Library_Preparation_Kit_single-end	uchime_4.2	TRUE	18	F1-T	15-L	TCACGATAAAGGGCACCACAAGAACGC	CATGCAGTCCACCTATCACACAATCATG	FWD:_{AAGGGCACCACAAGAACGC}_REV:_{CCACCTATCACACAATCATG}	F1-T_15-L	TCACGATAAAGGGCACCACAAGAACGC_CATGCAGTCCACCTATCACACAATCATG	AB02_37F_DNA_A_2_1	1515177	TruSeq	normalized	2016-05-20		Illumina	MiSeq	none	Lane_MiSeq_37F	40	112.19	4	46	initial_denaturation:95_5;_denaturation:_94_0.5;_annealing:52_0.2;_elongation:_72_1;_40_cycles;_final_elongation:72_2	12.6	3.17	39.94
37F.DNA.107.B	CCCTGCCG	CCCTGCCG	18S_rRNA	37F	37F	DNA	107	B	No	MIMARKS-survey	DSMP	gene|marine_metagenome|uncultured_microorganism|uncultured_organism|ecotype|biological_replicate|technical_replicate|interspecies_interaction_between_organisms	0	marine_abyssal_zone_biome	marine_oligotrophic_desert	mud	sediment	aerobe	https://www.qiagen.com/us/cmp/ecom/powersoilkits?COECM_MOBIO_Branded_1707_SEA_PowerSoil__&kwid=%2Bpower%20%2Bsoil%20%2Brna	https://github.com/FranckLejzerowicz/protocols	TruSeq_Nano_PCR_free_Library_Preparation_Kit_single-end	uchime_4.2	TRUE	18	F1-T	15-L	TCACGATAAAGGGCACCACAAGAACGC	CATGCAGTCCACCTATCACACAATCATG	FWD:_{AAGGGCACCACAAGAACGC}_REV:_{CCACCTATCACACAATCATG}	F1-T_15-L	TCACGATAAAGGGCACCACAAGAACGC_CATGCAGTCCACCTATCACACAATCATG	AB02_37F_DNA_B_2_1	1717014	TruSeq	normalized	2016-05-20		Illumina	MiSeq	none	Lane_MiSeq_37F	40	86.68	4	46	initial_denaturation:95_5;_denaturation:_94_0.5;_annealing:52_0.2;_elongation:_72_1;_40_cycles;_final_elongation:72_2	12.6	3.17	39.94
37F.DNA.108.A	CCCTGCCT	CCCTGCCT	18S_rRNA	37F	37F	DNA	108	A	No	MIMARKS-survey	DSMP	gene|marine_metagenome|uncultured_microorganism|uncultured_organism|ecotype|biological_replicate|technical_replicate|interspecies_interaction_between_organisms	0	marine_abyssal_zone_biome	marine_oligotrophic_desert	mud	sediment	aerobe	https://www.qiagen.com/us/cmp/ecom/powersoilkits?COECM_MOBIO_Branded_1707_SEA_PowerSoil__&kwid=%2Bpower%20%2Bsoil%20%2Brna	https://github.com/FranckLejzerowicz/protocols	TruSeq_Nano_PCR_free_Library_Preparation_Kit_single-end	uchime_4.2	TRUE	17	F1-T	15-U	TCACGATAAAGGGCACCACAAGAACGC	TATCGCTGCCACCTATCACACAATCATG	FWD:_{AAGGGCACCACAAGAACGC}_REV:_{CCACCTATCACACAATCATG}	F1-T_15-U	TCACGATAAAGGGCACCACAAGAACGC_TATCGCTGCCACCTATCACACAATCATG	AB02_37F_DNA_A_2_1	1515177	TruSeq	normalized	2016-05-20		Illumina	MiSeq	none	Lane_MiSeq_37F	40	112.19	4	46	initial_denaturation:95_5;_denaturation:_94_0.5;_annealing:52_0.2;_elongation:_72_1;_40_cycles;_final_elongation:72_2	9.81	4.08	40.02
37F.DNA.108.B	CCCTGCGC	CCCTGCGC	18S_rRNA	37F	37F	DNA	108	B	No	MIMARKS-survey	DSMP	gene|marine_metagenome|uncultured_microorganism|uncultured_organism|ecotype|biological_replicate|technical_replicate|interspecies_interaction_between_organisms	0	marine_abyssal_zone_biome	marine_oligotrophic_desert	mud	sediment	aerobe	https://www.qiagen.com/us/cmp/ecom/powersoilkits?COECM_MOBIO_Branded_1707_SEA_PowerSoil__&kwid=%2Bpower%20%2Bsoil%20%2Brna	https://github.com/FranckLejzerowicz/protocols	TruSeq_Nano_PCR_free_Library_Preparation_Kit_single-end	uchime_4.2	TRUE	17	F1-T	15-U	TCACGATAAAGGGCACCACAAGAACGC	TATCGCTGCCACCTATCACACAATCATG	FWD:_{AAGGGCACCACAAGAACGC}_REV:_{CCACCTATCACACAATCATG}	F1-T_15-U	TCACGATAAAGGGCACCACAAGAACGC_TATCGCTGCCACCTATCACACAATCATG	AB02_37F_DNA_B_2_1	1717014	TruSeq	normalized	2016-05-20		Illumina	MiSeq	none	Lane_MiSeq_37F	40	86.68	4	46	initial_denaturation:95_5;_denaturation:_94_0.5;_annealing:52_0.2;_elongation:_72_1;_40_cycles;_final_elongation:72_2	9.81	4.08	40.02
37F.DNA.109.A	CCCTGCGG	CCCTGCGG	18S_rRNA	37F	37F	DNA	109	A	No	MIMARKS-survey	DSMP	gene|marine_metagenome|uncultured_microorganism|uncultured_organism|ecotype|biological_replicate|technical_replicate|interspecies_interaction_between_organisms	0	marine_abyssal_zone_biome	marine_oligotrophic_desert	mud	sediment	aerobe	https://www.qiagen.com/us/cmp/ecom/powersoilkits?COECM_MOBIO_Branded_1707_SEA_PowerSoil__&kwid=%2Bpower%20%2Bsoil%20%2Brna	https://github.com/FranckLejzerowicz/protocols	TruSeq_Nano_PCR_free_Library_Preparation_Kit_single-end	uchime_4.2	TRUE	10.9	F1-U	15-C	TCGTCTATAAGGGCACCACAAGAACGC	AGTCGCGTCCACCTATCACACAATCATG	FWD:_{AAGGGCACCACAAGAACGC}_REV:_{CCACCTATCACACAATCATG}	F1-U_15-C	TCGTCTATAAGGGCACCACAAGAACGC_AGTCGCGTCCACCTATCACACAATCATG	AB02_37F_DNA_A_2_1	1515177	TruSeq	normalized	2016-05-20		Illumina	MiSeq	none	Lane_MiSeq_37F	40	112.19	4	46	initial_denaturation:95_5;_denaturation:_94_0.5;_annealing:52_0.2;_elongation:_72_1;_40_cycles;_final_elongation:72_2	9.87	4.05	39.97
37F.DNA.109.B	CCCTGCGT	CCCTGCGT	18S_rRNA	37F	37F	DNA	109	B	No	MIMARKS-survey	DSMP	gene|marine_metagenome|uncultured_microorganism|uncultured_organism|ecotype|biological_replicate|technical_replicate|interspecies_interaction_between_organisms	0	marine_abyssal_zone_biome	marine_oligotrophic_desert	mud	sediment	aerobe	https://www.qiagen.com/us/cmp/ecom/powersoilkits?COECM_MOBIO_Branded_1707_SEA_PowerSoil__&kwid=%2Bpower%20%2Bsoil%20%2Brna	https://github.com/FranckLejzerowicz/protocols	TruSeq_Nano_PCR_free_Library_Preparation_Kit_single-end	uchime_4.2	TRUE	10.9	F1-U	15-C	TCGTCTATAAGGGCACCACAAGAACGC	AGTCGCGTCCACCTATCACACAATCATG	FWD:_{AAGGGCACCACAAGAACGC}_REV:_{CCACCTATCACACAATCATG}	F1-U_15-C	TCGTCTATAAGGGCACCACAAGAACGC_AGTCGCGTCCACCTATCACACAATCATG	AB02_37F_DNA_B_2_1	1717014	TruSeq	normalized	2016-05-20		Illumina	MiSeq	none	Lane_MiSeq_37F	40	86.68	4	46	initial_denaturation:95_5;_denaturation:_94_0.5;_annealing:52_0.2;_elongation:_72_1;_40_cycles;_final_elongation:72_2	9.87	4.05	39.97
37F.DNA.110.A	CCCTGCTC	CCCTGCTC	18S_rRNA	37F	37F	DNA	110	A	No	MIMARKS-survey	DSMP	gene|marine_metagenome|uncultured_microorganism|uncultured_organism|ecotype|biological_replicate|technical_replicate|interspecies_interaction_between_organisms	0	marine_abyssal_zone_biome	marine_oligotrophic_desert	mud	sediment	aerobe	https://www.qiagen.com/us/cmp/ecom/powersoilkits?COECM_MOBIO_Branded_1707_SEA_PowerSoil__&kwid=%2Bpower%20%2Bsoil%20%2Brna	https://github.com/FranckLejzerowicz/protocols	TruSeq_Nano_PCR_free_Library_Preparation_Kit_single-end	uchime_4.2	TRUE	17.3	F1-U	15-E	TCGTCTATAAGGGCACCACAAGAACGC	ATAGACTGCCACCTATCACACAATCATG	FWD:_{AAGGGCACCACAAGAACGC}_REV:_{CCACCTATCACACAATCATG}	F1-U_15-E	TCGTCTATAAGGGCACCACAAGAACGC_ATAGACTGCCACCTATCACACAATCATG	AB02_37F_DNA_A_2_1	1515177	TruSeq	normalized	2016-05-20		Illumina	MiSeq	none	Lane_MiSeq_37F	40	112.19	4	46	initial_denaturation:95_5;_denaturation:_94_0.5;_annealing:52_0.2;_elongation:_72_1;_40_cycles;_final_elongation:72_2	5.18	7.72	39.99
37F.DNA.110.B	CCCTGCTG	CCCTGCTG	18S_rRNA	37F	37F	DNA	110	B	No	MIMARKS-survey	DSMP	gene|marine_metagenome|uncultured_microorganism|uncultured_organism|ecotype|biological_replicate|technical_replicate|interspecies_interaction_between_organisms	0	marine_abyssal_zone_biome	marine_oligotrophic_desert	mud	sediment	aerobe	https://www.qiagen.com/us/cmp/ecom/powersoilkits?COECM_MOBIO_Branded_1707_SEA_PowerSoil__&kwid=%2Bpower%20%2Bsoil%20%2Brna	https://github.com/FranckLejzerowicz/protocols	TruSeq_Nano_PCR_free_Library_Preparation_Kit_single-end	uchime_4.2	TRUE	17.3	F1-U	15-E	TCGTCTATAAGGGCACCACAAGAACGC	ATAGACTGCCACCTATCACACAATCATG	FWD:_{AAGGGCACCACAAGAACGC}_REV:_{CCACCTATCACACAATCATG}	F1-U_15-E	TCGTCTATAAGGGCACCACAAGAACGC_ATAGACTGCCACCTATCACACAATCATG	AB02_37F_DNA_B_2_1	1717014	TruSeq	normalized	2016-05-20		Illumina	MiSeq	none	Lane_MiSeq_37F	40	86.68	4	46	initial_denaturation:95_5;_denaturation:_94_0.5;_annealing:52_0.2;_elongation:_72_1;_40_cycles;_final_elongation:72_2	5.18	7.72	39.99
37F.DNA.115.A	CCCTGGCG	CCCTGGCG	18S_rRNA	37F	37F	DNA	115	A	No	MIMARKS-survey	DSMP	gene|marine_metagenome|uncultured_microorganism|uncultured_organism|ecotype|biological_replicate|technical_replicate|interspecies_interaction_between_organisms	0	marine_abyssal_zone_biome	marine_oligotrophic_desert	mud	sediment	aerobe	https://www.qiagen.com/us/cmp/ecom/powersoilkits?COECM_MOBIO_Branded_1707_SEA_PowerSoil__&kwid=%2Bpower%20%2Bsoil%20%2Brna	https://github.com/FranckLejzerowicz/protocols	TruSeq_Nano_PCR_free_Library_Preparation_Kit_single-end	uchime_4.2	TRUE	45.3	F1-E	15-A	CAGTCGTAAAGGGCACCACAAGAACGC	AGACACACCCACCTATCACACAATCATG	FWD:_{AAGGGCACCACAAGAACGC}_REV:_{CCACCTATCACACAATCATG}	F1-E_15-A	CAGTCGTAAAGGGCACCACAAGAACGC_AGACACACCCACCTATCACACAATCATG	DSMP_37F_DNA_A_1_3	18703377	TruSeq	normalized	2017-07-04	TruSeq5	Illumina	HiSeq_2500	none	lane_pool37F	27.5	17.75	4	41	initial_denaturation:95_5;_denaturation:_94_0.5;_annealing:52_0.2;_elongation:_72_1;_40_cycles;_final_elongation:72_2	4.6	5.98	27.51
37F.DNA.115.B	CCCTGGCT	CCCTGGCT	18S_rRNA	37F	37F	DNA	115	B	No	MIMARKS-survey	DSMP	gene|marine_metagenome|uncultured_microorganism|uncultured_organism|ecotype|biological_replicate|technical_replicate|interspecies_interaction_between_organisms	0	marine_abyssal_zone_biome	marine_oligotrophic_desert	mud	sediment	aerobe	https://www.qiagen.com/us/cmp/ecom/powersoilkits?COECM_MOBIO_Branded_1707_SEA_PowerSoil__&kwid=%2Bpower%20%2Bsoil%20%2Brna	https://github.com/FranckLejzerowicz/protocols	TruSeq_Nano_PCR_free_Library_Preparation_Kit_single-end	uchime_4.2	TRUE	45.3	F1-E	15-A	CAGTCGTAAAGGGCACCACAAGAACGC	AGACACACCCACCTATCACACAATCATG	FWD:_{AAGGGCACCACAAGAACGC}_REV:_{CCACCTATCACACAATCATG}	F1-E_15-A	CAGTCGTAAAGGGCACCACAAGAACGC_AGACACACCCACCTATCACACAATCATG	DSMP_37F_DNA_B_1_2	2198874	TruSeq	normalized	2017-07-04	TruSeq9	Illumina	HiSeq_2500	none	lane_pool37F	40	307.78	4	42	initial_denaturation:95_5;_denaturation:_94_0.5;_annealing:52_0.2;_elongation:_72_1;_40_cycles;_final_elongation:72_2	7.4	5.41	40.03
37F.DNA.116.A	CCCTGGGC	CCCTGGGC	18S_rRNA	37F	37F	DNA	116	A	No	MIMARKS-survey	DSMP	gene|marine_metagenome|uncultured_microorganism|uncultured_organism|ecotype|biological_replicate|technical_replicate|interspecies_interaction_between_organisms	0	marine_abyssal_zone_biome	marine_oligotrophic_desert	mud	sediment	aerobe	https://www.qiagen.com/us/cmp/ecom/powersoilkits?COECM_MOBIO_Branded_1707_SEA_PowerSoil__&kwid=%2Bpower%20%2Bsoil%20%2Brna	https://github.com/FranckLejzerowicz/protocols	TruSeq_Nano_PCR_free_Library_Preparation_Kit_single-end	uchime_4.2	TRUE	54	F1-E	15-D	CAGTCGTAAAGGGCACCACAAGAACGC	AGTGCTGCCCACCTATCACACAATCATG	FWD:_{AAGGGCACCACAAGAACGC}_REV:_{CCACCTATCACACAATCATG}	F1-E_15-D	CAGTCGTAAAGGGCACCACAAGAACGC_AGTGCTGCCCACCTATCACACAATCATG	DSMP_37F_DNA_A_1_3	18703377	TruSeq	normalized	2017-07-04	TruSeq5	Illumina	HiSeq_2500	none	lane_pool37F	27.5	17.75	4	41	initial_denaturation:95_5;_denaturation:_94_0.5;_annealing:52_0.2;_elongation:_72_1;_40_cycles;_final_elongation:72_2	1.9	14.47	27.49
37F.DNA.116.B	CCCTGGGG	CCCTGGGG	18S_rRNA	37F	37F	DNA	116	B	No	MIMARKS-survey	DSMP	gene|marine_metagenome|uncultured_microorganism|uncultured_organism|ecotype|biological_replicate|technical_replicate|interspecies_interaction_between_organisms	0	marine_abyssal_zone_biome	marine_oligotrophic_desert	mud	sediment	aerobe	https://www.qiagen.com/us/cmp/ecom/powersoilkits?COECM_MOBIO_Branded_1707_SEA_PowerSoil__&kwid=%2Bpower%20%2Bsoil%20%2Brna	https://github.com/FranckLejzerowicz/protocols	TruSeq_Nano_PCR_free_Library_Preparation_Kit_single-end	uchime_4.2	TRUE	54	F1-E	15-D	CAGTCGTAAAGGGCACCACAAGAACGC	AGTGCTGCCCACCTATCACACAATCATG	FWD:_{AAGGGCACCACAAGAACGC}_REV:_{CCACCTATCACACAATCATG}	F1-E_15-D	CAGTCGTAAAGGGCACCACAAGAACGC_AGTGCTGCCCACCTATCACACAATCATG	DSMP_37F_DNA_B_1_1	2278945	TruSeq	normalized	2017-07-04	TruSeq8	Illumina	HiSeq_2500	none	lane_pool37F	40	337.28	4	42	initial_denaturation:95_5;_denaturation:_94_0.5;_annealing:52_0.2;_elongation:_72_1;_40_cycles;_final_elongation:72_2	5.7	7.02	40.01
37F.DNA.117.A	CCCTGGGT	CCCTGGGT	18S_rRNA	37F	37F	DNA	117	A	No	MIMARKS-survey	DSMP	gene|marine_metagenome|uncultured_microorganism|uncultured_organism|ecotype|biological_replicate|technical_replicate|interspecies_interaction_between_organisms	0	marine_abyssal_zone_biome	marine_oligotrophic_desert	mud	sediment	aerobe	https://www.qiagen.com/us/cmp/ecom/powersoilkits?COECM_MOBIO_Branded_1707_SEA_PowerSoil__&kwid=%2Bpower%20%2Bsoil%20%2Brna	https://github.com/FranckLejzerowicz/protocols	TruSeq_Nano_PCR_free_Library_Preparation_Kit_single-end	uchime_4.2	TRUE	35.9	F1-E	15-K	CAGTCGTAAAGGGCACCACAAGAACGC	CATCGTACCCACCTATCACACAATCATG	FWD:_{AAGGGCACCACAAGAACGC}_REV:_{CCACCTATCACACAATCATG}	F1-E_15-K	CAGTCGTAAAGGGCACCACAAGAACGC_CATCGTACCCACCTATCACACAATCATG	DSMP_37F_DNA_A_1_2	15316119	TruSeq	normalized	2017-07-04	TruSeq4	Illumina	HiSeq_2500	none	lane_pool37F	27	20.04	4	42	initial_denaturation:95_5;_denaturation:_94_0.5;_annealing:52_0.2;_elongation:_72_1;_40_cycles;_final_elongation:72_2	3.2	8.44	27.01
37F.DNA.117.B	CCCTGGTC	CCCTGGTC	18S_rRNA	37F	37F	DNA	117	B	No	MIMARKS-survey	DSMP	gene|marine_metagenome|uncultured_microorganism|uncultured_organism|ecotype|biological_replicate|technical_replicate|interspecies_interaction_between_organisms	0	marine_abyssal_zone_biome	marine_oligotrophic_desert	mud	sediment	aerobe	https://www.qiagen.com/us/cmp/ecom/powersoilkits?COECM_MOBIO_Branded_1707_SEA_PowerSoil__&kwid=%2Bpower%20%2Bsoil%20%2Brna	https://github.com/FranckLejzerowicz/protocols	TruSeq_Nano_PCR_free_Library_Preparation_Kit_single-end	uchime_4.2	TRUE	35.9	F1-E	15-K	CAGTCGTAAAGGGCACCACAAGAACGC	CATCGTACCCACCTATCACACAATCATG	FWD:_{AAGGGCACCACAAGAACGC}_REV:_{CCACCTATCACACAATCATG}	F1-E_15-K	CAGTCGTAAAGGGCACCACAAGAACGC_CATCGTACCCACCTATCACACAATCATG	DSMP_37F_DNA_B_1_3	1877212	TruSeq	normalized	2017-07-04	TruSeq10	Illumina	HiSeq_2500	none	lane_pool37F	40	535.96	4	41	initial_denaturation:95_5;_denaturation:_94_0.5;_annealing:52_0.2;_elongation:_72_1;_40_cycles;_final_elongation:72_2	4.2	9.52	39.98
37F.DNA.121.A	CCCTGTCT	CCCTGTCT	18S_rRNA	37F	37F	DNA	121	A	No	MIMARKS-survey	DSMP	gene|marine_metagenome|uncultured_microorganism|uncultured_organism|ecotype|biological_replicate|technical_replicate|interspecies_interaction_between_organisms	0	marine_abyssal_zone_biome	marine_oligotrophic_desert	mud	sediment	aerobe	https://www.qiagen.com/us/cmp/ecom/powersoilkits?COECM_MOBIO_Branded_1707_SEA_PowerSoil__&kwid=%2Bpower%20%2Bsoil%20%2Brna	https://github.com/FranckLejzerowicz/protocols	TruSeq_Nano_PCR_free_Library_Preparation_Kit_single-end	uchime_4.2	TRUE	15.2	F1-V	15-Z	TGACGTCTAAGGGCACCACAAGAACGC	TGTGCATGCCACCTATCACACAATCATG	FWD:_{AAGGGCACCACAAGAACGC}_REV:_{CCACCTATCACACAATCATG}	F1-V_15-Z	TGACGTCTAAGGGCACCACAAGAACGC_TGTGCATGCCACCTATCACACAATCATG	AB02_37F_DNA_A_2_1	1515177	TruSeq	normalized	2016-05-20		Illumina	MiSeq	none	Lane_MiSeq_37F	40	112.19	4	46	initial_denaturation:95_5;_denaturation:_94_0.5;_annealing:52_0.2;_elongation:_72_1;_40_cycles;_final_elongation:72_2	8.5	4.71	40.03
37F.DNA.121.B	CCCTGTGC	CCCTGTGC	18S_rRNA	37F	37F	DNA	121	B	No	MIMARKS-survey	DSMP	gene|marine_metagenome|uncultured_microorganism|uncultured_organism|ecotype|biological_replicate|technical_replicate|interspecies_interaction_between_organisms	0	marine_abyssal_zone_biome	marine_oligotrophic_desert	mud	sediment	aerobe	https://www.qiagen.com/us/cmp/ecom/powersoilkits?COECM_MOBIO_Branded_1707_SEA_PowerSoil__&kwid=%2Bpower%20%2Bsoil%20%2Brna	https://github.com/FranckLejzerowicz/protocols	TruSeq_Nano_PCR_free_Library_Preparation_Kit_single-end	uchime_4.2	TRUE	15.2	F1-V	15-Z	TGACGTCTAAGGGCACCACAAGAACGC	TGTGCATGCCACCTATCACACAATCATG	FWD:_{AAGGGCACCACAAGAACGC}_REV:_{CCACCTATCACACAATCATG}	F1-V_15-Z	TGACGTCTAAGGGCACCACAAGAACGC_TGTGCATGCCACCTATCACACAATCATG	AB02_37F_DNA_B_2_1	1717014	TruSeq	normalized	2016-05-20		Illumina	MiSeq	none	Lane_MiSeq_37F	40	86.68	4	46	initial_denaturation:95_5;_denaturation:_94_0.5;_annealing:52_0.2;_elongation:_72_1;_40_cycles;_final_elongation:72_2	8.5	4.71	40.03
37F.DNA.122.A	CCCTGTGG	CCCTGTGG	18S_rRNA	37F	37F	DNA	122	A	No	MIMARKS-survey	DSMP	gene|marine_metagenome|uncultured_microorganism|uncultured_organism|ecotype|biological_replicate|technical_replicate|interspecies_interaction_between_organisms	0	marine_abyssal_zone_biome	marine_oligotrophic_desert	mud	sediment	aerobe	https://www.qiagen.com/us/cmp/ecom/powersoilkits?COECM_MOBIO_Branded_1707_SEA_PowerSoil__&kwid=%2Bpower%20%2Bsoil%20%2Brna	https://github.com/FranckLejzerowicz/protocols	TruSeq_Nano_PCR_free_Library_Preparation_Kit_single-end	uchime_4.2	TRUE	15.1	F1-W	15-D	TGACTGACAAGGGCACCACAAGAACGC	AGTGCTGCCCACCTATCACACAATCATG	FWD:_{AAGGGCACCACAAGAACGC}_REV:_{CCACCTATCACACAATCATG}	F1-W_15-D	TGACTGACAAGGGCACCACAAGAACGC_AGTGCTGCCCACCTATCACACAATCATG	AB02_37F_DNA_A_2_1	1515177	TruSeq	normalized	2016-05-20		Illumina	MiSeq	none	Lane_MiSeq_37F	40	112.19	4	46	initial_denaturation:95_5;_denaturation:_94_0.5;_annealing:52_0.2;_elongation:_72_1;_40_cycles;_final_elongation:72_2	10	4	40
37F.DNA.122.B	CCCTGTGT	CCCTGTGT	18S_rRNA	37F	37F	DNA	122	B	No	MIMARKS-survey	DSMP	gene|marine_metagenome|uncultured_microorganism|uncultured_organism|ecotype|biological_replicate|technical_replicate|interspecies_interaction_between_organisms	0	marine_abyssal_zone_biome	marine_oligotrophic_desert	mud	sediment	aerobe	https://www.qiagen.com/us/cmp/ecom/powersoilkits?COECM_MOBIO_Branded_1707_SEA_PowerSoil__&kwid=%2Bpower%20%2Bsoil%20%2Brna	https://github.com/FranckLejzerowicz/protocols	TruSeq_Nano_PCR_free_Library_Preparation_Kit_single-end	uchime_4.2	TRUE	15.1	F1-W	15-D	TGACTGACAAGGGCACCACAAGAACGC	AGTGCTGCCCACCTATCACACAATCATG	FWD:_{AAGGGCACCACAAGAACGC}_REV:_{CCACCTATCACACAATCATG}	F1-W_15-D	TGACTGACAAGGGCACCACAAGAACGC_AGTGCTGCCCACCTATCACACAATCATG	AB02_37F_DNA_B_2_1	1717014	TruSeq	normalized	2016-05-20		Illumina	MiSeq	none	Lane_MiSeq_37F	40	86.68	4	46	initial_denaturation:95_5;_denaturation:_94_0.5;_annealing:52_0.2;_elongation:_72_1;_40_cycles;_final_elongation:72_2	10	4	40
37F.DNA.123.A	CCCTGTTC	CCCTGTTC	18S_rRNA	37F	37F	DNA	123	A	No	MIMARKS-survey	DSMP	gene|marine_metagenome|uncultured_microorganism|uncultured_organism|ecotype|biological_replicate|technical_replicate|interspecies_interaction_between_organisms	0	marine_abyssal_zone_biome	marine_oligotrophic_desert	mud	sediment	aerobe	https://www.qiagen.com/us/cmp/ecom/powersoilkits?COECM_MOBIO_Branded_1707_SEA_PowerSoil__&kwid=%2Bpower%20%2Bsoil%20%2Brna	https://github.com/FranckLejzerowicz/protocols	TruSeq_Nano_PCR_free_Library_Preparation_Kit_single-end	uchime_4.2	TRUE	17.7	F1-W	15-Q	TGACTGACAAGGGCACCACAAGAACGC	CTGCACGCCCACCTATCACACAATCATG	FWD:_{AAGGGCACCACAAGAACGC}_REV:_{CCACCTATCACACAATCATG}	F1-W_15-Q	TGACTGACAAGGGCACCACAAGAACGC_CTGCACGCCCACCTATCACACAATCATG	AB02_37F_DNA_A_2_1	1515177	TruSeq	normalized	2016-05-20		Illumina	MiSeq	none	Lane_MiSeq_37F	40	112.19	4	46	initial_denaturation:95_5;_denaturation:_94_0.5;_annealing:52_0.2;_elongation:_72_1;_40_cycles;_final_elongation:72_2	11.6	3.45	40.02
37F.DNA.123.B	CCCTGTTG	CCCTGTTG	18S_rRNA	37F	37F	DNA	123	B	No	MIMARKS-survey	DSMP	gene|marine_metagenome|uncultured_microorganism|uncultured_organism|ecotype|biological_replicate|technical_replicate|interspecies_interaction_between_organisms	0	marine_abyssal_zone_biome	marine_oligotrophic_desert	mud	sediment	aerobe	https://www.qiagen.com/us/cmp/ecom/powersoilkits?COECM_MOBIO_Branded_1707_SEA_PowerSoil__&kwid=%2Bpower%20%2Bsoil%20%2Brna	https://github.com/FranckLejzerowicz/protocols	TruSeq_Nano_PCR_free_Library_Preparation_Kit_single-end	uchime_4.2	TRUE	17.7	F1-W	15-Q	TGACTGACAAGGGCACCACAAGAACGC	CTGCACGCCCACCTATCACACAATCATG	FWD:_{AAGGGCACCACAAGAACGC}_REV:_{CCACCTATCACACAATCATG}	F1-W_15-Q	TGACTGACAAGGGCACCACAAGAACGC_CTGCACGCCCACCTATCACACAATCATG	AB02_37F_DNA_B_2_1	1717014	TruSeq	normalized	2016-05-20		Illumina	MiSeq	none	Lane_MiSeq_37F	40	86.68	4	46	initial_denaturation:95_5;_denaturation:_94_0.5;_annealing:52_0.2;_elongation:_72_1;_40_cycles;_final_elongation:72_2	11.6	3.45	40.02
37F.DNA.124.A	CCCTGTTT	CCCTGTTT	18S_rRNA	37F	37F	DNA	124	A	No	MIMARKS-survey	DSMP	gene|marine_metagenome|uncultured_microorganism|uncultured_organism|ecotype|biological_replicate|technical_replicate|interspecies_interaction_between_organisms	0	marine_abyssal_zone_biome	marine_oligotrophic_desert	mud	sediment	aerobe	https://www.qiagen.com/us/cmp/ecom/powersoilkits?COECM_MOBIO_Branded_1707_SEA_PowerSoil__&kwid=%2Bpower%20%2Bsoil%20%2Brna	https://github.com/FranckLejzerowicz/protocols	TruSeq_Nano_PCR_free_Library_Preparation_Kit_single-end	uchime_4.2	TRUE	13.8	F1-W	15-T	TGACTGACAAGGGCACCACAAGAACGC	TAGTGAGCCCACCTATCACACAATCATG	FWD:_{AAGGGCACCACAAGAACGC}_REV:_{CCACCTATCACACAATCATG}	F1-W_15-T	TGACTGACAAGGGCACCACAAGAACGC_TAGTGAGCCCACCTATCACACAATCATG	AB02_37F_DNA_A_2_1	1515177	TruSeq	normalized	2016-05-20		Illumina	MiSeq	none	Lane_MiSeq_37F	40	112.19	4	46	initial_denaturation:95_5;_denaturation:_94_0.5;_annealing:52_0.2;_elongation:_72_1;_40_cycles;_final_elongation:72_2	9	4.44	39.96
37F.DNA.124.B	CCCTTCCC	CCCTTCCC	18S_rRNA	37F	37F	DNA	124	B	No	MIMARKS-survey	DSMP	gene|marine_metagenome|uncultured_microorganism|uncultured_organism|ecotype|biological_replicate|technical_replicate|interspecies_interaction_between_organisms	0	marine_abyssal_zone_biome	marine_oligotrophic_desert	mud	sediment	aerobe	https://www.qiagen.com/us/cmp/ecom/powersoilkits?COECM_MOBIO_Branded_1707_SEA_PowerSoil__&kwid=%2Bpower%20%2Bsoil%20%2Brna	https://github.com/FranckLejzerowicz/protocols	TruSeq_Nano_PCR_free_Library_Preparation_Kit_single-end	uchime_4.2	TRUE	13.8	F1-W	15-T	TGACTGACAAGGGCACCACAAGAACGC	TAGTGAGCCCACCTATCACACAATCATG	FWD:_{AAGGGCACCACAAGAACGC}_REV:_{CCACCTATCACACAATCATG}	F1-W_15-T	TGACTGACAAGGGCACCACAAGAACGC_TAGTGAGCCCACCTATCACACAATCATG	AB02_37F_DNA_B_2_1	1717014	TruSeq	normalized	2016-05-20		Illumina	MiSeq	none	Lane_MiSeq_37F	40	86.68	4	46	initial_denaturation:95_5;_denaturation:_94_0.5;_annealing:52_0.2;_elongation:_72_1;_40_cycles;_final_elongation:72_2	9	4.44	39.96
37F.DNA.125.A	CCCTTCCG	CCCTTCCG	18S_rRNA	37F	37F	DNA	125	A	No	MIMARKS-survey	DSMP	gene|marine_metagenome|uncultured_microorganism|uncultured_organism|ecotype|biological_replicate|technical_replicate|interspecies_interaction_between_organisms	0	marine_abyssal_zone_biome	marine_oligotrophic_desert	mud	sediment	aerobe	https://www.qiagen.com/us/cmp/ecom/powersoilkits?COECM_MOBIO_Branded_1707_SEA_PowerSoil__&kwid=%2Bpower%20%2Bsoil%20%2Brna	https://github.com/FranckLejzerowicz/protocols	TruSeq_Nano_PCR_free_Library_Preparation_Kit_single-end	uchime_4.2	TRUE	11.1	F1-X	15-A	TGCAGTACAAGGGCACCACAAGAACGC	AGACACACCCACCTATCACACAATCATG	FWD:_{AAGGGCACCACAAGAACGC}_REV:_{CCACCTATCACACAATCATG}	F1-X_15-A	TGCAGTACAAGGGCACCACAAGAACGC_AGACACACCCACCTATCACACAATCATG	AB02_37F_DNA_A_2_1	1515177	TruSeq	normalized	2016-05-20		Illumina	MiSeq	none	Lane_MiSeq_37F	40	112.19	4	46	initial_denaturation:95_5;_denaturation:_94_0.5;_annealing:52_0.2;_elongation:_72_1;_40_cycles;_final_elongation:72_2	11.9	3.36	39.98
37F.DNA.125.B	CCCTTCCT	CCCTTCCT	18S_rRNA	37F	37F	DNA	125	B	No	MIMARKS-survey	DSMP	gene|marine_metagenome|uncultured_microorganism|uncultured_organism|ecotype|biological_replicate|technical_replicate|interspecies_interaction_between_organisms	0	marine_abyssal_zone_biome	marine_oligotrophic_desert	mud	sediment	aerobe	https://www.qiagen.com/us/cmp/ecom/powersoilkits?COECM_MOBIO_Branded_1707_SEA_PowerSoil__&kwid=%2Bpower%20%2Bsoil%20%2Brna	https://github.com/FranckLejzerowicz/protocols	TruSeq_Nano_PCR_free_Library_Preparation_Kit_single-end	uchime_4.2	TRUE	11.1	F1-X	15-A	TGCAGTACAAGGGCACCACAAGAACGC	AGACACACCCACCTATCACACAATCATG	FWD:_{AAGGGCACCACAAGAACGC}_REV:_{CCACCTATCACACAATCATG}	F1-X_15-A	TGCAGTACAAGGGCACCACAAGAACGC_AGACACACCCACCTATCACACAATCATG	AB02_37F_DNA_B_2_1	1717014	TruSeq	normalized	2016-05-20		Illumina	MiSeq	none	Lane_MiSeq_37F	40	86.68	4	46	initial_denaturation:95_5;_denaturation:_94_0.5;_annealing:52_0.2;_elongation:_72_1;_40_cycles;_final_elongation:72_2	11.9	3.36	39.98
37F.DNA.126.A	CCCTTCGC	CCCTTCGC	18S_rRNA	37F	37F	DNA	126	A	No	MIMARKS-survey	DSMP	gene|marine_metagenome|uncultured_microorganism|uncultured_organism|ecotype|biological_replicate|technical_replicate|interspecies_interaction_between_organisms	0	marine_abyssal_zone_biome	marine_oligotrophic_desert	mud	sediment	aerobe	https://www.qiagen.com/us/cmp/ecom/powersoilkits?COECM_MOBIO_Branded_1707_SEA_PowerSoil__&kwid=%2Bpower%20%2Bsoil%20%2Brna	https://github.com/FranckLejzerowicz/protocols	TruSeq_Nano_PCR_free_Library_Preparation_Kit_single-end	uchime_4.2	TRUE	15	F1-X	15-G	TGCAGTACAAGGGCACCACAAGAACGC	ATGCGTAGCCACCTATCACACAATCATG	FWD:_{AAGGGCACCACAAGAACGC}_REV:_{CCACCTATCACACAATCATG}	F1-X_15-G	TGCAGTACAAGGGCACCACAAGAACGC_ATGCGTAGCCACCTATCACACAATCATG	AB02_37F_DNA_A_2_1	1515177	TruSeq	normalized	2016-05-20		Illumina	MiSeq	none	Lane_MiSeq_37F	40	112.19	4	46	initial_denaturation:95_5;_denaturation:_94_0.5;_annealing:52_0.2;_elongation:_72_1;_40_cycles;_final_elongation:72_2	9.64	4.15	40.01
37F.DNA.126.B	CCCTTCGG	CCCTTCGG	18S_rRNA	37F	37F	DNA	126	B	No	MIMARKS-survey	DSMP	gene|marine_metagenome|uncultured_microorganism|uncultured_organism|ecotype|biological_replicate|technical_replicate|interspecies_interaction_between_organisms	0	marine_abyssal_zone_biome	marine_oligotrophic_desert	mud	sediment	aerobe	https://www.qiagen.com/us/cmp/ecom/powersoilkits?COECM_MOBIO_Branded_1707_SEA_PowerSoil__&kwid=%2Bpower%20%2Bsoil%20%2Brna	https://github.com/FranckLejzerowicz/protocols	TruSeq_Nano_PCR_free_Library_Preparation_Kit_single-end	uchime_4.2	TRUE	15	F1-X	15-G	TGCAGTACAAGGGCACCACAAGAACGC	ATGCGTAGCCACCTATCACACAATCATG	FWD:_{AAGGGCACCACAAGAACGC}_REV:_{CCACCTATCACACAATCATG}	F1-X_15-G	TGCAGTACAAGGGCACCACAAGAACGC_ATGCGTAGCCACCTATCACACAATCATG	AB02_37F_DNA_B_2_1	1717014	TruSeq	normalized	2016-05-20		Illumina	MiSeq	none	Lane_MiSeq_37F	40	86.68	4	46	initial_denaturation:95_5;_denaturation:_94_0.5;_annealing:52_0.2;_elongation:_72_1;_40_cycles;_final_elongation:72_2	9.64	4.15	40.01
37F.DNA.127.A	CCCTTCGT	CCCTTCGT	18S_rRNA	37F	37F	DNA	127	A	No	MIMARKS-survey	DSMP	gene|marine_metagenome|uncultured_microorganism|uncultured_organism|ecotype|biological_replicate|technical_replicate|interspecies_interaction_between_organisms	0	marine_abyssal_zone_biome	marine_oligotrophic_desert	mud	sediment	aerobe	https://www.qiagen.com/us/cmp/ecom/powersoilkits?COECM_MOBIO_Branded_1707_SEA_PowerSoil__&kwid=%2Bpower%20%2Bsoil%20%2Brna	https://github.com/FranckLejzerowicz/protocols	TruSeq_Nano_PCR_free_Library_Preparation_Kit_single-end	uchime_4.2	TRUE	16.7	F1-X	15-J	TGCAGTACAAGGGCACCACAAGAACGC	CAGTGCAGCCACCTATCACACAATCATG	FWD:_{AAGGGCACCACAAGAACGC}_REV:_{CCACCTATCACACAATCATG}	F1-X_15-J	TGCAGTACAAGGGCACCACAAGAACGC_CAGTGCAGCCACCTATCACACAATCATG	AB02_37F_DNA_A_2_1	1515177	TruSeq	normalized	2016-05-20		Illumina	MiSeq	none	Lane_MiSeq_37F	40	112.19	4	46	initial_denaturation:95_5;_denaturation:_94_0.5;_annealing:52_0.2;_elongation:_72_1;_40_cycles;_final_elongation:72_2	12.5	3.2	40
37F.DNA.127.B	CCCTTCTC	CCCTTCTC	18S_rRNA	37F	37F	DNA	127	B	No	MIMARKS-survey	DSMP	gene|marine_metagenome|uncultured_microorganism|uncultured_organism|ecotype|biological_replicate|technical_replicate|interspecies_interaction_between_organisms	0	marine_abyssal_zone_biome	marine_oligotrophic_desert	mud	sediment	aerobe	https://www.qiagen.com/us/cmp/ecom/powersoilkits?COECM_MOBIO_Branded_1707_SEA_PowerSoil__&kwid=%2Bpower%20%2Bsoil%20%2Brna	https://github.com/FranckLejzerowicz/protocols	TruSeq_Nano_PCR_free_Library_Preparation_Kit_single-end	uchime_4.2	TRUE	16.7	F1-X	15-J	TGCAGTACAAGGGCACCACAAGAACGC	CAGTGCAGCCACCTATCACACAATCATG	FWD:_{AAGGGCACCACAAGAACGC}_REV:_{CCACCTATCACACAATCATG}	F1-X_15-J	TGCAGTACAAGGGCACCACAAGAACGC_CAGTGCAGCCACCTATCACACAATCATG	AB02_37F_DNA_B_2_1	1717014	TruSeq	normalized	2016-05-20		Illumina	MiSeq	none	Lane_MiSeq_37F	40	86.68	4	46	initial_denaturation:95_5;_denaturation:_94_0.5;_annealing:52_0.2;_elongation:_72_1;_40_cycles;_final_elongation:72_2	12.5	3.2	40
37F.DNA.128.A	CCCTTCTG	CCCTTCTG	18S_rRNA	37F	37F	DNA	128	A	No	MIMARKS-survey	DSMP	gene|marine_metagenome|uncultured_microorganism|uncultured_organism|ecotype|biological_replicate|technical_replicate|interspecies_interaction_between_organisms	0	marine_abyssal_zone_biome	marine_oligotrophic_desert	mud	sediment	aerobe	https://www.qiagen.com/us/cmp/ecom/powersoilkits?COECM_MOBIO_Branded_1707_SEA_PowerSoil__&kwid=%2Bpower%20%2Bsoil%20%2Brna	https://github.com/FranckLejzerowicz/protocols	TruSeq_Nano_PCR_free_Library_Preparation_Kit_single-end	uchime_4.2	TRUE	17.3	F1-Y	15-C	TGCATATAAAGGGCACCACAAGAACGC	AGTCGCGTCCACCTATCACACAATCATG	FWD:_{AAGGGCACCACAAGAACGC}_REV:_{CCACCTATCACACAATCATG}	F1-Y_15-C	TGCATATAAAGGGCACCACAAGAACGC_AGTCGCGTCCACCTATCACACAATCATG	AB02_37F_DNA_A_2_1	1515177	TruSeq	normalized	2016-05-20		Illumina	MiSeq	none	Lane_MiSeq_37F	40	112.19	4	46	initial_denaturation:95_5;_denaturation:_94_0.5;_annealing:52_0.2;_elongation:_72_1;_40_cycles;_final_elongation:72_2	11.7	3.42	40.01
37F.DNA.128.B	CCCTTCTT	CCCTTCTT	18S_rRNA	37F	37F	DNA	128	B	No	MIMARKS-survey	DSMP	gene|marine_metagenome|uncultured_microorganism|uncultured_organism|ecotype|biological_replicate|technical_replicate|interspecies_interaction_between_organisms	0	marine_abyssal_zone_biome	marine_oligotrophic_desert	mud	sediment	aerobe	https://www.qiagen.com/us/cmp/ecom/powersoilkits?COECM_MOBIO_Branded_1707_SEA_PowerSoil__&kwid=%2Bpower%20%2Bsoil%20%2Brna	https://github.com/FranckLejzerowicz/protocols	TruSeq_Nano_PCR_free_Library_Preparation_Kit_single-end	uchime_4.2	TRUE	17.3	F1-Y	15-C	TGCATATAAAGGGCACCACAAGAACGC	AGTCGCGTCCACCTATCACACAATCATG	FWD:_{AAGGGCACCACAAGAACGC}_REV:_{CCACCTATCACACAATCATG}	F1-Y_15-C	TGCATATAAAGGGCACCACAAGAACGC_AGTCGCGTCCACCTATCACACAATCATG	AB02_37F_DNA_B_2_1	1717014	TruSeq	normalized	2016-05-20		Illumina	MiSeq	none	Lane_MiSeq_37F	40	86.68	4	46	initial_denaturation:95_5;_denaturation:_94_0.5;_annealing:52_0.2;_elongation:_72_1;_40_cycles;_final_elongation:72_2	11.7	3.42	40.01
37F.DNA.129.A	CCCTTGCC	CCCTTGCC	18S_rRNA	37F	37F	DNA	129	A	No	MIMARKS-survey	DSMP	gene|marine_metagenome|uncultured_microorganism|uncultured_organism|ecotype|biological_replicate|technical_replicate|interspecies_interaction_between_organisms	0	marine_abyssal_zone_biome	marine_oligotrophic_desert	mud	sediment	aerobe	https://www.qiagen.com/us/cmp/ecom/powersoilkits?COECM_MOBIO_Branded_1707_SEA_PowerSoil__&kwid=%2Bpower%20%2Bsoil%20%2Brna	https://github.com/FranckLejzerowicz/protocols	TruSeq_Nano_PCR_free_Library_Preparation_Kit_single-end	uchime_4.2	TRUE	14.4	F1-Y	15-H	TGCATATAAAGGGCACCACAAGAACGC	ATGTCAGTCCACCTATCACACAATCATG	FWD:_{AAGGGCACCACAAGAACGC}_REV:_{CCACCTATCACACAATCATG}	F1-Y_15-H	TGCATATAAAGGGCACCACAAGAACGC_ATGTCAGTCCACCTATCACACAATCATG	AB02_37F_DNA_A_2_1	1515177	TruSeq	normalized	2016-05-20		Illumina	MiSeq	none	Lane_MiSeq_37F	40	112.19	4	46	initial_denaturation:95_5;_denaturation:_94_0.5;_annealing:52_0.2;_elongation:_72_1;_40_cycles;_final_elongation:72_2	10.1	3.96	40
37F.DNA.129.B	CCCTTGCG	CCCTTGCG	18S_rRNA	37F	37F	DNA	129	B	No	MIMARKS-survey	DSMP	gene|marine_metagenome|uncultured_microorganism|uncultured_organism|ecotype|biological_replicate|technical_replicate|interspecies_interaction_between_organisms	0	marine_abyssal_zone_biome	marine_oligotrophic_desert	mud	sediment	aerobe	https://www.qiagen.com/us/cmp/ecom/powersoilkits?COECM_MOBIO_Branded_1707_SEA_PowerSoil__&kwid=%2Bpower%20%2Bsoil%20%2Brna	https://github.com/FranckLejzerowicz/protocols	TruSeq_Nano_PCR_free_Library_Preparation_Kit_single-end	uchime_4.2	TRUE	14.4	F1-Y	15-H	TGCATATAAAGGGCACCACAAGAACGC	ATGTCAGTCCACCTATCACACAATCATG	FWD:_{AAGGGCACCACAAGAACGC}_REV:_{CCACCTATCACACAATCATG}	F1-Y_15-H	TGCATATAAAGGGCACCACAAGAACGC_ATGTCAGTCCACCTATCACACAATCATG	AB02_37F_DNA_B_2_1	1717014	TruSeq	normalized	2016-05-20		Illumina	MiSeq	none	Lane_MiSeq_37F	40	86.68	4	46	initial_denaturation:95_5;_denaturation:_94_0.5;_annealing:52_0.2;_elongation:_72_1;_40_cycles;_final_elongation:72_2	10.1	3.96	40
37F.DNA.131.A	CCCTTGGG	CCCTTGGG	18S_rRNA	37F	37F	DNA	131	A	No	MIMARKS-survey	DSMP	gene|marine_metagenome|uncultured_microorganism|uncultured_organism|ecotype|biological_replicate|technical_replicate|interspecies_interaction_between_organisms	0	marine_abyssal_zone_biome	marine_oligotrophic_desert	mud	sediment	aerobe	https://www.qiagen.com/us/cmp/ecom/powersoilkits?COECM_MOBIO_Branded_1707_SEA_PowerSoil__&kwid=%2Bpower%20%2Bsoil%20%2Brna	https://github.com/FranckLejzerowicz/protocols	TruSeq_Nano_PCR_free_Library_Preparation_Kit_single-end	uchime_4.2	TRUE	17.3	F1-Y	15-U	TGCATATAAAGGGCACCACAAGAACGC	TATCGCTGCCACCTATCACACAATCATG	FWD:_{AAGGGCACCACAAGAACGC}_REV:_{CCACCTATCACACAATCATG}	F1-Y_15-U	TGCATATAAAGGGCACCACAAGAACGC_TATCGCTGCCACCTATCACACAATCATG	AB02_37F_DNA_A_2_1	1515177	TruSeq	normalized	2016-05-20		Illumina	MiSeq	none	Lane_MiSeq_37F	40	112.19	4	46	initial_denaturation:95_5;_denaturation:_94_0.5;_annealing:52_0.2;_elongation:_72_1;_40_cycles;_final_elongation:72_2	10.7	3.74	40.02
37F.DNA.131.B	CCCTTGGT	CCCTTGGT	18S_rRNA	37F	37F	DNA	131	B	No	MIMARKS-survey	DSMP	gene|marine_metagenome|uncultured_microorganism|uncultured_organism|ecotype|biological_replicate|technical_replicate|interspecies_interaction_between_organisms	0	marine_abyssal_zone_biome	marine_oligotrophic_desert	mud	sediment	aerobe	https://www.qiagen.com/us/cmp/ecom/powersoilkits?COECM_MOBIO_Branded_1707_SEA_PowerSoil__&kwid=%2Bpower%20%2Bsoil%20%2Brna	https://github.com/FranckLejzerowicz/protocols	TruSeq_Nano_PCR_free_Library_Preparation_Kit_single-end	uchime_4.2	TRUE	17.3	F1-Y	15-U	TGCATATAAAGGGCACCACAAGAACGC	TATCGCTGCCACCTATCACACAATCATG	FWD:_{AAGGGCACCACAAGAACGC}_REV:_{CCACCTATCACACAATCATG}	F1-Y_15-U	TGCATATAAAGGGCACCACAAGAACGC_TATCGCTGCCACCTATCACACAATCATG	AB02_37F_DNA_B_2_1	1717014	TruSeq	normalized	2016-05-20		Illumina	MiSeq	none	Lane_MiSeq_37F	40	86.68	4	46	initial_denaturation:95_5;_denaturation:_94_0.5;_annealing:52_0.2;_elongation:_72_1;_40_cycles;_final_elongation:72_2	10.7	3.74	40.02
37F.DNA.132.A	CCCTTGTC	CCCTTGTC	18S_rRNA	37F	37F	DNA	132	A	No	MIMARKS-survey	DSMP	gene|marine_metagenome|uncultured_microorganism|uncultured_organism|ecotype|biological_replicate|technical_replicate|interspecies_interaction_between_organisms	0	marine_abyssal_zone_biome	marine_oligotrophic_desert	mud	sediment	aerobe	https://www.qiagen.com/us/cmp/ecom/powersoilkits?COECM_MOBIO_Branded_1707_SEA_PowerSoil__&kwid=%2Bpower%20%2Bsoil%20%2Brna	https://github.com/FranckLejzerowicz/protocols	TruSeq_Nano_PCR_free_Library_Preparation_Kit_single-end	uchime_4.2	TRUE	18	F1-Z	15-B	TGCTCTCAAAGGGCACCACAAGAACGC	AGATGATGCCACCTATCACACAATCATG	FWD:_{AAGGGCACCACAAGAACGC}_REV:_{CCACCTATCACACAATCATG}	F1-Z_15-B	TGCTCTCAAAGGGCACCACAAGAACGC_AGATGATGCCACCTATCACACAATCATG	AB02_37F_DNA_A_2_1	1515177	TruSeq	normalized	2016-05-20		Illumina	MiSeq	none	Lane_MiSeq_37F	40	112.19	4	46	initial_denaturation:95_5;_denaturation:_94_0.5;_annealing:52_0.2;_elongation:_72_1;_40_cycles;_final_elongation:72_2	11.1	3.6	39.96
37F.DNA.132.B	CCCTTGTG	CCCTTGTG	18S_rRNA	37F	37F	DNA	132	B	No	MIMARKS-survey	DSMP	gene|marine_metagenome|uncultured_microorganism|uncultured_organism|ecotype|biological_replicate|technical_replicate|interspecies_interaction_between_organisms	0	marine_abyssal_zone_biome	marine_oligotrophic_desert	mud	sediment	aerobe	https://www.qiagen.com/us/cmp/ecom/powersoilkits?COECM_MOBIO_Branded_1707_SEA_PowerSoil__&kwid=%2Bpower%20%2Bsoil%20%2Brna	https://github.com/FranckLejzerowicz/protocols	TruSeq_Nano_PCR_free_Library_Preparation_Kit_single-end	uchime_4.2	TRUE	18	F1-Z	15-B	TGCTCTCAAAGGGCACCACAAGAACGC	AGATGATGCCACCTATCACACAATCATG	FWD:_{AAGGGCACCACAAGAACGC}_REV:_{CCACCTATCACACAATCATG}	F1-Z_15-B	TGCTCTCAAAGGGCACCACAAGAACGC_AGATGATGCCACCTATCACACAATCATG	AB02_37F_DNA_B_2_1	1717014	TruSeq	normalized	2016-05-20		Illumina	MiSeq	none	Lane_MiSeq_37F	40	86.68	4	46	initial_denaturation:95_5;_denaturation:_94_0.5;_annealing:52_0.2;_elongation:_72_1;_40_cycles;_final_elongation:72_2	11.1	3.6	39.96
37F.DNA.133.A	CCCTTGTT	CCCTTGTT	18S_rRNA	37F	37F	DNA	133	A	No	MIMARKS-survey	DSMP	gene|marine_metagenome|uncultured_microorganism|uncultured_organism|ecotype|biological_replicate|technical_replicate|interspecies_interaction_between_organisms	0	marine_abyssal_zone_biome	marine_oligotrophic_desert	mud	sediment	aerobe	https://www.qiagen.com/us/cmp/ecom/powersoilkits?COECM_MOBIO_Branded_1707_SEA_PowerSoil__&kwid=%2Bpower%20%2Bsoil%20%2Brna	https://github.com/FranckLejzerowicz/protocols	TruSeq_Nano_PCR_free_Library_Preparation_Kit_single-end	uchime_4.2	TRUE	17	F1-Z	15-K	TGCTCTCAAAGGGCACCACAAGAACGC	CATCGTACCCACCTATCACACAATCATG	FWD:_{AAGGGCACCACAAGAACGC}_REV:_{CCACCTATCACACAATCATG}	F1-Z_15-K	TGCTCTCAAAGGGCACCACAAGAACGC_CATCGTACCCACCTATCACACAATCATG	AB02_37F_DNA_A_2_1	1515177	TruSeq	normalized	2016-05-20		Illumina	MiSeq	none	Lane_MiSeq_37F	40	112.19	4	46	initial_denaturation:95_5;_denaturation:_94_0.5;_annealing:52_0.2;_elongation:_72_1;_40_cycles;_final_elongation:72_2	13.1	3.05	39.95
37F.DNA.133.B	CCCTTTCC	CCCTTTCC	18S_rRNA	37F	37F	DNA	133	B	No	MIMARKS-survey	DSMP	gene|marine_metagenome|uncultured_microorganism|uncultured_organism|ecotype|biological_replicate|technical_replicate|interspecies_interaction_between_organisms	0	marine_abyssal_zone_biome	marine_oligotrophic_desert	mud	sediment	aerobe	https://www.qiagen.com/us/cmp/ecom/powersoilkits?COECM_MOBIO_Branded_1707_SEA_PowerSoil__&kwid=%2Bpower%20%2Bsoil%20%2Brna	https://github.com/FranckLejzerowicz/protocols	TruSeq_Nano_PCR_free_Library_Preparation_Kit_single-end	uchime_4.2	TRUE	17	F1-Z	15-K	TGCTCTCAAAGGGCACCACAAGAACGC	CATCGTACCCACCTATCACACAATCATG	FWD:_{AAGGGCACCACAAGAACGC}_REV:_{CCACCTATCACACAATCATG}	F1-Z_15-K	TGCTCTCAAAGGGCACCACAAGAACGC_CATCGTACCCACCTATCACACAATCATG	AB02_37F_DNA_B_2_1	1717014	TruSeq	normalized	2016-05-20		Illumina	MiSeq	none	Lane_MiSeq_37F	40	86.68	4	46	initial_denaturation:95_5;_denaturation:_94_0.5;_annealing:52_0.2;_elongation:_72_1;_40_cycles;_final_elongation:72_2	13.1	3.05	39.95
37F.DNA.135.A	CCCTTTGC	CCCTTTGC	18S_rRNA	37F	37F	DNA	135	A	No	MIMARKS-survey	DSMP	gene|marine_metagenome|uncultured_microorganism|uncultured_organism|ecotype|biological_replicate|technical_replicate|interspecies_interaction_between_organisms	0	marine_abyssal_zone_biome	marine_oligotrophic_desert	mud	sediment	aerobe	https://www.qiagen.com/us/cmp/ecom/powersoilkits?COECM_MOBIO_Branded_1707_SEA_PowerSoil__&kwid=%2Bpower%20%2Bsoil%20%2Brna	https://github.com/FranckLejzerowicz/protocols	TruSeq_Nano_PCR_free_Library_Preparation_Kit_single-end	uchime_4.2	TRUE	17.7	F1-Z	15-W	TGCTCTCAAAGGGCACCACAAGAACGC	TGATATGCCCACCTATCACACAATCATG	FWD:_{AAGGGCACCACAAGAACGC}_REV:_{CCACCTATCACACAATCATG}	F1-Z_15-W	TGCTCTCAAAGGGCACCACAAGAACGC_TGATATGCCCACCTATCACACAATCATG	AB02_37F_DNA_A_2_1	1515177	TruSeq	normalized	2016-05-20		Illumina	MiSeq	none	Lane_MiSeq_37F	40	112.19	4	46	initial_denaturation:95_5;_denaturation:_94_0.5;_annealing:52_0.2;_elongation:_72_1;_40_cycles;_final_elongation:72_2	9.74	4.11	40.03
37F.DNA.135.B	CCCTTTGG	CCCTTTGG	18S_rRNA	37F	37F	DNA	135	B	No	MIMARKS-survey	DSMP	gene|marine_metagenome|uncultured_microorganism|uncultured_organism|ecotype|biological_replicate|technical_replicate|interspecies_interaction_between_organisms	0	marine_abyssal_zone_biome	marine_oligotrophic_desert	mud	sediment	aerobe	https://www.qiagen.com/us/cmp/ecom/powersoilkits?COECM_MOBIO_Branded_1707_SEA_PowerSoil__&kwid=%2Bpower%20%2Bsoil%20%2Brna	https://github.com/FranckLejzerowicz/protocols	TruSeq_Nano_PCR_free_Library_Preparation_Kit_single-end	uchime_4.2	TRUE	17.7	F1-Z	15-W	TGCTCTCAAAGGGCACCACAAGAACGC	TGATATGCCCACCTATCACACAATCATG	FWD:_{AAGGGCACCACAAGAACGC}_REV:_{CCACCTATCACACAATCATG}	F1-Z_15-W	TGCTCTCAAAGGGCACCACAAGAACGC_TGATATGCCCACCTATCACACAATCATG	AB02_37F_DNA_B_2_1	1717014	TruSeq	normalized	2016-05-20		Illumina	MiSeq	none	Lane_MiSeq_37F	40	86.68	4	46	initial_denaturation:95_5;_denaturation:_94_0.5;_annealing:52_0.2;_elongation:_72_1;_40_cycles;_final_elongation:72_2	9.74	4.11	40.03
37F.DNA.136.A	CCCTTTGT	CCCTTTGT	18S_rRNA	37F	37F	DNA	136	A	No	MIMARKS-survey	DSMP	gene|marine_metagenome|uncultured_microorganism|uncultured_organism|ecotype|biological_replicate|technical_replicate|interspecies_interaction_between_organisms	0	marine_abyssal_zone_biome	marine_oligotrophic_desert	mud	sediment	aerobe	https://www.qiagen.com/us/cmp/ecom/powersoilkits?COECM_MOBIO_Branded_1707_SEA_PowerSoil__&kwid=%2Bpower%20%2Bsoil%20%2Brna	https://github.com/FranckLejzerowicz/protocols	TruSeq_Nano_PCR_free_Library_Preparation_Kit_single-end	uchime_4.2	TRUE	11.4	F1-E	15-M	CAGTCGTAAAGGGCACCACAAGAACGC	CGACGAGCCCACCTATCACACAATCATG	FWD:_{AAGGGCACCACAAGAACGC}_REV:_{CCACCTATCACACAATCATG}	F1-E_15-M	CAGTCGTAAAGGGCACCACAAGAACGC_CGACGAGCCCACCTATCACACAATCATG	DSMP_37F_DNA_A_1_2	15316119	TruSeq	normalized	2017-07-04	TruSeq4	Illumina	HiSeq_2500	none	lane_pool37F	27	20.04	4	42	initial_denaturation:95_5;_denaturation:_94_0.5;_annealing:52_0.2;_elongation:_72_1;_40_cycles;_final_elongation:72_2	2.6	10.38	26.99
37F.DNA.136.B	CCCTTTTC	CCCTTTTC	18S_rRNA	37F	37F	DNA	136	B	No	MIMARKS-survey	DSMP	gene|marine_metagenome|uncultured_microorganism|uncultured_organism|ecotype|biological_replicate|technical_replicate|interspecies_interaction_between_organisms	0	marine_abyssal_zone_biome	marine_oligotrophic_desert	mud	sediment	aerobe	https://www.qiagen.com/us/cmp/ecom/powersoilkits?COECM_MOBIO_Branded_1707_SEA_PowerSoil__&kwid=%2Bpower%20%2Bsoil%20%2Brna	https://github.com/FranckLejzerowicz/protocols	TruSeq_Nano_PCR_free_Library_Preparation_Kit_single-end	uchime_4.2	TRUE	11.4	F1-E	15-M	CAGTCGTAAAGGGCACCACAAGAACGC	CGACGAGCCCACCTATCACACAATCATG	FWD:_{AAGGGCACCACAAGAACGC}_REV:_{CCACCTATCACACAATCATG}	F1-E_15-M	CAGTCGTAAAGGGCACCACAAGAACGC_CGACGAGCCCACCTATCACACAATCATG	DSMP_37F_DNA_B_1_1	2278945	TruSeq	normalized	2017-07-04	TruSeq8	Illumina	HiSeq_2500	none	lane_pool37F	40	337.28	4	42	initial_denaturation:95_5;_denaturation:_94_0.5;_annealing:52_0.2;_elongation:_72_1;_40_cycles;_final_elongation:72_2	2.7	14.81	39.99
37F.DNA.137.A	CCCTTTTG	CCCTTTTG	18S_rRNA	37F	37F	DNA	137	A	No	MIMARKS-survey	DSMP	gene|marine_metagenome|uncultured_microorganism|uncultured_organism|ecotype|biological_replicate|technical_replicate|interspecies_interaction_between_organisms	0	marine_abyssal_zone_biome	marine_oligotrophic_desert	mud	sediment	aerobe	https://www.qiagen.com/us/cmp/ecom/powersoilkits?COECM_MOBIO_Branded_1707_SEA_PowerSoil__&kwid=%2Bpower%20%2Bsoil%20%2Brna	https://github.com/FranckLejzerowicz/protocols	TruSeq_Nano_PCR_free_Library_Preparation_Kit_single-end	uchime_4.2	TRUE	21.5	F1-E	15-T	CAGTCGTAAAGGGCACCACAAGAACGC	TAGTGAGCCCACCTATCACACAATCATG	FWD:_{AAGGGCACCACAAGAACGC}_REV:_{CCACCTATCACACAATCATG}	F1-E_15-T	CAGTCGTAAAGGGCACCACAAGAACGC_TAGTGAGCCCACCTATCACACAATCATG	DSMP_37F_DNA_A_1_3	18703377	TruSeq	normalized	2017-07-04	TruSeq5	Illumina	HiSeq_2500	none	lane_pool37F	27.5	17.75	4	41	initial_denaturation:95_5;_denaturation:_94_0.5;_annealing:52_0.2;_elongation:_72_1;_40_cycles;_final_elongation:72_2	2.8	9.82	27.5
37F.DNA.137.B	CCCTTTTT	CCCTTTTT	18S_rRNA	37F	37F	DNA	137	B	No	MIMARKS-survey	DSMP	gene|marine_metagenome|uncultured_microorganism|uncultured_organism|ecotype|biological_replicate|technical_replicate|interspecies_interaction_between_organisms	0	marine_abyssal_zone_biome	marine_oligotrophic_desert	mud	sediment	aerobe	https://www.qiagen.com/us/cmp/ecom/powersoilkits?COECM_MOBIO_Branded_1707_SEA_PowerSoil__&kwid=%2Bpower%20%2Bsoil%20%2Brna	https://github.com/FranckLejzerowicz/protocols	TruSeq_Nano_PCR_free_Library_Preparation_Kit_single-end	uchime_4.2	TRUE	21.5	F1-E	15-T	CAGTCGTAAAGGGCACCACAAGAACGC	TAGTGAGCCCACCTATCACACAATCATG	FWD:_{AAGGGCACCACAAGAACGC}_REV:_{CCACCTATCACACAATCATG}	F1-E_15-T	CAGTCGTAAAGGGCACCACAAGAACGC_TAGTGAGCCCACCTATCACACAATCATG	DSMP_37F_DNA_B_1_1	2278945	TruSeq	normalized	2017-07-04	TruSeq8	Illumina	HiSeq_2500	none	lane_pool37F	40	337.28	4	42	initial_denaturation:95_5;_denaturation:_94_0.5;_annealing:52_0.2;_elongation:_72_1;_40_cycles;_final_elongation:72_2	2.5	16	40
37F.DNA.138.A	CCGCCCCC	CCGCCCCC	18S_rRNA	37F	37F	DNA	138	A	No	MIMARKS-survey	DSMP	gene|marine_metagenome|uncultured_microorganism|uncultured_organism|ecotype|biological_replicate|technical_replicate|interspecies_interaction_between_organisms	0	marine_abyssal_zone_biome	marine_oligotrophic_desert	mud	sediment	aerobe	https://www.qiagen.com/us/cmp/ecom/powersoilkits?COECM_MOBIO_Branded_1707_SEA_PowerSoil__&kwid=%2Bpower%20%2Bsoil%20%2Brna	https://github.com/FranckLejzerowicz/protocols	TruSeq_Nano_PCR_free_Library_Preparation_Kit_single-end	uchime_4.2	TRUE	19.3	F1-E	15-Z	CAGTCGTAAAGGGCACCACAAGAACGC	TGTGCATGCCACCTATCACACAATCATG	FWD:_{AAGGGCACCACAAGAACGC}_REV:_{CCACCTATCACACAATCATG}	F1-E_15-Z	CAGTCGTAAAGGGCACCACAAGAACGC_TGTGCATGCCACCTATCACACAATCATG	DSMP_37F_DNA_A_1_1	15294031	TruSeq	normalized	2017-07-04	TruSeq1	Illumina	HiSeq_2500	none	lane_pool37F	30	22.46	4	42	initial_denaturation:95_5;_denaturation:_94_0.5;_annealing:52_0.2;_elongation:_72_1;_40_cycles;_final_elongation:72_2	1.2	25	30
37F.DNA.138.B	CCGCCCCG	CCGCCCCG	18S_rRNA	37F	37F	DNA	138	B	No	MIMARKS-survey	DSMP	gene|marine_metagenome|uncultured_microorganism|uncultured_organism|ecotype|biological_replicate|technical_replicate|interspecies_interaction_between_organisms	0	marine_abyssal_zone_biome	marine_oligotrophic_desert	mud	sediment	aerobe	https://www.qiagen.com/us/cmp/ecom/powersoilkits?COECM_MOBIO_Branded_1707_SEA_PowerSoil__&kwid=%2Bpower%20%2Bsoil%20%2Brna	https://github.com/FranckLejzerowicz/protocols	TruSeq_Nano_PCR_free_Library_Preparation_Kit_single-end	uchime_4.2	TRUE	19.3	F1-E	15-Z	CAGTCGTAAAGGGCACCACAAGAACGC	TGTGCATGCCACCTATCACACAATCATG	FWD:_{AAGGGCACCACAAGAACGC}_REV:_{CCACCTATCACACAATCATG}	F1-E_15-Z	CAGTCGTAAAGGGCACCACAAGAACGC_TGTGCATGCCACCTATCACACAATCATG	DSMP_37F_DNA_B_1_3	1877212	TruSeq	normalized	2017-07-04	TruSeq10	Illumina	HiSeq_2500	none	lane_pool37F	40	535.96	4	41	initial_denaturation:95_5;_denaturation:_94_0.5;_annealing:52_0.2;_elongation:_72_1;_40_cycles;_final_elongation:72_2	1.1	50	55
37F.DNA.139.A	CCGCCCCT	CCGCCCCT	18S_rRNA	37F	37F	DNA	139	A	No	MIMARKS-survey	DSMP	gene|marine_metagenome|uncultured_microorganism|uncultured_organism|ecotype|biological_replicate|technical_replicate|interspecies_interaction_between_organisms	0	marine_abyssal_zone_biome	marine_oligotrophic_desert	mud	sediment	aerobe	https://www.qiagen.com/us/cmp/ecom/powersoilkits?COECM_MOBIO_Branded_1707_SEA_PowerSoil__&kwid=%2Bpower%20%2Bsoil%20%2Brna	https://github.com/FranckLejzerowicz/protocols	TruSeq_Nano_PCR_free_Library_Preparation_Kit_single-end	uchime_4.2	TRUE	34.2	F1-F	15-C	CGATCTACAAGGGCACCACAAGAACGC	AGTCGCGTCCACCTATCACACAATCATG	FWD:_{AAGGGCACCACAAGAACGC}_REV:_{CCACCTATCACACAATCATG}	F1-F_15-C	CGATCTACAAGGGCACCACAAGAACGC_AGTCGCGTCCACCTATCACACAATCATG	DSMP_37F_DNA_A_1_2	15316119	TruSeq	normalized	2017-07-04	TruSeq4	Illumina	HiSeq_2500	none	lane_pool37F	27	20.04	4	42	initial_denaturation:95_5;_denaturation:_94_0.5;_annealing:52_0.2;_elongation:_72_1;_40_cycles;_final_elongation:72_2	4.6	5.87	27
37F.DNA.139.B	CCGCCCGC	CCGCCCGC	18S_rRNA	37F	37F	DNA	139	B	No	MIMARKS-survey	DSMP	gene|marine_metagenome|uncultured_microorganism|uncultured_organism|ecotype|biological_replicate|technical_replicate|interspecies_interaction_between_organisms	0	marine_abyssal_zone_biome	marine_oligotrophic_desert	mud	sediment	aerobe	https://www.qiagen.com/us/cmp/ecom/powersoilkits?COECM_MOBIO_Branded_1707_SEA_PowerSoil__&kwid=%2Bpower%20%2Bsoil%20%2Brna	https://github.com/FranckLejzerowicz/protocols	TruSeq_Nano_PCR_free_Library_Preparation_Kit_single-end	uchime_4.2	TRUE	34.2	F1-F	15-C	CGATCTACAAGGGCACCACAAGAACGC	AGTCGCGTCCACCTATCACACAATCATG	FWD:_{AAGGGCACCACAAGAACGC}_REV:_{CCACCTATCACACAATCATG}	F1-F_15-C	CGATCTACAAGGGCACCACAAGAACGC_AGTCGCGTCCACCTATCACACAATCATG	DSMP_37F_DNA_B_1_3	1877212	TruSeq	normalized	2017-07-04	TruSeq10	Illumina	HiSeq_2500	none	lane_pool37F	40	535.96	4	41	initial_denaturation:95_5;_denaturation:_94_0.5;_annealing:52_0.2;_elongation:_72_1;_40_cycles;_final_elongation:72_2	5	8	40
37F.DNA.140.A	CCGCCCGG	CCGCCCGG	18S_rRNA	37F	37F	DNA	140	A	No	MIMARKS-survey	DSMP	gene|marine_metagenome|uncultured_microorganism|uncultured_organism|ecotype|biological_replicate|technical_replicate|interspecies_interaction_between_organisms	0	marine_abyssal_zone_biome	marine_oligotrophic_desert	mud	sediment	aerobe	https://www.qiagen.com/us/cmp/ecom/powersoilkits?COECM_MOBIO_Branded_1707_SEA_PowerSoil__&kwid=%2Bpower%20%2Bsoil%20%2Brna	https://github.com/FranckLejzerowicz/protocols	TruSeq_Nano_PCR_free_Library_Preparation_Kit_single-end	uchime_4.2	TRUE	39.6	F1-F	15-H	CGATCTACAAGGGCACCACAAGAACGC	ATGTCAGTCCACCTATCACACAATCATG	FWD:_{AAGGGCACCACAAGAACGC}_REV:_{CCACCTATCACACAATCATG}	F1-F_15-H	CGATCTACAAGGGCACCACAAGAACGC_ATGTCAGTCCACCTATCACACAATCATG	DSMP_37F_DNA_A_1_1	15294031	TruSeq	normalized	2017-07-04	TruSeq1	Illumina	HiSeq_2500	none	lane_pool37F	30	22.46	4	42	initial_denaturation:95_5;_denaturation:_94_0.5;_annealing:52_0.2;_elongation:_72_1;_40_cycles;_final_elongation:72_2	2.2	13.64	30.01
37F.DNA.140.B	CCGCCCGT	CCGCCCGT	18S_rRNA	37F	37F	DNA	140	B	No	MIMARKS-survey	DSMP	gene|marine_metagenome|uncultured_microorganism|uncultured_organism|ecotype|biological_replicate|technical_replicate|interspecies_interaction_between_organisms	0	marine_abyssal_zone_biome	marine_oligotrophic_desert	mud	sediment	aerobe	https://www.qiagen.com/us/cmp/ecom/powersoilkits?COECM_MOBIO_Branded_1707_SEA_PowerSoil__&kwid=%2Bpower%20%2Bsoil%20%2Brna	https://github.com/FranckLejzerowicz/protocols	TruSeq_Nano_PCR_free_Library_Preparation_Kit_single-end	uchime_4.2	TRUE	39.6	F1-F	15-H	CGATCTACAAGGGCACCACAAGAACGC	ATGTCAGTCCACCTATCACACAATCATG	FWD:_{AAGGGCACCACAAGAACGC}_REV:_{CCACCTATCACACAATCATG}	F1-F_15-H	CGATCTACAAGGGCACCACAAGAACGC_ATGTCAGTCCACCTATCACACAATCATG	DSMP_37F_DNA_B_1_2	2198874	TruSeq	normalized	2017-07-04	TruSeq9	Illumina	HiSeq_2500	none	lane_pool37F	40	307.78	4	42	initial_denaturation:95_5;_denaturation:_94_0.5;_annealing:52_0.2;_elongation:_72_1;_40_cycles;_final_elongation:72_2	6.9	5.8	40.02
37F.DNA.141.A	CCGCCCTC	CCGCCCTC	18S_rRNA	37F	37F	DNA	141	A	No	MIMARKS-survey	DSMP	gene|marine_metagenome|uncultured_microorganism|uncultured_organism|ecotype|biological_replicate|technical_replicate|interspecies_interaction_between_organisms	0	marine_abyssal_zone_biome	marine_oligotrophic_desert	mud	sediment	aerobe	https://www.qiagen.com/us/cmp/ecom/powersoilkits?COECM_MOBIO_Branded_1707_SEA_PowerSoil__&kwid=%2Bpower%20%2Bsoil%20%2Brna	https://github.com/FranckLejzerowicz/protocols	TruSeq_Nano_PCR_free_Library_Preparation_Kit_single-end	uchime_4.2	TRUE	32.5	F1-F	15-L	CGATCTACAAGGGCACCACAAGAACGC	CATGCAGTCCACCTATCACACAATCATG	FWD:_{AAGGGCACCACAAGAACGC}_REV:_{CCACCTATCACACAATCATG}	F1-F_15-L	CGATCTACAAGGGCACCACAAGAACGC_CATGCAGTCCACCTATCACACAATCATG	DSMP_37F_DNA_A_1_3	18703377	TruSeq	normalized	2017-07-04	TruSeq5	Illumina	HiSeq_2500	none	lane_pool37F	27.5	17.75	4	41	initial_denaturation:95_5;_denaturation:_94_0.5;_annealing:52_0.2;_elongation:_72_1;_40_cycles;_final_elongation:72_2	5.4	5.09	27.49
37F.DNA.141.B	CCGCCCTG	CCGCCCTG	18S_rRNA	37F	37F	DNA	141	B	No	MIMARKS-survey	DSMP	gene|marine_metagenome|uncultured_microorganism|uncultured_organism|ecotype|biological_replicate|technical_replicate|interspecies_interaction_between_organisms	0	marine_abyssal_zone_biome	marine_oligotrophic_desert	mud	sediment	aerobe	https://www.qiagen.com/us/cmp/ecom/powersoilkits?COECM_MOBIO_Branded_1707_SEA_PowerSoil__&kwid=%2Bpower%20%2Bsoil%20%2Brna	https://github.com/FranckLejzerowicz/protocols	TruSeq_Nano_PCR_free_Library_Preparation_Kit_single-end	uchime_4.2	TRUE	32.5	F1-F	15-L	CGATCTACAAGGGCACCACAAGAACGC	CATGCAGTCCACCTATCACACAATCATG	FWD:_{AAGGGCACCACAAGAACGC}_REV:_{CCACCTATCACACAATCATG}	F1-F_15-L	CGATCTACAAGGGCACCACAAGAACGC_CATGCAGTCCACCTATCACACAATCATG	DSMP_37F_DNA_B_1_2	2198874	TruSeq	normalized	2017-07-04	TruSeq9	Illumina	HiSeq_2500	none	lane_pool37F	40	307.78	4	42	initial_denaturation:95_5;_denaturation:_94_0.5;_annealing:52_0.2;_elongation:_72_1;_40_cycles;_final_elongation:72_2	4.2	9.52	39.98
37F.DNA.142.A	CCGCCCTT	CCGCCCTT	18S_rRNA	37F	37F	DNA	142	A	No	MIMARKS-survey	DSMP	gene|marine_metagenome|uncultured_microorganism|uncultured_organism|ecotype|biological_replicate|technical_replicate|interspecies_interaction_between_organisms	0	marine_abyssal_zone_biome	marine_oligotrophic_desert	mud	sediment	aerobe	https://www.qiagen.com/us/cmp/ecom/powersoilkits?COECM_MOBIO_Branded_1707_SEA_PowerSoil__&kwid=%2Bpower%20%2Bsoil%20%2Brna	https://github.com/FranckLejzerowicz/protocols	TruSeq_Nano_PCR_free_Library_Preparation_Kit_single-end	uchime_4.2	TRUE	18.1	F1-F	15-O	CGATCTACAAGGGCACCACAAGAACGC	CGAGCTAGCCACCTATCACACAATCATG	FWD:_{AAGGGCACCACAAGAACGC}_REV:_{CCACCTATCACACAATCATG}	F1-F_15-O	CGATCTACAAGGGCACCACAAGAACGC_CGAGCTAGCCACCTATCACACAATCATG	DSMP_37F_DNA_A_1_3	18703377	TruSeq	normalized	2017-07-04	TruSeq5	Illumina	HiSeq_2500	none	lane_pool37F	27.5	17.75	4	41	initial_denaturation:95_5;_denaturation:_94_0.5;_annealing:52_0.2;_elongation:_72_1;_40_cycles;_final_elongation:72_2	8	3.44	27.52
37F.DNA.143.A	CCGCCGCG	CCGCCGCG	18S_rRNA	37F	37F	DNA	143	A	No	MIMARKS-survey	DSMP	gene|marine_metagenome|uncultured_microorganism|uncultured_organism|ecotype|biological_replicate|technical_replicate|interspecies_interaction_between_organisms	0	marine_abyssal_zone_biome	marine_oligotrophic_desert	mud	sediment	aerobe	https://www.qiagen.com/us/cmp/ecom/powersoilkits?COECM_MOBIO_Branded_1707_SEA_PowerSoil__&kwid=%2Bpower%20%2Bsoil%20%2Brna	https://github.com/FranckLejzerowicz/protocols	TruSeq_Nano_PCR_free_Library_Preparation_Kit_single-end	uchime_4.2	TRUE	17.2	F1-F	15-Q	CGATCTACAAGGGCACCACAAGAACGC	CTGCACGCCCACCTATCACACAATCATG	FWD:_{AAGGGCACCACAAGAACGC}_REV:_{CCACCTATCACACAATCATG}	F1-F_15-Q	CGATCTACAAGGGCACCACAAGAACGC_CTGCACGCCCACCTATCACACAATCATG	DSMP_37F_DNA_A_1_1	15294031	TruSeq	normalized	2017-07-04	TruSeq1	Illumina	HiSeq_2500	none	lane_pool37F	30	22.46	4	42	initial_denaturation:95_5;_denaturation:_94_0.5;_annealing:52_0.2;_elongation:_72_1;_40_cycles;_final_elongation:72_2	7.2	4.17	30.02
37F.DNA.143.B	CCGCCGCT	CCGCCGCT	18S_rRNA	37F	37F	DNA	143	B	No	MIMARKS-survey	DSMP	gene|marine_metagenome|uncultured_microorganism|uncultured_organism|ecotype|biological_replicate|technical_replicate|interspecies_interaction_between_organisms	0	marine_abyssal_zone_biome	marine_oligotrophic_desert	mud	sediment	aerobe	https://www.qiagen.com/us/cmp/ecom/powersoilkits?COECM_MOBIO_Branded_1707_SEA_PowerSoil__&kwid=%2Bpower%20%2Bsoil%20%2Brna	https://github.com/FranckLejzerowicz/protocols	TruSeq_Nano_PCR_free_Library_Preparation_Kit_single-end	uchime_4.2	TRUE	17.2	F1-F	15-Q	CGATCTACAAGGGCACCACAAGAACGC	CTGCACGCCCACCTATCACACAATCATG	FWD:_{AAGGGCACCACAAGAACGC}_REV:_{CCACCTATCACACAATCATG}	F1-F_15-Q	CGATCTACAAGGGCACCACAAGAACGC_CTGCACGCCCACCTATCACACAATCATG	DSMP_37F_DNA_B_1_1	2278945	TruSeq	normalized	2017-07-04	TruSeq8	Illumina	HiSeq_2500	none	lane_pool37F	40	337.28	4	42	initial_denaturation:95_5;_denaturation:_94_0.5;_annealing:52_0.2;_elongation:_72_1;_40_cycles;_final_elongation:72_2	5.7	7.02	40.01
37F.DNA.144.A	CCGCCGGC	CCGCCGGC	18S_rRNA	37F	37F	DNA	144	A	No	MIMARKS-survey	DSMP	gene|marine_metagenome|uncultured_microorganism|uncultured_organism|ecotype|biological_replicate|technical_replicate|interspecies_interaction_between_organisms	0	marine_abyssal_zone_biome	marine_oligotrophic_desert	mud	sediment	aerobe	https://www.qiagen.com/us/cmp/ecom/powersoilkits?COECM_MOBIO_Branded_1707_SEA_PowerSoil__&kwid=%2Bpower%20%2Bsoil%20%2Brna	https://github.com/FranckLejzerowicz/protocols	TruSeq_Nano_PCR_free_Library_Preparation_Kit_single-end	uchime_4.2	TRUE	25.3	F1-F	15-U	CGATCTACAAGGGCACCACAAGAACGC	TATCGCTGCCACCTATCACACAATCATG	FWD:_{AAGGGCACCACAAGAACGC}_REV:_{CCACCTATCACACAATCATG}	F1-F_15-U	CGATCTACAAGGGCACCACAAGAACGC_TATCGCTGCCACCTATCACACAATCATG	DSMP_37F_DNA_A_1_2	15316119	TruSeq	normalized	2017-07-04	TruSeq4	Illumina	HiSeq_2500	none	lane_pool37F	27	20.04	4	42	initial_denaturation:95_5;_denaturation:_94_0.5;_annealing:52_0.2;_elongation:_72_1;_40_cycles;_final_elongation:72_2	2	13.5	27
37F.DNA.144.B	CCGCCGGG	CCGCCGGG	18S_rRNA	37F	37F	DNA	144	B	No	MIMARKS-survey	DSMP	gene|marine_metagenome|uncultured_microorganism|uncultured_organism|ecotype|biological_replicate|technical_replicate|interspecies_interaction_between_organisms	0	marine_abyssal_zone_biome	marine_oligotrophic_desert	mud	sediment	aerobe	https://www.qiagen.com/us/cmp/ecom/powersoilkits?COECM_MOBIO_Branded_1707_SEA_PowerSoil__&kwid=%2Bpower%20%2Bsoil%20%2Brna	https://github.com/FranckLejzerowicz/protocols	TruSeq_Nano_PCR_free_Library_Preparation_Kit_single-end	uchime_4.2	TRUE	25.3	F1-F	15-U	CGATCTACAAGGGCACCACAAGAACGC	TATCGCTGCCACCTATCACACAATCATG	FWD:_{AAGGGCACCACAAGAACGC}_REV:_{CCACCTATCACACAATCATG}	F1-F_15-U	CGATCTACAAGGGCACCACAAGAACGC_TATCGCTGCCACCTATCACACAATCATG	DSMP_37F_DNA_B_1_2	2198874	TruSeq	normalized	2017-07-04	TruSeq9	Illumina	HiSeq_2500	none	lane_pool37F	40	307.78	4	42	initial_denaturation:95_5;_denaturation:_94_0.5;_annealing:52_0.2;_elongation:_72_1;_40_cycles;_final_elongation:72_2	2.1	19.05	40.01
37F.DNA.145.A	CCGCCGGT	CCGCCGGT	18S_rRNA	37F	37F	DNA	145	A	No	MIMARKS-survey	DSMP	gene|marine_metagenome|uncultured_microorganism|uncultured_organism|ecotype|biological_replicate|technical_replicate|interspecies_interaction_between_organisms	0	marine_abyssal_zone_biome	marine_oligotrophic_desert	mud	sediment	aerobe	https://www.qiagen.com/us/cmp/ecom/powersoilkits?COECM_MOBIO_Branded_1707_SEA_PowerSoil__&kwid=%2Bpower%20%2Bsoil%20%2Brna	https://github.com/FranckLejzerowicz/protocols	TruSeq_Nano_PCR_free_Library_Preparation_Kit_single-end	uchime_4.2	TRUE	25.2	F1-G	15-B	CGATGACAAAGGGCACCACAAGAACGC	AGATGATGCCACCTATCACACAATCATG	FWD:_{AAGGGCACCACAAGAACGC}_REV:_{CCACCTATCACACAATCATG}	F1-G_15-B	CGATGACAAAGGGCACCACAAGAACGC_AGATGATGCCACCTATCACACAATCATG	DSMP_37F_DNA_A_1_3	18703377	TruSeq	normalized	2017-07-04	TruSeq5	Illumina	HiSeq_2500	none	lane_pool37F	27.5	17.75	4	41	initial_denaturation:95_5;_denaturation:_94_0.5;_annealing:52_0.2;_elongation:_72_1;_40_cycles;_final_elongation:72_2	1.68	16.37	27.5
37F.DNA.145.B	CCGCCGTC	CCGCCGTC	18S_rRNA	37F	37F	DNA	145	B	No	MIMARKS-survey	DSMP	gene|marine_metagenome|uncultured_microorganism|uncultured_organism|ecotype|biological_replicate|technical_replicate|interspecies_interaction_between_organisms	0	marine_abyssal_zone_biome	marine_oligotrophic_desert	mud	sediment	aerobe	https://www.qiagen.com/us/cmp/ecom/powersoilkits?COECM_MOBIO_Branded_1707_SEA_PowerSoil__&kwid=%2Bpower%20%2Bsoil%20%2Brna	https://github.com/FranckLejzerowicz/protocols	TruSeq_Nano_PCR_free_Library_Preparation_Kit_single-end	uchime_4.2	TRUE	25.2	F1-G	15-B	CGATGACAAAGGGCACCACAAGAACGC	AGATGATGCCACCTATCACACAATCATG	FWD:_{AAGGGCACCACAAGAACGC}_REV:_{CCACCTATCACACAATCATG}	F1-G_15-B	CGATGACAAAGGGCACCACAAGAACGC_AGATGATGCCACCTATCACACAATCATG	DSMP_37F_DNA_B_1_3	1877212	TruSeq	normalized	2017-07-04	TruSeq10	Illumina	HiSeq_2500	none	lane_pool37F	40	535.96	4	41	initial_denaturation:95_5;_denaturation:_94_0.5;_annealing:52_0.2;_elongation:_72_1;_40_cycles;_final_elongation:72_2	1.76	22.73	40
37F.DNA.146.A	CCGCCGTG	CCGCCGTG	18S_rRNA	37F	37F	DNA	146	A	No	MIMARKS-survey	DSMP	gene|marine_metagenome|uncultured_microorganism|uncultured_organism|ecotype|biological_replicate|technical_replicate|interspecies_interaction_between_organisms	0	marine_abyssal_zone_biome	marine_oligotrophic_desert	mud	sediment	aerobe	https://www.qiagen.com/us/cmp/ecom/powersoilkits?COECM_MOBIO_Branded_1707_SEA_PowerSoil__&kwid=%2Bpower%20%2Bsoil%20%2Brna	https://github.com/FranckLejzerowicz/protocols	TruSeq_Nano_PCR_free_Library_Preparation_Kit_single-end	uchime_4.2	TRUE	32	F1-G	15-F	CGATGACAAAGGGCACCACAAGAACGC	ATATCTACCCACCTATCACACAATCATG	FWD:_{AAGGGCACCACAAGAACGC}_REV:_{CCACCTATCACACAATCATG}	F1-G_15-F	CGATGACAAAGGGCACCACAAGAACGC_ATATCTACCCACCTATCACACAATCATG	DSMP_37F_DNA_A_1_1	15294031	TruSeq	normalized	2017-07-04	TruSeq1	Illumina	HiSeq_2500	none	lane_pool37F	30	22.46	4	42	initial_denaturation:95_5;_denaturation:_94_0.5;_annealing:52_0.2;_elongation:_72_1;_40_cycles;_final_elongation:72_2	1.6	18.75	30
37F.DNA.146.B	CCGCCGTT	CCGCCGTT	18S_rRNA	37F	37F	DNA	146	B	No	MIMARKS-survey	DSMP	gene|marine_metagenome|uncultured_microorganism|uncultured_organism|ecotype|biological_replicate|technical_replicate|interspecies_interaction_between_organisms	0	marine_abyssal_zone_biome	marine_oligotrophic_desert	mud	sediment	aerobe	https://www.qiagen.com/us/cmp/ecom/powersoilkits?COECM_MOBIO_Branded_1707_SEA_PowerSoil__&kwid=%2Bpower%20%2Bsoil%20%2Brna	https://github.com/FranckLejzerowicz/protocols	TruSeq_Nano_PCR_free_Library_Preparation_Kit_single-end	uchime_4.2	TRUE	32	F1-G	15-F	CGATGACAAAGGGCACCACAAGAACGC	ATATCTACCCACCTATCACACAATCATG	FWD:_{AAGGGCACCACAAGAACGC}_REV:_{CCACCTATCACACAATCATG}	F1-G_15-F	CGATGACAAAGGGCACCACAAGAACGC_ATATCTACCCACCTATCACACAATCATG	DSMP_37F_DNA_B_1_3	1877212	TruSeq	normalized	2017-07-04	TruSeq10	Illumina	HiSeq_2500	none	lane_pool37F	40	535.96	4	41	initial_denaturation:95_5;_denaturation:_94_0.5;_annealing:52_0.2;_elongation:_72_1;_40_cycles;_final_elongation:72_2	1.7	23.53	40
37F.DNA.147.A	CCGCCTCC	CCGCCTCC	18S_rRNA	37F	37F	DNA	147	A	No	MIMARKS-survey	DSMP	gene|marine_metagenome|uncultured_microorganism|uncultured_organism|ecotype|biological_replicate|technical_replicate|interspecies_interaction_between_organisms	0	marine_abyssal_zone_biome	marine_oligotrophic_desert	mud	sediment	aerobe	https://www.qiagen.com/us/cmp/ecom/powersoilkits?COECM_MOBIO_Branded_1707_SEA_PowerSoil__&kwid=%2Bpower%20%2Bsoil%20%2Brna	https://github.com/FranckLejzerowicz/protocols	TruSeq_Nano_PCR_free_Library_Preparation_Kit_single-end	uchime_4.2	TRUE	27.1	F1-G	15-N	CGATGACAAAGGGCACCACAAGAACGC	CGAGACGTCCACCTATCACACAATCATG	FWD:_{AAGGGCACCACAAGAACGC}_REV:_{CCACCTATCACACAATCATG}	F1-G_15-N	CGATGACAAAGGGCACCACAAGAACGC_CGAGACGTCCACCTATCACACAATCATG	DSMP_37F_DNA_A_1_1	15294031	TruSeq	normalized	2017-07-04	TruSeq1	Illumina	HiSeq_2500	none	lane_pool37F	30	22.46	4	42	initial_denaturation:95_5;_denaturation:_94_0.5;_annealing:52_0.2;_elongation:_72_1;_40_cycles;_final_elongation:72_2	6.4	4.69	30.02
37F.DNA.147.B	CCGCCTCG	CCGCCTCG	18S_rRNA	37F	37F	DNA	147	B	No	MIMARKS-survey	DSMP	gene|marine_metagenome|uncultured_microorganism|uncultured_organism|ecotype|biological_replicate|technical_replicate|interspecies_interaction_between_organisms	0	marine_abyssal_zone_biome	marine_oligotrophic_desert	mud	sediment	aerobe	https://www.qiagen.com/us/cmp/ecom/powersoilkits?COECM_MOBIO_Branded_1707_SEA_PowerSoil__&kwid=%2Bpower%20%2Bsoil%20%2Brna	https://github.com/FranckLejzerowicz/protocols	TruSeq_Nano_PCR_free_Library_Preparation_Kit_single-end	uchime_4.2	TRUE	27.1	F1-G	15-N	CGATGACAAAGGGCACCACAAGAACGC	CGAGACGTCCACCTATCACACAATCATG	FWD:_{AAGGGCACCACAAGAACGC}_REV:_{CCACCTATCACACAATCATG}	F1-G_15-N	CGATGACAAAGGGCACCACAAGAACGC_CGAGACGTCCACCTATCACACAATCATG	DSMP_37F_DNA_B_1_1	2278945	TruSeq	normalized	2017-07-04	TruSeq8	Illumina	HiSeq_2500	none	lane_pool37F	40	337.28	4	42	initial_denaturation:95_5;_denaturation:_94_0.5;_annealing:52_0.2;_elongation:_72_1;_40_cycles;_final_elongation:72_2	7.2	5.56	40.03
37F.DNA.148.B	CCGCCTGC	CCGCCTGC	18S_rRNA	37F	37F	DNA	148	B	No	MIMARKS-survey	DSMP	gene|marine_metagenome|uncultured_microorganism|uncultured_organism|ecotype|biological_replicate|technical_replicate|interspecies_interaction_between_organisms	0	marine_abyssal_zone_biome	marine_oligotrophic_desert	mud	sediment	aerobe	https://www.qiagen.com/us/cmp/ecom/powersoilkits?COECM_MOBIO_Branded_1707_SEA_PowerSoil__&kwid=%2Bpower%20%2Bsoil%20%2Brna	https://github.com/FranckLejzerowicz/protocols	TruSeq_Nano_PCR_free_Library_Preparation_Kit_single-end	uchime_4.2	TRUE	35.4	F1-G	15-P	CGATGACAAAGGGCACCACAAGAACGC	CTAGCATCCCACCTATCACACAATCATG	FWD:_{AAGGGCACCACAAGAACGC}_REV:_{CCACCTATCACACAATCATG}	F1-G_15-P	CGATGACAAAGGGCACCACAAGAACGC_CTAGCATCCCACCTATCACACAATCATG	DSMP_37F_DNA_B_1_2	2198874	TruSeq	normalized	2017-07-04	TruSeq9	Illumina	HiSeq_2500	none	lane_pool37F	40	307.78	4	42	initial_denaturation:95_5;_denaturation:_94_0.5;_annealing:52_0.2;_elongation:_72_1;_40_cycles;_final_elongation:72_2	0.52	50	26
37F.DNA.150.A	CCGCCTTC	CCGCCTTC	18S_rRNA	37F	37F	DNA	150	A	No	MIMARKS-survey	DSMP	gene|marine_metagenome|uncultured_microorganism|uncultured_organism|ecotype|biological_replicate|technical_replicate|interspecies_interaction_between_organisms	0	marine_abyssal_zone_biome	marine_oligotrophic_desert	mud	sediment	aerobe	https://www.qiagen.com/us/cmp/ecom/powersoilkits?COECM_MOBIO_Branded_1707_SEA_PowerSoil__&kwid=%2Bpower%20%2Bsoil%20%2Brna	https://github.com/FranckLejzerowicz/protocols	TruSeq_Nano_PCR_free_Library_Preparation_Kit_single-end	uchime_4.2	TRUE	44.1	F1-G	15-X	CGATGACAAAGGGCACCACAAGAACGC	TGATGCATCCACCTATCACACAATCATG	FWD:_{AAGGGCACCACAAGAACGC}_REV:_{CCACCTATCACACAATCATG}	F1-G_15-X	CGATGACAAAGGGCACCACAAGAACGC_TGATGCATCCACCTATCACACAATCATG	DSMP_37F_DNA_A_1_2	15316119	TruSeq	normalized	2017-07-04	TruSeq4	Illumina	HiSeq_2500	none	lane_pool37F	27	20.04	4	42	initial_denaturation:95_5;_denaturation:_94_0.5;_annealing:52_0.2;_elongation:_72_1;_40_cycles;_final_elongation:72_2	1.3	20.77	27
37F.DNA.150.B	CCGCCTTG	CCGCCTTG	18S_rRNA	37F	37F	DNA	150	B	No	MIMARKS-survey	DSMP	gene|marine_metagenome|uncultured_microorganism|uncultured_organism|ecotype|biological_replicate|technical_replicate|interspecies_interaction_between_organisms	0	marine_abyssal_zone_biome	marine_oligotrophic_desert	mud	sediment	aerobe	https://www.qiagen.com/us/cmp/ecom/powersoilkits?COECM_MOBIO_Branded_1707_SEA_PowerSoil__&kwid=%2Bpower%20%2Bsoil%20%2Brna	https://github.com/FranckLejzerowicz/protocols	TruSeq_Nano_PCR_free_Library_Preparation_Kit_single-end	uchime_4.2	TRUE	44.1	F1-G	15-X	CGATGACAAAGGGCACCACAAGAACGC	TGATGCATCCACCTATCACACAATCATG	FWD:_{AAGGGCACCACAAGAACGC}_REV:_{CCACCTATCACACAATCATG}	F1-G_15-X	CGATGACAAAGGGCACCACAAGAACGC_TGATGCATCCACCTATCACACAATCATG	DSMP_37F_DNA_B_1_1	2278945	TruSeq	normalized	2017-07-04	TruSeq8	Illumina	HiSeq_2500	none	lane_pool37F	40	337.28	4	42	initial_denaturation:95_5;_denaturation:_94_0.5;_annealing:52_0.2;_elongation:_72_1;_40_cycles;_final_elongation:72_2	1.1	50	55
37F.DNA.151.A	CCGCCTTT	CCGCCTTT	18S_rRNA	37F	37F	DNA	151	A	No	MIMARKS-survey	DSMP	gene|marine_metagenome|uncultured_microorganism|uncultured_organism|ecotype|biological_replicate|technical_replicate|interspecies_interaction_between_organisms	0	marine_abyssal_zone_biome	marine_oligotrophic_desert	mud	sediment	aerobe	https://www.qiagen.com/us/cmp/ecom/powersoilkits?COECM_MOBIO_Branded_1707_SEA_PowerSoil__&kwid=%2Bpower%20%2Bsoil%20%2Brna	https://github.com/FranckLejzerowicz/protocols	TruSeq_Nano_PCR_free_Library_Preparation_Kit_single-end	uchime_4.2	TRUE	73.9	F1-H	15-E	CGCACGTCAAGGGCACCACAAGAACGC	ATAGACTGCCACCTATCACACAATCATG	FWD:_{AAGGGCACCACAAGAACGC}_REV:_{CCACCTATCACACAATCATG}	F1-H_15-E	CGCACGTCAAGGGCACCACAAGAACGC_ATAGACTGCCACCTATCACACAATCATG	DSMP_37F_DNA_A_1_1	15294031	TruSeq	normalized	2017-07-04	TruSeq1	Illumina	HiSeq_2500	none	lane_pool37F	30	22.46	4	42	initial_denaturation:95_5;_denaturation:_94_0.5;_annealing:52_0.2;_elongation:_72_1;_40_cycles;_final_elongation:72_2	2.4	12.5	30
37F.DNA.151.B	CCGCGCCC	CCGCGCCC	18S_rRNA	37F	37F	DNA	151	B	No	MIMARKS-survey	DSMP	gene|marine_metagenome|uncultured_microorganism|uncultured_organism|ecotype|biological_replicate|technical_replicate|interspecies_interaction_between_organisms	0	marine_abyssal_zone_biome	marine_oligotrophic_desert	mud	sediment	aerobe	https://www.qiagen.com/us/cmp/ecom/powersoilkits?COECM_MOBIO_Branded_1707_SEA_PowerSoil__&kwid=%2Bpower%20%2Bsoil%20%2Brna	https://github.com/FranckLejzerowicz/protocols	TruSeq_Nano_PCR_free_Library_Preparation_Kit_single-end	uchime_4.2	TRUE	73.9	F1-H	15-E	CGCACGTCAAGGGCACCACAAGAACGC	ATAGACTGCCACCTATCACACAATCATG	FWD:_{AAGGGCACCACAAGAACGC}_REV:_{CCACCTATCACACAATCATG}	F1-H_15-E	CGCACGTCAAGGGCACCACAAGAACGC_ATAGACTGCCACCTATCACACAATCATG	DSMP_37F_DNA_B_1_1	2278945	TruSeq	normalized	2017-07-04	TruSeq8	Illumina	HiSeq_2500	none	lane_pool37F	40	337.28	4	42	initial_denaturation:95_5;_denaturation:_94_0.5;_annealing:52_0.2;_elongation:_72_1;_40_cycles;_final_elongation:72_2	0.88	50	44
37F.DNA.153.A	CCGCGCCG	CCGCGCCG	18S_rRNA	37F	37F	DNA	153	A	No	MIMARKS-survey	DSMP	gene|marine_metagenome|uncultured_microorganism|uncultured_organism|ecotype|biological_replicate|technical_replicate|interspecies_interaction_between_organisms	0	marine_abyssal_zone_biome	marine_oligotrophic_desert	mud	sediment	aerobe	https://www.qiagen.com/us/cmp/ecom/powersoilkits?COECM_MOBIO_Branded_1707_SEA_PowerSoil__&kwid=%2Bpower%20%2Bsoil%20%2Brna	https://github.com/FranckLejzerowicz/protocols	TruSeq_Nano_PCR_free_Library_Preparation_Kit_single-end	uchime_4.2	TRUE	181	F1-H	15-I	CGCACGTCAAGGGCACCACAAGAACGC	ATGTGCTCCCACCTATCACACAATCATG	FWD:_{AAGGGCACCACAAGAACGC}_REV:_{CCACCTATCACACAATCATG}	F1-H_15-I	CGCACGTCAAGGGCACCACAAGAACGC_ATGTGCTCCCACCTATCACACAATCATG	DSMP_37F_DNA_A_1_3	18703377	TruSeq	normalized	2017-07-04	TruSeq5	Illumina	HiSeq_2500	none	lane_pool37F	27.5	17.75	4	41	initial_denaturation:95_5;_denaturation:_94_0.5;_annealing:52_0.2;_elongation:_72_1;_40_cycles;_final_elongation:72_2	3	9.17	27.51
37F.DNA.153.B	CCGCGCCT	CCGCGCCT	18S_rRNA	37F	37F	DNA	153	B	No	MIMARKS-survey	DSMP	gene|marine_metagenome|uncultured_microorganism|uncultured_organism|ecotype|biological_replicate|technical_replicate|interspecies_interaction_between_organisms	0	marine_abyssal_zone_biome	marine_oligotrophic_desert	mud	sediment	aerobe	https://www.qiagen.com/us/cmp/ecom/powersoilkits?COECM_MOBIO_Branded_1707_SEA_PowerSoil__&kwid=%2Bpower%20%2Bsoil%20%2Brna	https://github.com/FranckLejzerowicz/protocols	TruSeq_Nano_PCR_free_Library_Preparation_Kit_single-end	uchime_4.2	TRUE	181	F1-H	15-I	CGCACGTCAAGGGCACCACAAGAACGC	ATGTGCTCCCACCTATCACACAATCATG	FWD:_{AAGGGCACCACAAGAACGC}_REV:_{CCACCTATCACACAATCATG}	F1-H_15-I	CGCACGTCAAGGGCACCACAAGAACGC_ATGTGCTCCCACCTATCACACAATCATG	DSMP_37F_DNA_B_1_3	1877212	TruSeq	normalized	2017-07-04	TruSeq10	Illumina	HiSeq_2500	none	lane_pool37F	40	535.96	4	41	initial_denaturation:95_5;_denaturation:_94_0.5;_annealing:52_0.2;_elongation:_72_1;_40_cycles;_final_elongation:72_2	1.36	50	68
37F.DNA.154.A	CCGCGCGC	CCGCGCGC	18S_rRNA	37F	37F	DNA	154	A	No	MIMARKS-survey	DSMP	gene|marine_metagenome|uncultured_microorganism|uncultured_organism|ecotype|biological_replicate|technical_replicate|interspecies_interaction_between_organisms	0	marine_abyssal_zone_biome	marine_oligotrophic_desert	mud	sediment	aerobe	https://www.qiagen.com/us/cmp/ecom/powersoilkits?COECM_MOBIO_Branded_1707_SEA_PowerSoil__&kwid=%2Bpower%20%2Bsoil%20%2Brna	https://github.com/FranckLejzerowicz/protocols	TruSeq_Nano_PCR_free_Library_Preparation_Kit_single-end	uchime_4.2	TRUE	25.8	F1-H	15-T	CGCACGTCAAGGGCACCACAAGAACGC	TAGTGAGCCCACCTATCACACAATCATG	FWD:_{AAGGGCACCACAAGAACGC}_REV:_{CCACCTATCACACAATCATG}	F1-H_15-T	CGCACGTCAAGGGCACCACAAGAACGC_TAGTGAGCCCACCTATCACACAATCATG	DSMP_37F_DNA_A_1_1	15294031	TruSeq	normalized	2017-07-04	TruSeq1	Illumina	HiSeq_2500	none	lane_pool37F	30	22.46	4	42	initial_denaturation:95_5;_denaturation:_94_0.5;_annealing:52_0.2;_elongation:_72_1;_40_cycles;_final_elongation:72_2	2.2	13.64	30.01
37F.DNA.154.B	CCGCGCGG	CCGCGCGG	18S_rRNA	37F	37F	DNA	154	B	No	MIMARKS-survey	DSMP	gene|marine_metagenome|uncultured_microorganism|uncultured_organism|ecotype|biological_replicate|technical_replicate|interspecies_interaction_between_organisms	0	marine_abyssal_zone_biome	marine_oligotrophic_desert	mud	sediment	aerobe	https://www.qiagen.com/us/cmp/ecom/powersoilkits?COECM_MOBIO_Branded_1707_SEA_PowerSoil__&kwid=%2Bpower%20%2Bsoil%20%2Brna	https://github.com/FranckLejzerowicz/protocols	TruSeq_Nano_PCR_free_Library_Preparation_Kit_single-end	uchime_4.2	TRUE	25.8	F1-H	15-T	CGCACGTCAAGGGCACCACAAGAACGC	TAGTGAGCCCACCTATCACACAATCATG	FWD:_{AAGGGCACCACAAGAACGC}_REV:_{CCACCTATCACACAATCATG}	F1-H_15-T	CGCACGTCAAGGGCACCACAAGAACGC_TAGTGAGCCCACCTATCACACAATCATG	DSMP_37F_DNA_B_1_2	2198874	TruSeq	normalized	2017-07-04	TruSeq9	Illumina	HiSeq_2500	none	lane_pool37F	40	307.78	4	42	initial_denaturation:95_5;_denaturation:_94_0.5;_annealing:52_0.2;_elongation:_72_1;_40_cycles;_final_elongation:72_2	2.1	19.05	40.01
37F.DNA.155.A	CCGCGCGT	CCGCGCGT	18S_rRNA	37F	37F	DNA	155	A	No	MIMARKS-survey	DSMP	gene|marine_metagenome|uncultured_microorganism|uncultured_organism|ecotype|biological_replicate|technical_replicate|interspecies_interaction_between_organisms	0	marine_abyssal_zone_biome	marine_oligotrophic_desert	mud	sediment	aerobe	https://www.qiagen.com/us/cmp/ecom/powersoilkits?COECM_MOBIO_Branded_1707_SEA_PowerSoil__&kwid=%2Bpower%20%2Bsoil%20%2Brna	https://github.com/FranckLejzerowicz/protocols	TruSeq_Nano_PCR_free_Library_Preparation_Kit_single-end	uchime_4.2	TRUE	10.7	F1-H	15-V	CGCACGTCAAGGGCACCACAAGAACGC	TATGACATCCACCTATCACACAATCATG	FWD:_{AAGGGCACCACAAGAACGC}_REV:_{CCACCTATCACACAATCATG}	F1-H_15-V	CGCACGTCAAGGGCACCACAAGAACGC_TATGACATCCACCTATCACACAATCATG	DSMP_37F_DNA_A_1_2	15316119	TruSeq	normalized	2017-07-04	TruSeq4	Illumina	HiSeq_2500	none	lane_pool37F	27	20.04	4	42	initial_denaturation:95_5;_denaturation:_94_0.5;_annealing:52_0.2;_elongation:_72_1;_40_cycles;_final_elongation:72_2	0.92	50	46
37F.DNA.155.B	CCGCGCTC	CCGCGCTC	18S_rRNA	37F	37F	DNA	155	B	No	MIMARKS-survey	DSMP	gene|marine_metagenome|uncultured_microorganism|uncultured_organism|ecotype|biological_replicate|technical_replicate|interspecies_interaction_between_organisms	0	marine_abyssal_zone_biome	marine_oligotrophic_desert	mud	sediment	aerobe	https://www.qiagen.com/us/cmp/ecom/powersoilkits?COECM_MOBIO_Branded_1707_SEA_PowerSoil__&kwid=%2Bpower%20%2Bsoil%20%2Brna	https://github.com/FranckLejzerowicz/protocols	TruSeq_Nano_PCR_free_Library_Preparation_Kit_single-end	uchime_4.2	TRUE	10.7	F1-H	15-V	CGCACGTCAAGGGCACCACAAGAACGC	TATGACATCCACCTATCACACAATCATG	FWD:_{AAGGGCACCACAAGAACGC}_REV:_{CCACCTATCACACAATCATG}	F1-H_15-V	CGCACGTCAAGGGCACCACAAGAACGC_TATGACATCCACCTATCACACAATCATG	DSMP_37F_DNA_B_1_2	2198874	TruSeq	normalized	2017-07-04	TruSeq9	Illumina	HiSeq_2500	none	lane_pool37F	40	307.78	4	42	initial_denaturation:95_5;_denaturation:_94_0.5;_annealing:52_0.2;_elongation:_72_1;_40_cycles;_final_elongation:72_2	1.04	50	52
37F.DNA.157.A	CCGCGCTG	CCGCGCTG	18S_rRNA	37F	37F	DNA	157	A	No	MIMARKS-survey	DSMP	gene|marine_metagenome|uncultured_microorganism|uncultured_organism|ecotype|biological_replicate|technical_replicate|interspecies_interaction_between_organisms	0	marine_abyssal_zone_biome	marine_oligotrophic_desert	mud	sediment	aerobe	https://www.qiagen.com/us/cmp/ecom/powersoilkits?COECM_MOBIO_Branded_1707_SEA_PowerSoil__&kwid=%2Bpower%20%2Bsoil%20%2Brna	https://github.com/FranckLejzerowicz/protocols	TruSeq_Nano_PCR_free_Library_Preparation_Kit_single-end	uchime_4.2	TRUE	191	F1-I	15-A	GACTGTATAAGGGCACCACAAGAACGC	AGACACACCCACCTATCACACAATCATG	FWD:_{AAGGGCACCACAAGAACGC}_REV:_{CCACCTATCACACAATCATG}	F1-I_15-A	GACTGTATAAGGGCACCACAAGAACGC_AGACACACCCACCTATCACACAATCATG	DSMP_37F_DNA_A_1_1	15294031	TruSeq	normalized	2017-07-04	TruSeq1	Illumina	HiSeq_2500	none	lane_pool37F	30	22.46	4	42	initial_denaturation:95_5;_denaturation:_94_0.5;_annealing:52_0.2;_elongation:_72_1;_40_cycles;_final_elongation:72_2	3.4	8.82	29.99
37F.DNA.157.B	CCGCGCTT	CCGCGCTT	18S_rRNA	37F	37F	DNA	157	B	No	MIMARKS-survey	DSMP	gene|marine_metagenome|uncultured_microorganism|uncultured_organism|ecotype|biological_replicate|technical_replicate|interspecies_interaction_between_organisms	0	marine_abyssal_zone_biome	marine_oligotrophic_desert	mud	sediment	aerobe	https://www.qiagen.com/us/cmp/ecom/powersoilkits?COECM_MOBIO_Branded_1707_SEA_PowerSoil__&kwid=%2Bpower%20%2Bsoil%20%2Brna	https://github.com/FranckLejzerowicz/protocols	TruSeq_Nano_PCR_free_Library_Preparation_Kit_single-end	uchime_4.2	TRUE	191	F1-I	15-A	GACTGTATAAGGGCACCACAAGAACGC	AGACACACCCACCTATCACACAATCATG	FWD:_{AAGGGCACCACAAGAACGC}_REV:_{CCACCTATCACACAATCATG}	F1-I_15-A	GACTGTATAAGGGCACCACAAGAACGC_AGACACACCCACCTATCACACAATCATG	DSMP_37F_DNA_B_1_1	2278945	TruSeq	normalized	2017-07-04	TruSeq8	Illumina	HiSeq_2500	none	lane_pool37F	40	337.28	4	42	initial_denaturation:95_5;_denaturation:_94_0.5;_annealing:52_0.2;_elongation:_72_1;_40_cycles;_final_elongation:72_2	3.5	11.43	40
37F.DNA.158.A	CCGCGGCC	CCGCGGCC	18S_rRNA	37F	37F	DNA	158	A	No	MIMARKS-survey	DSMP	gene|marine_metagenome|uncultured_microorganism|uncultured_organism|ecotype|biological_replicate|technical_replicate|interspecies_interaction_between_organisms	0	marine_abyssal_zone_biome	marine_oligotrophic_desert	mud	sediment	aerobe	https://www.qiagen.com/us/cmp/ecom/powersoilkits?COECM_MOBIO_Branded_1707_SEA_PowerSoil__&kwid=%2Bpower%20%2Bsoil%20%2Brna	https://github.com/FranckLejzerowicz/protocols	TruSeq_Nano_PCR_free_Library_Preparation_Kit_single-end	uchime_4.2	TRUE	15.8	F1-I	15-J	GACTGTATAAGGGCACCACAAGAACGC	CAGTGCAGCCACCTATCACACAATCATG	FWD:_{AAGGGCACCACAAGAACGC}_REV:_{CCACCTATCACACAATCATG}	F1-I_15-J	GACTGTATAAGGGCACCACAAGAACGC_CAGTGCAGCCACCTATCACACAATCATG	DSMP_37F_DNA_A_1_1	15294031	TruSeq	normalized	2017-07-04	TruSeq1	Illumina	HiSeq_2500	none	lane_pool37F	30	22.46	4	42	initial_denaturation:95_5;_denaturation:_94_0.5;_annealing:52_0.2;_elongation:_72_1;_40_cycles;_final_elongation:72_2	4.8	6.25	30
37F.DNA.158.B	CCGCGGCG	CCGCGGCG	18S_rRNA	37F	37F	DNA	158	B	No	MIMARKS-survey	DSMP	gene|marine_metagenome|uncultured_microorganism|uncultured_organism|ecotype|biological_replicate|technical_replicate|interspecies_interaction_between_organisms	0	marine_abyssal_zone_biome	marine_oligotrophic_desert	mud	sediment	aerobe	https://www.qiagen.com/us/cmp/ecom/powersoilkits?COECM_MOBIO_Branded_1707_SEA_PowerSoil__&kwid=%2Bpower%20%2Bsoil%20%2Brna	https://github.com/FranckLejzerowicz/protocols	TruSeq_Nano_PCR_free_Library_Preparation_Kit_single-end	uchime_4.2	TRUE	15.8	F1-I	15-J	GACTGTATAAGGGCACCACAAGAACGC	CAGTGCAGCCACCTATCACACAATCATG	FWD:_{AAGGGCACCACAAGAACGC}_REV:_{CCACCTATCACACAATCATG}	F1-I_15-J	GACTGTATAAGGGCACCACAAGAACGC_CAGTGCAGCCACCTATCACACAATCATG	DSMP_37F_DNA_B_1_1	2278945	TruSeq	normalized	2017-07-04	TruSeq8	Illumina	HiSeq_2500	none	lane_pool37F	40	337.28	4	42	initial_denaturation:95_5;_denaturation:_94_0.5;_annealing:52_0.2;_elongation:_72_1;_40_cycles;_final_elongation:72_2	10.2	3.92	39.98
37F.DNA.159.A	CCGCGGCT	CCGCGGCT	18S_rRNA	37F	37F	DNA	159	A	No	MIMARKS-survey	DSMP	gene|marine_metagenome|uncultured_microorganism|uncultured_organism|ecotype|biological_replicate|technical_replicate|interspecies_interaction_between_organisms	0	marine_abyssal_zone_biome	marine_oligotrophic_desert	mud	sediment	aerobe	https://www.qiagen.com/us/cmp/ecom/powersoilkits?COECM_MOBIO_Branded_1707_SEA_PowerSoil__&kwid=%2Bpower%20%2Bsoil%20%2Brna	https://github.com/FranckLejzerowicz/protocols	TruSeq_Nano_PCR_free_Library_Preparation_Kit_single-end	uchime_4.2	TRUE	23.2	F1-I	15-K	GACTGTATAAGGGCACCACAAGAACGC	CATCGTACCCACCTATCACACAATCATG	FWD:_{AAGGGCACCACAAGAACGC}_REV:_{CCACCTATCACACAATCATG}	F1-I_15-K	GACTGTATAAGGGCACCACAAGAACGC_CATCGTACCCACCTATCACACAATCATG	DSMP_37F_DNA_A_1_2	15316119	TruSeq	normalized	2017-07-04	TruSeq4	Illumina	HiSeq_2500	none	lane_pool37F	27	20.04	4	42	initial_denaturation:95_5;_denaturation:_94_0.5;_annealing:52_0.2;_elongation:_72_1;_40_cycles;_final_elongation:72_2	6	4.5	27
37F.DNA.159.B	CCGCGGGC	CCGCGGGC	18S_rRNA	37F	37F	DNA	159	B	No	MIMARKS-survey	DSMP	gene|marine_metagenome|uncultured_microorganism|uncultured_organism|ecotype|biological_replicate|technical_replicate|interspecies_interaction_between_organisms	0	marine_abyssal_zone_biome	marine_oligotrophic_desert	mud	sediment	aerobe	https://www.qiagen.com/us/cmp/ecom/powersoilkits?COECM_MOBIO_Branded_1707_SEA_PowerSoil__&kwid=%2Bpower%20%2Bsoil%20%2Brna	https://github.com/FranckLejzerowicz/protocols	TruSeq_Nano_PCR_free_Library_Preparation_Kit_single-end	uchime_4.2	TRUE	23.2	F1-I	15-K	GACTGTATAAGGGCACCACAAGAACGC	CATCGTACCCACCTATCACACAATCATG	FWD:_{AAGGGCACCACAAGAACGC}_REV:_{CCACCTATCACACAATCATG}	F1-I_15-K	GACTGTATAAGGGCACCACAAGAACGC_CATCGTACCCACCTATCACACAATCATG	DSMP_37F_DNA_B_1_3	1877212	TruSeq	normalized	2017-07-04	TruSeq10	Illumina	HiSeq_2500	none	lane_pool37F	40	535.96	4	41	initial_denaturation:95_5;_denaturation:_94_0.5;_annealing:52_0.2;_elongation:_72_1;_40_cycles;_final_elongation:72_2	7.2	5.56	40.03
37F.DNA.160.A	CCGCGGGG	CCGCGGGG	18S_rRNA	37F	37F	DNA	160	A	No	MIMARKS-survey	DSMP	gene|marine_metagenome|uncultured_microorganism|uncultured_organism|ecotype|biological_replicate|technical_replicate|interspecies_interaction_between_organisms	0	marine_abyssal_zone_biome	marine_oligotrophic_desert	mud	sediment	aerobe	https://www.qiagen.com/us/cmp/ecom/powersoilkits?COECM_MOBIO_Branded_1707_SEA_PowerSoil__&kwid=%2Bpower%20%2Bsoil%20%2Brna	https://github.com/FranckLejzerowicz/protocols	TruSeq_Nano_PCR_free_Library_Preparation_Kit_single-end	uchime_4.2	TRUE	19.2	F1-I	15-M	GACTGTATAAGGGCACCACAAGAACGC	CGACGAGCCCACCTATCACACAATCATG	FWD:_{AAGGGCACCACAAGAACGC}_REV:_{CCACCTATCACACAATCATG}	F1-I_15-M	GACTGTATAAGGGCACCACAAGAACGC_CGACGAGCCCACCTATCACACAATCATG	DSMP_37F_DNA_A_1_1	15294031	TruSeq	normalized	2017-07-04	TruSeq1	Illumina	HiSeq_2500	none	lane_pool37F	30	22.46	4	42	initial_denaturation:95_5;_denaturation:_94_0.5;_annealing:52_0.2;_elongation:_72_1;_40_cycles;_final_elongation:72_2	9.2	3.26	29.99
37F.DNA.161.A	CCGCGGTC	CCGCGGTC	18S_rRNA	37F	37F	DNA	161	A	No	MIMARKS-survey	DSMP	gene|marine_metagenome|uncultured_microorganism|uncultured_organism|ecotype|biological_replicate|technical_replicate|interspecies_interaction_between_organisms	0	marine_abyssal_zone_biome	marine_oligotrophic_desert	mud	sediment	aerobe	https://www.qiagen.com/us/cmp/ecom/powersoilkits?COECM_MOBIO_Branded_1707_SEA_PowerSoil__&kwid=%2Bpower%20%2Bsoil%20%2Brna	https://github.com/FranckLejzerowicz/protocols	TruSeq_Nano_PCR_free_Library_Preparation_Kit_single-end	uchime_4.2	TRUE	15.7	F1-I	15-S	GACTGTATAAGGGCACCACAAGAACGC	TAGCATGTCCACCTATCACACAATCATG	FWD:_{AAGGGCACCACAAGAACGC}_REV:_{CCACCTATCACACAATCATG}	F1-I_15-S	GACTGTATAAGGGCACCACAAGAACGC_TAGCATGTCCACCTATCACACAATCATG	DSMP_37F_DNA_A_1_2	15316119	TruSeq	normalized	2017-07-04	TruSeq4	Illumina	HiSeq_2500	none	lane_pool37F	27	20.04	4	42	initial_denaturation:95_5;_denaturation:_94_0.5;_annealing:52_0.2;_elongation:_72_1;_40_cycles;_final_elongation:72_2	1.1	24.55	27.01
37F.DNA.161.B	CCGCGGTG	CCGCGGTG	18S_rRNA	37F	37F	DNA	161	B	No	MIMARKS-survey	DSMP	gene|marine_metagenome|uncultured_microorganism|uncultured_organism|ecotype|biological_replicate|technical_replicate|interspecies_interaction_between_organisms	0	marine_abyssal_zone_biome	marine_oligotrophic_desert	mud	sediment	aerobe	https://www.qiagen.com/us/cmp/ecom/powersoilkits?COECM_MOBIO_Branded_1707_SEA_PowerSoil__&kwid=%2Bpower%20%2Bsoil%20%2Brna	https://github.com/FranckLejzerowicz/protocols	TruSeq_Nano_PCR_free_Library_Preparation_Kit_single-end	uchime_4.2	TRUE	15.7	F1-I	15-S	GACTGTATAAGGGCACCACAAGAACGC	TAGCATGTCCACCTATCACACAATCATG	FWD:_{AAGGGCACCACAAGAACGC}_REV:_{CCACCTATCACACAATCATG}	F1-I_15-S	GACTGTATAAGGGCACCACAAGAACGC_TAGCATGTCCACCTATCACACAATCATG	DSMP_37F_DNA_B_1_3	1877212	TruSeq	normalized	2017-07-04	TruSeq10	Illumina	HiSeq_2500	none	lane_pool37F	40	535.96	4	41	initial_denaturation:95_5;_denaturation:_94_0.5;_annealing:52_0.2;_elongation:_72_1;_40_cycles;_final_elongation:72_2	1.2	50	60
37F.DNA.162.A	CCGCGGTT	CCGCGGTT	18S_rRNA	37F	37F	DNA	162	A	No	MIMARKS-survey	DSMP	gene|marine_metagenome|uncultured_microorganism|uncultured_organism|ecotype|biological_replicate|technical_replicate|interspecies_interaction_between_organisms	0	marine_abyssal_zone_biome	marine_oligotrophic_desert	mud	sediment	aerobe	https://www.qiagen.com/us/cmp/ecom/powersoilkits?COECM_MOBIO_Branded_1707_SEA_PowerSoil__&kwid=%2Bpower%20%2Bsoil%20%2Brna	https://github.com/FranckLejzerowicz/protocols	TruSeq_Nano_PCR_free_Library_Preparation_Kit_single-end	uchime_4.2	TRUE	65.5	F1-I	15-W	GACTGTATAAGGGCACCACAAGAACGC	TGATATGCCCACCTATCACACAATCATG	FWD:_{AAGGGCACCACAAGAACGC}_REV:_{CCACCTATCACACAATCATG}	F1-I_15-W	GACTGTATAAGGGCACCACAAGAACGC_TGATATGCCCACCTATCACACAATCATG	DSMP_37F_DNA_A_1_2	15316119	TruSeq	normalized	2017-07-04	TruSeq4	Illumina	HiSeq_2500	none	lane_pool37F	27	20.04	4	42	initial_denaturation:95_5;_denaturation:_94_0.5;_annealing:52_0.2;_elongation:_72_1;_40_cycles;_final_elongation:72_2	4.9	5.51	27
37F.DNA.162.B	CCGCGTCC	CCGCGTCC	18S_rRNA	37F	37F	DNA	162	B	No	MIMARKS-survey	DSMP	gene|marine_metagenome|uncultured_microorganism|uncultured_organism|ecotype|biological_replicate|technical_replicate|interspecies_interaction_between_organisms	0	marine_abyssal_zone_biome	marine_oligotrophic_desert	mud	sediment	aerobe	https://www.qiagen.com/us/cmp/ecom/powersoilkits?COECM_MOBIO_Branded_1707_SEA_PowerSoil__&kwid=%2Bpower%20%2Bsoil%20%2Brna	https://github.com/FranckLejzerowicz/protocols	TruSeq_Nano_PCR_free_Library_Preparation_Kit_single-end	uchime_4.2	TRUE	65.5	F1-I	15-W	GACTGTATAAGGGCACCACAAGAACGC	TGATATGCCCACCTATCACACAATCATG	FWD:_{AAGGGCACCACAAGAACGC}_REV:_{CCACCTATCACACAATCATG}	F1-I_15-W	GACTGTATAAGGGCACCACAAGAACGC_TGATATGCCCACCTATCACACAATCATG	DSMP_37F_DNA_B_1_3	1877212	TruSeq	normalized	2017-07-04	TruSeq10	Illumina	HiSeq_2500	none	lane_pool37F	40	535.96	4	41	initial_denaturation:95_5;_denaturation:_94_0.5;_annealing:52_0.2;_elongation:_72_1;_40_cycles;_final_elongation:72_2	4.3	9.3	39.99
37F.DNA.163.A	CCGCGTCG	CCGCGTCG	18S_rRNA	37F	37F	DNA	163	A	No	MIMARKS-survey	DSMP	gene|marine_metagenome|uncultured_microorganism|uncultured_organism|ecotype|biological_replicate|technical_replicate|interspecies_interaction_between_organisms	0	marine_abyssal_zone_biome	marine_oligotrophic_desert	mud	sediment	aerobe	https://www.qiagen.com/us/cmp/ecom/powersoilkits?COECM_MOBIO_Branded_1707_SEA_PowerSoil__&kwid=%2Bpower%20%2Bsoil%20%2Brna	https://github.com/FranckLejzerowicz/protocols	TruSeq_Nano_PCR_free_Library_Preparation_Kit_single-end	uchime_4.2	TRUE	41.7	F1-J	15-C	GAGACTCTAAGGGCACCACAAGAACGC	AGTCGCGTCCACCTATCACACAATCATG	FWD:_{AAGGGCACCACAAGAACGC}_REV:_{CCACCTATCACACAATCATG}	F1-J_15-C	GAGACTCTAAGGGCACCACAAGAACGC_AGTCGCGTCCACCTATCACACAATCATG	DSMP_37F_DNA_A_1_2	15316119	TruSeq	normalized	2017-07-04	TruSeq4	Illumina	HiSeq_2500	none	lane_pool37F	27	20.04	4	42	initial_denaturation:95_5;_denaturation:_94_0.5;_annealing:52_0.2;_elongation:_72_1;_40_cycles;_final_elongation:72_2	6.6	4.09	26.99
37F.DNA.163.B	CCGCGTCT	CCGCGTCT	18S_rRNA	37F	37F	DNA	163	B	No	MIMARKS-survey	DSMP	gene|marine_metagenome|uncultured_microorganism|uncultured_organism|ecotype|biological_replicate|technical_replicate|interspecies_interaction_between_organisms	0	marine_abyssal_zone_biome	marine_oligotrophic_desert	mud	sediment	aerobe	https://www.qiagen.com/us/cmp/ecom/powersoilkits?COECM_MOBIO_Branded_1707_SEA_PowerSoil__&kwid=%2Bpower%20%2Bsoil%20%2Brna	https://github.com/FranckLejzerowicz/protocols	TruSeq_Nano_PCR_free_Library_Preparation_Kit_single-end	uchime_4.2	TRUE	41.7	F1-J	15-C	GAGACTCTAAGGGCACCACAAGAACGC	AGTCGCGTCCACCTATCACACAATCATG	FWD:_{AAGGGCACCACAAGAACGC}_REV:_{CCACCTATCACACAATCATG}	F1-J_15-C	GAGACTCTAAGGGCACCACAAGAACGC_AGTCGCGTCCACCTATCACACAATCATG	DSMP_37F_DNA_B_1_3	1877212	TruSeq	normalized	2017-07-04	TruSeq10	Illumina	HiSeq_2500	none	lane_pool37F	40	535.96	4	41	initial_denaturation:95_5;_denaturation:_94_0.5;_annealing:52_0.2;_elongation:_72_1;_40_cycles;_final_elongation:72_2	6.8	5.88	39.98
37F.DNA.164.A	CCGCGTGC	CCGCGTGC	18S_rRNA	37F	37F	DNA	164	A	No	MIMARKS-survey	DSMP	gene|marine_metagenome|uncultured_microorganism|uncultured_organism|ecotype|biological_replicate|technical_replicate|interspecies_interaction_between_organisms	0	marine_abyssal_zone_biome	marine_oligotrophic_desert	mud	sediment	aerobe	https://www.qiagen.com/us/cmp/ecom/powersoilkits?COECM_MOBIO_Branded_1707_SEA_PowerSoil__&kwid=%2Bpower%20%2Bsoil%20%2Brna	https://github.com/FranckLejzerowicz/protocols	TruSeq_Nano_PCR_free_Library_Preparation_Kit_single-end	uchime_4.2	TRUE	32.2	F1-J	15-D	GAGACTCTAAGGGCACCACAAGAACGC	AGTGCTGCCCACCTATCACACAATCATG	FWD:_{AAGGGCACCACAAGAACGC}_REV:_{CCACCTATCACACAATCATG}	F1-J_15-D	GAGACTCTAAGGGCACCACAAGAACGC_AGTGCTGCCCACCTATCACACAATCATG	DSMP_37F_DNA_A_1_3	18703377	TruSeq	normalized	2017-07-04	TruSeq5	Illumina	HiSeq_2500	none	lane_pool37F	27.5	17.75	4	41	initial_denaturation:95_5;_denaturation:_94_0.5;_annealing:52_0.2;_elongation:_72_1;_40_cycles;_final_elongation:72_2	7.7	3.57	27.49
37F.DNA.164.B	CCGCGTGG	CCGCGTGG	18S_rRNA	37F	37F	DNA	164	B	No	MIMARKS-survey	DSMP	gene|marine_metagenome|uncultured_microorganism|uncultured_organism|ecotype|biological_replicate|technical_replicate|interspecies_interaction_between_organisms	0	marine_abyssal_zone_biome	marine_oligotrophic_desert	mud	sediment	aerobe	https://www.qiagen.com/us/cmp/ecom/powersoilkits?COECM_MOBIO_Branded_1707_SEA_PowerSoil__&kwid=%2Bpower%20%2Bsoil%20%2Brna	https://github.com/FranckLejzerowicz/protocols	TruSeq_Nano_PCR_free_Library_Preparation_Kit_single-end	uchime_4.2	TRUE	32.2	F1-J	15-D	GAGACTCTAAGGGCACCACAAGAACGC	AGTGCTGCCCACCTATCACACAATCATG	FWD:_{AAGGGCACCACAAGAACGC}_REV:_{CCACCTATCACACAATCATG}	F1-J_15-D	GAGACTCTAAGGGCACCACAAGAACGC_AGTGCTGCCCACCTATCACACAATCATG	DSMP_37F_DNA_B_1_2	2198874	TruSeq	normalized	2017-07-04	TruSeq9	Illumina	HiSeq_2500	none	lane_pool37F	40	307.78	4	42	initial_denaturation:95_5;_denaturation:_94_0.5;_annealing:52_0.2;_elongation:_72_1;_40_cycles;_final_elongation:72_2	8.2	4.88	40.02
37F.DNA.165.A	CCGCGTGT	CCGCGTGT	18S_rRNA	37F	37F	DNA	165	A	No	MIMARKS-survey	DSMP	gene|marine_metagenome|uncultured_microorganism|uncultured_organism|ecotype|biological_replicate|technical_replicate|interspecies_interaction_between_organisms	0	marine_abyssal_zone_biome	marine_oligotrophic_desert	mud	sediment	aerobe	https://www.qiagen.com/us/cmp/ecom/powersoilkits?COECM_MOBIO_Branded_1707_SEA_PowerSoil__&kwid=%2Bpower%20%2Bsoil%20%2Brna	https://github.com/FranckLejzerowicz/protocols	TruSeq_Nano_PCR_free_Library_Preparation_Kit_single-end	uchime_4.2	TRUE	35.7	F1-J	15-O	GAGACTCTAAGGGCACCACAAGAACGC	CGAGCTAGCCACCTATCACACAATCATG	FWD:_{AAGGGCACCACAAGAACGC}_REV:_{CCACCTATCACACAATCATG}	F1-J_15-O	GAGACTCTAAGGGCACCACAAGAACGC_CGAGCTAGCCACCTATCACACAATCATG	DSMP_37F_DNA_A_1_1	15294031	TruSeq	normalized	2017-07-04	TruSeq1	Illumina	HiSeq_2500	none	lane_pool37F	30	22.46	4	42	initial_denaturation:95_5;_denaturation:_94_0.5;_annealing:52_0.2;_elongation:_72_1;_40_cycles;_final_elongation:72_2	8	3.75	30
37F.DNA.181.A	CCGCTCCT	CCGCTCCT	18S_rRNA	37F	37F	DNA	181	A	No	MIMARKS-survey	DSMP	gene|marine_metagenome|uncultured_microorganism|uncultured_organism|ecotype|biological_replicate|technical_replicate|interspecies_interaction_between_organisms	0	marine_abyssal_zone_biome	marine_oligotrophic_desert	mud	sediment	aerobe	https://www.qiagen.com/us/cmp/ecom/powersoilkits?COECM_MOBIO_Branded_1707_SEA_PowerSoil__&kwid=%2Bpower%20%2Bsoil%20%2Brna	https://github.com/FranckLejzerowicz/protocols	TruSeq_Nano_PCR_free_Library_Preparation_Kit_single-end	uchime_4.2	TRUE	8.41	F1-M	15-K	GCATCATCAAGGGCACCACAAGAACGC	CATCGTACCCACCTATCACACAATCATG	FWD:_{AAGGGCACCACAAGAACGC}_REV:_{CCACCTATCACACAATCATG}	F1-M_15-K	GCATCATCAAGGGCACCACAAGAACGC_CATCGTACCCACCTATCACACAATCATG	DSMP_37F_DNA_A_1_1	15294031	TruSeq	normalized	2017-07-04	TruSeq1	Illumina	HiSeq_2500	none	lane_pool37F	30	22.46	4	42	initial_denaturation:95_5;_denaturation:_94_0.5;_annealing:52_0.2;_elongation:_72_1;_40_cycles;_final_elongation:72_2	4.6	6.52	29.99
37F.DNA.181.B	CCGCTCGC	CCGCTCGC	18S_rRNA	37F	37F	DNA	181	B	No	MIMARKS-survey	DSMP	gene|marine_metagenome|uncultured_microorganism|uncultured_organism|ecotype|biological_replicate|technical_replicate|interspecies_interaction_between_organisms	0	marine_abyssal_zone_biome	marine_oligotrophic_desert	mud	sediment	aerobe	https://www.qiagen.com/us/cmp/ecom/powersoilkits?COECM_MOBIO_Branded_1707_SEA_PowerSoil__&kwid=%2Bpower%20%2Bsoil%20%2Brna	https://github.com/FranckLejzerowicz/protocols	TruSeq_Nano_PCR_free_Library_Preparation_Kit_single-end	uchime_4.2	TRUE	8.41	F1-M	15-K	GCATCATCAAGGGCACCACAAGAACGC	CATCGTACCCACCTATCACACAATCATG	FWD:_{AAGGGCACCACAAGAACGC}_REV:_{CCACCTATCACACAATCATG}	F1-M_15-K	GCATCATCAAGGGCACCACAAGAACGC_CATCGTACCCACCTATCACACAATCATG	DSMP_37F_DNA_B_1_3	1877212	TruSeq	normalized	2017-07-04	TruSeq10	Illumina	HiSeq_2500	none	lane_pool37F	40	535.96	4	41	initial_denaturation:95_5;_denaturation:_94_0.5;_annealing:52_0.2;_elongation:_72_1;_40_cycles;_final_elongation:72_2	4.2	9.52	39.98
37F.DNA.182.A	CCGCTCGG	CCGCTCGG	18S_rRNA	37F	37F	DNA	182	A	No	MIMARKS-survey	DSMP	gene|marine_metagenome|uncultured_microorganism|uncultured_organism|ecotype|biological_replicate|technical_replicate|interspecies_interaction_between_organisms	0	marine_abyssal_zone_biome	marine_oligotrophic_desert	mud	sediment	aerobe	https://www.qiagen.com/us/cmp/ecom/powersoilkits?COECM_MOBIO_Branded_1707_SEA_PowerSoil__&kwid=%2Bpower%20%2Bsoil%20%2Brna	https://github.com/FranckLejzerowicz/protocols	TruSeq_Nano_PCR_free_Library_Preparation_Kit_single-end	uchime_4.2	TRUE	6.34	F1-M	15-S	GCATCATCAAGGGCACCACAAGAACGC	TAGCATGTCCACCTATCACACAATCATG	FWD:_{AAGGGCACCACAAGAACGC}_REV:_{CCACCTATCACACAATCATG}	F1-M_15-S	GCATCATCAAGGGCACCACAAGAACGC_TAGCATGTCCACCTATCACACAATCATG	DSMP_37F_DNA_A_1_2	15316119	TruSeq	normalized	2017-07-04	TruSeq4	Illumina	HiSeq_2500	none	lane_pool37F	27	20.04	4	42	initial_denaturation:95_5;_denaturation:_94_0.5;_annealing:52_0.2;_elongation:_72_1;_40_cycles;_final_elongation:72_2	1.12	24.11	27
37F.DNA.182.B	CCGCTCGT	CCGCTCGT	18S_rRNA	37F	37F	DNA	182	B	No	MIMARKS-survey	DSMP	gene|marine_metagenome|uncultured_microorganism|uncultured_organism|ecotype|biological_replicate|technical_replicate|interspecies_interaction_between_organisms	0	marine_abyssal_zone_biome	marine_oligotrophic_desert	mud	sediment	aerobe	https://www.qiagen.com/us/cmp/ecom/powersoilkits?COECM_MOBIO_Branded_1707_SEA_PowerSoil__&kwid=%2Bpower%20%2Bsoil%20%2Brna	https://github.com/FranckLejzerowicz/protocols	TruSeq_Nano_PCR_free_Library_Preparation_Kit_single-end	uchime_4.2	TRUE	6.34	F1-M	15-S	GCATCATCAAGGGCACCACAAGAACGC	TAGCATGTCCACCTATCACACAATCATG	FWD:_{AAGGGCACCACAAGAACGC}_REV:_{CCACCTATCACACAATCATG}	F1-M_15-S	GCATCATCAAGGGCACCACAAGAACGC_TAGCATGTCCACCTATCACACAATCATG	DSMP_37F_DNA_B_1_1	2278945	TruSeq	normalized	2017-07-04	TruSeq8	Illumina	HiSeq_2500	none	lane_pool37F	40	337.28	4	42	initial_denaturation:95_5;_denaturation:_94_0.5;_annealing:52_0.2;_elongation:_72_1;_40_cycles;_final_elongation:72_2	1.04	50	52
37F.DNA.190.A	CCGCTCTT	CCGCTCTT	18S_rRNA	37F	37F	DNA	190	A	No	MIMARKS-survey	DSMP	gene|marine_metagenome|uncultured_microorganism|uncultured_organism|ecotype|biological_replicate|technical_replicate|interspecies_interaction_between_organisms	0	marine_abyssal_zone_biome	marine_oligotrophic_desert	mud	sediment	aerobe	https://www.qiagen.com/us/cmp/ecom/powersoilkits?COECM_MOBIO_Branded_1707_SEA_PowerSoil__&kwid=%2Bpower%20%2Bsoil%20%2Brna	https://github.com/FranckLejzerowicz/protocols	TruSeq_Nano_PCR_free_Library_Preparation_Kit_single-end	uchime_4.2	TRUE	22.4	F1-N	15-Q	GCGATGTCAAGGGCACCACAAGAACGC	CTGCACGCCCACCTATCACACAATCATG	FWD:_{AAGGGCACCACAAGAACGC}_REV:_{CCACCTATCACACAATCATG}	F1-N_15-Q	GCGATGTCAAGGGCACCACAAGAACGC_CTGCACGCCCACCTATCACACAATCATG	DSMP_37F_DNA_A_1_2	15316119	TruSeq	normalized	2017-07-04	TruSeq4	Illumina	HiSeq_2500	none	lane_pool37F	27	20.04	4	42	initial_denaturation:95_5;_denaturation:_94_0.5;_annealing:52_0.2;_elongation:_72_1;_40_cycles;_final_elongation:72_2	1.3	20.77	27
37F.DNA.190.B	CCGCTGCC	CCGCTGCC	18S_rRNA	37F	37F	DNA	190	B	No	MIMARKS-survey	DSMP	gene|marine_metagenome|uncultured_microorganism|uncultured_organism|ecotype|biological_replicate|technical_replicate|interspecies_interaction_between_organisms	0	marine_abyssal_zone_biome	marine_oligotrophic_desert	mud	sediment	aerobe	https://www.qiagen.com/us/cmp/ecom/powersoilkits?COECM_MOBIO_Branded_1707_SEA_PowerSoil__&kwid=%2Bpower%20%2Bsoil%20%2Brna	https://github.com/FranckLejzerowicz/protocols	TruSeq_Nano_PCR_free_Library_Preparation_Kit_single-end	uchime_4.2	TRUE	22.4	F1-N	15-Q	GCGATGTCAAGGGCACCACAAGAACGC	CTGCACGCCCACCTATCACACAATCATG	FWD:_{AAGGGCACCACAAGAACGC}_REV:_{CCACCTATCACACAATCATG}	F1-N_15-Q	GCGATGTCAAGGGCACCACAAGAACGC_CTGCACGCCCACCTATCACACAATCATG	DSMP_37F_DNA_B_1_3	1877212	TruSeq	normalized	2017-07-04	TruSeq10	Illumina	HiSeq_2500	none	lane_pool37F	40	535.96	4	41	initial_denaturation:95_5;_denaturation:_94_0.5;_annealing:52_0.2;_elongation:_72_1;_40_cycles;_final_elongation:72_2	1.1	50	55
37F.DNA.193.A	CCGCTGGC	CCGCTGGC	18S_rRNA	37F	37F	DNA	193	A	No	MIMARKS-survey	DSMP	gene|marine_metagenome|uncultured_microorganism|uncultured_organism|ecotype|biological_replicate|technical_replicate|interspecies_interaction_between_organisms	0	marine_abyssal_zone_biome	marine_oligotrophic_desert	mud	sediment	aerobe	https://www.qiagen.com/us/cmp/ecom/powersoilkits?COECM_MOBIO_Branded_1707_SEA_PowerSoil__&kwid=%2Bpower%20%2Bsoil%20%2Brna	https://github.com/FranckLejzerowicz/protocols	TruSeq_Nano_PCR_free_Library_Preparation_Kit_single-end	uchime_4.2	TRUE	10.1	F1-O	15-B	GCGTGTCAAAGGGCACCACAAGAACGC	AGATGATGCCACCTATCACACAATCATG	FWD:_{AAGGGCACCACAAGAACGC}_REV:_{CCACCTATCACACAATCATG}	F1-O_15-B	GCGTGTCAAAGGGCACCACAAGAACGC_AGATGATGCCACCTATCACACAATCATG	DSMP_37F_DNA_A_1_3	18703377	TruSeq	normalized	2017-07-04	TruSeq5	Illumina	HiSeq_2500	none	lane_pool37F	27.5	17.75	4	41	initial_denaturation:95_5;_denaturation:_94_0.5;_annealing:52_0.2;_elongation:_72_1;_40_cycles;_final_elongation:72_2	6.2	4.43	27.47
37F.DNA.193.B	CCGCTGGG	CCGCTGGG	18S_rRNA	37F	37F	DNA	193	B	No	MIMARKS-survey	DSMP	gene|marine_metagenome|uncultured_microorganism|uncultured_organism|ecotype|biological_replicate|technical_replicate|interspecies_interaction_between_organisms	0	marine_abyssal_zone_biome	marine_oligotrophic_desert	mud	sediment	aerobe	https://www.qiagen.com/us/cmp/ecom/powersoilkits?COECM_MOBIO_Branded_1707_SEA_PowerSoil__&kwid=%2Bpower%20%2Bsoil%20%2Brna	https://github.com/FranckLejzerowicz/protocols	TruSeq_Nano_PCR_free_Library_Preparation_Kit_single-end	uchime_4.2	TRUE	10.1	F1-O	15-B	GCGTGTCAAAGGGCACCACAAGAACGC	AGATGATGCCACCTATCACACAATCATG	FWD:_{AAGGGCACCACAAGAACGC}_REV:_{CCACCTATCACACAATCATG}	F1-O_15-B	GCGTGTCAAAGGGCACCACAAGAACGC_AGATGATGCCACCTATCACACAATCATG	DSMP_37F_DNA_B_1_1	2278945	TruSeq	normalized	2017-07-04	TruSeq8	Illumina	HiSeq_2500	none	lane_pool37F	40	337.28	4	42	initial_denaturation:95_5;_denaturation:_94_0.5;_annealing:52_0.2;_elongation:_72_1;_40_cycles;_final_elongation:72_2	7.6	5.26	39.98
37F.DNA.196.A	CCGCTGGT	CCGCTGGT	18S_rRNA	37F	37F	DNA	196	A	No	MIMARKS-survey	DSMP	gene|marine_metagenome|uncultured_microorganism|uncultured_organism|ecotype|biological_replicate|technical_replicate|interspecies_interaction_between_organisms	0	marine_abyssal_zone_biome	marine_oligotrophic_desert	mud	sediment	aerobe	https://www.qiagen.com/us/cmp/ecom/powersoilkits?COECM_MOBIO_Branded_1707_SEA_PowerSoil__&kwid=%2Bpower%20%2Bsoil%20%2Brna	https://github.com/FranckLejzerowicz/protocols	TruSeq_Nano_PCR_free_Library_Preparation_Kit_single-end	uchime_4.2	TRUE	14	F1-O	15-U	GCGTGTCAAAGGGCACCACAAGAACGC	TATCGCTGCCACCTATCACACAATCATG	FWD:_{AAGGGCACCACAAGAACGC}_REV:_{CCACCTATCACACAATCATG}	F1-O_15-U	GCGTGTCAAAGGGCACCACAAGAACGC_TATCGCTGCCACCTATCACACAATCATG	DSMP_37F_DNA_A_1_1	15294031	TruSeq	normalized	2017-07-04	TruSeq1	Illumina	HiSeq_2500	none	lane_pool37F	30	22.46	4	42	initial_denaturation:95_5;_denaturation:_94_0.5;_annealing:52_0.2;_elongation:_72_1;_40_cycles;_final_elongation:72_2	0.96	50	48
37F.DNA.196.B	CCGCTGTC	CCGCTGTC	18S_rRNA	37F	37F	DNA	196	B	No	MIMARKS-survey	DSMP	gene|marine_metagenome|uncultured_microorganism|uncultured_organism|ecotype|biological_replicate|technical_replicate|interspecies_interaction_between_organisms	0	marine_abyssal_zone_biome	marine_oligotrophic_desert	mud	sediment	aerobe	https://www.qiagen.com/us/cmp/ecom/powersoilkits?COECM_MOBIO_Branded_1707_SEA_PowerSoil__&kwid=%2Bpower%20%2Bsoil%20%2Brna	https://github.com/FranckLejzerowicz/protocols	TruSeq_Nano_PCR_free_Library_Preparation_Kit_single-end	uchime_4.2	TRUE	14	F1-O	15-U	GCGTGTCAAAGGGCACCACAAGAACGC	TATCGCTGCCACCTATCACACAATCATG	FWD:_{AAGGGCACCACAAGAACGC}_REV:_{CCACCTATCACACAATCATG}	F1-O_15-U	GCGTGTCAAAGGGCACCACAAGAACGC_TATCGCTGCCACCTATCACACAATCATG	DSMP_37F_DNA_B_1_2	2198874	TruSeq	normalized	2017-07-04	TruSeq9	Illumina	HiSeq_2500	none	lane_pool37F	40	307.78	4	42	initial_denaturation:95_5;_denaturation:_94_0.5;_annealing:52_0.2;_elongation:_72_1;_40_cycles;_final_elongation:72_2	1.16	50	58
37F.DNA.197.A	CCGCTGTG	CCGCTGTG	18S_rRNA	37F	37F	DNA	197	A	No	MIMARKS-survey	DSMP	gene|marine_metagenome|uncultured_microorganism|uncultured_organism|ecotype|biological_replicate|technical_replicate|interspecies_interaction_between_organisms	0	marine_abyssal_zone_biome	marine_oligotrophic_desert	mud	sediment	aerobe	https://www.qiagen.com/us/cmp/ecom/powersoilkits?COECM_MOBIO_Branded_1707_SEA_PowerSoil__&kwid=%2Bpower%20%2Bsoil%20%2Brna	https://github.com/FranckLejzerowicz/protocols	TruSeq_Nano_PCR_free_Library_Preparation_Kit_single-end	uchime_4.2	TRUE	26.4	F1-O	15-V	GCGTGTCAAAGGGCACCACAAGAACGC	TATGACATCCACCTATCACACAATCATG	FWD:_{AAGGGCACCACAAGAACGC}_REV:_{CCACCTATCACACAATCATG}	F1-O_15-V	GCGTGTCAAAGGGCACCACAAGAACGC_TATGACATCCACCTATCACACAATCATG	DSMP_37F_DNA_A_1_3	18703377	TruSeq	normalized	2017-07-04	TruSeq5	Illumina	HiSeq_2500	none	lane_pool37F	27.5	17.75	4	41	initial_denaturation:95_5;_denaturation:_94_0.5;_annealing:52_0.2;_elongation:_72_1;_40_cycles;_final_elongation:72_2	1.2	22.92	27.5
37F.DNA.197.B	CCGCTGTT	CCGCTGTT	18S_rRNA	37F	37F	DNA	197	B	No	MIMARKS-survey	DSMP	gene|marine_metagenome|uncultured_microorganism|uncultured_organism|ecotype|biological_replicate|technical_replicate|interspecies_interaction_between_organisms	0	marine_abyssal_zone_biome	marine_oligotrophic_desert	mud	sediment	aerobe	https://www.qiagen.com/us/cmp/ecom/powersoilkits?COECM_MOBIO_Branded_1707_SEA_PowerSoil__&kwid=%2Bpower%20%2Bsoil%20%2Brna	https://github.com/FranckLejzerowicz/protocols	TruSeq_Nano_PCR_free_Library_Preparation_Kit_single-end	uchime_4.2	TRUE	26.4	F1-O	15-V	GCGTGTCAAAGGGCACCACAAGAACGC	TATGACATCCACCTATCACACAATCATG	FWD:_{AAGGGCACCACAAGAACGC}_REV:_{CCACCTATCACACAATCATG}	F1-O_15-V	GCGTGTCAAAGGGCACCACAAGAACGC_TATGACATCCACCTATCACACAATCATG	DSMP_37F_DNA_B_1_3	1877212	TruSeq	normalized	2017-07-04	TruSeq10	Illumina	HiSeq_2500	none	lane_pool37F	40	535.96	4	41	initial_denaturation:95_5;_denaturation:_94_0.5;_annealing:52_0.2;_elongation:_72_1;_40_cycles;_final_elongation:72_2	1.28	50	64
37F.DNA.200.A	CCGCTTCC	CCGCTTCC	18S_rRNA	37F	37F	DNA	200	A	No	MIMARKS-survey	DSMP	gene|marine_metagenome|uncultured_microorganism|uncultured_organism|ecotype|biological_replicate|technical_replicate|interspecies_interaction_between_organisms	0	marine_abyssal_zone_biome	marine_oligotrophic_desert	mud	sediment	aerobe	https://www.qiagen.com/us/cmp/ecom/powersoilkits?COECM_MOBIO_Branded_1707_SEA_PowerSoil__&kwid=%2Bpower%20%2Bsoil%20%2Brna	https://github.com/FranckLejzerowicz/protocols	TruSeq_Nano_PCR_free_Library_Preparation_Kit_single-end	uchime_4.2	TRUE	44.8	F1-P	15-E	TACTCGACAAGGGCACCACAAGAACGC	ATAGACTGCCACCTATCACACAATCATG	FWD:_{AAGGGCACCACAAGAACGC}_REV:_{CCACCTATCACACAATCATG}	F1-P_15-E	TACTCGACAAGGGCACCACAAGAACGC_ATAGACTGCCACCTATCACACAATCATG	DSMP_37F_DNA_A_1_3	18703377	TruSeq	normalized	2017-07-04	TruSeq5	Illumina	HiSeq_2500	none	lane_pool37F	27.5	17.75	4	41	initial_denaturation:95_5;_denaturation:_94_0.5;_annealing:52_0.2;_elongation:_72_1;_40_cycles;_final_elongation:72_2	1.52	18.09	27.5
37F.DNA.200.B	CCGCTTCG	CCGCTTCG	18S_rRNA	37F	37F	DNA	200	B	No	MIMARKS-survey	DSMP	gene|marine_metagenome|uncultured_microorganism|uncultured_organism|ecotype|biological_replicate|technical_replicate|interspecies_interaction_between_organisms	0	marine_abyssal_zone_biome	marine_oligotrophic_desert	mud	sediment	aerobe	https://www.qiagen.com/us/cmp/ecom/powersoilkits?COECM_MOBIO_Branded_1707_SEA_PowerSoil__&kwid=%2Bpower%20%2Bsoil%20%2Brna	https://github.com/FranckLejzerowicz/protocols	TruSeq_Nano_PCR_free_Library_Preparation_Kit_single-end	uchime_4.2	TRUE	44.8	F1-P	15-E	TACTCGACAAGGGCACCACAAGAACGC	ATAGACTGCCACCTATCACACAATCATG	FWD:_{AAGGGCACCACAAGAACGC}_REV:_{CCACCTATCACACAATCATG}	F1-P_15-E	TACTCGACAAGGGCACCACAAGAACGC_ATAGACTGCCACCTATCACACAATCATG	DSMP_37F_DNA_B_1_3	1877212	TruSeq	normalized	2017-07-04	TruSeq10	Illumina	HiSeq_2500	none	lane_pool37F	40	535.96	4	41	initial_denaturation:95_5;_denaturation:_94_0.5;_annealing:52_0.2;_elongation:_72_1;_40_cycles;_final_elongation:72_2	1.48	27.03	40
37F.DNA.201.A	CCGCTTCT	CCGCTTCT	18S_rRNA	37F	37F	DNA	201	A	No	MIMARKS-survey	DSMP	gene|marine_metagenome|uncultured_microorganism|uncultured_organism|ecotype|biological_replicate|technical_replicate|interspecies_interaction_between_organisms	0	marine_abyssal_zone_biome	marine_oligotrophic_desert	mud	sediment	aerobe	https://www.qiagen.com/us/cmp/ecom/powersoilkits?COECM_MOBIO_Branded_1707_SEA_PowerSoil__&kwid=%2Bpower%20%2Bsoil%20%2Brna	https://github.com/FranckLejzerowicz/protocols	TruSeq_Nano_PCR_free_Library_Preparation_Kit_single-end	uchime_4.2	TRUE	34.1	F1-P	15-J	TACTCGACAAGGGCACCACAAGAACGC	CAGTGCAGCCACCTATCACACAATCATG	FWD:_{AAGGGCACCACAAGAACGC}_REV:_{CCACCTATCACACAATCATG}	F1-P_15-J	TACTCGACAAGGGCACCACAAGAACGC_CAGTGCAGCCACCTATCACACAATCATG	DSMP_37F_DNA_A_1_2	15316119	TruSeq	normalized	2017-07-04	TruSeq4	Illumina	HiSeq_2500	none	lane_pool37F	27	20.04	4	42	initial_denaturation:95_5;_denaturation:_94_0.5;_annealing:52_0.2;_elongation:_72_1;_40_cycles;_final_elongation:72_2	6.1	4.43	27.02
37F.DNA.201.B	CCGCTTGC	CCGCTTGC	18S_rRNA	37F	37F	DNA	201	B	No	MIMARKS-survey	DSMP	gene|marine_metagenome|uncultured_microorganism|uncultured_organism|ecotype|biological_replicate|technical_replicate|interspecies_interaction_between_organisms	0	marine_abyssal_zone_biome	marine_oligotrophic_desert	mud	sediment	aerobe	https://www.qiagen.com/us/cmp/ecom/powersoilkits?COECM_MOBIO_Branded_1707_SEA_PowerSoil__&kwid=%2Bpower%20%2Bsoil%20%2Brna	https://github.com/FranckLejzerowicz/protocols	TruSeq_Nano_PCR_free_Library_Preparation_Kit_single-end	uchime_4.2	TRUE	34.1	F1-P	15-J	TACTCGACAAGGGCACCACAAGAACGC	CAGTGCAGCCACCTATCACACAATCATG	FWD:_{AAGGGCACCACAAGAACGC}_REV:_{CCACCTATCACACAATCATG}	F1-P_15-J	TACTCGACAAGGGCACCACAAGAACGC_CAGTGCAGCCACCTATCACACAATCATG	DSMP_37F_DNA_B_1_1	2278945	TruSeq	normalized	2017-07-04	TruSeq8	Illumina	HiSeq_2500	none	lane_pool37F	40	337.28	4	42	initial_denaturation:95_5;_denaturation:_94_0.5;_annealing:52_0.2;_elongation:_72_1;_40_cycles;_final_elongation:72_2	5.5	7.27	39.98
37F.DNA.202.A	CCGCTTGG	CCGCTTGG	18S_rRNA	37F	37F	DNA	202	A	No	MIMARKS-survey	DSMP	gene|marine_metagenome|uncultured_microorganism|uncultured_organism|ecotype|biological_replicate|technical_replicate|interspecies_interaction_between_organisms	0	marine_abyssal_zone_biome	marine_oligotrophic_desert	mud	sediment	aerobe	https://www.qiagen.com/us/cmp/ecom/powersoilkits?COECM_MOBIO_Branded_1707_SEA_PowerSoil__&kwid=%2Bpower%20%2Bsoil%20%2Brna	https://github.com/FranckLejzerowicz/protocols	TruSeq_Nano_PCR_free_Library_Preparation_Kit_single-end	uchime_4.2	TRUE	37.7	F1-P	15-O	TACTCGACAAGGGCACCACAAGAACGC	CGAGCTAGCCACCTATCACACAATCATG	FWD:_{AAGGGCACCACAAGAACGC}_REV:_{CCACCTATCACACAATCATG}	F1-P_15-O	TACTCGACAAGGGCACCACAAGAACGC_CGAGCTAGCCACCTATCACACAATCATG	DSMP_37F_DNA_A_1_2	15316119	TruSeq	normalized	2017-07-04	TruSeq4	Illumina	HiSeq_2500	none	lane_pool37F	27	20.04	4	42	initial_denaturation:95_5;_denaturation:_94_0.5;_annealing:52_0.2;_elongation:_72_1;_40_cycles;_final_elongation:72_2	3.4	7.94	27
37F.DNA.202.B	CCGCTTGT	CCGCTTGT	18S_rRNA	37F	37F	DNA	202	B	No	MIMARKS-survey	DSMP	gene|marine_metagenome|uncultured_microorganism|uncultured_organism|ecotype|biological_replicate|technical_replicate|interspecies_interaction_between_organisms	0	marine_abyssal_zone_biome	marine_oligotrophic_desert	mud	sediment	aerobe	https://www.qiagen.com/us/cmp/ecom/powersoilkits?COECM_MOBIO_Branded_1707_SEA_PowerSoil__&kwid=%2Bpower%20%2Bsoil%20%2Brna	https://github.com/FranckLejzerowicz/protocols	TruSeq_Nano_PCR_free_Library_Preparation_Kit_single-end	uchime_4.2	TRUE	37.7	F1-P	15-O	TACTCGACAAGGGCACCACAAGAACGC	CGAGCTAGCCACCTATCACACAATCATG	FWD:_{AAGGGCACCACAAGAACGC}_REV:_{CCACCTATCACACAATCATG}	F1-P_15-O	TACTCGACAAGGGCACCACAAGAACGC_CGAGCTAGCCACCTATCACACAATCATG	DSMP_37F_DNA_B_1_1	2278945	TruSeq	normalized	2017-07-04	TruSeq8	Illumina	HiSeq_2500	none	lane_pool37F	40	337.28	4	42	initial_denaturation:95_5;_denaturation:_94_0.5;_annealing:52_0.2;_elongation:_72_1;_40_cycles;_final_elongation:72_2	3	13.33	39.99
37F.DNA.203.A	CCGCTTTC	CCGCTTTC	18S_rRNA	37F	37F	DNA	203	A	No	MIMARKS-survey	DSMP	gene|marine_metagenome|uncultured_microorganism|uncultured_organism|ecotype|biological_replicate|technical_replicate|interspecies_interaction_between_organisms	0	marine_abyssal_zone_biome	marine_oligotrophic_desert	mud	sediment	aerobe	https://www.qiagen.com/us/cmp/ecom/powersoilkits?COECM_MOBIO_Branded_1707_SEA_PowerSoil__&kwid=%2Bpower%20%2Bsoil%20%2Brna	https://github.com/FranckLejzerowicz/protocols	TruSeq_Nano_PCR_free_Library_Preparation_Kit_single-end	uchime_4.2	TRUE	45.6	F1-P	15-R	TACTCGACAAGGGCACCACAAGAACGC	CTGTATATCCACCTATCACACAATCATG	FWD:_{AAGGGCACCACAAGAACGC}_REV:_{CCACCTATCACACAATCATG}	F1-P_15-R	TACTCGACAAGGGCACCACAAGAACGC_CTGTATATCCACCTATCACACAATCATG	DSMP_37F_DNA_A_1_3	18703377	TruSeq	normalized	2017-07-04	TruSeq5	Illumina	HiSeq_2500	none	lane_pool37F	27.5	17.75	4	41	initial_denaturation:95_5;_denaturation:_94_0.5;_annealing:52_0.2;_elongation:_72_1;_40_cycles;_final_elongation:72_2	1.6	17.19	27.5
37F.DNA.203.B	CCGCTTTG	CCGCTTTG	18S_rRNA	37F	37F	DNA	203	B	No	MIMARKS-survey	DSMP	gene|marine_metagenome|uncultured_microorganism|uncultured_organism|ecotype|biological_replicate|technical_replicate|interspecies_interaction_between_organisms	0	marine_abyssal_zone_biome	marine_oligotrophic_desert	mud	sediment	aerobe	https://www.qiagen.com/us/cmp/ecom/powersoilkits?COECM_MOBIO_Branded_1707_SEA_PowerSoil__&kwid=%2Bpower%20%2Bsoil%20%2Brna	https://github.com/FranckLejzerowicz/protocols	TruSeq_Nano_PCR_free_Library_Preparation_Kit_single-end	uchime_4.2	TRUE	45.6	F1-P	15-R	TACTCGACAAGGGCACCACAAGAACGC	CTGTATATCCACCTATCACACAATCATG	FWD:_{AAGGGCACCACAAGAACGC}_REV:_{CCACCTATCACACAATCATG}	F1-P_15-R	TACTCGACAAGGGCACCACAAGAACGC_CTGTATATCCACCTATCACACAATCATG	DSMP_37F_DNA_B_1_2	2198874	TruSeq	normalized	2017-07-04	TruSeq9	Illumina	HiSeq_2500	none	lane_pool37F	40	307.78	4	42	initial_denaturation:95_5;_denaturation:_94_0.5;_annealing:52_0.2;_elongation:_72_1;_40_cycles;_final_elongation:72_2	1.4	50	70
37F.DNA.204.A	CCGCTTTT	CCGCTTTT	18S_rRNA	37F	37F	DNA	204	A	No	MIMARKS-survey	DSMP	gene|marine_metagenome|uncultured_microorganism|uncultured_organism|ecotype|biological_replicate|technical_replicate|interspecies_interaction_between_organisms	0	marine_abyssal_zone_biome	marine_oligotrophic_desert	mud	sediment	aerobe	https://www.qiagen.com/us/cmp/ecom/powersoilkits?COECM_MOBIO_Branded_1707_SEA_PowerSoil__&kwid=%2Bpower%20%2Bsoil%20%2Brna	https://github.com/FranckLejzerowicz/protocols	TruSeq_Nano_PCR_free_Library_Preparation_Kit_single-end	uchime_4.2	TRUE	68.5	F1-P	15-Z	TACTCGACAAGGGCACCACAAGAACGC	TGTGCATGCCACCTATCACACAATCATG	FWD:_{AAGGGCACCACAAGAACGC}_REV:_{CCACCTATCACACAATCATG}	F1-P_15-Z	TACTCGACAAGGGCACCACAAGAACGC_TGTGCATGCCACCTATCACACAATCATG	DSMP_37F_DNA_A_1_3	18703377	TruSeq	normalized	2017-07-04	TruSeq5	Illumina	HiSeq_2500	none	lane_pool37F	27.5	17.75	4	41	initial_denaturation:95_5;_denaturation:_94_0.5;_annealing:52_0.2;_elongation:_72_1;_40_cycles;_final_elongation:72_2	2.8	9.82	27.5
37F.DNA.204.B	CCGGCCCC	CCGGCCCC	18S_rRNA	37F	37F	DNA	204	B	No	MIMARKS-survey	DSMP	gene|marine_metagenome|uncultured_microorganism|uncultured_organism|ecotype|biological_replicate|technical_replicate|interspecies_interaction_between_organisms	0	marine_abyssal_zone_biome	marine_oligotrophic_desert	mud	sediment	aerobe	https://www.qiagen.com/us/cmp/ecom/powersoilkits?COECM_MOBIO_Branded_1707_SEA_PowerSoil__&kwid=%2Bpower%20%2Bsoil%20%2Brna	https://github.com/FranckLejzerowicz/protocols	TruSeq_Nano_PCR_free_Library_Preparation_Kit_single-end	uchime_4.2	TRUE	68.5	F1-P	15-Z	TACTCGACAAGGGCACCACAAGAACGC	TGTGCATGCCACCTATCACACAATCATG	FWD:_{AAGGGCACCACAAGAACGC}_REV:_{CCACCTATCACACAATCATG}	F1-P_15-Z	TACTCGACAAGGGCACCACAAGAACGC_TGTGCATGCCACCTATCACACAATCATG	DSMP_37F_DNA_B_1_1	2278945	TruSeq	normalized	2017-07-04	TruSeq8	Illumina	HiSeq_2500	none	lane_pool37F	40	337.28	4	42	initial_denaturation:95_5;_denaturation:_94_0.5;_annealing:52_0.2;_elongation:_72_1;_40_cycles;_final_elongation:72_2	2.3	17.39	40
37F.DNA.205.A	CCGGCCCG	CCGGCCCG	18S_rRNA	37F	37F	DNA	205	A	No	MIMARKS-survey	DSMP	gene|marine_metagenome|uncultured_microorganism|uncultured_organism|ecotype|biological_replicate|technical_replicate|interspecies_interaction_between_organisms	0	marine_abyssal_zone_biome	marine_oligotrophic_desert	mud	sediment	aerobe	https://www.qiagen.com/us/cmp/ecom/powersoilkits?COECM_MOBIO_Branded_1707_SEA_PowerSoil__&kwid=%2Bpower%20%2Bsoil%20%2Brna	https://github.com/FranckLejzerowicz/protocols	TruSeq_Nano_PCR_free_Library_Preparation_Kit_single-end	uchime_4.2	TRUE	48.3	F1-Q	15-I	TAGATGCAAAGGGCACCACAAGAACGC	ATGTGCTCCCACCTATCACACAATCATG	FWD:_{AAGGGCACCACAAGAACGC}_REV:_{CCACCTATCACACAATCATG}	F1-Q_15-I	TAGATGCAAAGGGCACCACAAGAACGC_ATGTGCTCCCACCTATCACACAATCATG	DSMP_37F_DNA_A_1_1	15294031	TruSeq	normalized	2017-07-04	TruSeq1	Illumina	HiSeq_2500	none	lane_pool37F	30	22.46	4	42	initial_denaturation:95_5;_denaturation:_94_0.5;_annealing:52_0.2;_elongation:_72_1;_40_cycles;_final_elongation:72_2	5	6	30
37F.DNA.205.B	CCGGCCCT	CCGGCCCT	18S_rRNA	37F	37F	DNA	205	B	No	MIMARKS-survey	DSMP	gene|marine_metagenome|uncultured_microorganism|uncultured_organism|ecotype|biological_replicate|technical_replicate|interspecies_interaction_between_organisms	0	marine_abyssal_zone_biome	marine_oligotrophic_desert	mud	sediment	aerobe	https://www.qiagen.com/us/cmp/ecom/powersoilkits?COECM_MOBIO_Branded_1707_SEA_PowerSoil__&kwid=%2Bpower%20%2Bsoil%20%2Brna	https://github.com/FranckLejzerowicz/protocols	TruSeq_Nano_PCR_free_Library_Preparation_Kit_single-end	uchime_4.2	TRUE	48.3	F1-Q	15-I	TAGATGCAAAGGGCACCACAAGAACGC	ATGTGCTCCCACCTATCACACAATCATG	FWD:_{AAGGGCACCACAAGAACGC}_REV:_{CCACCTATCACACAATCATG}	F1-Q_15-I	TAGATGCAAAGGGCACCACAAGAACGC_ATGTGCTCCCACCTATCACACAATCATG	DSMP_37F_DNA_B_1_3	1877212	TruSeq	normalized	2017-07-04	TruSeq10	Illumina	HiSeq_2500	none	lane_pool37F	40	535.96	4	41	initial_denaturation:95_5;_denaturation:_94_0.5;_annealing:52_0.2;_elongation:_72_1;_40_cycles;_final_elongation:72_2	6.3	6.35	40
37F.DNA.206.A	CCGGCCGC	CCGGCCGC	18S_rRNA	37F	37F	DNA	206	A	No	MIMARKS-survey	DSMP	gene|marine_metagenome|uncultured_microorganism|uncultured_organism|ecotype|biological_replicate|technical_replicate|interspecies_interaction_between_organisms	0	marine_abyssal_zone_biome	marine_oligotrophic_desert	mud	sediment	aerobe	https://www.qiagen.com/us/cmp/ecom/powersoilkits?COECM_MOBIO_Branded_1707_SEA_PowerSoil__&kwid=%2Bpower%20%2Bsoil%20%2Brna	https://github.com/FranckLejzerowicz/protocols	TruSeq_Nano_PCR_free_Library_Preparation_Kit_single-end	uchime_4.2	TRUE	49.7	F1-Q	15-L	TAGATGCAAAGGGCACCACAAGAACGC	CATGCAGTCCACCTATCACACAATCATG	FWD:_{AAGGGCACCACAAGAACGC}_REV:_{CCACCTATCACACAATCATG}	F1-Q_15-L	TAGATGCAAAGGGCACCACAAGAACGC_CATGCAGTCCACCTATCACACAATCATG	DSMP_37F_DNA_A_1_3	18703377	TruSeq	normalized	2017-07-04	TruSeq5	Illumina	HiSeq_2500	none	lane_pool37F	27.5	17.75	4	41	initial_denaturation:95_5;_denaturation:_94_0.5;_annealing:52_0.2;_elongation:_72_1;_40_cycles;_final_elongation:72_2	1.9	14.47	27.49
37F.DNA.206.B	CCGGCCGG	CCGGCCGG	18S_rRNA	37F	37F	DNA	206	B	No	MIMARKS-survey	DSMP	gene|marine_metagenome|uncultured_microorganism|uncultured_organism|ecotype|biological_replicate|technical_replicate|interspecies_interaction_between_organisms	0	marine_abyssal_zone_biome	marine_oligotrophic_desert	mud	sediment	aerobe	https://www.qiagen.com/us/cmp/ecom/powersoilkits?COECM_MOBIO_Branded_1707_SEA_PowerSoil__&kwid=%2Bpower%20%2Bsoil%20%2Brna	https://github.com/FranckLejzerowicz/protocols	TruSeq_Nano_PCR_free_Library_Preparation_Kit_single-end	uchime_4.2	TRUE	49.7	F1-Q	15-L	TAGATGCAAAGGGCACCACAAGAACGC	CATGCAGTCCACCTATCACACAATCATG	FWD:_{AAGGGCACCACAAGAACGC}_REV:_{CCACCTATCACACAATCATG}	F1-Q_15-L	TAGATGCAAAGGGCACCACAAGAACGC_CATGCAGTCCACCTATCACACAATCATG	DSMP_37F_DNA_B_1_1	2278945	TruSeq	normalized	2017-07-04	TruSeq8	Illumina	HiSeq_2500	none	lane_pool37F	40	337.28	4	42	initial_denaturation:95_5;_denaturation:_94_0.5;_annealing:52_0.2;_elongation:_72_1;_40_cycles;_final_elongation:72_2	3.3	12.12	40
37F.DNA.207.A	CCGGCCGT	CCGGCCGT	18S_rRNA	37F	37F	DNA	207	A	No	MIMARKS-survey	DSMP	gene|marine_metagenome|uncultured_microorganism|uncultured_organism|ecotype|biological_replicate|technical_replicate|interspecies_interaction_between_organisms	0	marine_abyssal_zone_biome	marine_oligotrophic_desert	mud	sediment	aerobe	https://www.qiagen.com/us/cmp/ecom/powersoilkits?COECM_MOBIO_Branded_1707_SEA_PowerSoil__&kwid=%2Bpower%20%2Bsoil%20%2Brna	https://github.com/FranckLejzerowicz/protocols	TruSeq_Nano_PCR_free_Library_Preparation_Kit_single-end	uchime_4.2	TRUE	93	F1-Q	15-P	TAGATGCAAAGGGCACCACAAGAACGC	CTAGCATCCCACCTATCACACAATCATG	FWD:_{AAGGGCACCACAAGAACGC}_REV:_{CCACCTATCACACAATCATG}	F1-Q_15-P	TAGATGCAAAGGGCACCACAAGAACGC_CTAGCATCCCACCTATCACACAATCATG	DSMP_37F_DNA_A_1_1	15294031	TruSeq	normalized	2017-07-04	TruSeq1	Illumina	HiSeq_2500	none	lane_pool37F	30	22.46	4	42	initial_denaturation:95_5;_denaturation:_94_0.5;_annealing:52_0.2;_elongation:_72_1;_40_cycles;_final_elongation:72_2	3.6	8.33	29.99
37F.DNA.207.B	CCGGCCTC	CCGGCCTC	18S_rRNA	37F	37F	DNA	207	B	No	MIMARKS-survey	DSMP	gene|marine_metagenome|uncultured_microorganism|uncultured_organism|ecotype|biological_replicate|technical_replicate|interspecies_interaction_between_organisms	0	marine_abyssal_zone_biome	marine_oligotrophic_desert	mud	sediment	aerobe	https://www.qiagen.com/us/cmp/ecom/powersoilkits?COECM_MOBIO_Branded_1707_SEA_PowerSoil__&kwid=%2Bpower%20%2Bsoil%20%2Brna	https://github.com/FranckLejzerowicz/protocols	TruSeq_Nano_PCR_free_Library_Preparation_Kit_single-end	uchime_4.2	TRUE	93	F1-Q	15-P	TAGATGCAAAGGGCACCACAAGAACGC	CTAGCATCCCACCTATCACACAATCATG	FWD:_{AAGGGCACCACAAGAACGC}_REV:_{CCACCTATCACACAATCATG}	F1-Q_15-P	TAGATGCAAAGGGCACCACAAGAACGC_CTAGCATCCCACCTATCACACAATCATG	DSMP_37F_DNA_B_1_2	2198874	TruSeq	normalized	2017-07-04	TruSeq9	Illumina	HiSeq_2500	none	lane_pool37F	40	307.78	4	42	initial_denaturation:95_5;_denaturation:_94_0.5;_annealing:52_0.2;_elongation:_72_1;_40_cycles;_final_elongation:72_2	4.2	9.52	39.98
37F.DNA.208.A	CCGGCCTG	CCGGCCTG	18S_rRNA	37F	37F	DNA	208	A	No	MIMARKS-survey	DSMP	gene|marine_metagenome|uncultured_microorganism|uncultured_organism|ecotype|biological_replicate|technical_replicate|interspecies_interaction_between_organisms	0	marine_abyssal_zone_biome	marine_oligotrophic_desert	mud	sediment	aerobe	https://www.qiagen.com/us/cmp/ecom/powersoilkits?COECM_MOBIO_Branded_1707_SEA_PowerSoil__&kwid=%2Bpower%20%2Bsoil%20%2Brna	https://github.com/FranckLejzerowicz/protocols	TruSeq_Nano_PCR_free_Library_Preparation_Kit_single-end	uchime_4.2	TRUE	124	F1-Q	15-S	TAGATGCAAAGGGCACCACAAGAACGC	TAGCATGTCCACCTATCACACAATCATG	FWD:_{AAGGGCACCACAAGAACGC}_REV:_{CCACCTATCACACAATCATG}	F1-Q_15-S	TAGATGCAAAGGGCACCACAAGAACGC_TAGCATGTCCACCTATCACACAATCATG	DSMP_37F_DNA_A_1_1	15294031	TruSeq	normalized	2017-07-04	TruSeq1	Illumina	HiSeq_2500	none	lane_pool37F	30	22.46	4	42	initial_denaturation:95_5;_denaturation:_94_0.5;_annealing:52_0.2;_elongation:_72_1;_40_cycles;_final_elongation:72_2	1.6	18.75	30
37F.DNA.208.B	CCGGCCTT	CCGGCCTT	18S_rRNA	37F	37F	DNA	208	B	No	MIMARKS-survey	DSMP	gene|marine_metagenome|uncultured_microorganism|uncultured_organism|ecotype|biological_replicate|technical_replicate|interspecies_interaction_between_organisms	0	marine_abyssal_zone_biome	marine_oligotrophic_desert	mud	sediment	aerobe	https://www.qiagen.com/us/cmp/ecom/powersoilkits?COECM_MOBIO_Branded_1707_SEA_PowerSoil__&kwid=%2Bpower%20%2Bsoil%20%2Brna	https://github.com/FranckLejzerowicz/protocols	TruSeq_Nano_PCR_free_Library_Preparation_Kit_single-end	uchime_4.2	TRUE	124	F1-Q	15-S	TAGATGCAAAGGGCACCACAAGAACGC	TAGCATGTCCACCTATCACACAATCATG	FWD:_{AAGGGCACCACAAGAACGC}_REV:_{CCACCTATCACACAATCATG}	F1-Q_15-S	TAGATGCAAAGGGCACCACAAGAACGC_TAGCATGTCCACCTATCACACAATCATG	DSMP_37F_DNA_B_1_1	2278945	TruSeq	normalized	2017-07-04	TruSeq8	Illumina	HiSeq_2500	none	lane_pool37F	40	337.28	4	42	initial_denaturation:95_5;_denaturation:_94_0.5;_annealing:52_0.2;_elongation:_72_1;_40_cycles;_final_elongation:72_2	1.6	25	40
37F.DNA.209.A	CCGGCGCC	CCGGCGCC	18S_rRNA	37F	37F	DNA	209	A	No	MIMARKS-survey	DSMP	gene|marine_metagenome|uncultured_microorganism|uncultured_organism|ecotype|biological_replicate|technical_replicate|interspecies_interaction_between_organisms	0	marine_abyssal_zone_biome	marine_oligotrophic_desert	mud	sediment	aerobe	https://www.qiagen.com/us/cmp/ecom/powersoilkits?COECM_MOBIO_Branded_1707_SEA_PowerSoil__&kwid=%2Bpower%20%2Bsoil%20%2Brna	https://github.com/FranckLejzerowicz/protocols	TruSeq_Nano_PCR_free_Library_Preparation_Kit_single-end	uchime_4.2	TRUE	52	F1-Q	15-T	TAGATGCAAAGGGCACCACAAGAACGC	TAGTGAGCCCACCTATCACACAATCATG	FWD:_{AAGGGCACCACAAGAACGC}_REV:_{CCACCTATCACACAATCATG}	F1-Q_15-T	TAGATGCAAAGGGCACCACAAGAACGC_TAGTGAGCCCACCTATCACACAATCATG	DSMP_37F_DNA_A_1_2	15316119	TruSeq	normalized	2017-07-04	TruSeq4	Illumina	HiSeq_2500	none	lane_pool37F	27	20.04	4	42	initial_denaturation:95_5;_denaturation:_94_0.5;_annealing:52_0.2;_elongation:_72_1;_40_cycles;_final_elongation:72_2	2.9	9.31	27
37F.DNA.209.B	CCGGCGCG	CCGGCGCG	18S_rRNA	37F	37F	DNA	209	B	No	MIMARKS-survey	DSMP	gene|marine_metagenome|uncultured_microorganism|uncultured_organism|ecotype|biological_replicate|technical_replicate|interspecies_interaction_between_organisms	0	marine_abyssal_zone_biome	marine_oligotrophic_desert	mud	sediment	aerobe	https://www.qiagen.com/us/cmp/ecom/powersoilkits?COECM_MOBIO_Branded_1707_SEA_PowerSoil__&kwid=%2Bpower%20%2Bsoil%20%2Brna	https://github.com/FranckLejzerowicz/protocols	TruSeq_Nano_PCR_free_Library_Preparation_Kit_single-end	uchime_4.2	TRUE	52	F1-Q	15-T	TAGATGCAAAGGGCACCACAAGAACGC	TAGTGAGCCCACCTATCACACAATCATG	FWD:_{AAGGGCACCACAAGAACGC}_REV:_{CCACCTATCACACAATCATG}	F1-Q_15-T	TAGATGCAAAGGGCACCACAAGAACGC_TAGTGAGCCCACCTATCACACAATCATG	DSMP_37F_DNA_B_1_2	2198874	TruSeq	normalized	2017-07-04	TruSeq9	Illumina	HiSeq_2500	none	lane_pool37F	40	307.78	4	42	initial_denaturation:95_5;_denaturation:_94_0.5;_annealing:52_0.2;_elongation:_72_1;_40_cycles;_final_elongation:72_2	2.5	16	40
37F.DNA.210.A	CCGGCGCT	CCGGCGCT	18S_rRNA	37F	37F	DNA	210	A	No	MIMARKS-survey	DSMP	gene|marine_metagenome|uncultured_microorganism|uncultured_organism|ecotype|biological_replicate|technical_replicate|interspecies_interaction_between_organisms	0	marine_abyssal_zone_biome	marine_oligotrophic_desert	mud	sediment	aerobe	https://www.qiagen.com/us/cmp/ecom/powersoilkits?COECM_MOBIO_Branded_1707_SEA_PowerSoil__&kwid=%2Bpower%20%2Bsoil%20%2Brna	https://github.com/FranckLejzerowicz/protocols	TruSeq_Nano_PCR_free_Library_Preparation_Kit_single-end	uchime_4.2	TRUE	47	F1-Q	15-W	TAGATGCAAAGGGCACCACAAGAACGC	TGATATGCCCACCTATCACACAATCATG	FWD:_{AAGGGCACCACAAGAACGC}_REV:_{CCACCTATCACACAATCATG}	F1-Q_15-W	TAGATGCAAAGGGCACCACAAGAACGC_TGATATGCCCACCTATCACACAATCATG	DSMP_37F_DNA_A_1_3	18703377	TruSeq	normalized	2017-07-04	TruSeq5	Illumina	HiSeq_2500	none	lane_pool37F	27.5	17.75	4	41	initial_denaturation:95_5;_denaturation:_94_0.5;_annealing:52_0.2;_elongation:_72_1;_40_cycles;_final_elongation:72_2	1.9	14.47	27.49
37F.DNA.210.B	CCGGCGGC	CCGGCGGC	18S_rRNA	37F	37F	DNA	210	B	No	MIMARKS-survey	DSMP	gene|marine_metagenome|uncultured_microorganism|uncultured_organism|ecotype|biological_replicate|technical_replicate|interspecies_interaction_between_organisms	0	marine_abyssal_zone_biome	marine_oligotrophic_desert	mud	sediment	aerobe	https://www.qiagen.com/us/cmp/ecom/powersoilkits?COECM_MOBIO_Branded_1707_SEA_PowerSoil__&kwid=%2Bpower%20%2Bsoil%20%2Brna	https://github.com/FranckLejzerowicz/protocols	TruSeq_Nano_PCR_free_Library_Preparation_Kit_single-end	uchime_4.2	TRUE	47	F1-Q	15-W	TAGATGCAAAGGGCACCACAAGAACGC	TGATATGCCCACCTATCACACAATCATG	FWD:_{AAGGGCACCACAAGAACGC}_REV:_{CCACCTATCACACAATCATG}	F1-Q_15-W	TAGATGCAAAGGGCACCACAAGAACGC_TGATATGCCCACCTATCACACAATCATG	DSMP_37F_DNA_B_1_3	1877212	TruSeq	normalized	2017-07-04	TruSeq10	Illumina	HiSeq_2500	none	lane_pool37F	40	535.96	4	41	initial_denaturation:95_5;_denaturation:_94_0.5;_annealing:52_0.2;_elongation:_72_1;_40_cycles;_final_elongation:72_2	2.6	15.38	39.99
37F.DNA.211.A	CCGGCGGG	CCGGCGGG	18S_rRNA	37F	37F	DNA	211	A	No	MIMARKS-survey	DSMP	gene|marine_metagenome|uncultured_microorganism|uncultured_organism|ecotype|biological_replicate|technical_replicate|interspecies_interaction_between_organisms	0	marine_abyssal_zone_biome	marine_oligotrophic_desert	mud	sediment	aerobe	https://www.qiagen.com/us/cmp/ecom/powersoilkits?COECM_MOBIO_Branded_1707_SEA_PowerSoil__&kwid=%2Bpower%20%2Bsoil%20%2Brna	https://github.com/FranckLejzerowicz/protocols	TruSeq_Nano_PCR_free_Library_Preparation_Kit_single-end	uchime_4.2	TRUE	48.9	F1-R	15-G	TAGCTATCAAGGGCACCACAAGAACGC	ATGCGTAGCCACCTATCACACAATCATG	FWD:_{AAGGGCACCACAAGAACGC}_REV:_{CCACCTATCACACAATCATG}	F1-R_15-G	TAGCTATCAAGGGCACCACAAGAACGC_ATGCGTAGCCACCTATCACACAATCATG	DSMP_37F_DNA_A_1_3	18703377	TruSeq	normalized	2017-07-04	TruSeq5	Illumina	HiSeq_2500	none	lane_pool37F	27.5	17.75	4	41	initial_denaturation:95_5;_denaturation:_94_0.5;_annealing:52_0.2;_elongation:_72_1;_40_cycles;_final_elongation:72_2	2	13.75	27.5
37F.DNA.211.B	CCGGCGGT	CCGGCGGT	18S_rRNA	37F	37F	DNA	211	B	No	MIMARKS-survey	DSMP	gene|marine_metagenome|uncultured_microorganism|uncultured_organism|ecotype|biological_replicate|technical_replicate|interspecies_interaction_between_organisms	0	marine_abyssal_zone_biome	marine_oligotrophic_desert	mud	sediment	aerobe	https://www.qiagen.com/us/cmp/ecom/powersoilkits?COECM_MOBIO_Branded_1707_SEA_PowerSoil__&kwid=%2Bpower%20%2Bsoil%20%2Brna	https://github.com/FranckLejzerowicz/protocols	TruSeq_Nano_PCR_free_Library_Preparation_Kit_single-end	uchime_4.2	TRUE	48.9	F1-R	15-G	TAGCTATCAAGGGCACCACAAGAACGC	ATGCGTAGCCACCTATCACACAATCATG	FWD:_{AAGGGCACCACAAGAACGC}_REV:_{CCACCTATCACACAATCATG}	F1-R_15-G	TAGCTATCAAGGGCACCACAAGAACGC_ATGCGTAGCCACCTATCACACAATCATG	DSMP_37F_DNA_B_1_3	1877212	TruSeq	normalized	2017-07-04	TruSeq10	Illumina	HiSeq_2500	none	lane_pool37F	40	535.96	4	41	initial_denaturation:95_5;_denaturation:_94_0.5;_annealing:52_0.2;_elongation:_72_1;_40_cycles;_final_elongation:72_2	2	20	40
37F.DNA.212.A	CCGGCGTC	CCGGCGTC	18S_rRNA	37F	37F	DNA	212	A	No	MIMARKS-survey	DSMP	gene|marine_metagenome|uncultured_microorganism|uncultured_organism|ecotype|biological_replicate|technical_replicate|interspecies_interaction_between_organisms	0	marine_abyssal_zone_biome	marine_oligotrophic_desert	mud	sediment	aerobe	https://www.qiagen.com/us/cmp/ecom/powersoilkits?COECM_MOBIO_Branded_1707_SEA_PowerSoil__&kwid=%2Bpower%20%2Bsoil%20%2Brna	https://github.com/FranckLejzerowicz/protocols	TruSeq_Nano_PCR_free_Library_Preparation_Kit_single-end	uchime_4.2	TRUE	43.9	F1-R	15-H	TAGCTATCAAGGGCACCACAAGAACGC	ATGTCAGTCCACCTATCACACAATCATG	FWD:_{AAGGGCACCACAAGAACGC}_REV:_{CCACCTATCACACAATCATG}	F1-R_15-H	TAGCTATCAAGGGCACCACAAGAACGC_ATGTCAGTCCACCTATCACACAATCATG	DSMP_37F_DNA_A_1_2	15316119	TruSeq	normalized	2017-07-04	TruSeq4	Illumina	HiSeq_2500	none	lane_pool37F	27	20.04	4	42	initial_denaturation:95_5;_denaturation:_94_0.5;_annealing:52_0.2;_elongation:_72_1;_40_cycles;_final_elongation:72_2	1.8	15	27
37F.DNA.212.B	CCGGCGTG	CCGGCGTG	18S_rRNA	37F	37F	DNA	212	B	No	MIMARKS-survey	DSMP	gene|marine_metagenome|uncultured_microorganism|uncultured_organism|ecotype|biological_replicate|technical_replicate|interspecies_interaction_between_organisms	0	marine_abyssal_zone_biome	marine_oligotrophic_desert	mud	sediment	aerobe	https://www.qiagen.com/us/cmp/ecom/powersoilkits?COECM_MOBIO_Branded_1707_SEA_PowerSoil__&kwid=%2Bpower%20%2Bsoil%20%2Brna	https://github.com/FranckLejzerowicz/protocols	TruSeq_Nano_PCR_free_Library_Preparation_Kit_single-end	uchime_4.2	TRUE	43.9	F1-R	15-H	TAGCTATCAAGGGCACCACAAGAACGC	ATGTCAGTCCACCTATCACACAATCATG	FWD:_{AAGGGCACCACAAGAACGC}_REV:_{CCACCTATCACACAATCATG}	F1-R_15-H	TAGCTATCAAGGGCACCACAAGAACGC_ATGTCAGTCCACCTATCACACAATCATG	DSMP_37F_DNA_B_1_2	2198874	TruSeq	normalized	2017-07-04	TruSeq9	Illumina	HiSeq_2500	none	lane_pool37F	40	307.78	4	42	initial_denaturation:95_5;_denaturation:_94_0.5;_annealing:52_0.2;_elongation:_72_1;_40_cycles;_final_elongation:72_2	2.2	18.18	40
37F.DNA.213.A	CCGGCGTT	CCGGCGTT	18S_rRNA	37F	37F	DNA	213	A	No	MIMARKS-survey	DSMP	gene|marine_metagenome|uncultured_microorganism|uncultured_organism|ecotype|biological_replicate|technical_replicate|interspecies_interaction_between_organisms	0	marine_abyssal_zone_biome	marine_oligotrophic_desert	mud	sediment	aerobe	https://www.qiagen.com/us/cmp/ecom/powersoilkits?COECM_MOBIO_Branded_1707_SEA_PowerSoil__&kwid=%2Bpower%20%2Bsoil%20%2Brna	https://github.com/FranckLejzerowicz/protocols	TruSeq_Nano_PCR_free_Library_Preparation_Kit_single-end	uchime_4.2	TRUE	47.3	F1-R	15-L	TAGCTATCAAGGGCACCACAAGAACGC	CATGCAGTCCACCTATCACACAATCATG	FWD:_{AAGGGCACCACAAGAACGC}_REV:_{CCACCTATCACACAATCATG}	F1-R_15-L	TAGCTATCAAGGGCACCACAAGAACGC_CATGCAGTCCACCTATCACACAATCATG	DSMP_37F_DNA_A_1_1	15294031	TruSeq	normalized	2017-07-04	TruSeq1	Illumina	HiSeq_2500	none	lane_pool37F	30	22.46	4	42	initial_denaturation:95_5;_denaturation:_94_0.5;_annealing:52_0.2;_elongation:_72_1;_40_cycles;_final_elongation:72_2	2	15	30
37F.DNA.213.B	CCGGCTCC	CCGGCTCC	18S_rRNA	37F	37F	DNA	213	B	No	MIMARKS-survey	DSMP	gene|marine_metagenome|uncultured_microorganism|uncultured_organism|ecotype|biological_replicate|technical_replicate|interspecies_interaction_between_organisms	0	marine_abyssal_zone_biome	marine_oligotrophic_desert	mud	sediment	aerobe	https://www.qiagen.com/us/cmp/ecom/powersoilkits?COECM_MOBIO_Branded_1707_SEA_PowerSoil__&kwid=%2Bpower%20%2Bsoil%20%2Brna	https://github.com/FranckLejzerowicz/protocols	TruSeq_Nano_PCR_free_Library_Preparation_Kit_single-end	uchime_4.2	TRUE	47.3	F1-R	15-L	TAGCTATCAAGGGCACCACAAGAACGC	CATGCAGTCCACCTATCACACAATCATG	FWD:_{AAGGGCACCACAAGAACGC}_REV:_{CCACCTATCACACAATCATG}	F1-R_15-L	TAGCTATCAAGGGCACCACAAGAACGC_CATGCAGTCCACCTATCACACAATCATG	DSMP_37F_DNA_B_1_3	1877212	TruSeq	normalized	2017-07-04	TruSeq10	Illumina	HiSeq_2500	none	lane_pool37F	40	535.96	4	41	initial_denaturation:95_5;_denaturation:_94_0.5;_annealing:52_0.2;_elongation:_72_1;_40_cycles;_final_elongation:72_2	1.56	25.64	40
37F.DNA.214.A	CCGGCTCG	CCGGCTCG	18S_rRNA	37F	37F	DNA	214	A	No	MIMARKS-survey	DSMP	gene|marine_metagenome|uncultured_microorganism|uncultured_organism|ecotype|biological_replicate|technical_replicate|interspecies_interaction_between_organisms	0	marine_abyssal_zone_biome	marine_oligotrophic_desert	mud	sediment	aerobe	https://www.qiagen.com/us/cmp/ecom/powersoilkits?COECM_MOBIO_Branded_1707_SEA_PowerSoil__&kwid=%2Bpower%20%2Bsoil%20%2Brna	https://github.com/FranckLejzerowicz/protocols	TruSeq_Nano_PCR_free_Library_Preparation_Kit_single-end	uchime_4.2	TRUE	47.1	F1-R	15-M	TAGCTATCAAGGGCACCACAAGAACGC	CGACGAGCCCACCTATCACACAATCATG	FWD:_{AAGGGCACCACAAGAACGC}_REV:_{CCACCTATCACACAATCATG}	F1-R_15-M	TAGCTATCAAGGGCACCACAAGAACGC_CGACGAGCCCACCTATCACACAATCATG	DSMP_37F_DNA_A_1_2	15316119	TruSeq	normalized	2017-07-04	TruSeq4	Illumina	HiSeq_2500	none	lane_pool37F	27	20.04	4	42	initial_denaturation:95_5;_denaturation:_94_0.5;_annealing:52_0.2;_elongation:_72_1;_40_cycles;_final_elongation:72_2	2.9	9.31	27
37F.DNA.214.B	CCGGCTCT	CCGGCTCT	18S_rRNA	37F	37F	DNA	214	B	No	MIMARKS-survey	DSMP	gene|marine_metagenome|uncultured_microorganism|uncultured_organism|ecotype|biological_replicate|technical_replicate|interspecies_interaction_between_organisms	0	marine_abyssal_zone_biome	marine_oligotrophic_desert	mud	sediment	aerobe	https://www.qiagen.com/us/cmp/ecom/powersoilkits?COECM_MOBIO_Branded_1707_SEA_PowerSoil__&kwid=%2Bpower%20%2Bsoil%20%2Brna	https://github.com/FranckLejzerowicz/protocols	TruSeq_Nano_PCR_free_Library_Preparation_Kit_single-end	uchime_4.2	TRUE	47.1	F1-R	15-M	TAGCTATCAAGGGCACCACAAGAACGC	CGACGAGCCCACCTATCACACAATCATG	FWD:_{AAGGGCACCACAAGAACGC}_REV:_{CCACCTATCACACAATCATG}	F1-R_15-M	TAGCTATCAAGGGCACCACAAGAACGC_CGACGAGCCCACCTATCACACAATCATG	DSMP_37F_DNA_B_1_2	2198874	TruSeq	normalized	2017-07-04	TruSeq9	Illumina	HiSeq_2500	none	lane_pool37F	40	307.78	4	42	initial_denaturation:95_5;_denaturation:_94_0.5;_annealing:52_0.2;_elongation:_72_1;_40_cycles;_final_elongation:72_2	3	13.33	39.99
37F.DNA.217.A	CCGGCTTG	CCGGCTTG	18S_rRNA	37F	37F	DNA	217	A	No	MIMARKS-survey	DSMP	gene|marine_metagenome|uncultured_microorganism|uncultured_organism|ecotype|biological_replicate|technical_replicate|interspecies_interaction_between_organisms	0	marine_abyssal_zone_biome	marine_oligotrophic_desert	mud	sediment	aerobe	https://www.qiagen.com/us/cmp/ecom/powersoilkits?COECM_MOBIO_Branded_1707_SEA_PowerSoil__&kwid=%2Bpower%20%2Bsoil%20%2Brna	https://github.com/FranckLejzerowicz/protocols	TruSeq_Nano_PCR_free_Library_Preparation_Kit_single-end	uchime_4.2	TRUE	35.3	F1-S	15-A	TAGTGACTAAGGGCACCACAAGAACGC	AGACACACCCACCTATCACACAATCATG	FWD:_{AAGGGCACCACAAGAACGC}_REV:_{CCACCTATCACACAATCATG}	F1-S_15-A	TAGTGACTAAGGGCACCACAAGAACGC_AGACACACCCACCTATCACACAATCATG	DSMP_37F_DNA_A_1_2	15316119	TruSeq	normalized	2017-07-04	TruSeq4	Illumina	HiSeq_2500	none	lane_pool37F	27	20.04	4	42	initial_denaturation:95_5;_denaturation:_94_0.5;_annealing:52_0.2;_elongation:_72_1;_40_cycles;_final_elongation:72_2	1.12	24.11	27
37F.DNA.217.B	CCGGCTTT	CCGGCTTT	18S_rRNA	37F	37F	DNA	217	B	No	MIMARKS-survey	DSMP	gene|marine_metagenome|uncultured_microorganism|uncultured_organism|ecotype|biological_replicate|technical_replicate|interspecies_interaction_between_organisms	0	marine_abyssal_zone_biome	marine_oligotrophic_desert	mud	sediment	aerobe	https://www.qiagen.com/us/cmp/ecom/powersoilkits?COECM_MOBIO_Branded_1707_SEA_PowerSoil__&kwid=%2Bpower%20%2Bsoil%20%2Brna	https://github.com/FranckLejzerowicz/protocols	TruSeq_Nano_PCR_free_Library_Preparation_Kit_single-end	uchime_4.2	TRUE	35.3	F1-S	15-A	TAGTGACTAAGGGCACCACAAGAACGC	AGACACACCCACCTATCACACAATCATG	FWD:_{AAGGGCACCACAAGAACGC}_REV:_{CCACCTATCACACAATCATG}	F1-S_15-A	TAGTGACTAAGGGCACCACAAGAACGC_AGACACACCCACCTATCACACAATCATG	DSMP_37F_DNA_B_1_3	1877212	TruSeq	normalized	2017-07-04	TruSeq10	Illumina	HiSeq_2500	none	lane_pool37F	40	535.96	4	41	initial_denaturation:95_5;_denaturation:_94_0.5;_annealing:52_0.2;_elongation:_72_1;_40_cycles;_final_elongation:72_2	1.12	50	56
37F.DNA.218.A	CCGGGCCC	CCGGGCCC	18S_rRNA	37F	37F	DNA	218	A	No	MIMARKS-survey	DSMP	gene|marine_metagenome|uncultured_microorganism|uncultured_organism|ecotype|biological_replicate|technical_replicate|interspecies_interaction_between_organisms	0	marine_abyssal_zone_biome	marine_oligotrophic_desert	mud	sediment	aerobe	https://www.qiagen.com/us/cmp/ecom/powersoilkits?COECM_MOBIO_Branded_1707_SEA_PowerSoil__&kwid=%2Bpower%20%2Bsoil%20%2Brna	https://github.com/FranckLejzerowicz/protocols	TruSeq_Nano_PCR_free_Library_Preparation_Kit_single-end	uchime_4.2	TRUE	40.2	F1-S	15-K	TAGTGACTAAGGGCACCACAAGAACGC	CATCGTACCCACCTATCACACAATCATG	FWD:_{AAGGGCACCACAAGAACGC}_REV:_{CCACCTATCACACAATCATG}	F1-S_15-K	TAGTGACTAAGGGCACCACAAGAACGC_CATCGTACCCACCTATCACACAATCATG	DSMP_37F_DNA_A_1_3	18703377	TruSeq	normalized	2017-07-04	TruSeq5	Illumina	HiSeq_2500	none	lane_pool37F	27.5	17.75	4	41	initial_denaturation:95_5;_denaturation:_94_0.5;_annealing:52_0.2;_elongation:_72_1;_40_cycles;_final_elongation:72_2	1.68	16.37	27.5
37F.DNA.218.B	CCGGGCCG	CCGGGCCG	18S_rRNA	37F	37F	DNA	218	B	No	MIMARKS-survey	DSMP	gene|marine_metagenome|uncultured_microorganism|uncultured_organism|ecotype|biological_replicate|technical_replicate|interspecies_interaction_between_organisms	0	marine_abyssal_zone_biome	marine_oligotrophic_desert	mud	sediment	aerobe	https://www.qiagen.com/us/cmp/ecom/powersoilkits?COECM_MOBIO_Branded_1707_SEA_PowerSoil__&kwid=%2Bpower%20%2Bsoil%20%2Brna	https://github.com/FranckLejzerowicz/protocols	TruSeq_Nano_PCR_free_Library_Preparation_Kit_single-end	uchime_4.2	TRUE	40.2	F1-S	15-K	TAGTGACTAAGGGCACCACAAGAACGC	CATCGTACCCACCTATCACACAATCATG	FWD:_{AAGGGCACCACAAGAACGC}_REV:_{CCACCTATCACACAATCATG}	F1-S_15-K	TAGTGACTAAGGGCACCACAAGAACGC_CATCGTACCCACCTATCACACAATCATG	DSMP_37F_DNA_B_1_2	2198874	TruSeq	normalized	2017-07-04	TruSeq9	Illumina	HiSeq_2500	none	lane_pool37F	40	307.78	4	42	initial_denaturation:95_5;_denaturation:_94_0.5;_annealing:52_0.2;_elongation:_72_1;_40_cycles;_final_elongation:72_2	1.64	24.39	40
37F.DNA.219.A	CCGGGCCT	CCGGGCCT	18S_rRNA	37F	37F	DNA	219	A	No	MIMARKS-survey	DSMP	gene|marine_metagenome|uncultured_microorganism|uncultured_organism|ecotype|biological_replicate|technical_replicate|interspecies_interaction_between_organisms	0	marine_abyssal_zone_biome	marine_oligotrophic_desert	mud	sediment	aerobe	https://www.qiagen.com/us/cmp/ecom/powersoilkits?COECM_MOBIO_Branded_1707_SEA_PowerSoil__&kwid=%2Bpower%20%2Bsoil%20%2Brna	https://github.com/FranckLejzerowicz/protocols	TruSeq_Nano_PCR_free_Library_Preparation_Kit_single-end	uchime_4.2	TRUE	39.2	F1-S	15-N	TAGTGACTAAGGGCACCACAAGAACGC	CGAGACGTCCACCTATCACACAATCATG	FWD:_{AAGGGCACCACAAGAACGC}_REV:_{CCACCTATCACACAATCATG}	F1-S_15-N	TAGTGACTAAGGGCACCACAAGAACGC_CGAGACGTCCACCTATCACACAATCATG	DSMP_37F_DNA_A_1_3	18703377	TruSeq	normalized	2017-07-04	TruSeq5	Illumina	HiSeq_2500	none	lane_pool37F	27.5	17.75	4	41	initial_denaturation:95_5;_denaturation:_94_0.5;_annealing:52_0.2;_elongation:_72_1;_40_cycles;_final_elongation:72_2	2.6	10.58	27.51
37F.DNA.219.B	CCGGGCGC	CCGGGCGC	18S_rRNA	37F	37F	DNA	219	B	No	MIMARKS-survey	DSMP	gene|marine_metagenome|uncultured_microorganism|uncultured_organism|ecotype|biological_replicate|technical_replicate|interspecies_interaction_between_organisms	0	marine_abyssal_zone_biome	marine_oligotrophic_desert	mud	sediment	aerobe	https://www.qiagen.com/us/cmp/ecom/powersoilkits?COECM_MOBIO_Branded_1707_SEA_PowerSoil__&kwid=%2Bpower%20%2Bsoil%20%2Brna	https://github.com/FranckLejzerowicz/protocols	TruSeq_Nano_PCR_free_Library_Preparation_Kit_single-end	uchime_4.2	TRUE	39.2	F1-S	15-N	TAGTGACTAAGGGCACCACAAGAACGC	CGAGACGTCCACCTATCACACAATCATG	FWD:_{AAGGGCACCACAAGAACGC}_REV:_{CCACCTATCACACAATCATG}	F1-S_15-N	TAGTGACTAAGGGCACCACAAGAACGC_CGAGACGTCCACCTATCACACAATCATG	DSMP_37F_DNA_B_1_2	2198874	TruSeq	normalized	2017-07-04	TruSeq9	Illumina	HiSeq_2500	none	lane_pool37F	40	307.78	4	42	initial_denaturation:95_5;_denaturation:_94_0.5;_annealing:52_0.2;_elongation:_72_1;_40_cycles;_final_elongation:72_2	4.3	9.3	39.99
37F.DNA.220.A	CCGGGCGG	CCGGGCGG	18S_rRNA	37F	37F	DNA	220	A	No	MIMARKS-survey	DSMP	gene|marine_metagenome|uncultured_microorganism|uncultured_organism|ecotype|biological_replicate|technical_replicate|interspecies_interaction_between_organisms	0	marine_abyssal_zone_biome	marine_oligotrophic_desert	mud	sediment	aerobe	https://www.qiagen.com/us/cmp/ecom/powersoilkits?COECM_MOBIO_Branded_1707_SEA_PowerSoil__&kwid=%2Bpower%20%2Bsoil%20%2Brna	https://github.com/FranckLejzerowicz/protocols	TruSeq_Nano_PCR_free_Library_Preparation_Kit_single-end	uchime_4.2	TRUE	61	F1-S	15-Q	TAGTGACTAAGGGCACCACAAGAACGC	CTGCACGCCCACCTATCACACAATCATG	FWD:_{AAGGGCACCACAAGAACGC}_REV:_{CCACCTATCACACAATCATG}	F1-S_15-Q	TAGTGACTAAGGGCACCACAAGAACGC_CTGCACGCCCACCTATCACACAATCATG	DSMP_37F_DNA_A_1_1	15294031	TruSeq	normalized	2017-07-04	TruSeq1	Illumina	HiSeq_2500	none	lane_pool37F	30	22.46	4	42	initial_denaturation:95_5;_denaturation:_94_0.5;_annealing:52_0.2;_elongation:_72_1;_40_cycles;_final_elongation:72_2	2	15	30
37F.DNA.220.B	CCGGGCGT	CCGGGCGT	18S_rRNA	37F	37F	DNA	220	B	No	MIMARKS-survey	DSMP	gene|marine_metagenome|uncultured_microorganism|uncultured_organism|ecotype|biological_replicate|technical_replicate|interspecies_interaction_between_organisms	0	marine_abyssal_zone_biome	marine_oligotrophic_desert	mud	sediment	aerobe	https://www.qiagen.com/us/cmp/ecom/powersoilkits?COECM_MOBIO_Branded_1707_SEA_PowerSoil__&kwid=%2Bpower%20%2Bsoil%20%2Brna	https://github.com/FranckLejzerowicz/protocols	TruSeq_Nano_PCR_free_Library_Preparation_Kit_single-end	uchime_4.2	TRUE	61	F1-S	15-Q	TAGTGACTAAGGGCACCACAAGAACGC	CTGCACGCCCACCTATCACACAATCATG	FWD:_{AAGGGCACCACAAGAACGC}_REV:_{CCACCTATCACACAATCATG}	F1-S_15-Q	TAGTGACTAAGGGCACCACAAGAACGC_CTGCACGCCCACCTATCACACAATCATG	DSMP_37F_DNA_B_1_3	1877212	TruSeq	normalized	2017-07-04	TruSeq10	Illumina	HiSeq_2500	none	lane_pool37F	40	535.96	4	41	initial_denaturation:95_5;_denaturation:_94_0.5;_annealing:52_0.2;_elongation:_72_1;_40_cycles;_final_elongation:72_2	2.1	19.05	40.01
37F.DNA.221.A	CCGGGCTC	CCGGGCTC	18S_rRNA	37F	37F	DNA	221	A	No	MIMARKS-survey	DSMP	gene|marine_metagenome|uncultured_microorganism|uncultured_organism|ecotype|biological_replicate|technical_replicate|interspecies_interaction_between_organisms	0	marine_abyssal_zone_biome	marine_oligotrophic_desert	mud	sediment	aerobe	https://www.qiagen.com/us/cmp/ecom/powersoilkits?COECM_MOBIO_Branded_1707_SEA_PowerSoil__&kwid=%2Bpower%20%2Bsoil%20%2Brna	https://github.com/FranckLejzerowicz/protocols	TruSeq_Nano_PCR_free_Library_Preparation_Kit_single-end	uchime_4.2	TRUE	47.8	F1-S	15-U	TAGTGACTAAGGGCACCACAAGAACGC	TATCGCTGCCACCTATCACACAATCATG	FWD:_{AAGGGCACCACAAGAACGC}_REV:_{CCACCTATCACACAATCATG}	F1-S_15-U	TAGTGACTAAGGGCACCACAAGAACGC_TATCGCTGCCACCTATCACACAATCATG	DSMP_37F_DNA_A_1_2	15316119	TruSeq	normalized	2017-07-04	TruSeq4	Illumina	HiSeq_2500	none	lane_pool37F	27	20.04	4	42	initial_denaturation:95_5;_denaturation:_94_0.5;_annealing:52_0.2;_elongation:_72_1;_40_cycles;_final_elongation:72_2	0.7	50	35
37F.DNA.221.B	CCGGGCTG	CCGGGCTG	18S_rRNA	37F	37F	DNA	221	B	No	MIMARKS-survey	DSMP	gene|marine_metagenome|uncultured_microorganism|uncultured_organism|ecotype|biological_replicate|technical_replicate|interspecies_interaction_between_organisms	0	marine_abyssal_zone_biome	marine_oligotrophic_desert	mud	sediment	aerobe	https://www.qiagen.com/us/cmp/ecom/powersoilkits?COECM_MOBIO_Branded_1707_SEA_PowerSoil__&kwid=%2Bpower%20%2Bsoil%20%2Brna	https://github.com/FranckLejzerowicz/protocols	TruSeq_Nano_PCR_free_Library_Preparation_Kit_single-end	uchime_4.2	TRUE	47.8	F1-S	15-U	TAGTGACTAAGGGCACCACAAGAACGC	TATCGCTGCCACCTATCACACAATCATG	FWD:_{AAGGGCACCACAAGAACGC}_REV:_{CCACCTATCACACAATCATG}	F1-S_15-U	TAGTGACTAAGGGCACCACAAGAACGC_TATCGCTGCCACCTATCACACAATCATG	DSMP_37F_DNA_B_1_3	1877212	TruSeq	normalized	2017-07-04	TruSeq10	Illumina	HiSeq_2500	none	lane_pool37F	40	535.96	4	41	initial_denaturation:95_5;_denaturation:_94_0.5;_annealing:52_0.2;_elongation:_72_1;_40_cycles;_final_elongation:72_2	0.88	50	44
37F.DNA.222.A	CCGGGCTT	CCGGGCTT	18S_rRNA	37F	37F	DNA	222	A	No	MIMARKS-survey	DSMP	gene|marine_metagenome|uncultured_microorganism|uncultured_organism|ecotype|biological_replicate|technical_replicate|interspecies_interaction_between_organisms	0	marine_abyssal_zone_biome	marine_oligotrophic_desert	mud	sediment	aerobe	https://www.qiagen.com/us/cmp/ecom/powersoilkits?COECM_MOBIO_Branded_1707_SEA_PowerSoil__&kwid=%2Bpower%20%2Bsoil%20%2Brna	https://github.com/FranckLejzerowicz/protocols	TruSeq_Nano_PCR_free_Library_Preparation_Kit_single-end	uchime_4.2	TRUE	48.6	F1-S	15-X	TAGTGACTAAGGGCACCACAAGAACGC	TGATGCATCCACCTATCACACAATCATG	FWD:_{AAGGGCACCACAAGAACGC}_REV:_{CCACCTATCACACAATCATG}	F1-S_15-X	TAGTGACTAAGGGCACCACAAGAACGC_TGATGCATCCACCTATCACACAATCATG	DSMP_37F_DNA_A_1_1	15294031	TruSeq	normalized	2017-07-04	TruSeq1	Illumina	HiSeq_2500	none	lane_pool37F	30	22.46	4	42	initial_denaturation:95_5;_denaturation:_94_0.5;_annealing:52_0.2;_elongation:_72_1;_40_cycles;_final_elongation:72_2	2.8	10.71	29.99
37F.DNA.222.B	CCGGGGCC	CCGGGGCC	18S_rRNA	37F	37F	DNA	222	B	No	MIMARKS-survey	DSMP	gene|marine_metagenome|uncultured_microorganism|uncultured_organism|ecotype|biological_replicate|technical_replicate|interspecies_interaction_between_organisms	0	marine_abyssal_zone_biome	marine_oligotrophic_desert	mud	sediment	aerobe	https://www.qiagen.com/us/cmp/ecom/powersoilkits?COECM_MOBIO_Branded_1707_SEA_PowerSoil__&kwid=%2Bpower%20%2Bsoil%20%2Brna	https://github.com/FranckLejzerowicz/protocols	TruSeq_Nano_PCR_free_Library_Preparation_Kit_single-end	uchime_4.2	TRUE	48.6	F1-S	15-X	TAGTGACTAAGGGCACCACAAGAACGC	TGATGCATCCACCTATCACACAATCATG	FWD:_{AAGGGCACCACAAGAACGC}_REV:_{CCACCTATCACACAATCATG}	F1-S_15-X	TAGTGACTAAGGGCACCACAAGAACGC_TGATGCATCCACCTATCACACAATCATG	DSMP_37F_DNA_B_1_2	2198874	TruSeq	normalized	2017-07-04	TruSeq9	Illumina	HiSeq_2500	none	lane_pool37F	40	307.78	4	42	initial_denaturation:95_5;_denaturation:_94_0.5;_annealing:52_0.2;_elongation:_72_1;_40_cycles;_final_elongation:72_2	3.1	12.9	39.99
37F.DNA.223.A	CCGGGGCG	CCGGGGCG	18S_rRNA	37F	37F	DNA	223	A	No	MIMARKS-survey	DSMP	gene|marine_metagenome|uncultured_microorganism|uncultured_organism|ecotype|biological_replicate|technical_replicate|interspecies_interaction_between_organisms	0	marine_abyssal_zone_biome	marine_oligotrophic_desert	mud	sediment	aerobe	https://www.qiagen.com/us/cmp/ecom/powersoilkits?COECM_MOBIO_Branded_1707_SEA_PowerSoil__&kwid=%2Bpower%20%2Bsoil%20%2Brna	https://github.com/FranckLejzerowicz/protocols	TruSeq_Nano_PCR_free_Library_Preparation_Kit_single-end	uchime_4.2	TRUE	49.1	F1-T	15-B	TCACGATAAAGGGCACCACAAGAACGC	AGATGATGCCACCTATCACACAATCATG	FWD:_{AAGGGCACCACAAGAACGC}_REV:_{CCACCTATCACACAATCATG}	F1-T_15-B	TCACGATAAAGGGCACCACAAGAACGC_AGATGATGCCACCTATCACACAATCATG	DSMP_37F_DNA_A_1_2	15316119	TruSeq	normalized	2017-07-04	TruSeq4	Illumina	HiSeq_2500	none	lane_pool37F	27	20.04	4	42	initial_denaturation:95_5;_denaturation:_94_0.5;_annealing:52_0.2;_elongation:_72_1;_40_cycles;_final_elongation:72_2	2	13.5	27
37F.DNA.223.B	CCGGGGCT	CCGGGGCT	18S_rRNA	37F	37F	DNA	223	B	No	MIMARKS-survey	DSMP	gene|marine_metagenome|uncultured_microorganism|uncultured_organism|ecotype|biological_replicate|technical_replicate|interspecies_interaction_between_organisms	0	marine_abyssal_zone_biome	marine_oligotrophic_desert	mud	sediment	aerobe	https://www.qiagen.com/us/cmp/ecom/powersoilkits?COECM_MOBIO_Branded_1707_SEA_PowerSoil__&kwid=%2Bpower%20%2Bsoil%20%2Brna	https://github.com/FranckLejzerowicz/protocols	TruSeq_Nano_PCR_free_Library_Preparation_Kit_single-end	uchime_4.2	TRUE	49.1	F1-T	15-B	TCACGATAAAGGGCACCACAAGAACGC	AGATGATGCCACCTATCACACAATCATG	FWD:_{AAGGGCACCACAAGAACGC}_REV:_{CCACCTATCACACAATCATG}	F1-T_15-B	TCACGATAAAGGGCACCACAAGAACGC_AGATGATGCCACCTATCACACAATCATG	DSMP_37F_DNA_B_1_3	1877212	TruSeq	normalized	2017-07-04	TruSeq10	Illumina	HiSeq_2500	none	lane_pool37F	40	535.96	4	41	initial_denaturation:95_5;_denaturation:_94_0.5;_annealing:52_0.2;_elongation:_72_1;_40_cycles;_final_elongation:72_2	2.6	15.38	39.99
37F.DNA.224.A	CCGGGGGC	CCGGGGGC	18S_rRNA	37F	37F	DNA	224	A	No	MIMARKS-survey	DSMP	gene|marine_metagenome|uncultured_microorganism|uncultured_organism|ecotype|biological_replicate|technical_replicate|interspecies_interaction_between_organisms	0	marine_abyssal_zone_biome	marine_oligotrophic_desert	mud	sediment	aerobe	https://www.qiagen.com/us/cmp/ecom/powersoilkits?COECM_MOBIO_Branded_1707_SEA_PowerSoil__&kwid=%2Bpower%20%2Bsoil%20%2Brna	https://github.com/FranckLejzerowicz/protocols	TruSeq_Nano_PCR_free_Library_Preparation_Kit_single-end	uchime_4.2	TRUE	63	F1-T	15-E	TCACGATAAAGGGCACCACAAGAACGC	ATAGACTGCCACCTATCACACAATCATG	FWD:_{AAGGGCACCACAAGAACGC}_REV:_{CCACCTATCACACAATCATG}	F1-T_15-E	TCACGATAAAGGGCACCACAAGAACGC_ATAGACTGCCACCTATCACACAATCATG	DSMP_37F_DNA_A_1_1	15294031	TruSeq	normalized	2017-07-04	TruSeq1	Illumina	HiSeq_2500	none	lane_pool37F	30	22.46	4	42	initial_denaturation:95_5;_denaturation:_94_0.5;_annealing:52_0.2;_elongation:_72_1;_40_cycles;_final_elongation:72_2	1.2	25	30
37F.DNA.224.B	CCGGGGGG	CCGGGGGG	18S_rRNA	37F	37F	DNA	224	B	No	MIMARKS-survey	DSMP	gene|marine_metagenome|uncultured_microorganism|uncultured_organism|ecotype|biological_replicate|technical_replicate|interspecies_interaction_between_organisms	0	marine_abyssal_zone_biome	marine_oligotrophic_desert	mud	sediment	aerobe	https://www.qiagen.com/us/cmp/ecom/powersoilkits?COECM_MOBIO_Branded_1707_SEA_PowerSoil__&kwid=%2Bpower%20%2Bsoil%20%2Brna	https://github.com/FranckLejzerowicz/protocols	TruSeq_Nano_PCR_free_Library_Preparation_Kit_single-end	uchime_4.2	TRUE	63	F1-T	15-E	TCACGATAAAGGGCACCACAAGAACGC	ATAGACTGCCACCTATCACACAATCATG	FWD:_{AAGGGCACCACAAGAACGC}_REV:_{CCACCTATCACACAATCATG}	F1-T_15-E	TCACGATAAAGGGCACCACAAGAACGC_ATAGACTGCCACCTATCACACAATCATG	DSMP_37F_DNA_B_1_1	2278945	TruSeq	normalized	2017-07-04	TruSeq8	Illumina	HiSeq_2500	none	lane_pool37F	40	337.28	4	42	initial_denaturation:95_5;_denaturation:_94_0.5;_annealing:52_0.2;_elongation:_72_1;_40_cycles;_final_elongation:72_2	2.2	18.18	40
37F.DNA.225.A	CCGGGGGT	CCGGGGGT	18S_rRNA	37F	37F	DNA	225	A	No	MIMARKS-survey	DSMP	gene|marine_metagenome|uncultured_microorganism|uncultured_organism|ecotype|biological_replicate|technical_replicate|interspecies_interaction_between_organisms	0	marine_abyssal_zone_biome	marine_oligotrophic_desert	mud	sediment	aerobe	https://www.qiagen.com/us/cmp/ecom/powersoilkits?COECM_MOBIO_Branded_1707_SEA_PowerSoil__&kwid=%2Bpower%20%2Bsoil%20%2Brna	https://github.com/FranckLejzerowicz/protocols	TruSeq_Nano_PCR_free_Library_Preparation_Kit_single-end	uchime_4.2	TRUE	49.4	F1-T	15-F	TCACGATAAAGGGCACCACAAGAACGC	ATATCTACCCACCTATCACACAATCATG	FWD:_{AAGGGCACCACAAGAACGC}_REV:_{CCACCTATCACACAATCATG}	F1-T_15-F	TCACGATAAAGGGCACCACAAGAACGC_ATATCTACCCACCTATCACACAATCATG	DSMP_37F_DNA_A_1_2	15316119	TruSeq	normalized	2017-07-04	TruSeq4	Illumina	HiSeq_2500	none	lane_pool37F	27	20.04	4	42	initial_denaturation:95_5;_denaturation:_94_0.5;_annealing:52_0.2;_elongation:_72_1;_40_cycles;_final_elongation:72_2	0.96	50	48
37F.DNA.225.B	CCGGGGTC	CCGGGGTC	18S_rRNA	37F	37F	DNA	225	B	No	MIMARKS-survey	DSMP	gene|marine_metagenome|uncultured_microorganism|uncultured_organism|ecotype|biological_replicate|technical_replicate|interspecies_interaction_between_organisms	0	marine_abyssal_zone_biome	marine_oligotrophic_desert	mud	sediment	aerobe	https://www.qiagen.com/us/cmp/ecom/powersoilkits?COECM_MOBIO_Branded_1707_SEA_PowerSoil__&kwid=%2Bpower%20%2Bsoil%20%2Brna	https://github.com/FranckLejzerowicz/protocols	TruSeq_Nano_PCR_free_Library_Preparation_Kit_single-end	uchime_4.2	TRUE	49.4	F1-T	15-F	TCACGATAAAGGGCACCACAAGAACGC	ATATCTACCCACCTATCACACAATCATG	FWD:_{AAGGGCACCACAAGAACGC}_REV:_{CCACCTATCACACAATCATG}	F1-T_15-F	TCACGATAAAGGGCACCACAAGAACGC_ATATCTACCCACCTATCACACAATCATG	DSMP_37F_DNA_B_1_1	2278945	TruSeq	normalized	2017-07-04	TruSeq8	Illumina	HiSeq_2500	none	lane_pool37F	40	337.28	4	42	initial_denaturation:95_5;_denaturation:_94_0.5;_annealing:52_0.2;_elongation:_72_1;_40_cycles;_final_elongation:72_2	1.12	50	56
37F.DNA.226.A	CCGGGGTG	CCGGGGTG	18S_rRNA	37F	37F	DNA	226	A	No	MIMARKS-survey	DSMP	gene|marine_metagenome|uncultured_microorganism|uncultured_organism|ecotype|biological_replicate|technical_replicate|interspecies_interaction_between_organisms	0	marine_abyssal_zone_biome	marine_oligotrophic_desert	mud	sediment	aerobe	https://www.qiagen.com/us/cmp/ecom/powersoilkits?COECM_MOBIO_Branded_1707_SEA_PowerSoil__&kwid=%2Bpower%20%2Bsoil%20%2Brna	https://github.com/FranckLejzerowicz/protocols	TruSeq_Nano_PCR_free_Library_Preparation_Kit_single-end	uchime_4.2	TRUE	49	F1-T	15-O	TCACGATAAAGGGCACCACAAGAACGC	CGAGCTAGCCACCTATCACACAATCATG	FWD:_{AAGGGCACCACAAGAACGC}_REV:_{CCACCTATCACACAATCATG}	F1-T_15-O	TCACGATAAAGGGCACCACAAGAACGC_CGAGCTAGCCACCTATCACACAATCATG	DSMP_37F_DNA_A_1_2	15316119	TruSeq	normalized	2017-07-04	TruSeq4	Illumina	HiSeq_2500	none	lane_pool37F	27	20.04	4	42	initial_denaturation:95_5;_denaturation:_94_0.5;_annealing:52_0.2;_elongation:_72_1;_40_cycles;_final_elongation:72_2	1.2	22.5	27
37F.DNA.226.B	CCGGGGTT	CCGGGGTT	18S_rRNA	37F	37F	DNA	226	B	No	MIMARKS-survey	DSMP	gene|marine_metagenome|uncultured_microorganism|uncultured_organism|ecotype|biological_replicate|technical_replicate|interspecies_interaction_between_organisms	0	marine_abyssal_zone_biome	marine_oligotrophic_desert	mud	sediment	aerobe	https://www.qiagen.com/us/cmp/ecom/powersoilkits?COECM_MOBIO_Branded_1707_SEA_PowerSoil__&kwid=%2Bpower%20%2Bsoil%20%2Brna	https://github.com/FranckLejzerowicz/protocols	TruSeq_Nano_PCR_free_Library_Preparation_Kit_single-end	uchime_4.2	TRUE	49	F1-T	15-O	TCACGATAAAGGGCACCACAAGAACGC	CGAGCTAGCCACCTATCACACAATCATG	FWD:_{AAGGGCACCACAAGAACGC}_REV:_{CCACCTATCACACAATCATG}	F1-T_15-O	TCACGATAAAGGGCACCACAAGAACGC_CGAGCTAGCCACCTATCACACAATCATG	DSMP_37F_DNA_B_1_2	2198874	TruSeq	normalized	2017-07-04	TruSeq9	Illumina	HiSeq_2500	none	lane_pool37F	40	307.78	4	42	initial_denaturation:95_5;_denaturation:_94_0.5;_annealing:52_0.2;_elongation:_72_1;_40_cycles;_final_elongation:72_2	1.2	50	60
37F.DNA.227.A	CCGGGTCC	CCGGGTCC	18S_rRNA	37F	37F	DNA	227	A	No	MIMARKS-survey	DSMP	gene|marine_metagenome|uncultured_microorganism|uncultured_organism|ecotype|biological_replicate|technical_replicate|interspecies_interaction_between_organisms	0	marine_abyssal_zone_biome	marine_oligotrophic_desert	mud	sediment	aerobe	https://www.qiagen.com/us/cmp/ecom/powersoilkits?COECM_MOBIO_Branded_1707_SEA_PowerSoil__&kwid=%2Bpower%20%2Bsoil%20%2Brna	https://github.com/FranckLejzerowicz/protocols	TruSeq_Nano_PCR_free_Library_Preparation_Kit_single-end	uchime_4.2	TRUE	50	F1-T	15-V	TCACGATAAAGGGCACCACAAGAACGC	TATGACATCCACCTATCACACAATCATG	FWD:_{AAGGGCACCACAAGAACGC}_REV:_{CCACCTATCACACAATCATG}	F1-T_15-V	TCACGATAAAGGGCACCACAAGAACGC_TATGACATCCACCTATCACACAATCATG	DSMP_37F_DNA_A_1_3	18703377	TruSeq	normalized	2017-07-04	TruSeq5	Illumina	HiSeq_2500	none	lane_pool37F	27.5	17.75	4	41	initial_denaturation:95_5;_denaturation:_94_0.5;_annealing:52_0.2;_elongation:_72_1;_40_cycles;_final_elongation:72_2	1.3	21.15	27.49
37F.DNA.227.B	CCGGGTCG	CCGGGTCG	18S_rRNA	37F	37F	DNA	227	B	No	MIMARKS-survey	DSMP	gene|marine_metagenome|uncultured_microorganism|uncultured_organism|ecotype|biological_replicate|technical_replicate|interspecies_interaction_between_organisms	0	marine_abyssal_zone_biome	marine_oligotrophic_desert	mud	sediment	aerobe	https://www.qiagen.com/us/cmp/ecom/powersoilkits?COECM_MOBIO_Branded_1707_SEA_PowerSoil__&kwid=%2Bpower%20%2Bsoil%20%2Brna	https://github.com/FranckLejzerowicz/protocols	TruSeq_Nano_PCR_free_Library_Preparation_Kit_single-end	uchime_4.2	TRUE	50	F1-T	15-V	TCACGATAAAGGGCACCACAAGAACGC	TATGACATCCACCTATCACACAATCATG	FWD:_{AAGGGCACCACAAGAACGC}_REV:_{CCACCTATCACACAATCATG}	F1-T_15-V	TCACGATAAAGGGCACCACAAGAACGC_TATGACATCCACCTATCACACAATCATG	DSMP_37F_DNA_B_1_2	2198874	TruSeq	normalized	2017-07-04	TruSeq9	Illumina	HiSeq_2500	none	lane_pool37F	40	307.78	4	42	initial_denaturation:95_5;_denaturation:_94_0.5;_annealing:52_0.2;_elongation:_72_1;_40_cycles;_final_elongation:72_2	2.1	19.05	40.01
37F.DNA.228.A	CCGGGTCT	CCGGGTCT	18S_rRNA	37F	37F	DNA	228	A	No	MIMARKS-survey	DSMP	gene|marine_metagenome|uncultured_microorganism|uncultured_organism|ecotype|biological_replicate|technical_replicate|interspecies_interaction_between_organisms	0	marine_abyssal_zone_biome	marine_oligotrophic_desert	mud	sediment	aerobe	https://www.qiagen.com/us/cmp/ecom/powersoilkits?COECM_MOBIO_Branded_1707_SEA_PowerSoil__&kwid=%2Bpower%20%2Bsoil%20%2Brna	https://github.com/FranckLejzerowicz/protocols	TruSeq_Nano_PCR_free_Library_Preparation_Kit_single-end	uchime_4.2	TRUE	122.5	F1-T	15-X	TCACGATAAAGGGCACCACAAGAACGC	TGATGCATCCACCTATCACACAATCATG	FWD:_{AAGGGCACCACAAGAACGC}_REV:_{CCACCTATCACACAATCATG}	F1-T_15-X	TCACGATAAAGGGCACCACAAGAACGC_TGATGCATCCACCTATCACACAATCATG	DSMP_37F_DNA_A_1_1	15294031	TruSeq	normalized	2017-07-04	TruSeq1	Illumina	HiSeq_2500	none	lane_pool37F	30	22.46	4	42	initial_denaturation:95_5;_denaturation:_94_0.5;_annealing:52_0.2;_elongation:_72_1;_40_cycles;_final_elongation:72_2	3.3	9.09	30
37F.DNA.228.B	CCGGGTGC	CCGGGTGC	18S_rRNA	37F	37F	DNA	228	B	No	MIMARKS-survey	DSMP	gene|marine_metagenome|uncultured_microorganism|uncultured_organism|ecotype|biological_replicate|technical_replicate|interspecies_interaction_between_organisms	0	marine_abyssal_zone_biome	marine_oligotrophic_desert	mud	sediment	aerobe	https://www.qiagen.com/us/cmp/ecom/powersoilkits?COECM_MOBIO_Branded_1707_SEA_PowerSoil__&kwid=%2Bpower%20%2Bsoil%20%2Brna	https://github.com/FranckLejzerowicz/protocols	TruSeq_Nano_PCR_free_Library_Preparation_Kit_single-end	uchime_4.2	TRUE	122.5	F1-T	15-X	TCACGATAAAGGGCACCACAAGAACGC	TGATGCATCCACCTATCACACAATCATG	FWD:_{AAGGGCACCACAAGAACGC}_REV:_{CCACCTATCACACAATCATG}	F1-T_15-X	TCACGATAAAGGGCACCACAAGAACGC_TGATGCATCCACCTATCACACAATCATG	DSMP_37F_DNA_B_1_2	2198874	TruSeq	normalized	2017-07-04	TruSeq9	Illumina	HiSeq_2500	none	lane_pool37F	40	307.78	4	42	initial_denaturation:95_5;_denaturation:_94_0.5;_annealing:52_0.2;_elongation:_72_1;_40_cycles;_final_elongation:72_2	4	10	40
37F.DNA.229.A	CCGGGTGG	CCGGGTGG	18S_rRNA	37F	37F	DNA	229	A	No	MIMARKS-survey	DSMP	gene|marine_metagenome|uncultured_microorganism|uncultured_organism|ecotype|biological_replicate|technical_replicate|interspecies_interaction_between_organisms	0	marine_abyssal_zone_biome	marine_oligotrophic_desert	mud	sediment	aerobe	https://www.qiagen.com/us/cmp/ecom/powersoilkits?COECM_MOBIO_Branded_1707_SEA_PowerSoil__&kwid=%2Bpower%20%2Bsoil%20%2Brna	https://github.com/FranckLejzerowicz/protocols	TruSeq_Nano_PCR_free_Library_Preparation_Kit_single-end	uchime_4.2	TRUE	51	F1-U	15-C	TCGTCTATAAGGGCACCACAAGAACGC	AGTCGCGTCCACCTATCACACAATCATG	FWD:_{AAGGGCACCACAAGAACGC}_REV:_{CCACCTATCACACAATCATG}	F1-U_15-C	TCGTCTATAAGGGCACCACAAGAACGC_AGTCGCGTCCACCTATCACACAATCATG	DSMP_37F_DNA_A_1_3	18703377	TruSeq	normalized	2017-07-04	TruSeq5	Illumina	HiSeq_2500	none	lane_pool37F	27.5	17.75	4	41	initial_denaturation:95_5;_denaturation:_94_0.5;_annealing:52_0.2;_elongation:_72_1;_40_cycles;_final_elongation:72_2	3.5	7.86	27.51
37F.DNA.229.B	CCGGGTGT	CCGGGTGT	18S_rRNA	37F	37F	DNA	229	B	No	MIMARKS-survey	DSMP	gene|marine_metagenome|uncultured_microorganism|uncultured_organism|ecotype|biological_replicate|technical_replicate|interspecies_interaction_between_organisms	0	marine_abyssal_zone_biome	marine_oligotrophic_desert	mud	sediment	aerobe	https://www.qiagen.com/us/cmp/ecom/powersoilkits?COECM_MOBIO_Branded_1707_SEA_PowerSoil__&kwid=%2Bpower%20%2Bsoil%20%2Brna	https://github.com/FranckLejzerowicz/protocols	TruSeq_Nano_PCR_free_Library_Preparation_Kit_single-end	uchime_4.2	TRUE	51	F1-U	15-C	TCGTCTATAAGGGCACCACAAGAACGC	AGTCGCGTCCACCTATCACACAATCATG	FWD:_{AAGGGCACCACAAGAACGC}_REV:_{CCACCTATCACACAATCATG}	F1-U_15-C	TCGTCTATAAGGGCACCACAAGAACGC_AGTCGCGTCCACCTATCACACAATCATG	DSMP_37F_DNA_B_1_2	2198874	TruSeq	normalized	2017-07-04	TruSeq9	Illumina	HiSeq_2500	none	lane_pool37F	40	307.78	4	42	initial_denaturation:95_5;_denaturation:_94_0.5;_annealing:52_0.2;_elongation:_72_1;_40_cycles;_final_elongation:72_2	3.2	12.5	40
37F.DNA.230.A	CCGGGTTC	CCGGGTTC	18S_rRNA	37F	37F	DNA	230	A	No	MIMARKS-survey	DSMP	gene|marine_metagenome|uncultured_microorganism|uncultured_organism|ecotype|biological_replicate|technical_replicate|interspecies_interaction_between_organisms	0	marine_abyssal_zone_biome	marine_oligotrophic_desert	mud	sediment	aerobe	https://www.qiagen.com/us/cmp/ecom/powersoilkits?COECM_MOBIO_Branded_1707_SEA_PowerSoil__&kwid=%2Bpower%20%2Bsoil%20%2Brna	https://github.com/FranckLejzerowicz/protocols	TruSeq_Nano_PCR_free_Library_Preparation_Kit_single-end	uchime_4.2	TRUE	59	F1-U	15-I	TCGTCTATAAGGGCACCACAAGAACGC	ATGTGCTCCCACCTATCACACAATCATG	FWD:_{AAGGGCACCACAAGAACGC}_REV:_{CCACCTATCACACAATCATG}	F1-U_15-I	TCGTCTATAAGGGCACCACAAGAACGC_ATGTGCTCCCACCTATCACACAATCATG	DSMP_37F_DNA_A_1_3	18703377	TruSeq	normalized	2017-07-04	TruSeq5	Illumina	HiSeq_2500	none	lane_pool37F	27.5	17.75	4	41	initial_denaturation:95_5;_denaturation:_94_0.5;_annealing:52_0.2;_elongation:_72_1;_40_cycles;_final_elongation:72_2	2.5	11	27.5
37F.DNA.230.B	CCGGGTTG	CCGGGTTG	18S_rRNA	37F	37F	DNA	230	B	No	MIMARKS-survey	DSMP	gene|marine_metagenome|uncultured_microorganism|uncultured_organism|ecotype|biological_replicate|technical_replicate|interspecies_interaction_between_organisms	0	marine_abyssal_zone_biome	marine_oligotrophic_desert	mud	sediment	aerobe	https://www.qiagen.com/us/cmp/ecom/powersoilkits?COECM_MOBIO_Branded_1707_SEA_PowerSoil__&kwid=%2Bpower%20%2Bsoil%20%2Brna	https://github.com/FranckLejzerowicz/protocols	TruSeq_Nano_PCR_free_Library_Preparation_Kit_single-end	uchime_4.2	TRUE	59	F1-U	15-I	TCGTCTATAAGGGCACCACAAGAACGC	ATGTGCTCCCACCTATCACACAATCATG	FWD:_{AAGGGCACCACAAGAACGC}_REV:_{CCACCTATCACACAATCATG}	F1-U_15-I	TCGTCTATAAGGGCACCACAAGAACGC_ATGTGCTCCCACCTATCACACAATCATG	DSMP_37F_DNA_B_1_2	2198874	TruSeq	normalized	2017-07-04	TruSeq9	Illumina	HiSeq_2500	none	lane_pool37F	40	307.78	4	42	initial_denaturation:95_5;_denaturation:_94_0.5;_annealing:52_0.2;_elongation:_72_1;_40_cycles;_final_elongation:72_2	2.4	16.67	40.01
37F.DNA.231.A	CCGGGTTT	CCGGGTTT	18S_rRNA	37F	37F	DNA	231	A	No	MIMARKS-survey	DSMP	gene|marine_metagenome|uncultured_microorganism|uncultured_organism|ecotype|biological_replicate|technical_replicate|interspecies_interaction_between_organisms	0	marine_abyssal_zone_biome	marine_oligotrophic_desert	mud	sediment	aerobe	https://www.qiagen.com/us/cmp/ecom/powersoilkits?COECM_MOBIO_Branded_1707_SEA_PowerSoil__&kwid=%2Bpower%20%2Bsoil%20%2Brna	https://github.com/FranckLejzerowicz/protocols	TruSeq_Nano_PCR_free_Library_Preparation_Kit_single-end	uchime_4.2	TRUE	52	F1-U	15-P	TCGTCTATAAGGGCACCACAAGAACGC	CTAGCATCCCACCTATCACACAATCATG	FWD:_{AAGGGCACCACAAGAACGC}_REV:_{CCACCTATCACACAATCATG}	F1-U_15-P	TCGTCTATAAGGGCACCACAAGAACGC_CTAGCATCCCACCTATCACACAATCATG	DSMP_37F_DNA_A_1_2	15316119	TruSeq	normalized	2017-07-04	TruSeq4	Illumina	HiSeq_2500	none	lane_pool37F	27	20.04	4	42	initial_denaturation:95_5;_denaturation:_94_0.5;_annealing:52_0.2;_elongation:_72_1;_40_cycles;_final_elongation:72_2	2.3	11.74	27
37F.DNA.231.B	CCGGTCCC	CCGGTCCC	18S_rRNA	37F	37F	DNA	231	B	No	MIMARKS-survey	DSMP	gene|marine_metagenome|uncultured_microorganism|uncultured_organism|ecotype|biological_replicate|technical_replicate|interspecies_interaction_between_organisms	0	marine_abyssal_zone_biome	marine_oligotrophic_desert	mud	sediment	aerobe	https://www.qiagen.com/us/cmp/ecom/powersoilkits?COECM_MOBIO_Branded_1707_SEA_PowerSoil__&kwid=%2Bpower%20%2Bsoil%20%2Brna	https://github.com/FranckLejzerowicz/protocols	TruSeq_Nano_PCR_free_Library_Preparation_Kit_single-end	uchime_4.2	TRUE	52	F1-U	15-P	TCGTCTATAAGGGCACCACAAGAACGC	CTAGCATCCCACCTATCACACAATCATG	FWD:_{AAGGGCACCACAAGAACGC}_REV:_{CCACCTATCACACAATCATG}	F1-U_15-P	TCGTCTATAAGGGCACCACAAGAACGC_CTAGCATCCCACCTATCACACAATCATG	DSMP_37F_DNA_B_1_3	1877212	TruSeq	normalized	2017-07-04	TruSeq10	Illumina	HiSeq_2500	none	lane_pool37F	40	535.96	4	41	initial_denaturation:95_5;_denaturation:_94_0.5;_annealing:52_0.2;_elongation:_72_1;_40_cycles;_final_elongation:72_2	2.5	16	40
37F.DNA.232.A	CCGGTCCG	CCGGTCCG	18S_rRNA	37F	37F	DNA	232	A	No	MIMARKS-survey	DSMP	gene|marine_metagenome|uncultured_microorganism|uncultured_organism|ecotype|biological_replicate|technical_replicate|interspecies_interaction_between_organisms	0	marine_abyssal_zone_biome	marine_oligotrophic_desert	mud	sediment	aerobe	https://www.qiagen.com/us/cmp/ecom/powersoilkits?COECM_MOBIO_Branded_1707_SEA_PowerSoil__&kwid=%2Bpower%20%2Bsoil%20%2Brna	https://github.com/FranckLejzerowicz/protocols	TruSeq_Nano_PCR_free_Library_Preparation_Kit_single-end	uchime_4.2	TRUE	102	F1-U	15-R	TCGTCTATAAGGGCACCACAAGAACGC	CTGTATATCCACCTATCACACAATCATG	FWD:_{AAGGGCACCACAAGAACGC}_REV:_{CCACCTATCACACAATCATG}	F1-U_15-R	TCGTCTATAAGGGCACCACAAGAACGC_CTGTATATCCACCTATCACACAATCATG	DSMP_37F_DNA_A_1_1	15294031	TruSeq	normalized	2017-07-04	TruSeq1	Illumina	HiSeq_2500	none	lane_pool37F	30	22.46	4	42	initial_denaturation:95_5;_denaturation:_94_0.5;_annealing:52_0.2;_elongation:_72_1;_40_cycles;_final_elongation:72_2	0.6	50	30
37F.DNA.232.B	CCGGTCCT	CCGGTCCT	18S_rRNA	37F	37F	DNA	232	B	No	MIMARKS-survey	DSMP	gene|marine_metagenome|uncultured_microorganism|uncultured_organism|ecotype|biological_replicate|technical_replicate|interspecies_interaction_between_organisms	0	marine_abyssal_zone_biome	marine_oligotrophic_desert	mud	sediment	aerobe	https://www.qiagen.com/us/cmp/ecom/powersoilkits?COECM_MOBIO_Branded_1707_SEA_PowerSoil__&kwid=%2Bpower%20%2Bsoil%20%2Brna	https://github.com/FranckLejzerowicz/protocols	TruSeq_Nano_PCR_free_Library_Preparation_Kit_single-end	uchime_4.2	TRUE	102	F1-U	15-R	TCGTCTATAAGGGCACCACAAGAACGC	CTGTATATCCACCTATCACACAATCATG	FWD:_{AAGGGCACCACAAGAACGC}_REV:_{CCACCTATCACACAATCATG}	F1-U_15-R	TCGTCTATAAGGGCACCACAAGAACGC_CTGTATATCCACCTATCACACAATCATG	DSMP_37F_DNA_B_1_2	2198874	TruSeq	normalized	2017-07-04	TruSeq9	Illumina	HiSeq_2500	none	lane_pool37F	40	307.78	4	42	initial_denaturation:95_5;_denaturation:_94_0.5;_annealing:52_0.2;_elongation:_72_1;_40_cycles;_final_elongation:72_2	1.3	50	65
37F.DNA.233.A	CCGGTCGC	CCGGTCGC	18S_rRNA	37F	37F	DNA	233	A	No	MIMARKS-survey	DSMP	gene|marine_metagenome|uncultured_microorganism|uncultured_organism|ecotype|biological_replicate|technical_replicate|interspecies_interaction_between_organisms	0	marine_abyssal_zone_biome	marine_oligotrophic_desert	mud	sediment	aerobe	https://www.qiagen.com/us/cmp/ecom/powersoilkits?COECM_MOBIO_Branded_1707_SEA_PowerSoil__&kwid=%2Bpower%20%2Bsoil%20%2Brna	https://github.com/FranckLejzerowicz/protocols	TruSeq_Nano_PCR_free_Library_Preparation_Kit_single-end	uchime_4.2	TRUE	11.4	F1-U	15-S	TCGTCTATAAGGGCACCACAAGAACGC	TAGCATGTCCACCTATCACACAATCATG	FWD:_{AAGGGCACCACAAGAACGC}_REV:_{CCACCTATCACACAATCATG}	F1-U_15-S	TCGTCTATAAGGGCACCACAAGAACGC_TAGCATGTCCACCTATCACACAATCATG	DSMP_37F_DNA_A_1_2	15316119	TruSeq	normalized	2017-07-04	TruSeq4	Illumina	HiSeq_2500	none	lane_pool37F	27	20.04	4	42	initial_denaturation:95_5;_denaturation:_94_0.5;_annealing:52_0.2;_elongation:_72_1;_40_cycles;_final_elongation:72_2	1	27	27
37F.DNA.233.B	CCGGTCGG	CCGGTCGG	18S_rRNA	37F	37F	DNA	233	B	No	MIMARKS-survey	DSMP	gene|marine_metagenome|uncultured_microorganism|uncultured_organism|ecotype|biological_replicate|technical_replicate|interspecies_interaction_between_organisms	0	marine_abyssal_zone_biome	marine_oligotrophic_desert	mud	sediment	aerobe	https://www.qiagen.com/us/cmp/ecom/powersoilkits?COECM_MOBIO_Branded_1707_SEA_PowerSoil__&kwid=%2Bpower%20%2Bsoil%20%2Brna	https://github.com/FranckLejzerowicz/protocols	TruSeq_Nano_PCR_free_Library_Preparation_Kit_single-end	uchime_4.2	TRUE	11.4	F1-U	15-S	TCGTCTATAAGGGCACCACAAGAACGC	TAGCATGTCCACCTATCACACAATCATG	FWD:_{AAGGGCACCACAAGAACGC}_REV:_{CCACCTATCACACAATCATG}	F1-U_15-S	TCGTCTATAAGGGCACCACAAGAACGC_TAGCATGTCCACCTATCACACAATCATG	DSMP_37F_DNA_B_1_3	1877212	TruSeq	normalized	2017-07-04	TruSeq10	Illumina	HiSeq_2500	none	lane_pool37F	40	535.96	4	41	initial_denaturation:95_5;_denaturation:_94_0.5;_annealing:52_0.2;_elongation:_72_1;_40_cycles;_final_elongation:72_2	2.3	17.39	40
37F.DNA.234.A	CCGGTCGT	CCGGTCGT	18S_rRNA	37F	37F	DNA	234	A	No	MIMARKS-survey	DSMP	gene|marine_metagenome|uncultured_microorganism|uncultured_organism|ecotype|biological_replicate|technical_replicate|interspecies_interaction_between_organisms	0	marine_abyssal_zone_biome	marine_oligotrophic_desert	mud	sediment	aerobe	https://www.qiagen.com/us/cmp/ecom/powersoilkits?COECM_MOBIO_Branded_1707_SEA_PowerSoil__&kwid=%2Bpower%20%2Bsoil%20%2Brna	https://github.com/FranckLejzerowicz/protocols	TruSeq_Nano_PCR_free_Library_Preparation_Kit_single-end	uchime_4.2	TRUE	7.83	F1-U	15-Z	TCGTCTATAAGGGCACCACAAGAACGC	TGTGCATGCCACCTATCACACAATCATG	FWD:_{AAGGGCACCACAAGAACGC}_REV:_{CCACCTATCACACAATCATG}	F1-U_15-Z	TCGTCTATAAGGGCACCACAAGAACGC_TGTGCATGCCACCTATCACACAATCATG	DSMP_37F_DNA_A_1_2	15316119	TruSeq	normalized	2017-07-04	TruSeq4	Illumina	HiSeq_2500	none	lane_pool37F	27	20.04	4	42	initial_denaturation:95_5;_denaturation:_94_0.5;_annealing:52_0.2;_elongation:_72_1;_40_cycles;_final_elongation:72_2	1	27	27
37F.DNA.234.B	CCGGTCTC	CCGGTCTC	18S_rRNA	37F	37F	DNA	234	B	No	MIMARKS-survey	DSMP	gene|marine_metagenome|uncultured_microorganism|uncultured_organism|ecotype|biological_replicate|technical_replicate|interspecies_interaction_between_organisms	0	marine_abyssal_zone_biome	marine_oligotrophic_desert	mud	sediment	aerobe	https://www.qiagen.com/us/cmp/ecom/powersoilkits?COECM_MOBIO_Branded_1707_SEA_PowerSoil__&kwid=%2Bpower%20%2Bsoil%20%2Brna	https://github.com/FranckLejzerowicz/protocols	TruSeq_Nano_PCR_free_Library_Preparation_Kit_single-end	uchime_4.2	TRUE	7.83	F1-U	15-Z	TCGTCTATAAGGGCACCACAAGAACGC	TGTGCATGCCACCTATCACACAATCATG	FWD:_{AAGGGCACCACAAGAACGC}_REV:_{CCACCTATCACACAATCATG}	F1-U_15-Z	TCGTCTATAAGGGCACCACAAGAACGC_TGTGCATGCCACCTATCACACAATCATG	DSMP_37F_DNA_B_1_1	2278945	TruSeq	normalized	2017-07-04	TruSeq8	Illumina	HiSeq_2500	none	lane_pool37F	40	337.28	4	42	initial_denaturation:95_5;_denaturation:_94_0.5;_annealing:52_0.2;_elongation:_72_1;_40_cycles;_final_elongation:72_2	2.9	13.79	39.99
37F.DNA.235.A	CCGGTCTG	CCGGTCTG	18S_rRNA	37F	37F	DNA	235	A	No	MIMARKS-survey	DSMP	gene|marine_metagenome|uncultured_microorganism|uncultured_organism|ecotype|biological_replicate|technical_replicate|interspecies_interaction_between_organisms	0	marine_abyssal_zone_biome	marine_oligotrophic_desert	mud	sediment	aerobe	https://www.qiagen.com/us/cmp/ecom/powersoilkits?COECM_MOBIO_Branded_1707_SEA_PowerSoil__&kwid=%2Bpower%20%2Bsoil%20%2Brna	https://github.com/FranckLejzerowicz/protocols	TruSeq_Nano_PCR_free_Library_Preparation_Kit_single-end	uchime_4.2	TRUE	16.7	F1-V	15-J	TGACGTCTAAGGGCACCACAAGAACGC	CAGTGCAGCCACCTATCACACAATCATG	FWD:_{AAGGGCACCACAAGAACGC}_REV:_{CCACCTATCACACAATCATG}	F1-V_15-J	TGACGTCTAAGGGCACCACAAGAACGC_CAGTGCAGCCACCTATCACACAATCATG	DSMP_37F_DNA_A_1_3	18703377	TruSeq	normalized	2017-07-04	TruSeq5	Illumina	HiSeq_2500	none	lane_pool37F	27.5	17.75	4	41	initial_denaturation:95_5;_denaturation:_94_0.5;_annealing:52_0.2;_elongation:_72_1;_40_cycles;_final_elongation:72_2	2.9	9.48	27.49
37F.DNA.235.B	CCGGTCTT	CCGGTCTT	18S_rRNA	37F	37F	DNA	235	B	No	MIMARKS-survey	DSMP	gene|marine_metagenome|uncultured_microorganism|uncultured_organism|ecotype|biological_replicate|technical_replicate|interspecies_interaction_between_organisms	0	marine_abyssal_zone_biome	marine_oligotrophic_desert	mud	sediment	aerobe	https://www.qiagen.com/us/cmp/ecom/powersoilkits?COECM_MOBIO_Branded_1707_SEA_PowerSoil__&kwid=%2Bpower%20%2Bsoil%20%2Brna	https://github.com/FranckLejzerowicz/protocols	TruSeq_Nano_PCR_free_Library_Preparation_Kit_single-end	uchime_4.2	TRUE	16.7	F1-V	15-J	TGACGTCTAAGGGCACCACAAGAACGC	CAGTGCAGCCACCTATCACACAATCATG	FWD:_{AAGGGCACCACAAGAACGC}_REV:_{CCACCTATCACACAATCATG}	F1-V_15-J	TGACGTCTAAGGGCACCACAAGAACGC_CAGTGCAGCCACCTATCACACAATCATG	DSMP_37F_DNA_B_1_3	1877212	TruSeq	normalized	2017-07-04	TruSeq10	Illumina	HiSeq_2500	none	lane_pool37F	40	535.96	4	41	initial_denaturation:95_5;_denaturation:_94_0.5;_annealing:52_0.2;_elongation:_72_1;_40_cycles;_final_elongation:72_2	4.2	9.52	39.98
37F.DNA.236.A	CCGGTGCC	CCGGTGCC	18S_rRNA	37F	37F	DNA	236	A	No	MIMARKS-survey	DSMP	gene|marine_metagenome|uncultured_microorganism|uncultured_organism|ecotype|biological_replicate|technical_replicate|interspecies_interaction_between_organisms	0	marine_abyssal_zone_biome	marine_oligotrophic_desert	mud	sediment	aerobe	https://www.qiagen.com/us/cmp/ecom/powersoilkits?COECM_MOBIO_Branded_1707_SEA_PowerSoil__&kwid=%2Bpower%20%2Bsoil%20%2Brna	https://github.com/FranckLejzerowicz/protocols	TruSeq_Nano_PCR_free_Library_Preparation_Kit_single-end	uchime_4.2	TRUE	18.9	F1-V	15-L	TGACGTCTAAGGGCACCACAAGAACGC	CATGCAGTCCACCTATCACACAATCATG	FWD:_{AAGGGCACCACAAGAACGC}_REV:_{CCACCTATCACACAATCATG}	F1-V_15-L	TGACGTCTAAGGGCACCACAAGAACGC_CATGCAGTCCACCTATCACACAATCATG	DSMP_37F_DNA_A_1_2	15316119	TruSeq	normalized	2017-07-04	TruSeq4	Illumina	HiSeq_2500	none	lane_pool37F	27	20.04	4	42	initial_denaturation:95_5;_denaturation:_94_0.5;_annealing:52_0.2;_elongation:_72_1;_40_cycles;_final_elongation:72_2	1.6	16.88	27.01
37F.DNA.236.B	CCGGTGCG	CCGGTGCG	18S_rRNA	37F	37F	DNA	236	B	No	MIMARKS-survey	DSMP	gene|marine_metagenome|uncultured_microorganism|uncultured_organism|ecotype|biological_replicate|technical_replicate|interspecies_interaction_between_organisms	0	marine_abyssal_zone_biome	marine_oligotrophic_desert	mud	sediment	aerobe	https://www.qiagen.com/us/cmp/ecom/powersoilkits?COECM_MOBIO_Branded_1707_SEA_PowerSoil__&kwid=%2Bpower%20%2Bsoil%20%2Brna	https://github.com/FranckLejzerowicz/protocols	TruSeq_Nano_PCR_free_Library_Preparation_Kit_single-end	uchime_4.2	TRUE	18.9	F1-V	15-L	TGACGTCTAAGGGCACCACAAGAACGC	CATGCAGTCCACCTATCACACAATCATG	FWD:_{AAGGGCACCACAAGAACGC}_REV:_{CCACCTATCACACAATCATG}	F1-V_15-L	TGACGTCTAAGGGCACCACAAGAACGC_CATGCAGTCCACCTATCACACAATCATG	DSMP_37F_DNA_B_1_3	1877212	TruSeq	normalized	2017-07-04	TruSeq10	Illumina	HiSeq_2500	none	lane_pool37F	40	535.96	4	41	initial_denaturation:95_5;_denaturation:_94_0.5;_annealing:52_0.2;_elongation:_72_1;_40_cycles;_final_elongation:72_2	1.3	50	65
37F.DNA.237.A	CCGGTGCT	CCGGTGCT	18S_rRNA	37F	37F	DNA	237	A	No	MIMARKS-survey	DSMP	gene|marine_metagenome|uncultured_microorganism|uncultured_organism|ecotype|biological_replicate|technical_replicate|interspecies_interaction_between_organisms	0	marine_abyssal_zone_biome	marine_oligotrophic_desert	mud	sediment	aerobe	https://www.qiagen.com/us/cmp/ecom/powersoilkits?COECM_MOBIO_Branded_1707_SEA_PowerSoil__&kwid=%2Bpower%20%2Bsoil%20%2Brna	https://github.com/FranckLejzerowicz/protocols	TruSeq_Nano_PCR_free_Library_Preparation_Kit_single-end	uchime_4.2	TRUE	4.12	F1-V	15-T	TGACGTCTAAGGGCACCACAAGAACGC	TAGTGAGCCCACCTATCACACAATCATG	FWD:_{AAGGGCACCACAAGAACGC}_REV:_{CCACCTATCACACAATCATG}	F1-V_15-T	TGACGTCTAAGGGCACCACAAGAACGC_TAGTGAGCCCACCTATCACACAATCATG	DSMP_37F_DNA_A_1_3	18703377	TruSeq	normalized	2017-07-04	TruSeq5	Illumina	HiSeq_2500	none	lane_pool37F	27.5	17.75	4	41	initial_denaturation:95_5;_denaturation:_94_0.5;_annealing:52_0.2;_elongation:_72_1;_40_cycles;_final_elongation:72_2	2.8	9.82	27.5
37F.DNA.237.B	CCGGTGGC	CCGGTGGC	18S_rRNA	37F	37F	DNA	237	B	No	MIMARKS-survey	DSMP	gene|marine_metagenome|uncultured_microorganism|uncultured_organism|ecotype|biological_replicate|technical_replicate|interspecies_interaction_between_organisms	0	marine_abyssal_zone_biome	marine_oligotrophic_desert	mud	sediment	aerobe	https://www.qiagen.com/us/cmp/ecom/powersoilkits?COECM_MOBIO_Branded_1707_SEA_PowerSoil__&kwid=%2Bpower%20%2Bsoil%20%2Brna	https://github.com/FranckLejzerowicz/protocols	TruSeq_Nano_PCR_free_Library_Preparation_Kit_single-end	uchime_4.2	TRUE	4.12	F1-V	15-T	TGACGTCTAAGGGCACCACAAGAACGC	TAGTGAGCCCACCTATCACACAATCATG	FWD:_{AAGGGCACCACAAGAACGC}_REV:_{CCACCTATCACACAATCATG}	F1-V_15-T	TGACGTCTAAGGGCACCACAAGAACGC_TAGTGAGCCCACCTATCACACAATCATG	DSMP_37F_DNA_B_1_3	1877212	TruSeq	normalized	2017-07-04	TruSeq10	Illumina	HiSeq_2500	none	lane_pool37F	40	535.96	4	41	initial_denaturation:95_5;_denaturation:_94_0.5;_annealing:52_0.2;_elongation:_72_1;_40_cycles;_final_elongation:72_2	3	13.33	39.99
37F.DNA.238.A	CCGGTGGG	CCGGTGGG	18S_rRNA	37F	37F	DNA	238	A	No	MIMARKS-survey	DSMP	gene|marine_metagenome|uncultured_microorganism|uncultured_organism|ecotype|biological_replicate|technical_replicate|interspecies_interaction_between_organisms	0	marine_abyssal_zone_biome	marine_oligotrophic_desert	mud	sediment	aerobe	https://www.qiagen.com/us/cmp/ecom/powersoilkits?COECM_MOBIO_Branded_1707_SEA_PowerSoil__&kwid=%2Bpower%20%2Bsoil%20%2Brna	https://github.com/FranckLejzerowicz/protocols	TruSeq_Nano_PCR_free_Library_Preparation_Kit_single-end	uchime_4.2	TRUE	7.77	F1-V	15-Y	TGACGTCTAAGGGCACCACAAGAACGC	TGTCATAGCCACCTATCACACAATCATG	FWD:_{AAGGGCACCACAAGAACGC}_REV:_{CCACCTATCACACAATCATG}	F1-V_15-Y	TGACGTCTAAGGGCACCACAAGAACGC_TGTCATAGCCACCTATCACACAATCATG	DSMP_37F_DNA_A_1_1	15294031	TruSeq	normalized	2017-07-04	TruSeq1	Illumina	HiSeq_2500	none	lane_pool37F	30	22.46	4	42	initial_denaturation:95_5;_denaturation:_94_0.5;_annealing:52_0.2;_elongation:_72_1;_40_cycles;_final_elongation:72_2	0.9	50	45
37F.DNA.238.B	CCGGTGGT	CCGGTGGT	18S_rRNA	37F	37F	DNA	238	B	No	MIMARKS-survey	DSMP	gene|marine_metagenome|uncultured_microorganism|uncultured_organism|ecotype|biological_replicate|technical_replicate|interspecies_interaction_between_organisms	0	marine_abyssal_zone_biome	marine_oligotrophic_desert	mud	sediment	aerobe	https://www.qiagen.com/us/cmp/ecom/powersoilkits?COECM_MOBIO_Branded_1707_SEA_PowerSoil__&kwid=%2Bpower%20%2Bsoil%20%2Brna	https://github.com/FranckLejzerowicz/protocols	TruSeq_Nano_PCR_free_Library_Preparation_Kit_single-end	uchime_4.2	TRUE	7.77	F1-V	15-Y	TGACGTCTAAGGGCACCACAAGAACGC	TGTCATAGCCACCTATCACACAATCATG	FWD:_{AAGGGCACCACAAGAACGC}_REV:_{CCACCTATCACACAATCATG}	F1-V_15-Y	TGACGTCTAAGGGCACCACAAGAACGC_TGTCATAGCCACCTATCACACAATCATG	DSMP_37F_DNA_B_1_1	2278945	TruSeq	normalized	2017-07-04	TruSeq8	Illumina	HiSeq_2500	none	lane_pool37F	40	337.28	4	42	initial_denaturation:95_5;_denaturation:_94_0.5;_annealing:52_0.2;_elongation:_72_1;_40_cycles;_final_elongation:72_2	0.92	50	46
37F.DNA.239.A	CCGGTGTC	CCGGTGTC	18S_rRNA	37F	37F	DNA	239	A	No	MIMARKS-survey	DSMP	gene|marine_metagenome|uncultured_microorganism|uncultured_organism|ecotype|biological_replicate|technical_replicate|interspecies_interaction_between_organisms	0	marine_abyssal_zone_biome	marine_oligotrophic_desert	mud	sediment	aerobe	https://www.qiagen.com/us/cmp/ecom/powersoilkits?COECM_MOBIO_Branded_1707_SEA_PowerSoil__&kwid=%2Bpower%20%2Bsoil%20%2Brna	https://github.com/FranckLejzerowicz/protocols	TruSeq_Nano_PCR_free_Library_Preparation_Kit_single-end	uchime_4.2	TRUE	6.37	F1-W	15-H	TGACTGACAAGGGCACCACAAGAACGC	ATGTCAGTCCACCTATCACACAATCATG	FWD:_{AAGGGCACCACAAGAACGC}_REV:_{CCACCTATCACACAATCATG}	F1-W_15-H	TGACTGACAAGGGCACCACAAGAACGC_ATGTCAGTCCACCTATCACACAATCATG	DSMP_37F_DNA_A_1_2	15316119	TruSeq	normalized	2017-07-04	TruSeq4	Illumina	HiSeq_2500	none	lane_pool37F	27	20.04	4	42	initial_denaturation:95_5;_denaturation:_94_0.5;_annealing:52_0.2;_elongation:_72_1;_40_cycles;_final_elongation:72_2	0.76	50	38
37F.DNA.239.B	CCGGTGTG	CCGGTGTG	18S_rRNA	37F	37F	DNA	239	B	No	MIMARKS-survey	DSMP	gene|marine_metagenome|uncultured_microorganism|uncultured_organism|ecotype|biological_replicate|technical_replicate|interspecies_interaction_between_organisms	0	marine_abyssal_zone_biome	marine_oligotrophic_desert	mud	sediment	aerobe	https://www.qiagen.com/us/cmp/ecom/powersoilkits?COECM_MOBIO_Branded_1707_SEA_PowerSoil__&kwid=%2Bpower%20%2Bsoil%20%2Brna	https://github.com/FranckLejzerowicz/protocols	TruSeq_Nano_PCR_free_Library_Preparation_Kit_single-end	uchime_4.2	TRUE	6.37	F1-W	15-H	TGACTGACAAGGGCACCACAAGAACGC	ATGTCAGTCCACCTATCACACAATCATG	FWD:_{AAGGGCACCACAAGAACGC}_REV:_{CCACCTATCACACAATCATG}	F1-W_15-H	TGACTGACAAGGGCACCACAAGAACGC_ATGTCAGTCCACCTATCACACAATCATG	DSMP_37F_DNA_B_1_1	2278945	TruSeq	normalized	2017-07-04	TruSeq8	Illumina	HiSeq_2500	none	lane_pool37F	40	337.28	4	42	initial_denaturation:95_5;_denaturation:_94_0.5;_annealing:52_0.2;_elongation:_72_1;_40_cycles;_final_elongation:72_2	0.72	50	36
37F.DNA.240.A	CCGGTGTT	CCGGTGTT	18S_rRNA	37F	37F	DNA	240	A	No	MIMARKS-survey	DSMP	gene|marine_metagenome|uncultured_microorganism|uncultured_organism|ecotype|biological_replicate|technical_replicate|interspecies_interaction_between_organisms	0	marine_abyssal_zone_biome	marine_oligotrophic_desert	mud	sediment	aerobe	https://www.qiagen.com/us/cmp/ecom/powersoilkits?COECM_MOBIO_Branded_1707_SEA_PowerSoil__&kwid=%2Bpower%20%2Bsoil%20%2Brna	https://github.com/FranckLejzerowicz/protocols	TruSeq_Nano_PCR_free_Library_Preparation_Kit_single-end	uchime_4.2	TRUE	7.05	F1-W	15-M	TGACTGACAAGGGCACCACAAGAACGC	CGACGAGCCCACCTATCACACAATCATG	FWD:_{AAGGGCACCACAAGAACGC}_REV:_{CCACCTATCACACAATCATG}	F1-W_15-M	TGACTGACAAGGGCACCACAAGAACGC_CGACGAGCCCACCTATCACACAATCATG	DSMP_37F_DNA_A_1_1	15294031	TruSeq	normalized	2017-07-04	TruSeq1	Illumina	HiSeq_2500	none	lane_pool37F	30	22.46	4	42	initial_denaturation:95_5;_denaturation:_94_0.5;_annealing:52_0.2;_elongation:_72_1;_40_cycles;_final_elongation:72_2	3.7	8.11	30.01
37F.DNA.240.B	CCGGTTCC	CCGGTTCC	18S_rRNA	37F	37F	DNA	240	B	No	MIMARKS-survey	DSMP	gene|marine_metagenome|uncultured_microorganism|uncultured_organism|ecotype|biological_replicate|technical_replicate|interspecies_interaction_between_organisms	0	marine_abyssal_zone_biome	marine_oligotrophic_desert	mud	sediment	aerobe	https://www.qiagen.com/us/cmp/ecom/powersoilkits?COECM_MOBIO_Branded_1707_SEA_PowerSoil__&kwid=%2Bpower%20%2Bsoil%20%2Brna	https://github.com/FranckLejzerowicz/protocols	TruSeq_Nano_PCR_free_Library_Preparation_Kit_single-end	uchime_4.2	TRUE	7.05	F1-W	15-M	TGACTGACAAGGGCACCACAAGAACGC	CGACGAGCCCACCTATCACACAATCATG	FWD:_{AAGGGCACCACAAGAACGC}_REV:_{CCACCTATCACACAATCATG}	F1-W_15-M	TGACTGACAAGGGCACCACAAGAACGC_CGACGAGCCCACCTATCACACAATCATG	DSMP_37F_DNA_B_1_2	2198874	TruSeq	normalized	2017-07-04	TruSeq9	Illumina	HiSeq_2500	none	lane_pool37F	40	307.78	4	42	initial_denaturation:95_5;_denaturation:_94_0.5;_annealing:52_0.2;_elongation:_72_1;_40_cycles;_final_elongation:72_2	2.6	15.38	39.99
37F.DNA.241.A	CCGGTTCG	CCGGTTCG	18S_rRNA	37F	37F	DNA	241	A	No	MIMARKS-survey	DSMP	gene|marine_metagenome|uncultured_microorganism|uncultured_organism|ecotype|biological_replicate|technical_replicate|interspecies_interaction_between_organisms	0	marine_abyssal_zone_biome	marine_oligotrophic_desert	mud	sediment	aerobe	https://www.qiagen.com/us/cmp/ecom/powersoilkits?COECM_MOBIO_Branded_1707_SEA_PowerSoil__&kwid=%2Bpower%20%2Bsoil%20%2Brna	https://github.com/FranckLejzerowicz/protocols	TruSeq_Nano_PCR_free_Library_Preparation_Kit_single-end	uchime_4.2	TRUE	11.3	F1-W	15-U	TGACTGACAAGGGCACCACAAGAACGC	TATCGCTGCCACCTATCACACAATCATG	FWD:_{AAGGGCACCACAAGAACGC}_REV:_{CCACCTATCACACAATCATG}	F1-W_15-U	TGACTGACAAGGGCACCACAAGAACGC_TATCGCTGCCACCTATCACACAATCATG	DSMP_37F_DNA_A_1_1	15294031	TruSeq	normalized	2017-07-04	TruSeq1	Illumina	HiSeq_2500	none	lane_pool37F	30	22.46	4	42	initial_denaturation:95_5;_denaturation:_94_0.5;_annealing:52_0.2;_elongation:_72_1;_40_cycles;_final_elongation:72_2	1.9	15.79	30
37F.DNA.241.B	CCGGTTCT	CCGGTTCT	18S_rRNA	37F	37F	DNA	241	B	No	MIMARKS-survey	DSMP	gene|marine_metagenome|uncultured_microorganism|uncultured_organism|ecotype|biological_replicate|technical_replicate|interspecies_interaction_between_organisms	0	marine_abyssal_zone_biome	marine_oligotrophic_desert	mud	sediment	aerobe	https://www.qiagen.com/us/cmp/ecom/powersoilkits?COECM_MOBIO_Branded_1707_SEA_PowerSoil__&kwid=%2Bpower%20%2Bsoil%20%2Brna	https://github.com/FranckLejzerowicz/protocols	TruSeq_Nano_PCR_free_Library_Preparation_Kit_single-end	uchime_4.2	TRUE	11.3	F1-W	15-U	TGACTGACAAGGGCACCACAAGAACGC	TATCGCTGCCACCTATCACACAATCATG	FWD:_{AAGGGCACCACAAGAACGC}_REV:_{CCACCTATCACACAATCATG}	F1-W_15-U	TGACTGACAAGGGCACCACAAGAACGC_TATCGCTGCCACCTATCACACAATCATG	DSMP_37F_DNA_B_1_2	2198874	TruSeq	normalized	2017-07-04	TruSeq9	Illumina	HiSeq_2500	none	lane_pool37F	40	307.78	4	42	initial_denaturation:95_5;_denaturation:_94_0.5;_annealing:52_0.2;_elongation:_72_1;_40_cycles;_final_elongation:72_2	2	20	40
37F.DNA.242.A	CCGGTTGC	CCGGTTGC	18S_rRNA	37F	37F	DNA	242	A	No	MIMARKS-survey	DSMP	gene|marine_metagenome|uncultured_microorganism|uncultured_organism|ecotype|biological_replicate|technical_replicate|interspecies_interaction_between_organisms	0	marine_abyssal_zone_biome	marine_oligotrophic_desert	mud	sediment	aerobe	https://www.qiagen.com/us/cmp/ecom/powersoilkits?COECM_MOBIO_Branded_1707_SEA_PowerSoil__&kwid=%2Bpower%20%2Bsoil%20%2Brna	https://github.com/FranckLejzerowicz/protocols	TruSeq_Nano_PCR_free_Library_Preparation_Kit_single-end	uchime_4.2	TRUE	6	F1-W	15-W	TGACTGACAAGGGCACCACAAGAACGC	TGATATGCCCACCTATCACACAATCATG	FWD:_{AAGGGCACCACAAGAACGC}_REV:_{CCACCTATCACACAATCATG}	F1-W_15-W	TGACTGACAAGGGCACCACAAGAACGC_TGATATGCCCACCTATCACACAATCATG	DSMP_37F_DNA_A_1_3	18703377	TruSeq	normalized	2017-07-04	TruSeq5	Illumina	HiSeq_2500	none	lane_pool37F	27.5	17.75	4	41	initial_denaturation:95_5;_denaturation:_94_0.5;_annealing:52_0.2;_elongation:_72_1;_40_cycles;_final_elongation:72_2	0.88	50	44
37F.DNA.242.B	CCGGTTGG	CCGGTTGG	18S_rRNA	37F	37F	DNA	242	B	No	MIMARKS-survey	DSMP	gene|marine_metagenome|uncultured_microorganism|uncultured_organism|ecotype|biological_replicate|technical_replicate|interspecies_interaction_between_organisms	0	marine_abyssal_zone_biome	marine_oligotrophic_desert	mud	sediment	aerobe	https://www.qiagen.com/us/cmp/ecom/powersoilkits?COECM_MOBIO_Branded_1707_SEA_PowerSoil__&kwid=%2Bpower%20%2Bsoil%20%2Brna	https://github.com/FranckLejzerowicz/protocols	TruSeq_Nano_PCR_free_Library_Preparation_Kit_single-end	uchime_4.2	TRUE	6	F1-W	15-W	TGACTGACAAGGGCACCACAAGAACGC	TGATATGCCCACCTATCACACAATCATG	FWD:_{AAGGGCACCACAAGAACGC}_REV:_{CCACCTATCACACAATCATG}	F1-W_15-W	TGACTGACAAGGGCACCACAAGAACGC_TGATATGCCCACCTATCACACAATCATG	DSMP_37F_DNA_B_1_1	2278945	TruSeq	normalized	2017-07-04	TruSeq8	Illumina	HiSeq_2500	none	lane_pool37F	40	337.28	4	42	initial_denaturation:95_5;_denaturation:_94_0.5;_annealing:52_0.2;_elongation:_72_1;_40_cycles;_final_elongation:72_2	0.8	50	40
37F.DNA.243.A	CCGGTTGT	CCGGTTGT	18S_rRNA	37F	37F	DNA	243	A	No	MIMARKS-survey	DSMP	gene|marine_metagenome|uncultured_microorganism|uncultured_organism|ecotype|biological_replicate|technical_replicate|interspecies_interaction_between_organisms	0	marine_abyssal_zone_biome	marine_oligotrophic_desert	mud	sediment	aerobe	https://www.qiagen.com/us/cmp/ecom/powersoilkits?COECM_MOBIO_Branded_1707_SEA_PowerSoil__&kwid=%2Bpower%20%2Bsoil%20%2Brna	https://github.com/FranckLejzerowicz/protocols	TruSeq_Nano_PCR_free_Library_Preparation_Kit_single-end	uchime_4.2	TRUE	0.246	F1-X	15-D	TGCAGTACAAGGGCACCACAAGAACGC	AGTGCTGCCCACCTATCACACAATCATG	FWD:_{AAGGGCACCACAAGAACGC}_REV:_{CCACCTATCACACAATCATG}	F1-X_15-D	TGCAGTACAAGGGCACCACAAGAACGC_AGTGCTGCCCACCTATCACACAATCATG	DSMP_37F_DNA_A_1_3	18703377	TruSeq	normalized	2017-07-04	TruSeq5	Illumina	HiSeq_2500	none	lane_pool37F	27.5	17.75	4	41	initial_denaturation:95_5;_denaturation:_94_0.5;_annealing:52_0.2;_elongation:_72_1;_40_cycles;_final_elongation:72_2	3.7	7.43	27.49
37F.DNA.243.B	CCGGTTTC	CCGGTTTC	18S_rRNA	37F	37F	DNA	243	B	No	MIMARKS-survey	DSMP	gene|marine_metagenome|uncultured_microorganism|uncultured_organism|ecotype|biological_replicate|technical_replicate|interspecies_interaction_between_organisms	0	marine_abyssal_zone_biome	marine_oligotrophic_desert	mud	sediment	aerobe	https://www.qiagen.com/us/cmp/ecom/powersoilkits?COECM_MOBIO_Branded_1707_SEA_PowerSoil__&kwid=%2Bpower%20%2Bsoil%20%2Brna	https://github.com/FranckLejzerowicz/protocols	TruSeq_Nano_PCR_free_Library_Preparation_Kit_single-end	uchime_4.2	TRUE	0.246	F1-X	15-D	TGCAGTACAAGGGCACCACAAGAACGC	AGTGCTGCCCACCTATCACACAATCATG	FWD:_{AAGGGCACCACAAGAACGC}_REV:_{CCACCTATCACACAATCATG}	F1-X_15-D	TGCAGTACAAGGGCACCACAAGAACGC_AGTGCTGCCCACCTATCACACAATCATG	DSMP_37F_DNA_B_1_1	2278945	TruSeq	normalized	2017-07-04	TruSeq8	Illumina	HiSeq_2500	none	lane_pool37F	40	337.28	4	42	initial_denaturation:95_5;_denaturation:_94_0.5;_annealing:52_0.2;_elongation:_72_1;_40_cycles;_final_elongation:72_2	4.2	9.52	39.98
37F.DNA.244.A	CCGGTTTG	CCGGTTTG	18S_rRNA	37F	37F	DNA	244	A	No	MIMARKS-survey	DSMP	gene|marine_metagenome|uncultured_microorganism|uncultured_organism|ecotype|biological_replicate|technical_replicate|interspecies_interaction_between_organisms	0	marine_abyssal_zone_biome	marine_oligotrophic_desert	mud	sediment	aerobe	https://www.qiagen.com/us/cmp/ecom/powersoilkits?COECM_MOBIO_Branded_1707_SEA_PowerSoil__&kwid=%2Bpower%20%2Bsoil%20%2Brna	https://github.com/FranckLejzerowicz/protocols	TruSeq_Nano_PCR_free_Library_Preparation_Kit_single-end	uchime_4.2	TRUE	0.31	F1-X	15-E	TGCAGTACAAGGGCACCACAAGAACGC	ATAGACTGCCACCTATCACACAATCATG	FWD:_{AAGGGCACCACAAGAACGC}_REV:_{CCACCTATCACACAATCATG}	F1-X_15-E	TGCAGTACAAGGGCACCACAAGAACGC_ATAGACTGCCACCTATCACACAATCATG	DSMP_37F_DNA_A_1_1	15294031	TruSeq	normalized	2017-07-04	TruSeq1	Illumina	HiSeq_2500	none	lane_pool37F	30	22.46	4	42	initial_denaturation:95_5;_denaturation:_94_0.5;_annealing:52_0.2;_elongation:_72_1;_40_cycles;_final_elongation:72_2	0.72	50	36
37F.DNA.244.B	CCGGTTTT	CCGGTTTT	18S_rRNA	37F	37F	DNA	244	B	No	MIMARKS-survey	DSMP	gene|marine_metagenome|uncultured_microorganism|uncultured_organism|ecotype|biological_replicate|technical_replicate|interspecies_interaction_between_organisms	0	marine_abyssal_zone_biome	marine_oligotrophic_desert	mud	sediment	aerobe	https://www.qiagen.com/us/cmp/ecom/powersoilkits?COECM_MOBIO_Branded_1707_SEA_PowerSoil__&kwid=%2Bpower%20%2Bsoil%20%2Brna	https://github.com/FranckLejzerowicz/protocols	TruSeq_Nano_PCR_free_Library_Preparation_Kit_single-end	uchime_4.2	TRUE	0.31	F1-X	15-E	TGCAGTACAAGGGCACCACAAGAACGC	ATAGACTGCCACCTATCACACAATCATG	FWD:_{AAGGGCACCACAAGAACGC}_REV:_{CCACCTATCACACAATCATG}	F1-X_15-E	TGCAGTACAAGGGCACCACAAGAACGC_ATAGACTGCCACCTATCACACAATCATG	DSMP_37F_DNA_B_1_3	1877212	TruSeq	normalized	2017-07-04	TruSeq10	Illumina	HiSeq_2500	none	lane_pool37F	40	535.96	4	41	initial_denaturation:95_5;_denaturation:_94_0.5;_annealing:52_0.2;_elongation:_72_1;_40_cycles;_final_elongation:72_2	0.72	50	36
37F.DNA.245.A	CCGTCCCC	CCGTCCCC	18S_rRNA	37F	37F	DNA	245	A	No	MIMARKS-survey	DSMP	gene|marine_metagenome|uncultured_microorganism|uncultured_organism|ecotype|biological_replicate|technical_replicate|interspecies_interaction_between_organisms	0	marine_abyssal_zone_biome	marine_oligotrophic_desert	mud	sediment	aerobe	https://www.qiagen.com/us/cmp/ecom/powersoilkits?COECM_MOBIO_Branded_1707_SEA_PowerSoil__&kwid=%2Bpower%20%2Bsoil%20%2Brna	https://github.com/FranckLejzerowicz/protocols	TruSeq_Nano_PCR_free_Library_Preparation_Kit_single-end	uchime_4.2	TRUE	7.41	F1-X	15-K	TGCAGTACAAGGGCACCACAAGAACGC	CATCGTACCCACCTATCACACAATCATG	FWD:_{AAGGGCACCACAAGAACGC}_REV:_{CCACCTATCACACAATCATG}	F1-X_15-K	TGCAGTACAAGGGCACCACAAGAACGC_CATCGTACCCACCTATCACACAATCATG	DSMP_37F_DNA_A_1_2	15316119	TruSeq	normalized	2017-07-04	TruSeq4	Illumina	HiSeq_2500	none	lane_pool37F	27	20.04	4	42	initial_denaturation:95_5;_denaturation:_94_0.5;_annealing:52_0.2;_elongation:_72_1;_40_cycles;_final_elongation:72_2	4.4	6.14	27.02
37F.DNA.245.B	CCGTCCCG	CCGTCCCG	18S_rRNA	37F	37F	DNA	245	B	No	MIMARKS-survey	DSMP	gene|marine_metagenome|uncultured_microorganism|uncultured_organism|ecotype|biological_replicate|technical_replicate|interspecies_interaction_between_organisms	0	marine_abyssal_zone_biome	marine_oligotrophic_desert	mud	sediment	aerobe	https://www.qiagen.com/us/cmp/ecom/powersoilkits?COECM_MOBIO_Branded_1707_SEA_PowerSoil__&kwid=%2Bpower%20%2Bsoil%20%2Brna	https://github.com/FranckLejzerowicz/protocols	TruSeq_Nano_PCR_free_Library_Preparation_Kit_single-end	uchime_4.2	TRUE	7.41	F1-X	15-K	TGCAGTACAAGGGCACCACAAGAACGC	CATCGTACCCACCTATCACACAATCATG	FWD:_{AAGGGCACCACAAGAACGC}_REV:_{CCACCTATCACACAATCATG}	F1-X_15-K	TGCAGTACAAGGGCACCACAAGAACGC_CATCGTACCCACCTATCACACAATCATG	DSMP_37F_DNA_B_1_2	2198874	TruSeq	normalized	2017-07-04	TruSeq9	Illumina	HiSeq_2500	none	lane_pool37F	40	307.78	4	42	initial_denaturation:95_5;_denaturation:_94_0.5;_annealing:52_0.2;_elongation:_72_1;_40_cycles;_final_elongation:72_2	5.1	7.84	39.98
37F.DNA.246.A	CCGTCCCT	CCGTCCCT	18S_rRNA	37F	37F	DNA	246	A	No	MIMARKS-survey	DSMP	gene|marine_metagenome|uncultured_microorganism|uncultured_organism|ecotype|biological_replicate|technical_replicate|interspecies_interaction_between_organisms	0	marine_abyssal_zone_biome	marine_oligotrophic_desert	mud	sediment	aerobe	https://www.qiagen.com/us/cmp/ecom/powersoilkits?COECM_MOBIO_Branded_1707_SEA_PowerSoil__&kwid=%2Bpower%20%2Bsoil%20%2Brna	https://github.com/FranckLejzerowicz/protocols	TruSeq_Nano_PCR_free_Library_Preparation_Kit_single-end	uchime_4.2	TRUE	7.64	F1-X	15-V	TGCAGTACAAGGGCACCACAAGAACGC	TATGACATCCACCTATCACACAATCATG	FWD:_{AAGGGCACCACAAGAACGC}_REV:_{CCACCTATCACACAATCATG}	F1-X_15-V	TGCAGTACAAGGGCACCACAAGAACGC_TATGACATCCACCTATCACACAATCATG	DSMP_37F_DNA_A_1_1	15294031	TruSeq	normalized	2017-07-04	TruSeq1	Illumina	HiSeq_2500	none	lane_pool37F	30	22.46	4	42	initial_denaturation:95_5;_denaturation:_94_0.5;_annealing:52_0.2;_elongation:_72_1;_40_cycles;_final_elongation:72_2	1.12	26.79	30
37F.DNA.246.B	CCGTCCGC	CCGTCCGC	18S_rRNA	37F	37F	DNA	246	B	No	MIMARKS-survey	DSMP	gene|marine_metagenome|uncultured_microorganism|uncultured_organism|ecotype|biological_replicate|technical_replicate|interspecies_interaction_between_organisms	0	marine_abyssal_zone_biome	marine_oligotrophic_desert	mud	sediment	aerobe	https://www.qiagen.com/us/cmp/ecom/powersoilkits?COECM_MOBIO_Branded_1707_SEA_PowerSoil__&kwid=%2Bpower%20%2Bsoil%20%2Brna	https://github.com/FranckLejzerowicz/protocols	TruSeq_Nano_PCR_free_Library_Preparation_Kit_single-end	uchime_4.2	TRUE	7.64	F1-X	15-V	TGCAGTACAAGGGCACCACAAGAACGC	TATGACATCCACCTATCACACAATCATG	FWD:_{AAGGGCACCACAAGAACGC}_REV:_{CCACCTATCACACAATCATG}	F1-X_15-V	TGCAGTACAAGGGCACCACAAGAACGC_TATGACATCCACCTATCACACAATCATG	DSMP_37F_DNA_B_1_2	2198874	TruSeq	normalized	2017-07-04	TruSeq9	Illumina	HiSeq_2500	none	lane_pool37F	40	307.78	4	42	initial_denaturation:95_5;_denaturation:_94_0.5;_annealing:52_0.2;_elongation:_72_1;_40_cycles;_final_elongation:72_2	1	50	50
37F.DNA.247.A	CCGTCCGG	CCGTCCGG	18S_rRNA	37F	37F	DNA	247	A	No	MIMARKS-survey	DSMP	gene|marine_metagenome|uncultured_microorganism|uncultured_organism|ecotype|biological_replicate|technical_replicate|interspecies_interaction_between_organisms	0	marine_abyssal_zone_biome	marine_oligotrophic_desert	mud	sediment	aerobe	https://www.qiagen.com/us/cmp/ecom/powersoilkits?COECM_MOBIO_Branded_1707_SEA_PowerSoil__&kwid=%2Bpower%20%2Bsoil%20%2Brna	https://github.com/FranckLejzerowicz/protocols	TruSeq_Nano_PCR_free_Library_Preparation_Kit_single-end	uchime_4.2	TRUE	6.8	F1-Y	15-I	TGCATATAAAGGGCACCACAAGAACGC	ATGTGCTCCCACCTATCACACAATCATG	FWD:_{AAGGGCACCACAAGAACGC}_REV:_{CCACCTATCACACAATCATG}	F1-Y_15-I	TGCATATAAAGGGCACCACAAGAACGC_ATGTGCTCCCACCTATCACACAATCATG	DSMP_37F_DNA_A_1_1	15294031	TruSeq	normalized	2017-07-04	TruSeq1	Illumina	HiSeq_2500	none	lane_pool37F	30	22.46	4	42	initial_denaturation:95_5;_denaturation:_94_0.5;_annealing:52_0.2;_elongation:_72_1;_40_cycles;_final_elongation:72_2	1	50	50
37F.DNA.247.B	CCGTCCGT	CCGTCCGT	18S_rRNA	37F	37F	DNA	247	B	No	MIMARKS-survey	DSMP	gene|marine_metagenome|uncultured_microorganism|uncultured_organism|ecotype|biological_replicate|technical_replicate|interspecies_interaction_between_organisms	0	marine_abyssal_zone_biome	marine_oligotrophic_desert	mud	sediment	aerobe	https://www.qiagen.com/us/cmp/ecom/powersoilkits?COECM_MOBIO_Branded_1707_SEA_PowerSoil__&kwid=%2Bpower%20%2Bsoil%20%2Brna	https://github.com/FranckLejzerowicz/protocols	TruSeq_Nano_PCR_free_Library_Preparation_Kit_single-end	uchime_4.2	TRUE	6.8	F1-Y	15-I	TGCATATAAAGGGCACCACAAGAACGC	ATGTGCTCCCACCTATCACACAATCATG	FWD:_{AAGGGCACCACAAGAACGC}_REV:_{CCACCTATCACACAATCATG}	F1-Y_15-I	TGCATATAAAGGGCACCACAAGAACGC_ATGTGCTCCCACCTATCACACAATCATG	DSMP_37F_DNA_B_1_2	2198874	TruSeq	normalized	2017-07-04	TruSeq9	Illumina	HiSeq_2500	none	lane_pool37F	40	307.78	4	42	initial_denaturation:95_5;_denaturation:_94_0.5;_annealing:52_0.2;_elongation:_72_1;_40_cycles;_final_elongation:72_2	1.08	50	54
37F.DNA.248.A	CCGTCCTC	CCGTCCTC	18S_rRNA	37F	37F	DNA	248	A	No	MIMARKS-survey	DSMP	gene|marine_metagenome|uncultured_microorganism|uncultured_organism|ecotype|biological_replicate|technical_replicate|interspecies_interaction_between_organisms	0	marine_abyssal_zone_biome	marine_oligotrophic_desert	mud	sediment	aerobe	https://www.qiagen.com/us/cmp/ecom/powersoilkits?COECM_MOBIO_Branded_1707_SEA_PowerSoil__&kwid=%2Bpower%20%2Bsoil%20%2Brna	https://github.com/FranckLejzerowicz/protocols	TruSeq_Nano_PCR_free_Library_Preparation_Kit_single-end	uchime_4.2	TRUE	0.599	F1-Y	15-O	TGCATATAAAGGGCACCACAAGAACGC	CGAGCTAGCCACCTATCACACAATCATG	FWD:_{AAGGGCACCACAAGAACGC}_REV:_{CCACCTATCACACAATCATG}	F1-Y_15-O	TGCATATAAAGGGCACCACAAGAACGC_CGAGCTAGCCACCTATCACACAATCATG	DSMP_37F_DNA_A_1_1	15294031	TruSeq	normalized	2017-07-04	TruSeq1	Illumina	HiSeq_2500	none	lane_pool37F	30	22.46	4	42	initial_denaturation:95_5;_denaturation:_94_0.5;_annealing:52_0.2;_elongation:_72_1;_40_cycles;_final_elongation:72_2	4.6	6.52	29.99
37F.DNA.248.B	CCGTCCTG	CCGTCCTG	18S_rRNA	37F	37F	DNA	248	B	No	MIMARKS-survey	DSMP	gene|marine_metagenome|uncultured_microorganism|uncultured_organism|ecotype|biological_replicate|technical_replicate|interspecies_interaction_between_organisms	0	marine_abyssal_zone_biome	marine_oligotrophic_desert	mud	sediment	aerobe	https://www.qiagen.com/us/cmp/ecom/powersoilkits?COECM_MOBIO_Branded_1707_SEA_PowerSoil__&kwid=%2Bpower%20%2Bsoil%20%2Brna	https://github.com/FranckLejzerowicz/protocols	TruSeq_Nano_PCR_free_Library_Preparation_Kit_single-end	uchime_4.2	TRUE	0.599	F1-Y	15-P	TGCATATAAAGGGCACCACAAGAACGC	CTAGCATCCCACCTATCACACAATCATG	FWD:_{AAGGGCACCACAAGAACGC}_REV:_{CCACCTATCACACAATCATG}	F1-Y_15-P	TGCATATAAAGGGCACCACAAGAACGC_CTAGCATCCCACCTATCACACAATCATG	DSMP_37F_DNA_B_1_1	2278945	TruSeq	normalized	2017-07-04	TruSeq8	Illumina	HiSeq_2500	none	lane_pool37F	40	337.28	4	42	initial_denaturation:95_5;_denaturation:_94_0.5;_annealing:52_0.2;_elongation:_72_1;_40_cycles;_final_elongation:72_2	4.9	8.16	39.98
37F.DNA.249.A	CCGTCCTT	CCGTCCTT	18S_rRNA	37F	37F	DNA	249	A	No	MIMARKS-survey	DSMP	gene|marine_metagenome|uncultured_microorganism|uncultured_organism|ecotype|biological_replicate|technical_replicate|interspecies_interaction_between_organisms	0	marine_abyssal_zone_biome	marine_oligotrophic_desert	mud	sediment	aerobe	https://www.qiagen.com/us/cmp/ecom/powersoilkits?COECM_MOBIO_Branded_1707_SEA_PowerSoil__&kwid=%2Bpower%20%2Bsoil%20%2Brna	https://github.com/FranckLejzerowicz/protocols	TruSeq_Nano_PCR_free_Library_Preparation_Kit_single-end	uchime_4.2	TRUE	8.69	F1-Y	15-P	TGCATATAAAGGGCACCACAAGAACGC	CTAGCATCCCACCTATCACACAATCATG	FWD:_{AAGGGCACCACAAGAACGC}_REV:_{CCACCTATCACACAATCATG}	F1-Y_15-P	TGCATATAAAGGGCACCACAAGAACGC_CTAGCATCCCACCTATCACACAATCATG	DSMP_37F_DNA_A_1_2	15316119	TruSeq	normalized	2017-07-04	TruSeq4	Illumina	HiSeq_2500	none	lane_pool37F	27	20.04	4	42	initial_denaturation:95_5;_denaturation:_94_0.5;_annealing:52_0.2;_elongation:_72_1;_40_cycles;_final_elongation:72_2	5	5.4	27
37F.DNA.249.B	CCGTCGCC	CCGTCGCC	18S_rRNA	37F	37F	DNA	249	B	No	MIMARKS-survey	DSMP	gene|marine_metagenome|uncultured_microorganism|uncultured_organism|ecotype|biological_replicate|technical_replicate|interspecies_interaction_between_organisms	0	marine_abyssal_zone_biome	marine_oligotrophic_desert	mud	sediment	aerobe	https://www.qiagen.com/us/cmp/ecom/powersoilkits?COECM_MOBIO_Branded_1707_SEA_PowerSoil__&kwid=%2Bpower%20%2Bsoil%20%2Brna	https://github.com/FranckLejzerowicz/protocols	TruSeq_Nano_PCR_free_Library_Preparation_Kit_single-end	uchime_4.2	TRUE	8.69	F1-Y	15-R	TGCATATAAAGGGCACCACAAGAACGC	CTGTATATCCACCTATCACACAATCATG	FWD:_{AAGGGCACCACAAGAACGC}_REV:_{CCACCTATCACACAATCATG}	F1-Y_15-R	TGCATATAAAGGGCACCACAAGAACGC_CTGTATATCCACCTATCACACAATCATG	DSMP_37F_DNA_B_1_2	2198874	TruSeq	normalized	2017-07-04	TruSeq9	Illumina	HiSeq_2500	none	lane_pool37F	40	307.78	4	42	initial_denaturation:95_5;_denaturation:_94_0.5;_annealing:52_0.2;_elongation:_72_1;_40_cycles;_final_elongation:72_2	0.92	50	46
37F.DNA.250.A	CCGTCGCG	CCGTCGCG	18S_rRNA	37F	37F	DNA	250	A	No	MIMARKS-survey	DSMP	gene|marine_metagenome|uncultured_microorganism|uncultured_organism|ecotype|biological_replicate|technical_replicate|interspecies_interaction_between_organisms	0	marine_abyssal_zone_biome	marine_oligotrophic_desert	mud	sediment	aerobe	https://www.qiagen.com/us/cmp/ecom/powersoilkits?COECM_MOBIO_Branded_1707_SEA_PowerSoil__&kwid=%2Bpower%20%2Bsoil%20%2Brna	https://github.com/FranckLejzerowicz/protocols	TruSeq_Nano_PCR_free_Library_Preparation_Kit_single-end	uchime_4.2	TRUE	15.4	F1-Y	15-R	TGCATATAAAGGGCACCACAAGAACGC	CTGTATATCCACCTATCACACAATCATG	FWD:_{AAGGGCACCACAAGAACGC}_REV:_{CCACCTATCACACAATCATG}	F1-Y_15-R	TGCATATAAAGGGCACCACAAGAACGC_CTGTATATCCACCTATCACACAATCATG	DSMP_37F_DNA_A_1_1	15294031	TruSeq	normalized	2017-07-04	TruSeq1	Illumina	HiSeq_2500	none	lane_pool37F	30	22.46	4	42	initial_denaturation:95_5;_denaturation:_94_0.5;_annealing:52_0.2;_elongation:_72_1;_40_cycles;_final_elongation:72_2	2	15	30
37F.DNA.250.B	CCGTCGCT	CCGTCGCT	18S_rRNA	37F	37F	DNA	250	B	No	MIMARKS-survey	DSMP	gene|marine_metagenome|uncultured_microorganism|uncultured_organism|ecotype|biological_replicate|technical_replicate|interspecies_interaction_between_organisms	0	marine_abyssal_zone_biome	marine_oligotrophic_desert	mud	sediment	aerobe	https://www.qiagen.com/us/cmp/ecom/powersoilkits?COECM_MOBIO_Branded_1707_SEA_PowerSoil__&kwid=%2Bpower%20%2Bsoil%20%2Brna	https://github.com/FranckLejzerowicz/protocols	TruSeq_Nano_PCR_free_Library_Preparation_Kit_single-end	uchime_4.2	TRUE	15.4	F1-Y	15-S	TGCATATAAAGGGCACCACAAGAACGC	TAGCATGTCCACCTATCACACAATCATG	FWD:_{AAGGGCACCACAAGAACGC}_REV:_{CCACCTATCACACAATCATG}	F1-Y_15-S	TGCATATAAAGGGCACCACAAGAACGC_TAGCATGTCCACCTATCACACAATCATG	DSMP_37F_DNA_B_1_3	1877212	TruSeq	normalized	2017-07-04	TruSeq10	Illumina	HiSeq_2500	none	lane_pool37F	40	535.96	4	41	initial_denaturation:95_5;_denaturation:_94_0.5;_annealing:52_0.2;_elongation:_72_1;_40_cycles;_final_elongation:72_2	1.1	50	55
37F.DNA.252.A	CCGTCGGC	CCGTCGGC	18S_rRNA	37F	37F	DNA	252	A	No	MIMARKS-survey	DSMP	gene|marine_metagenome|uncultured_microorganism|uncultured_organism|ecotype|biological_replicate|technical_replicate|interspecies_interaction_between_organisms	0	marine_abyssal_zone_biome	marine_oligotrophic_desert	mud	sediment	aerobe	https://www.qiagen.com/us/cmp/ecom/powersoilkits?COECM_MOBIO_Branded_1707_SEA_PowerSoil__&kwid=%2Bpower%20%2Bsoil%20%2Brna	https://github.com/FranckLejzerowicz/protocols	TruSeq_Nano_PCR_free_Library_Preparation_Kit_single-end	uchime_4.2	TRUE	0.862	F1-Y	15-Z	TGCATATAAAGGGCACCACAAGAACGC	TGTGCATGCCACCTATCACACAATCATG	FWD:_{AAGGGCACCACAAGAACGC}_REV:_{CCACCTATCACACAATCATG}	F1-Y_15-Z	TGCATATAAAGGGCACCACAAGAACGC_TGTGCATGCCACCTATCACACAATCATG	DSMP_37F_DNA_A_1_2	15316119	TruSeq	normalized	2017-07-04	TruSeq4	Illumina	HiSeq_2500	none	lane_pool37F	27	20.04	4	42	initial_denaturation:95_5;_denaturation:_94_0.5;_annealing:52_0.2;_elongation:_72_1;_40_cycles;_final_elongation:72_2	4.6	5.87	27
37F.DNA.252.B	CCGTCGGG	CCGTCGGG	18S_rRNA	37F	37F	DNA	252	B	No	MIMARKS-survey	DSMP	gene|marine_metagenome|uncultured_microorganism|uncultured_organism|ecotype|biological_replicate|technical_replicate|interspecies_interaction_between_organisms	0	marine_abyssal_zone_biome	marine_oligotrophic_desert	mud	sediment	aerobe	https://www.qiagen.com/us/cmp/ecom/powersoilkits?COECM_MOBIO_Branded_1707_SEA_PowerSoil__&kwid=%2Bpower%20%2Bsoil%20%2Brna	https://github.com/FranckLejzerowicz/protocols	TruSeq_Nano_PCR_free_Library_Preparation_Kit_single-end	uchime_4.2	TRUE	0.862	F1-Z	15-D	TGCTCTCAAAGGGCACCACAAGAACGC	AGTGCTGCCCACCTATCACACAATCATG	FWD:_{AAGGGCACCACAAGAACGC}_REV:_{CCACCTATCACACAATCATG}	F1-Z_15-D	TGCTCTCAAAGGGCACCACAAGAACGC_AGTGCTGCCCACCTATCACACAATCATG	DSMP_37F_DNA_B_1_3	1877212	TruSeq	normalized	2017-07-04	TruSeq10	Illumina	HiSeq_2500	none	lane_pool37F	40	535.96	4	41	initial_denaturation:95_5;_denaturation:_94_0.5;_annealing:52_0.2;_elongation:_72_1;_40_cycles;_final_elongation:72_2	6.9	5.8	40.02
37F.DNA.254.A	CCGTCGGT	CCGTCGGT	18S_rRNA	37F	37F	DNA	254	A	No	MIMARKS-survey	DSMP	gene|marine_metagenome|uncultured_microorganism|uncultured_organism|ecotype|biological_replicate|technical_replicate|interspecies_interaction_between_organisms	0	marine_abyssal_zone_biome	marine_oligotrophic_desert	mud	sediment	aerobe	https://www.qiagen.com/us/cmp/ecom/powersoilkits?COECM_MOBIO_Branded_1707_SEA_PowerSoil__&kwid=%2Bpower%20%2Bsoil%20%2Brna	https://github.com/FranckLejzerowicz/protocols	TruSeq_Nano_PCR_free_Library_Preparation_Kit_single-end	uchime_4.2	TRUE	16.5	F1-Z	15-G	TGCTCTCAAAGGGCACCACAAGAACGC	ATGCGTAGCCACCTATCACACAATCATG	FWD:_{AAGGGCACCACAAGAACGC}_REV:_{CCACCTATCACACAATCATG}	F1-Z_15-G	TGCTCTCAAAGGGCACCACAAGAACGC_ATGCGTAGCCACCTATCACACAATCATG	DSMP_37F_DNA_A_1_3	18703377	TruSeq	normalized	2017-07-04	TruSeq5	Illumina	HiSeq_2500	none	lane_pool37F	27.5	17.75	4	41	initial_denaturation:95_5;_denaturation:_94_0.5;_annealing:52_0.2;_elongation:_72_1;_40_cycles;_final_elongation:72_2	1.8	15.28	27.5
37F.DNA.254.B	CCGTCGTC	CCGTCGTC	18S_rRNA	37F	37F	DNA	254	B	No	MIMARKS-survey	DSMP	gene|marine_metagenome|uncultured_microorganism|uncultured_organism|ecotype|biological_replicate|technical_replicate|interspecies_interaction_between_organisms	0	marine_abyssal_zone_biome	marine_oligotrophic_desert	mud	sediment	aerobe	https://www.qiagen.com/us/cmp/ecom/powersoilkits?COECM_MOBIO_Branded_1707_SEA_PowerSoil__&kwid=%2Bpower%20%2Bsoil%20%2Brna	https://github.com/FranckLejzerowicz/protocols	TruSeq_Nano_PCR_free_Library_Preparation_Kit_single-end	uchime_4.2	TRUE	16.5	F1-Z	15-J	TGCTCTCAAAGGGCACCACAAGAACGC	CAGTGCAGCCACCTATCACACAATCATG	FWD:_{AAGGGCACCACAAGAACGC}_REV:_{CCACCTATCACACAATCATG}	F1-Z_15-J	TGCTCTCAAAGGGCACCACAAGAACGC_CAGTGCAGCCACCTATCACACAATCATG	DSMP_37F_DNA_B_1_1	2278945	TruSeq	normalized	2017-07-04	TruSeq8	Illumina	HiSeq_2500	none	lane_pool37F	40	337.28	4	42	initial_denaturation:95_5;_denaturation:_94_0.5;_annealing:52_0.2;_elongation:_72_1;_40_cycles;_final_elongation:72_2	1	50	50
37F.DNA.255.A	CCGTCGTG	CCGTCGTG	18S_rRNA	37F	37F	DNA	255	A	No	MIMARKS-survey	DSMP	gene|marine_metagenome|uncultured_microorganism|uncultured_organism|ecotype|biological_replicate|technical_replicate|interspecies_interaction_between_organisms	0	marine_abyssal_zone_biome	marine_oligotrophic_desert	mud	sediment	aerobe	https://www.qiagen.com/us/cmp/ecom/powersoilkits?COECM_MOBIO_Branded_1707_SEA_PowerSoil__&kwid=%2Bpower%20%2Bsoil%20%2Brna	https://github.com/FranckLejzerowicz/protocols	TruSeq_Nano_PCR_free_Library_Preparation_Kit_single-end	uchime_4.2	TRUE	12.3	F1-Z	15-J	TGCTCTCAAAGGGCACCACAAGAACGC	CAGTGCAGCCACCTATCACACAATCATG	FWD:_{AAGGGCACCACAAGAACGC}_REV:_{CCACCTATCACACAATCATG}	F1-Z_15-J	TGCTCTCAAAGGGCACCACAAGAACGC_CAGTGCAGCCACCTATCACACAATCATG	DSMP_37F_DNA_A_1_1	15294031	TruSeq	normalized	2017-07-04	TruSeq1	Illumina	HiSeq_2500	none	lane_pool37F	30	22.46	4	42	initial_denaturation:95_5;_denaturation:_94_0.5;_annealing:52_0.2;_elongation:_72_1;_40_cycles;_final_elongation:72_2	6.2	4.84	30.01
37F.DNA.255.B	CCGTCGTT	CCGTCGTT	18S_rRNA	37F	37F	DNA	255	B	No	MIMARKS-survey	DSMP	gene|marine_metagenome|uncultured_microorganism|uncultured_organism|ecotype|biological_replicate|technical_replicate|interspecies_interaction_between_organisms	0	marine_abyssal_zone_biome	marine_oligotrophic_desert	mud	sediment	aerobe	https://www.qiagen.com/us/cmp/ecom/powersoilkits?COECM_MOBIO_Branded_1707_SEA_PowerSoil__&kwid=%2Bpower%20%2Bsoil%20%2Brna	https://github.com/FranckLejzerowicz/protocols	TruSeq_Nano_PCR_free_Library_Preparation_Kit_single-end	uchime_4.2	TRUE	12.3	F1-Z	15-L	TGCTCTCAAAGGGCACCACAAGAACGC	CATGCAGTCCACCTATCACACAATCATG	FWD:_{AAGGGCACCACAAGAACGC}_REV:_{CCACCTATCACACAATCATG}	F1-Z_15-L	TGCTCTCAAAGGGCACCACAAGAACGC_CATGCAGTCCACCTATCACACAATCATG	DSMP_37F_DNA_B_1_1	2278945	TruSeq	normalized	2017-07-04	TruSeq8	Illumina	HiSeq_2500	none	lane_pool37F	40	337.28	4	42	initial_denaturation:95_5;_denaturation:_94_0.5;_annealing:52_0.2;_elongation:_72_1;_40_cycles;_final_elongation:72_2	1.4	50	70
37F.DNA.256.A	CCGTCTCC	CCGTCTCC	18S_rRNA	37F	37F	DNA	256	A	No	MIMARKS-survey	DSMP	gene|marine_metagenome|uncultured_microorganism|uncultured_organism|ecotype|biological_replicate|technical_replicate|interspecies_interaction_between_organisms	0	marine_abyssal_zone_biome	marine_oligotrophic_desert	mud	sediment	aerobe	https://www.qiagen.com/us/cmp/ecom/powersoilkits?COECM_MOBIO_Branded_1707_SEA_PowerSoil__&kwid=%2Bpower%20%2Bsoil%20%2Brna	https://github.com/FranckLejzerowicz/protocols	TruSeq_Nano_PCR_free_Library_Preparation_Kit_single-end	uchime_4.2	TRUE	9.63	F1-Z	15-L	TGCTCTCAAAGGGCACCACAAGAACGC	CATGCAGTCCACCTATCACACAATCATG	FWD:_{AAGGGCACCACAAGAACGC}_REV:_{CCACCTATCACACAATCATG}	F1-Z_15-L	TGCTCTCAAAGGGCACCACAAGAACGC_CATGCAGTCCACCTATCACACAATCATG	DSMP_37F_DNA_A_1_2	15316119	TruSeq	normalized	2017-07-04	TruSeq4	Illumina	HiSeq_2500	none	lane_pool37F	27	20.04	4	42	initial_denaturation:95_5;_denaturation:_94_0.5;_annealing:52_0.2;_elongation:_72_1;_40_cycles;_final_elongation:72_2	1.9	14.21	27
37F.DNA.256.B	CCGTCTCG	CCGTCTCG	18S_rRNA	37F	37F	DNA	256	B	No	MIMARKS-survey	DSMP	gene|marine_metagenome|uncultured_microorganism|uncultured_organism|ecotype|biological_replicate|technical_replicate|interspecies_interaction_between_organisms	0	marine_abyssal_zone_biome	marine_oligotrophic_desert	mud	sediment	aerobe	https://www.qiagen.com/us/cmp/ecom/powersoilkits?COECM_MOBIO_Branded_1707_SEA_PowerSoil__&kwid=%2Bpower%20%2Bsoil%20%2Brna	https://github.com/FranckLejzerowicz/protocols	TruSeq_Nano_PCR_free_Library_Preparation_Kit_single-end	uchime_4.2	TRUE	9.63	F1-Z	15-T	TGCTCTCAAAGGGCACCACAAGAACGC	TAGTGAGCCCACCTATCACACAATCATG	FWD:_{AAGGGCACCACAAGAACGC}_REV:_{CCACCTATCACACAATCATG}	F1-Z_15-T	TGCTCTCAAAGGGCACCACAAGAACGC_TAGTGAGCCCACCTATCACACAATCATG	DSMP_37F_DNA_B_1_1	2278945	TruSeq	normalized	2017-07-04	TruSeq8	Illumina	HiSeq_2500	none	lane_pool37F	40	337.28	4	42	initial_denaturation:95_5;_denaturation:_94_0.5;_annealing:52_0.2;_elongation:_72_1;_40_cycles;_final_elongation:72_2	1.9	21.05	39.99
37F.DNA.257.A	CCGTCTCT	CCGTCTCT	18S_rRNA	37F	37F	DNA	257	A	No	MIMARKS-survey	DSMP	gene|marine_metagenome|uncultured_microorganism|uncultured_organism|ecotype|biological_replicate|technical_replicate|interspecies_interaction_between_organisms	0	marine_abyssal_zone_biome	marine_oligotrophic_desert	mud	sediment	aerobe	https://www.qiagen.com/us/cmp/ecom/powersoilkits?COECM_MOBIO_Branded_1707_SEA_PowerSoil__&kwid=%2Bpower%20%2Bsoil%20%2Brna	https://github.com/FranckLejzerowicz/protocols	TruSeq_Nano_PCR_free_Library_Preparation_Kit_single-end	uchime_4.2	TRUE	6.17	F1-Z	15-T	TGCTCTCAAAGGGCACCACAAGAACGC	TAGTGAGCCCACCTATCACACAATCATG	FWD:_{AAGGGCACCACAAGAACGC}_REV:_{CCACCTATCACACAATCATG}	F1-Z_15-T	TGCTCTCAAAGGGCACCACAAGAACGC_TAGTGAGCCCACCTATCACACAATCATG	DSMP_37F_DNA_A_1_3	18703377	TruSeq	normalized	2017-07-04	TruSeq5	Illumina	HiSeq_2500	none	lane_pool37F	27.5	17.75	4	41	initial_denaturation:95_5;_denaturation:_94_0.5;_annealing:52_0.2;_elongation:_72_1;_40_cycles;_final_elongation:72_2	3.6	7.64	27.5
37F.DNA.257.B	CCGTCTGC	CCGTCTGC	18S_rRNA	37F	37F	DNA	257	B	No	MIMARKS-survey	DSMP	gene|marine_metagenome|uncultured_microorganism|uncultured_organism|ecotype|biological_replicate|technical_replicate|interspecies_interaction_between_organisms	0	marine_abyssal_zone_biome	marine_oligotrophic_desert	mud	sediment	aerobe	https://www.qiagen.com/us/cmp/ecom/powersoilkits?COECM_MOBIO_Branded_1707_SEA_PowerSoil__&kwid=%2Bpower%20%2Bsoil%20%2Brna	https://github.com/FranckLejzerowicz/protocols	TruSeq_Nano_PCR_free_Library_Preparation_Kit_single-end	uchime_4.2	TRUE	6.17	F1-Z	15-Y	TGCTCTCAAAGGGCACCACAAGAACGC	TGTCATAGCCACCTATCACACAATCATG	FWD:_{AAGGGCACCACAAGAACGC}_REV:_{CCACCTATCACACAATCATG}	F1-Z_15-Y	TGCTCTCAAAGGGCACCACAAGAACGC_TGTCATAGCCACCTATCACACAATCATG	DSMP_37F_DNA_B_1_2	2198874	TruSeq	normalized	2017-07-04	TruSeq9	Illumina	HiSeq_2500	none	lane_pool37F	40	307.78	4	42	initial_denaturation:95_5;_denaturation:_94_0.5;_annealing:52_0.2;_elongation:_72_1;_40_cycles;_final_elongation:72_2	2.7	14.81	39.99
37F.DNA.258.A	CCGTCTGG	CCGTCTGG	18S_rRNA	37F	37F	DNA	258	A	No	MIMARKS-survey	DSMP	gene|marine_metagenome|uncultured_microorganism|uncultured_organism|ecotype|biological_replicate|technical_replicate|interspecies_interaction_between_organisms	0	marine_abyssal_zone_biome	marine_oligotrophic_desert	mud	sediment	aerobe	https://www.qiagen.com/us/cmp/ecom/powersoilkits?COECM_MOBIO_Branded_1707_SEA_PowerSoil__&kwid=%2Bpower%20%2Bsoil%20%2Brna	https://github.com/FranckLejzerowicz/protocols	TruSeq_Nano_PCR_free_Library_Preparation_Kit_single-end	uchime_4.2	TRUE	5.79	F1-Z	15-Y	TGCTCTCAAAGGGCACCACAAGAACGC	TGTCATAGCCACCTATCACACAATCATG	FWD:_{AAGGGCACCACAAGAACGC}_REV:_{CCACCTATCACACAATCATG}	F1-Z_15-Y	TGCTCTCAAAGGGCACCACAAGAACGC_TGTCATAGCCACCTATCACACAATCATG	DSMP_37F_DNA_A_1_1	15294031	TruSeq	normalized	2017-07-04	TruSeq1	Illumina	HiSeq_2500	none	lane_pool37F	30	22.46	4	42	initial_denaturation:95_5;_denaturation:_94_0.5;_annealing:52_0.2;_elongation:_72_1;_40_cycles;_final_elongation:72_2	1.2	25	30
37F.DNA.258.B	CCGTCTGT	CCGTCTGT	18S_rRNA	37F	37F	DNA	258	B	No	MIMARKS-survey	DSMP	gene|marine_metagenome|uncultured_microorganism|uncultured_organism|ecotype|biological_replicate|technical_replicate|interspecies_interaction_between_organisms	0	marine_abyssal_zone_biome	marine_oligotrophic_desert	mud	sediment	aerobe	https://www.qiagen.com/us/cmp/ecom/powersoilkits?COECM_MOBIO_Branded_1707_SEA_PowerSoil__&kwid=%2Bpower%20%2Bsoil%20%2Brna	https://github.com/FranckLejzerowicz/protocols	TruSeq_Nano_PCR_free_Library_Preparation_Kit_single-end	uchime_4.2	TRUE	5.79	F1-A	15-A	CACACACAAAGGGCACCACAAGAACGC	AGACACACCCACCTATCACACAATCATG	FWD:_{AAGGGCACCACAAGAACGC}_REV:_{CCACCTATCACACAATCATG}	F1-A_15-A	CACACACAAAGGGCACCACAAGAACGC_AGACACACCCACCTATCACACAATCATG	DSMP_37F_DNA_B_2_1	2142671	TruSeq	normalized	2017-07-04	TruSeq11	Illumina	HiSeq_2500	none	lane_pool37F	40	372.54	4	45	initial_denaturation:95_5;_denaturation:_94_0.5;_annealing:52_0.2;_elongation:_72_1;_40_cycles;_final_elongation:72_2	4.9	8.16	39.98
37F.DNA.260.A	CCGTCTTT	CCGTCTTT	18S_rRNA	37F	37F	DNA	260	A	No	MIMARKS-survey	DSMP	gene|marine_metagenome|uncultured_microorganism|uncultured_organism|ecotype|biological_replicate|technical_replicate|interspecies_interaction_between_organisms	0	marine_abyssal_zone_biome	marine_oligotrophic_desert	mud	sediment	aerobe	https://www.qiagen.com/us/cmp/ecom/powersoilkits?COECM_MOBIO_Branded_1707_SEA_PowerSoil__&kwid=%2Bpower%20%2Bsoil%20%2Brna	https://github.com/FranckLejzerowicz/protocols	TruSeq_Nano_PCR_free_Library_Preparation_Kit_single-end	uchime_4.2	TRUE	11	F1-M	15-S	GCATCATCAAGGGCACCACAAGAACGC	TAGCATGTCCACCTATCACACAATCATG	FWD:_{AAGGGCACCACAAGAACGC}_REV:_{CCACCTATCACACAATCATG}	F1-M_15-S	GCATCATCAAGGGCACCACAAGAACGC_TAGCATGTCCACCTATCACACAATCATG	DSMP_37F_DNA_A_2_2	20187353	TruSeq	normalized	2017-07-04	TruSeq7	Illumina	HiSeq_2500	none	lane_pool37F	30	27.43	4	45	initial_denaturation:95_5;_denaturation:_94_0.5;_annealing:52_0.2;_elongation:_72_1;_40_cycles;_final_elongation:72_2	0.9	50	45
37F.DNA.260.B	CCGTGCCC	CCGTGCCC	18S_rRNA	37F	37F	DNA	260	B	No	MIMARKS-survey	DSMP	gene|marine_metagenome|uncultured_microorganism|uncultured_organism|ecotype|biological_replicate|technical_replicate|interspecies_interaction_between_organisms	0	marine_abyssal_zone_biome	marine_oligotrophic_desert	mud	sediment	aerobe	https://www.qiagen.com/us/cmp/ecom/powersoilkits?COECM_MOBIO_Branded_1707_SEA_PowerSoil__&kwid=%2Bpower%20%2Bsoil%20%2Brna	https://github.com/FranckLejzerowicz/protocols	TruSeq_Nano_PCR_free_Library_Preparation_Kit_single-end	uchime_4.2	TRUE	11	F1-M	15-S	GCATCATCAAGGGCACCACAAGAACGC	TAGCATGTCCACCTATCACACAATCATG	FWD:_{AAGGGCACCACAAGAACGC}_REV:_{CCACCTATCACACAATCATG}	F1-M_15-S	GCATCATCAAGGGCACCACAAGAACGC_TAGCATGTCCACCTATCACACAATCATG	DSMP_37F_DNA_B_2_1	2142671	TruSeq	normalized	2017-07-04	TruSeq11	Illumina	HiSeq_2500	none	lane_pool37F	40	372.54	4	45	initial_denaturation:95_5;_denaturation:_94_0.5;_annealing:52_0.2;_elongation:_72_1;_40_cycles;_final_elongation:72_2	1	50	50
37F.DNA.261.A	CCGTGCCG	CCGTGCCG	18S_rRNA	37F	37F	DNA	261	A	No	MIMARKS-survey	DSMP	gene|marine_metagenome|uncultured_microorganism|uncultured_organism|ecotype|biological_replicate|technical_replicate|interspecies_interaction_between_organisms	0	marine_abyssal_zone_biome	marine_oligotrophic_desert	mud	sediment	aerobe	https://www.qiagen.com/us/cmp/ecom/powersoilkits?COECM_MOBIO_Branded_1707_SEA_PowerSoil__&kwid=%2Bpower%20%2Bsoil%20%2Brna	https://github.com/FranckLejzerowicz/protocols	TruSeq_Nano_PCR_free_Library_Preparation_Kit_single-end	uchime_4.2	TRUE	12	F1-A	15-Z	CACACACAAAGGGCACCACAAGAACGC	TGTGCATGCCACCTATCACACAATCATG	FWD:_{AAGGGCACCACAAGAACGC}_REV:_{CCACCTATCACACAATCATG}	F1-A_15-Z	CACACACAAAGGGCACCACAAGAACGC_TGTGCATGCCACCTATCACACAATCATG	DSMP_37F_DNA_A_2_1	15734564	TruSeq	normalized	2017-07-04	TruSeq6	Illumina	HiSeq_2500	none	lane_pool37F	30	24.3	4	45	initial_denaturation:95_5;_denaturation:_94_0.5;_annealing:52_0.2;_elongation:_72_1;_40_cycles;_final_elongation:72_2	3.6	8.33	29.99
37F.DNA.261.B	CCGTGCCT	CCGTGCCT	18S_rRNA	37F	37F	DNA	261	B	No	MIMARKS-survey	DSMP	gene|marine_metagenome|uncultured_microorganism|uncultured_organism|ecotype|biological_replicate|technical_replicate|interspecies_interaction_between_organisms	0	marine_abyssal_zone_biome	marine_oligotrophic_desert	mud	sediment	aerobe	https://www.qiagen.com/us/cmp/ecom/powersoilkits?COECM_MOBIO_Branded_1707_SEA_PowerSoil__&kwid=%2Bpower%20%2Bsoil%20%2Brna	https://github.com/FranckLejzerowicz/protocols	TruSeq_Nano_PCR_free_Library_Preparation_Kit_single-end	uchime_4.2	TRUE	12	F1-B	15-O	CACATGATAAGGGCACCACAAGAACGC	CGAGCTAGCCACCTATCACACAATCATG	FWD:_{AAGGGCACCACAAGAACGC}_REV:_{CCACCTATCACACAATCATG}	F1-B_15-O	CACATGATAAGGGCACCACAAGAACGC_CGAGCTAGCCACCTATCACACAATCATG	DSMP_37F_DNA_B_2_2	1635791	TruSeq	normalized	2017-07-04	TruSeq12	Illumina	HiSeq_2500	none	lane_pool37F	40	363.18	4	45	initial_denaturation:95_5;_denaturation:_94_0.5;_annealing:52_0.2;_elongation:_72_1;_40_cycles;_final_elongation:72_2	4.4	9.09	40
37F.DNA.262.A	CCGTGCGC	CCGTGCGC	18S_rRNA	37F	37F	DNA	262	A	No	MIMARKS-survey	DSMP	gene|marine_metagenome|uncultured_microorganism|uncultured_organism|ecotype|biological_replicate|technical_replicate|interspecies_interaction_between_organisms	0	marine_abyssal_zone_biome	marine_oligotrophic_desert	mud	sediment	aerobe	https://www.qiagen.com/us/cmp/ecom/powersoilkits?COECM_MOBIO_Branded_1707_SEA_PowerSoil__&kwid=%2Bpower%20%2Bsoil%20%2Brna	https://github.com/FranckLejzerowicz/protocols	TruSeq_Nano_PCR_free_Library_Preparation_Kit_single-end	uchime_4.2	TRUE	1.11	F1-L	15-J	GCACTGCAAAGGGCACCACAAGAACGC	CAGTGCAGCCACCTATCACACAATCATG	FWD:_{AAGGGCACCACAAGAACGC}_REV:_{CCACCTATCACACAATCATG}	F1-L_15-J	GCACTGCAAAGGGCACCACAAGAACGC_CAGTGCAGCCACCTATCACACAATCATG	DSMP_37F_DNA_A_2_2	20187353	TruSeq	normalized	2017-07-04	TruSeq7	Illumina	HiSeq_2500	none	lane_pool37F	30	27.43	4	45	initial_denaturation:95_5;_denaturation:_94_0.5;_annealing:52_0.2;_elongation:_72_1;_40_cycles;_final_elongation:72_2	9.5	3.16	30.02
[truncated: 1,503 more rows]
[truncated: 51 more columns]

## Sheet: TableS3
Table S3: 37F reads per Foraminifera order across areas in terms of counts (first table) and percent per area (second table)
[truncated: 56 more rows]

[truncated: 6 more sheets: TableS4, TableS5, TableS6, TableS7, TableS8, TableS9]
